# Supplementary material for: Genetic variation underlying cognition and its relation with neurological outcomes and brain imaging
Source: Aging (Albany NY). 2019 Mar 4;11(5):1440–56. doi: 10.18632/aging.101844 (PMC6428100; doi:10.18632/aging.101844)
Supplement: Supplementary Table S1 [file aging-11-101844-s002.xlsx]

## Sheet: Sheet1
Supplementary Table S1. Genetic variants used for constructing polygenic scores, with their corresponding summary statistics.
Genetic variant	Chromosome	Basepair position	Allele 1	Allele 2	Frequency allele 1	Z-score general cognitive function	P-value general cognitive function	Beta educational attainment	P-value educational attainment	Z-score intracranial volume	P-value intracranial volume
rs10145335	14	98547748	A	G	0.2469	-6.029	1.65e-09	-0.006	0.04185	-1.095	0.2734
rs10514301	5	87939654	T	C	0.1225	6.905	5.01e-12	0.017	1.788e-05	-2.412	0.01585
rs10761765	10	65188973	A	G	0.1967	-5.761	8.37e-09	-0.013	2.246e-05	1.234	0.2172
rs10786662	10	103989812	C	G	0.568	-7.766	8.09e-15	-0.017	3.669e-12	-0.222	0.8242
rs10798879	1	32096815	T	C	0.3734	-7.797	6.36e-15	-0.01	7.553e-05	0.557	0.5776
rs10806984	6	24181831	A	C	0.6479	6.284	3.3e-10	-0.001	0.7139	0.925	0.3548
rs10875914	12	49422094	A	G	0.5981	-6.59	4.39e-11	-0.008	0.001187	-0.772	0.4402
rs10996430	10	67213589	A	G	0.762	-5.731	9.98e-09	-0.004	0.1305	-0.686	0.4926
rs11126396	2	73565143	T	C	0.2939	-5.599	2.15e-08	-0.008	0.002679	1.52	0.1285
rs111342015	6	43227141	A	G	0.097	5.542	3e-08	-0.005	0.2656	0.193	0.847
rs111599092	3	49502779	A	G	0.1316	5.755	8.64e-09	0.024	9.524e-10	4.923	8.506e-07
rs11168951	12	49661715	T	C	0.1019	5.565	2.62e-08	0.011	0.009527	0.848	0.3966
rs112780312	1	153797015	A	G	0.2831	-5.736	9.72e-09	-0.007	0.006138	-1.154	0.2486
rs113714691	8	85804582	T	C	0.1073	-6.368	1.91e-10	-0.015	0.0003948	0.473	0.6363
rs11628208	14	36994709	A	C	0.3998	-5.905	3.52e-09	-0.004	0.09369	0.878	0.3797
rs11662271	18	50907365	T	C	0.4758	6.971	3.14e-12	0.01	4.846e-05	-1.176	0.2397
rs11678106	2	82444107	T	C	0.5116	6.013	1.83e-09	-0.002	0.5282	0.719	0.4721
rs11720236	3	127161689	T	G	0.8302	-6.088	1.14e-09	-0.016	2.421e-06	-0.553	0.5803
rs117431198	20	58219763	T	C	0.0369	-5.512	3.55e-08	-0.02	0.00316	-0.417	0.6768
rs11759522	6	3450814	C	G	0.5536	-5.568	2.57e-08	-0.011	1.529e-05	-1.154	0.2483
rs117793008	10	104198528	A	G	0.9348	5.58	2.4e-08	0.025	1.364e-06	-0.365	0.715
rs11793831	9	23362311	T	G	0.4089	7.246	4.29e-13	0.025	5.946e-22	0.419	0.6751
rs11884495	2	162059969	A	T	0.5077	6.009	1.86e-09	0.015	8.795e-10	2.419	0.01557
rs11896887	2	163830427	A	G	0.4438	6.046	1.48e-09	-0.002	0.3476	-0.59	0.5549
rs11970030	6	20930113	C	G	0.1205	-5.723	1.05e-08	-0.01	0.007416	1.535	0.1249
rs12438326	15	51037974	A	G	0.6564	5.58	2.4e-08	0.004	0.08773	0.146	0.884
rs12441495	15	41222487	C	G	0.1234	-5.836	5.35e-09	-0.01	0.009175	1.398	0.1621
rs12485060	22	34265796	T	C	0.5848	-5.51	3.59e-08	-0.005	0.03365	0.731	0.4648
rs12646225	4	696848	T	C	0.108	5.464	4.65e-08	0.008	0.09964	1.053	0.2926
rs12707116	7	133424909	T	C	0.5234	-6.616	3.7e-11	-0.012	1.399e-06	1.321	0.1866
rs12713315	2	56458509	T	C	0.7201	-5.524	3.31e-08	-0.002	0.5032	-2.014	0.04397
rs12918191	16	50945156	A	G	0.7579	5.502	3.75e-08	0.007	0.02038	-0.3	0.7645
rs13062354	3	35528166	A	G	0.5147	-5.537	3.09e-08	0.002	0.5208	-0.346	0.7296
rs13107325	4	103188709	T	C	0.0729	-8.327	8.32e-17	-0.015	0.006831	2.39	0.01686
rs13146981	4	152720703	T	C	0.4853	-6.126	8.99e-10	-0.007	0.007798	-0.137	0.8913
rs1318878	12	15543479	A	C	0.2099	-6.381	1.75e-10	-0.014	6.774e-06	-2.099	0.03583
rs13262595	8	143316970	A	G	0.4332	-7.25	4.18e-13	-0.006	0.01648	-0.214	0.8304
rs13278931	8	30879207	T	G	0.4497	-5.692	1.25e-08	-0.009	0.0005406	-0.758	0.4485
rs13425585	2	157487273	C	G	0.5064	-5.474	4.4e-08	-0.009	0.0002462	-0.94	0.3473
rs13428598	2	144250487	T	C	0.3778	5.939	2.87e-09	0.017	1.329e-11	0.608	0.5431
rs1343700	3	123571754	A	G	0.6316	5.636	1.74e-08	0.01	7.982e-05	1.736	0.0826
rs1343775	1	41757993	A	G	0.7802	8.339	7.5e-17	0.014	4.963e-06	0.122	0.9031
rs1363119	19	18444809	A	G	0.4511	-6.676	2.45e-11	-0.008	0.001616	-3.024	0.002498
rs1408579	10	101912194	T	C	0.479	6.772	1.27e-11	0.006	0.0189	2.869	0.00412
rs1428472	5	66500842	A	C	0.6813	5.464	4.65e-08	0.007	0.01162	0.852	0.3942
rs1473634	8	20915316	A	G	0.7064	-5.536	3.09e-08	-0.008	0.005146	0.885	0.376
rs1541102	21	40628765	T	C	0.3582	5.481	4.24e-08	0.003	0.1986	2.686	0.007227
rs1699462	9	23857083	T	G	0.4064	6.598	4.17e-11	0.003	0.3004	0.428	0.6688
rs1702877	12	56427808	T	C	0.3309	6.874	6.24e-12	0.018	1.643e-11	2.117	0.03429
rs17032400	4	103190229	T	C	0.5423	-6.029	1.65e-09	-0.007	0.003979	-1.42	0.1555
rs17251689	12	93067870	C	G	0.203	5.678	1.37e-08	0.007	0.02767	-0.484	0.6282
rs17420654	4	16414810	T	C	0.3315	-5.499	3.81e-08	-0.008	0.003651	1.16	0.2462
rs17589603	1	72632885	A	G	0.9021	6.587	4.5e-11	0.011	0.006675	0.201	0.8407
rs17663165	3	71677981	A	C	0.4071	5.609	2.04e-08	0.009	0.0004484	1.033	0.3016
rs1787003	18	13104251	A	G	0.3826	5.511	3.58e-08	0.006	0.03793	3.322	0.0008924
rs179994	6	16320987	A	C	0.6069	6.15	7.77e-10	0.001	0.6521	0.112	0.911
rs1892423	1	41849340	A	C	0.4351	-6.036	1.58e-09	-0.009	0.0005167	0.232	0.8165
rs1895471	19	31942961	A	G	0.6679	5.899	3.65e-09	0.004	0.161	0.187	0.8518
rs1953522	1	216837241	A	C	0.3801	-5.575	2.47e-08	-0.006	0.01656	0.934	0.3504
rs2007481	7	69996371	A	G	0.6498	6.018	1.77e-09	0.004	0.1692	1.463	0.1434
rs2077610	3	70911271	A	T	0.538	5.462	4.72e-08	-0.003	0.3014	1.469	0.1419
rs2239647	14	33292743	A	C	0.4473	-7.317	2.54e-13	-0.007	0.004792	-0.477	0.6334
rs2284871	2	162888055	T	C	0.3067	7.222	5.11e-13	0.014	1.589e-07	0.514	0.6074
rs2333604	14	30071738	A	C	0.3861	-6.372	1.87e-10	-0.01	8.248e-05	-0.863	0.3879
rs2388334	6	98591622	A	G	0.5245	-11.469	1.89e-30	-0.023	6.559e-21	-1.585	0.113
rs2420551	1	69438777	A	T	0.8963	-5.599	2.15e-08	-0.014	0.001122	0.736	0.4618
rs2425161	20	34427192	A	G	0.8182	-6.095	1.09e-09	-0.007	0.03501	-0.607	0.5441
rs2426132	20	47723127	C	G	0.4563	8.448	2.96e-17	0.012	5.322e-07	0.836	0.4031
rs2457192	16	12197441	A	C	0.7024	-5.719	1.07e-08	-0.009	0.0007157	-0.463	0.6434
rs2478295	13	106635505	C	G	0.2549	7.17	7.5e-13	0.011	0.0001102	-0.186	0.8521
rs2726513	4	106217358	T	G	0.4068	-8.648	5.26e-18	-0.014	5.87e-08	-0.845	0.3983
rs2765042	14	103990745	A	G	0.368	-5.518	3.43e-08	-0.01	0.0002021	-1.164	0.2445
rs2819336	1	44015809	T	C	0.3557	7.077	1.48e-12	0.017	6.117e-11	-0.251	0.8018
rs28549862	8	64662318	A	G	0.2506	5.555	2.77e-08	-0.007	0.01515	-0.09	0.9281
rs28612284	14	69712437	T	G	0.9842	5.51	3.59e-08	0.027	0.004449	0.827	0.4082
rs28657585	3	48736216	A	T	0.8781	-5.757	8.54e-09	-0.021	8.806e-08	-0.474	0.6353
rs28892332	2	118536571	T	C	0.0431	5.66	1.51e-08	0.009	0.1259	-0.619	0.5361
rs2906455	1	44341895	T	C	0.0988	-6.153	7.6e-10	-0.023	3.628e-08	-1.772	0.07642
rs3092073	20	44595649	A	G	0.4536	-5.719	1.07e-08	-0.01	6.514e-05	-1.137	0.2556
rs34172651	16	24766841	T	C	0.6934	-6.059	1.37e-09	-0.01	0.0001672	0.483	0.6294
rs34180096	7	104608592	T	C	0.547	-6.006	1.9e-09	-0.006	0.01312	2.077	0.03782
rs34305371	1	72733610	A	G	0.0969	5.686	1.3e-08	0.036	2.344e-16	0.854	0.3932
rs34627	5	60528806	A	G	0.4801	5.953	2.64e-09	0.009	0.003883	1.395	0.163
rs34811474	4	25408838	A	G	0.2215	5.797	6.74e-09	0.01	0.003066	0.629	0.5292
rs35891966	11	20129311	A	G	0.0691	-5.69	1.27e-08	0	0.9993	0.015	0.9878
rs36004779	5	59603880	A	G	0.8225	5.454	4.94e-08	0.01	0.001771	1.614	0.1066
rs36162392	6	26569135	T	C	0.8906	-8.512	1.71e-17	-0.006	0.1614	-0.965	0.3344
rs3817334	11	47650993	T	C	0.4055	-6.132	8.65e-10	0	0.8535	-1.88	0.06007
rs3850610	15	83221392	A	C	0.2401	5.931	3.01e-09	0.006	0.04288	1.254	0.21
rs3914453	9	120677877	A	T	0.4124	5.463	4.69e-08	0.005	0.04843	-0.532	0.595
rs39302	7	21467190	T	C	0.2036	-5.55	2.86e-08	-0.005	0.1242	-0.957	0.3383
rs407102	1	109846278	T	C	0.7051	-6.351	2.13e-10	-0.009	0.001351	-2.114	0.03452
rs421211	5	139581773	A	G	0.5428	5.897	3.71e-09	0.006	0.02405	1.311	0.1898
rs424029	3	85010039	A	G	0.0436	-6.062	1.35e-09	-0.011	0.07318	-0.444	0.6572
rs4294650	13	21356540	T	C	0.311	5.92	3.23e-09	0.009	0.001162	1.844	0.0652
rs4636654	11	28642653	A	G	0.4014	5.64	1.7e-08	0.004	0.08092	-0.436	0.6627
rs4690029	4	2722815	T	C	0.5598	6.073	1.25e-09	0.009	0.0001844	-1.914	0.05566
rs4720476	7	44773310	T	C	0.5406	-5.48	4.24e-08	-0.006	0.01125	-1.674	0.09416
rs4781499	16	13630944	A	G	0.8457	5.782	7.4e-09	0.002	0.5378	-1.005	0.315
rs4852252	2	71539301	T	C	0.4408	-6.191	5.99e-10	-0.004	0.1156	-1.606	0.1084
rs4925114	17	17711270	A	G	0.3656	-5.598	2.17e-08	-0.006	0.03312	1.475	0.1402
rs516902	1	96700020	T	C	0.6202	-6.078	1.22e-09	-0.001	0.776	-0.345	0.7302
rs527825	1	183340238	A	G	0.4198	-6.006	1.9e-09	0	0.9816	-0.516	0.606
rs55985762	14	89715495	A	T	0.2173	5.691	1.26e-08	0.007	0.019	-0.667	0.5049
rs56150095	7	71759069	A	C	0.5255	-5.697	1.22e-08	-0.012	1.15e-06	-1.135	0.2564
rs56151722	3	71482840	A	G	0.2565	-6.126	9.01e-10	-0.01	0.0008051	-0.863	0.3879
rs5758605	22	42541349	A	G	0.4533	-7.302	2.83e-13	-0.005	0.03725	2.027	0.04262
rs59663815	2	68473755	T	G	0.6851	-5.775	7.71e-09	-0.01	0.0001266	0.263	0.7922
rs61104616	5	88163771	A	G	0.5186	-6.344	2.25e-10	-0.016	6.039e-11	1.384	0.1662
rs6124077	20	59815020	A	G	0.4799	-5.491	4e-08	-0.008	0.0008649	-0.65	0.5155
rs61544985	7	127102681	A	G	0.4087	-6.753	1.44e-11	-0.004	0.1074	-2.073	0.03817
rs62037363	16	28865042	T	C	0.61	8.88	6.71e-19	0.014	4.365e-08	2.442	0.01459
rs62047280	16	61582586	A	G	0.2216	6.205	5.47e-10	0.011	0.0001741	0.708	0.4787
rs62236533	22	41992169	A	G	0.1059	5.511	3.58e-08	0.008	0.06005	0.574	0.5662
rs62253086	3	85393815	T	G	0.8912	5.628	1.83e-08	0.01	0.01481	-0.733	0.4638
rs62358087	5	107170148	A	G	0.8259	5.564	2.64e-08	0.01	0.0021	-1.138	0.2553
rs62439690	7	21417556	A	G	0.2569	-6.33	2.44e-10	-0.011	6.142e-05	-0.023	0.9815
rs66886492	6	28089731	T	C	0.104	7.943	1.98e-15	0.003	0.4658	-0.028	0.9773
rs6760964	2	73387386	C	G	0.6113	6.27	3.6e-10	0.005	0.02907	-0.129	0.8974
rs6778735	3	52565100	T	C	0.4491	-7.894	2.93e-15	-0.005	0.03442	2.369	0.01786
rs6819372	4	67970101	A	G	0.4722	-6.297	3.03e-10	-0.007	0.007685	-0.479	0.6319
rs7010173	8	13969304	T	C	0.6019	6.634	3.27e-11	0.003	0.2406	0.674	0.5004
rs7038525	9	23772277	T	C	0.1787	-5.929	3.05e-09	-0.013	7.325e-05	1.089	0.2759
rs704444	3	64880377	A	G	0.5382	-5.572	2.51e-08	-0.003	0.1628	-0.188	0.8508
rs71413877	2	100924822	A	G	0.0401	5.967	2.42e-09	0.036	1.453e-08	0.925	0.3551
rs7186834	16	7673255	T	C	0.5752	5.859	4.66e-09	0.008	0.001575	0.912	0.3617
rs72801843	16	53508802	A	T	0.294	6.969	3.19e-12	0.009	0.0008311	1.221	0.222
rs73189617	3	184069126	C	G	0.7114	-5.979	2.24e-09	-0.006	0.0304	0.324	0.7462
rs7365380	1	173625710	T	C	0.5239	5.475	4.39e-08	0.005	0.03045	-1.002	0.3163
rs743134	20	14804964	A	G	0.3781	-6.64	3.14e-11	-0.009	0.0004161	-1.538	0.1241
rs74370218	17	57095212	T	C	0.3729	-7.638	2.21e-14	-0.007	0.01029	-1.589	0.1122
rs74796574	2	155654998	T	C	0.9531	-5.726	1.03e-08	-0.024	0.0001463	-1.463	0.1434
rs7487854	12	50150266	T	G	0.0742	5.476	4.35e-08	0.021	2.591e-05	1.714	0.08649
rs74944275	5	102726073	T	C	0.0435	5.609	2.04e-08	0.021	0.001116	0.569	0.5693
rs750472	8	145701453	A	C	0.4968	-6.544	6e-11	-0.014	5e-08	-2.924	0.003453
rs7534501	1	96221514	A	G	0.468	-6.12	9.35e-10	-0.012	1.033e-06	2.174	0.02971
rs7583067	2	100796850	T	C	0.2394	7.332	2.27e-13	0.021	4.43e-13	1.866	0.06202
rs7590388	2	101042122	T	G	0.4771	-5.864	4.52e-09	-0.014	1.503e-08	-0.201	0.8407
rs7599488	2	60718347	T	C	0.4316	-5.897	3.71e-09	-0.017	2.046e-11	1.603	0.1089
rs7609050	2	156021862	A	C	0.4755	-7.743	9.71e-15	-0.005	0.04926	-0.369	0.712
rs7618519	3	49772708	A	T	0.4925	-9.587	9.11e-22	-0.021	7.643e-17	-3.599	0.0003195
rs7633520	3	23966425	T	G	0.2782	-7.43	1.09e-13	-0.007	0.01621	-0.19	0.8494
rs7699872	4	166195670	A	T	0.4039	-5.555	2.77e-08	-0.006	0.02873	-1.159	0.2465
rs77482156	6	25199853	T	C	0.9467	-6.362	1.99e-10	-0.007	0.2477	-1.411	0.1584
rs7763264	6	21960065	T	C	0.3711	-5.487	4.1e-08	-0.006	0.01689	1.415	0.1571
rs78066960	7	127716892	A	G	0.3014	5.79	7.04e-09	0.004	0.1729	-0.618	0.5369
rs7814022	8	118902809	A	C	0.5648	5.756	8.59e-09	0.008	0.00119	2.106	0.0352
rs7873907	9	92225483	T	C	0.4988	5.99	2.1e-09	0.008	0.0007427	2.649	0.008069
rs79245415	6	98323549	C	G	0.8738	-7.616	2.61e-14	-0.017	7.93e-05	-0.385	0.7002
rs79582714	1	20883608	T	C	0.0977	6.32	2.61e-10	0.017	2.349e-05	0.433	0.6648
rs7963801	12	79685226	T	C	0.4165	7.738	1.01e-14	0.009	0.0005772	1.071	0.2841
rs7978070	12	14511806	T	C	0.5184	5.551	2.84e-08	0.016	4.334e-10	0.482	0.63
rs7998050	13	58473866	A	G	0.3014	-5.558	2.72e-08	-0.019	5.642e-12	0.222	0.8241
rs80170948	5	64020316	T	G	0.9583	5.805	6.44e-09	-0.008	0.2416	2.13	0.03313
rs830386	5	165479749	A	C	0.2385	6.263	3.77e-10	0.003	0.355	0.401	0.6881
rs889956	2	57404834	A	G	0.39	-5.452	4.97e-08	-0.011	7.076e-06	-1.365	0.1723
rs909674	22	39859169	A	C	0.7447	5.624	1.87e-08	0.003	0.2314	0.404	0.6864
rs9295486	6	20896553	T	C	0.5733	-5.685	1.31e-08	-0.005	0.03243	0.361	0.7179
rs935116	15	87973743	A	G	0.6248	-5.555	2.78e-08	0.001	0.6414	0.888	0.3748
rs9384679	6	108864419	T	C	0.379	-7.629	2.36e-14	-0.009	0.000234	-6.179	6.468e-10
rs9451649	6	92049630	T	C	0.6092	5.457	4.83e-08	0.005	0.03363	1.293	0.1961
rs9467777	6	26534616	A	C	0.461	-6.149	7.79e-10	-0.01	7.227e-05	-0.679	0.4972
rs9477970	6	19082663	A	T	0.187	5.903	3.57e-09	0.015	4.563e-06	2.379	0.01736
rs9489945	6	98311875	C	G	0.4069	-6.329	2.47e-10	-0.014	5.958e-08	-1.925	0.05419
rs9520384	13	89016992	A	G	0.3134	-5.828	5.62e-09	-0.006	0.02919	-0.046	0.9636
rs9541479	13	69221551	T	C	0.4657	-5.463	4.69e-08	-0.006	0.009245	0.642	0.5207
rs9597254	13	56325337	A	T	0.6868	-6.817	9.31e-12	0	0.918	0.212	0.8323
rs9916613	17	28682453	A	T	0.3584	5.459	4.78e-08	0.006	0.02996	-1.046	0.2957
rs9921412	16	71988106	T	C	0.7364	6.789	1.13e-11	0.008	0.006085	-1.815	0.06959
rs9934041	16	7229579	T	C	0.3469	-6.125	9.06e-10	-0.004	0.08739	0.435	0.6637
