# Supplementary material for: Genetic variation underlying cognition and its relation with neurological outcomes and brain imaging
Source: Aging (Albany NY). 2019 Mar 4;11(5):1440–56. doi: 10.18632/aging.101844 (PMC6428100; doi:10.18632/aging.101844)
Supplement: Supplementary Table S2 [file aging-11-101844-s003.xlsx]

## Sheet: Sheet1
Supplementary Table S2. P-value thresholds for the association with educational attainment and intracranial volume, and corresponding number of genetic variants remaining, as well as the explained variance for the G-factor.
Threshold p-value for the association with educational attainment and intracranial volume	Number of variants remaining	Explained variance G-factor
No threshold	170	0.00656
P>5e-8	149	0.00593
P>1e-7	146	0.00607
P>1e-6	144	0.00594
P>1e-5	135	0.00507
P>1e-4	121	0.00431
P>1e-3	101	0.00299
P>0.01	70	0.00186
P>0.05	36	0.00062
