# Supplementary material for: Genetic variation underlying cognition and its relation with neurological outcomes and brain imaging
Source: Aging (Albany NY). 2019 Mar 4;11(5):1440–56. doi: 10.18632/aging.101844 (PMC6428100; doi:10.18632/aging.101844)
Supplement: Supplementary Table S3 [file aging-11-101844-s004.xlsx]

## Sheet: Sheet1
Supplementary Table S3. Association of polygenic risk scores and individual genetic variants with cognitive tests, daily functioning and years of education.
	Model 1 (adjusted for age and sex)																														Model 2 (adjusted for age, sex and years of education)
Determinant	Beta.G-factor	P.G-factor	Beta.Letter-digit substitution task	P.Letter-digit substitution task	Beta.Stroop 1	P.Stroop 1	Beta.Stroop 2	P.Stroop 2	Beta.Stroop 3	P.Stroop 3	Beta.Verbal fluency test	P.Verbal fluency test	Beta.Purdue pegboard test both hands	P.Purdue pegboard test both hands	Beta.Purdue pegboard test right hand	P.Purdue pegboard test right hand	Beta.Purdue pegboard test left hand	P.Purdue pegboard test left hand	Beta.15-word verbal learning test immediate recall	P.15-word verbal learning test immediate recall	Beta.15-word verbal learning test delayed recall	P.15-word verbal learning test delayed recall	Beta.Mini-Mental State Examination	P.Mini-Mental State Examination	Beta.Basic activities of daily living	P.Basic activities of daily living	Beta.Instrumental activities of daily living	P.Instrumental activities of daily living	Beta.Years of education	P.Years of education	Beta.G-factor	P.G-factor	Beta.Letter-digit substitution task	P.Letter-digit substitution task	Beta.Stroop 1	P.Stroop 1	Beta.Stroop 2	P.Stroop 2	Beta.Stroop 3	P.Stroop 3	Beta.Verbal fluency test	P.Verbal fluency test	Beta.Purdue pegboard test both hands	P.Purdue pegboard test both hands	Beta.Purdue pegboard test right hand	P.Purdue pegboard test right hand	Beta.Purdue pegboard test left hand	P.Purdue pegboard test left hand	Beta.15-word verbal learning test immediate recall
Polygenic score no threshold for the developmental component	0.0767916	1.17519e-13	0.074694	1.0686e-10	-0.0327743	0.00204579	-0.0421019	1.96535e-05	-0.0367321	2.535e-05	0.0804639	2.73443e-10	0.0306244	0.00634138	0.0208431	0.0686654	0.0210109	0.067958	0.0567853	9.26392e-06	0.0585463	6.46149e-06	0.054964	6.96305e-08	0.0156309	0.248006	-0.0136414	0.316041	0.289379	4.27239e-07	0.0635696	5.36278e-09	0.0654554	1.31916e-07	-0.0258298	0.0218129	-0.0396842	0.000109654	-0.0297677	0.00112494	0.0702526	5.89344e-07	0.0251926	0.0433113	0.0149172	0.244147	0.016402	0.204874	0.0461464
Polygenic score P>5e-8 for the developmental component	0.0750594	3.43489e-13	0.0670627	6.07751e-09	-0.032025	0.00251271	-0.0368109	0.000182206	-0.036831	2.2873e-05	0.0768526	1.54064e-09	0.0315124	0.00486104	0.0207229	0.0693718	0.0241472	0.0354949	0.0504369	8.01057e-05	0.0574147	9.34488e-06	0.0497395	1.02489e-06	0.0111631	0.40855	-0.00412491	0.761365	0.220799	0.000118348	0.0646889	2.69933e-09	0.0596809	1.45345e-06	-0.023738	0.0349341	-0.0349004	0.00066567	-0.0311395	0.00064946	0.06847	1.13068e-06	0.0287005	0.0211447	0.0132403	0.300295	0.0186331	0.149412	0.0445389
Polygenic score P>1e-7 for the developmental component	0.0758426	2.03557e-13	0.0677232	4.39683e-09	-0.0314803	0.00298569	-0.0386505	8.55611e-05	-0.0381387	1.16795e-05	0.0771528	1.33717e-09	0.0338742	0.00247089	0.0223701	0.0499548	0.025962	0.0237895	0.0495257	0.000109131	0.0558066	1.68081e-05	0.0502094	8.10047e-07	0.00767831	0.569528	-0.00682188	0.615434	0.207304	0.000309147	0.0665981	1.00812e-09	0.0613476	7.7297e-07	-0.0230847	0.0406655	-0.0375358	0.000258786	-0.0330007	0.000309994	0.0691918	9.09394e-07	0.0320237	0.0102404	0.0148	0.247726	0.0207202	0.109543	0.0430344
Polygenic score P>1e-6 for the developmental component	0.0737901	9.73984e-13	0.0647903	2.08474e-08	-0.0312886	0.00321784	-0.0374143	0.000147041	-0.0357283	4.15838e-05	0.0739778	6.52116e-09	0.0347843	0.00190865	0.0231953	0.042389	0.0278119	0.0155798	0.0476172	0.000202701	0.0535831	3.6766e-05	0.0501453	8.73691e-07	0.00730021	0.589235	-0.00614361	0.651523	0.198873	0.00055523	0.0653517	2.1691e-09	0.0588158	2.24206e-06	-0.0225549	0.045877	-0.0366221	0.000373316	-0.0318934	0.000501988	0.0673172	1.84115e-06	0.0311626	0.0125913	0.014416	0.260896	0.0220709	0.0886916	0.0437553
Polygenic score P>1e-5 for the developmental component	0.0679345	5.18218e-11	0.0599197	2.18774e-07	-0.0295039	0.00546698	-0.0364554	0.000216567	-0.028774	0.000964966	0.0705689	3.15154e-08	0.0407239	0.000280072	0.0270625	0.017853	0.0312507	0.00658293	0.0407206	0.00148281	0.0469573	0.000297815	0.0420532	3.77715e-05	0.00958488	0.478767	-0.00629583	0.64366	0.160864	0.00522412	0.0600812	3.62944e-08	0.0546323	1.08289e-05	-0.0216606	0.0547962	-0.035112	0.000633258	-0.0263893	0.00393481	0.0660383	2.79799e-06	0.0379493	0.00234974	0.0199679	0.118814	0.0247874	0.0555951	0.0383252
Polygenic score P>1e-4 for the developmental component	0.0602211	7.27226e-09	0.0535532	3.90484e-06	-0.0251964	0.0182015	-0.0320076	0.00122816	-0.0206555	0.0184116	0.0705512	3.60896e-08	0.0341191	0.00246597	0.0250888	0.0287184	0.0247562	0.0323432	0.0383055	0.00293549	0.0392586	0.00262607	0.0390466	0.0001383	0.00919617	0.498863	-0.00913882	0.503648	0.157116	0.00671448	0.0533301	1.25586e-06	0.0487456	9.44617e-05	-0.0224965	0.0476712	-0.0314632	0.00237081	-0.0209412	0.0231385	0.0660438	3.19981e-06	0.0347593	0.00568049	0.0218403	0.0898077	0.0216849	0.0966422	0.0350314
Polygenic score P>1e-3 for the developmental component	0.0502552	1.2968e-06	0.0484855	2.84354e-05	-0.0225191	0.0342957	-0.0281536	0.00435829	-0.0196352	0.0246486	0.0570307	8.05543e-06	0.0228108	0.0422989	0.0204139	0.0745196	0.026519	0.0214542	0.0334564	0.00914819	0.0356326	0.00614738	0.0397462	0.000100305	0.000169919	0.989995	-0.0064299	0.63718	0.166904	0.00386912	0.0396357	0.000301359	0.0380044	0.0022936	-0.0170204	0.133116	-0.0259907	0.0118463	-0.0125466	0.172579	0.0513652	0.000284194	0.0220389	0.0784022	0.0174571	0.173987	0.0233228	0.0728977	0.0285345
Polygenic score P>0.01 for the developmental component	0.0411605	6.28662e-05	0.0373795	0.00110202	-0.0111287	0.290018	-0.0196788	0.0438259	-0.0141872	0.100475	0.0499765	7.45296e-05	0.0238191	0.031855	0.0218511	0.0534554	0.0155701	0.171803	0.0221074	0.0819926	0.0258539	0.0447178	0.0289965	0.00405459	-0.00688287	0.608296	-0.00936263	0.486526	0.122173	0.0333296	0.0310429	0.00452999	0.0274253	0.027027	-0.00265919	0.813498	-0.0159324	0.120934	-0.00901407	0.324549	0.0437465	0.00187341	0.0210654	0.0904907	0.0161096	0.207005	0.00617115	0.633072	0.0169823
Polygenic score p>0.05 for the developmental component	0.0236423	0.0213189	0.0123986	0.279997	-0.0113156	0.282999	-0.0178758	0.0676736	-0.00853903	0.3239	0.0529672	2.91525e-05	0.0143843	0.19514	0.0124215	0.272395	0.00356995	0.75428	0.0111788	0.379021	0.01388	0.281068	0.00817261	0.419641	-0.0128664	0.337435	0.00647815	0.631172	0.0110031	0.847727	0.0188806	0.0817186	0.00907641	0.462586	-0.00800433	0.475907	-0.0175883	0.0856593	-0.00572784	0.529753	0.0509635	0.000289509	0.01618	0.191091	0.0135701	0.285263	0.00110992	0.931273	0.00612431
Polygenic score for educational attainment	0.0668877	1.00167e-10	0.0678526	4.78444e-09	-0.0346051	0.00118445	-0.0343744	0.000520633	-0.0339208	0.000107487	0.0639445	5.53256e-07	0.0211358	0.0597688	0.0146977	0.199793	0.0172906	0.133441	0.0566902	1.02508e-05	0.0570766	1.17522e-05	0.0527127	2.5613e-07	0.0254809	0.0605611	-0.0129769	0.342202	0.322228	1.85291e-08	0.0550915	4.07631e-07	0.0616218	6.92679e-07	-0.0300497	0.00786652	-0.0322575	0.0017458	-0.0281638	0.00214799	0.0539788	0.000128005	0.0131457	0.291749	0.00845832	0.509265	0.0151409	0.241926	0.0478521
rs10145335	0.0405979	0.0147424	0.0373245	0.0459053	-0.036157	0.0350854	0.00723729	0.649625	0.00611122	0.664451	0.0791232	0.000120891	0.0170949	0.344894	0.0179412	0.331264	0.0266149	0.151645	-0.000197336	0.992381	0.0032944	0.874987	0.0335306	0.0419557	0.0190091	0.38539	0.0139404	0.525947	0.178376	0.0545935	0.041024	0.0191577	0.0350844	0.0797223	-0.0273391	0.132652	0.0189967	0.251723	0.0189248	0.19976	0.0700385	0.00206736	0.0294515	0.142666	0.036528	0.0766385	0.0370049	0.0758787	0.000561132
rs10514301	0.0267803	0.223175	0.023055	0.347534	0.0150538	0.505916	-0.0366985	0.0806203	-0.0209963	0.258287	0.02825	0.296386	0.0152194	0.522196	-0.00490324	0.839878	-0.0032709	0.893492	0.02654	0.329699	0.00274661	0.920703	-0.0182449	0.400784	-0.00588758	0.838721	-0.00400616	0.889825	0.0901197	0.459856	0.0193179	0.401419	0.0234313	0.371278	0.00485183	0.839094	-0.0291656	0.180511	-0.00474074	0.806904	0.0283737	0.341485	-0.00166355	0.94967	-0.000110858	0.996732	0.000501837	0.98538	0.018577
rs10761765	0.0199013	0.29027	0.00669144	0.749403	0.00634509	0.742384	-0.000581602	0.974109	-0.0257027	0.104796	0.0216207	0.349761	0.0327701	0.106198	0.00139231	0.946336	0.0309763	0.137111	-0.0130886	0.57506	0.00649737	0.783609	0.00560486	0.761779	-0.022585	0.356459	0.0147354	0.549963	0.0535822	0.601354	0.0288103	0.140194	0.0252194	0.254175	-0.00663706	0.742029	-0.00520662	0.776964	-0.0223102	0.172799	0.0109504	0.663632	0.0336991	0.12886	0.0221071	0.331803	0.0391491	0.0895058	-0.00547031
rs10786662	0.0238165	0.108503	0.023761	0.152052	0.00376331	0.805049	-0.00817057	0.563771	-0.00585544	0.63997	0.0200163	0.273802	0.00928047	0.56397	0.0284826	0.0821743	0.0119413	0.469568	0.0366845	0.0455792	0.0194744	0.295021	0.0122734	0.402562	-0.036527	0.0603268	-0.00453592	0.81657	0.0957351	0.24437	0.00577999	0.710209	0.00985371	0.578247	0.0125568	0.435572	0.00176511	0.9043	0.0141626	0.278605	-0.00238089	0.90595	0.00842139	0.636208	0.0289389	0.113134	0.0194031	0.293673	0.0200998
rs10798879	0.0295813	0.052136	0.0452983	0.00792366	-0.0198446	0.205538	-0.0123339	0.396712	-0.0312954	0.0150016	0.00620524	0.741515	0.00966101	0.55841	0.00862694	0.608585	0.00561944	0.740513	0.0274184	0.147016	0.00388807	0.839259	0.0328877	0.0289593	-0.0036034	0.856952	0.00108129	0.957116	0.0572147	0.496941	0.0184859	0.246825	0.0367789	0.0428912	0.00395062	0.811349	-0.0083457	0.580157	-0.0155157	0.248102	-0.00134175	0.948206	0.00545578	0.764424	0.00859525	0.64594	-0.00164668	0.930655	0.0180832
rs10806984	-0.0243287	0.115367	-0.0278756	0.106592	0.0146654	0.355107	0.0220774	0.133699	0.00685176	0.598721	-0.0277571	0.144334	-0.0093772	0.575421	-0.0396001	0.0202644	-0.039848	0.0204404	0.00175495	0.926901	-0.00250778	0.897089	-0.0188894	0.215746	-0.00442816	0.826828	0.0211391	0.29918	-0.0206699	0.810304	-0.0211938	0.192848	-0.0357802	0.0535066	0.0267307	0.112207	0.0181384	0.237094	-0.00254765	0.852095	-0.0238539	0.256553	-0.0045766	0.805808	-0.0278469	0.144932	-0.0357019	0.0647658	0.0135185
rs10875914	-0.000375578	0.979904	0.0169733	0.306868	0.0145461	0.342332	0.000157417	0.991168	0.0237071	0.0595035	0.0387547	0.0343138	-0.0204796	0.203505	-0.0235652	0.151505	-0.0194747	0.238743	0.00326022	0.859884	0.000205517	0.99124	0.0102632	0.484374	0.00603021	0.757242	-0.0201064	0.304418	0.0610229	0.458126	-0.0114475	0.463151	0.0123896	0.483568	0.0150165	0.353761	0.0116385	0.430443	0.0298046	0.0233195	0.0337782	0.093174	-0.0282854	0.111196	-0.0290887	0.110718	-0.0215945	0.241897	0.0038957
rs10996430	0.0115086	0.488762	-0.0080227	0.666813	-0.00554611	0.745334	-0.00908986	0.566351	-0.0300006	0.0323021	0.0221133	0.282036	-0.0198129	0.27259	0.000395982	0.982869	-0.00589861	0.750411	0.00788115	0.702404	-0.000596906	0.977218	-0.00302737	0.854321	0.00716822	0.742129	-0.0276095	0.209709	0.134081	0.147747	0.0123135	0.480695	-0.0127723	0.521647	-0.0115885	0.521216	-0.00389559	0.813004	-0.0185293	0.206361	0.0344069	0.128916	-0.0285938	0.153031	0.00331995	0.87172	-0.011476	0.581063	0.00956685
rs11126396	0.000850723	0.958108	-0.0180526	0.317878	0.0113155	0.496033	0.0119666	0.438043	-0.0031352	0.818458	-0.0159381	0.424638	0.0196954	0.261628	0.0187756	0.294142	0.0414192	0.0214066	0.00956698	0.632903	0.0181055	0.372352	0.00300163	0.850815	-0.00861227	0.68296	0.029276	0.168622	-0.0829399	0.356638	0.00806298	0.63585	-0.0151456	0.434548	0.0170318	0.334043	0.0202849	0.206879	-0.00658648	0.6454	-0.0112275	0.610756	0.0176542	0.364851	0.00762628	0.703017	0.0527665	0.00907166	0.0155729
rs111342015	0.00100847	0.967521	-0.0115191	0.676784	0.0164413	0.518154	-0.000397038	0.986589	-0.00245595	0.906379	-0.00853544	0.780234	0.00431662	0.871853	-0.019174	0.482188	0.00820065	0.765479	-0.0114437	0.709323	0.0282292	0.364275	-0.0148522	0.543853	-0.0550173	0.089035	-0.0349571	0.283688	-0.300873	0.0288431	0.021417	0.41219	0.0129595	0.6622	0.0045323	0.866681	-0.0116581	0.635702	0.00174712	0.936457	0.0122803	0.716895	0.00596337	0.840915	-0.0242421	0.426782	0.0172234	0.57704	-0.0150422
rs111599092	-0.00242799	0.925118	0.00487594	0.866659	0.00749213	0.779307	0.00160118	0.948563	0.0073124	0.738961	0.0280125	0.382374	-0.0112684	0.688118	-0.0319966	0.264102	-0.0514951	0.0743213	0.0149513	0.642567	0.0141171	0.665449	0.0253009	0.325163	-0.0389012	0.255942	-0.0229863	0.503175	0.233918	0.108004	-0.0235116	0.388969	0.00341005	0.913197	0.0478307	0.0925685	0.0345613	0.182465	0.0259094	0.261714	0.0121548	0.732732	0.00475381	0.879487	-0.0385584	0.231378	-0.0528173	0.105281	0.0132294
rs11168951	-0.0064758	0.820069	0.0447773	0.160174	0.00655431	0.823068	-0.0155855	0.566809	0.0233418	0.331898	-0.00123796	0.971926	0.0113684	0.713243	-0.000730165	0.981581	-0.00216437	0.945647	-0.0515143	0.143612	-0.0315658	0.376501	0.0245287	0.385452	-0.00200207	0.95757	-0.0234877	0.53345	0.27705	0.0820809	-0.0226054	0.451443	0.0324278	0.343453	0.0211319	0.498431	0.0101151	0.722239	0.0188976	0.455783	-0.00814174	0.834482	-0.0249635	0.467839	-0.0236006	0.504251	-0.0314775	0.377947	-0.0592967
rs112780312	-0.0122229	0.473769	0.0290592	0.128118	-0.0102254	0.559523	0.0244865	0.132211	0.0298138	0.0381653	-0.0179098	0.393884	-0.0255416	0.167372	-0.0136898	0.467329	0.000427304	0.982068	-0.015942	0.450294	-0.0336304	0.116027	-0.00292799	0.862004	-0.0132225	0.555418	-0.00301777	0.89314	0.0204028	0.829701	-0.00293939	0.869859	0.0245893	0.229701	-0.0137616	0.459097	0.013477	0.426396	0.0339845	0.0242577	-0.00274844	0.905714	-0.00422357	0.836718	0.00881363	0.675208	0.0191287	0.36943	-0.0223106
rs113714691	0.00915034	0.70844	0.018737	0.495149	-0.00146892	0.953343	0.0147514	0.526769	0.0132537	0.520211	-0.0269771	0.370489	0.0417798	0.115338	0.0134698	0.618877	0.0416231	0.12699	0.0301437	0.318611	0.0444028	0.147073	-0.0169934	0.482574	-0.0128674	0.687972	0.0245895	0.446307	-0.11131	0.417185	0.00457176	0.85987	0.00431054	0.884616	-0.010245	0.701984	0.006133	0.801593	0.00312364	0.885717	-0.0411418	0.21908	0.0516388	0.082226	0.024708	0.418049	0.0569375	0.0653426	0.0097044
rs11628208	0.0202987	0.177437	0.00741989	0.658038	-0.0158419	0.304897	-0.0117425	0.412678	-0.0103199	0.415789	0.0407243	0.0276466	-0.00128196	0.937099	-0.0131886	0.425562	0.00291481	0.861362	0.00696199	0.708717	0.0180253	0.339812	-0.0206907	0.162036	-0.00629411	0.74874	-0.0170274	0.388485	0.175365	0.0354886	0.00705583	0.656013	-0.00110794	0.950853	-0.0246446	0.132819	-0.0198101	0.185037	-0.00974874	0.463908	0.029039	0.155603	-0.010152	0.573311	-0.0243589	0.187725	-0.0127587	0.496134	-0.00478676
rs11662271	0.0227883	0.126186	0.0231867	0.162748	-0.0117237	0.442731	-0.0227641	0.108346	-0.0157361	0.209652	0.0207385	0.257763	0.0139391	0.386684	0.0148386	0.366117	0.0148851	0.367652	0.0229391	0.213516	0.0275012	0.141135	-0.00185352	0.899368	-0.011638	0.550223	-0.01841	0.346637	0.0448977	0.586887	0.0319905	0.0416192	0.0231085	0.19415	-0.011663	0.472518	-0.0205627	0.164654	-0.017177	0.192374	0.0296199	0.143469	0.0117162	0.512284	0.0165649	0.366741	0.0270217	0.145564	0.0281555
rs11678106	-0.00349046	0.816077	-0.00570065	0.733854	-0.00230413	0.881082	-0.0131416	0.358021	-0.00434509	0.731183	-0.00139024	0.940104	-0.00833792	0.607513	-0.00497968	0.763453	-0.00172695	0.917475	0.00225615	0.903333	0.0105164	0.576514	0.0017083	0.908125	-0.0263106	0.17975	0.0296471	0.133065	-0.0739233	0.375578	-0.00475781	0.763311	-0.011301	0.529463	-0.00399149	0.80734	-0.0119799	0.422004	0.00621926	0.639785	0.00203505	0.920813	-0.0113659	0.528199	0.00601061	0.745141	-0.00579341	0.757008	-0.00337278
rs11720236	0.0629014	0.0016222	0.0618224	0.0056565	-0.0474146	0.0214363	-0.0480965	0.0119521	-0.0490579	0.00373139	0.0666317	0.00675177	-0.0079607	0.712495	-0.00209468	0.924356	-0.00830509	0.708366	0.0232184	0.349314	0.0132421	0.598354	0.0365219	0.0643268	0.0382907	0.145036	-0.00363046	0.890337	0.128637	0.247403	0.0557627	0.00786048	0.0510799	0.0328517	-0.0413615	0.0585811	-0.022228	0.264911	-0.0369577	0.0373425	0.0660555	0.0150145	-0.00725233	0.762209	-0.00529926	0.829685	0.00150059	0.952003	0.00434105
rs117431198	0.00880849	0.840297	-0.0115978	0.813119	0.013039	0.771687	-0.0112756	0.786931	0.0122148	0.740464	-0.0143087	0.792268	0.0440002	0.355076	0.0499056	0.303193	0.0822335	0.0919294	-0.0210609	0.696552	0.0240142	0.660759	-0.0780259	0.0714022	-0.062013	0.278511	0.0736817	0.201692	-0.0184805	0.939877	0.0185225	0.688849	-0.00945675	0.857627	-0.00397418	0.933923	-0.0586398	0.179526	0.0074241	0.84867	-0.00804174	0.89394	0.0867127	0.101107	0.0827756	0.126576	0.117349	0.0329374	0.0367462
rs11759522	0.00436983	0.774361	0.00519328	0.759767	-0.0153337	0.327596	-0.036255	0.01263	-0.016824	0.190689	0.00556313	0.766875	0.00465079	0.778128	0.00101245	0.952013	-0.00570751	0.73627	-0.0204657	0.279062	-0.00897653	0.639388	0.00954997	0.524239	0.00606355	0.761181	-0.00311525	0.876299	0.251237	0.00291327	-0.0149589	0.349951	-0.0165207	0.363603	0.0083209	0.616292	-0.0280617	0.0636929	-0.00729703	0.588229	-0.00257802	0.900895	-0.00353501	0.846605	-0.0138862	0.458794	-0.00575256	0.762046	-0.0453677
rs117793008	0.0728234	0.0269193	0.0394092	0.278647	-0.0166287	0.621903	-0.0165871	0.596182	-0.0784488	0.00471848	-0.00367689	0.927121	0.0112118	0.750179	0.00557343	0.876554	-0.00574638	0.873768	0.0541887	0.183877	0.081911	0.0473935	0.0440549	0.170061	-0.0148225	0.723513	0.0823487	0.0540755	0.0237037	0.895281	0.0655477	0.0577012	0.0641151	0.0990385	-0.0223252	0.532386	-0.0215806	0.507905	-0.0435349	0.133575	-0.0105239	0.811946	0.0159214	0.682969	-0.00652534	0.870359	-0.00978243	0.809279	0.0612525
rs11793831	-0.00648803	0.672288	0.0089135	0.604882	0.0043093	0.785454	0.0200318	0.172812	0.010464	0.420664	-0.00463261	0.807274	-0.0109327	0.511909	-0.0129744	0.445209	0.013243	0.439327	-0.0235064	0.216935	-0.0137677	0.475471	-0.00875235	0.565344	0.00344414	0.864901	0.000741425	0.970896	0.0414808	0.627012	-0.00710402	0.65877	0.0194642	0.289375	0.000467226	0.977686	0.0116777	0.443119	0.00524369	0.699055	-0.00986335	0.636746	-0.00234446	0.898756	-0.00527103	0.780549	0.0196491	0.304845	-0.0299448
rs11884495	0.0253378	0.0852561	0.0239447	0.144222	-0.028212	0.0625331	-0.00221559	0.874825	-0.00710138	0.568097	0.0211958	0.242119	0.0031135	0.844312	0.0098325	0.543107	-0.00218023	0.893538	0.00465594	0.798999	0.0234311	0.206102	0.0200789	0.165398	0.00915659	0.634512	-0.0456371	0.0181374	0.203196	0.012746	0.0243794	0.115672	0.0300152	0.0879424	-0.0233949	0.14542	-0.0190183	0.194172	-0.00878694	0.500556	0.024855	0.214153	-0.00930052	0.597818	0.00324421	0.857737	-0.00887156	0.62835	0.00197087
rs11896887	0.0131178	0.38275	0.0134769	0.421982	0.00779797	0.613842	-0.0121806	0.39585	0.00885985	0.485161	0.0363346	0.0500949	0.0113857	0.483314	0.00110272	0.94693	0.0109217	0.512817	0.0115993	0.534119	0.0190502	0.313621	-0.00113321	0.93904	0.0220305	0.261012	-0.0166843	0.39865	-0.119035	0.153507	0.0284088	0.0724845	0.0241184	0.179412	0.00376825	0.817909	-0.017045	0.253221	0.0046836	0.724521	0.0505651	0.0134799	0.0139013	0.440434	0.0248671	0.178666	0.0186888	0.318477	0.0140249
rs11970030	-0.00611387	0.800095	0.0105582	0.695172	-0.0199354	0.420736	-0.00527442	0.818512	-0.00413125	0.83891	0.0335988	0.257683	-0.0392403	0.132991	-0.0159148	0.550169	0.00600129	0.822853	-0.014983	0.616267	-0.0201599	0.505735	0.0156047	0.511857	0.0193654	0.538483	0.00666546	0.83353	0.0240459	0.856171	-0.00494963	0.844717	0.0124752	0.663346	-0.00784415	0.763911	-0.00995915	0.675704	-0.0155028	0.464592	0.0375658	0.24834	-0.0573198	0.0459119	-0.0247579	0.401613	-0.0229948	0.440913	-0.0106252
rs12438326	-0.0026462	0.861578	-0.0110813	0.514481	-0.0231068	0.138425	-0.00105937	0.941674	-0.000615467	0.961672	0.010048	0.592043	-0.000126955	0.993856	-0.0017081	0.919037	0.00878567	0.603781	-0.00410203	0.827431	-0.0243117	0.202267	-0.00110894	0.941112	-0.00824997	0.680266	-0.0137044	0.493602	-0.121959	0.148994	-0.00231693	0.884549	0.000839424	0.9632	-0.016856	0.307392	0.00731082	0.627228	0.00535552	0.68965	0.00621861	0.763431	0.00334618	0.854694	0.00412665	0.825835	0.00717062	0.70549	0.00179735
rs12441495	0.0401376	0.0844466	0.0228854	0.37606	-0.0110789	0.642197	-0.0438864	0.0473696	-0.0252384	0.197504	-0.00280259	0.922067	0.0152234	0.543366	0.0355471	0.164233	0.0233102	0.364819	0.0456674	0.112718	0.0737474	0.0114866	0.0404997	0.0761888	0.0104264	0.731302	-0.0227463	0.454368	-0.00740935	0.953788	0.0593119	0.0144187	0.0455157	0.0976636	-0.0258586	0.303441	-0.0346252	0.130591	-0.0329216	0.106483	0.0165661	0.598009	0.0452421	0.100879	0.0595576	0.0353391	0.0364156	0.204014	0.0590822
rs12485060	-0.00752087	0.612189	0.0016605	0.920228	0.0173043	0.256096	0.0223487	0.114093	0.0176727	0.157655	-0.0304111	0.0959766	-0.0168876	0.292666	0.00101647	0.95049	0.00127218	0.938453	0.019381	0.292325	0.0141047	0.449507	-0.0185396	0.206355	0.0082053	0.67497	0.00935437	0.632554	-0.10444	0.205334	-0.00172129	0.91209	-0.000614498	0.972369	0.00272898	0.865731	0.00658995	0.654207	0.00569122	0.664024	-0.0216014	0.283389	-0.0272289	0.125844	-0.00144409	0.936992	0.00767328	0.677953	0.0236614
rs12646225	-0.0506571	0.0370895	-0.0571362	0.0341929	0.0291792	0.241391	0.0239924	0.299446	0.0279786	0.171234	-0.0547555	0.0664862	0.0288	0.270894	-0.00322641	0.90387	-0.0142853	0.594686	-0.0273931	0.361402	-0.0344583	0.257168	-0.0372482	0.116372	0.00303767	0.923879	0.0397566	0.208973	-0.0471483	0.725285	-0.0428523	0.0945714	-0.0486933	0.0926645	0.0479773	0.071203	0.0286359	0.237528	0.0224736	0.297873	-0.0352245	0.288161	0.0351337	0.227747	0.00559678	0.851765	-0.00740418	0.806663	-0.0270025
rs12707116	0.00686064	0.640022	-0.00177333	0.913654	0.0139436	0.354636	0.00514121	0.71315	-0.0174201	0.158749	0.00143331	0.936762	-0.00436216	0.783321	-0.00202335	0.900506	0.00321702	0.843356	-0.00171096	0.925012	0.0156579	0.395231	0.0164162	0.255894	0.0162266	0.3983	0.0147029	0.445125	-0.0595735	0.462758	0.0194263	0.205957	0.000907335	0.95862	0.0130901	0.410673	-0.00417162	0.773643	-0.0151366	0.241161	0.00850606	0.668758	-0.000710401	0.967709	0.0098217	0.585788	0.0127861	0.482961	0.00635697
rs12713315	0.0115056	0.464918	0.0339555	0.052955	0.000100189	0.995061	0.00556967	0.710885	-0.00702669	0.59693	-0.0134775	0.486907	0.0247034	0.146855	0.00085192	0.960893	0.0355467	0.042053	-0.0113125	0.561393	0.00437017	0.824776	0.0163902	0.290317	0.0206173	0.316316	-0.0131623	0.524034	0.0124268	0.886413	0.0102295	0.536376	0.0324115	0.0837513	-0.00179162	0.916721	-0.00121795	0.937844	-0.00955768	0.491973	-0.0188001	0.378623	0.0265996	0.158408	0.0038919	0.84073	0.0270736	0.16716	-0.00823543
rs12918191	0.00156633	0.929173	0.00723277	0.712594	0.0284159	0.114901	0.0215207	0.198405	0.00883388	0.55052	0.0258365	0.232556	-0.0324247	0.0889661	-0.0216756	0.264745	-0.0351241	0.0725409	0.0203996	0.347815	-0.00491569	0.823449	-0.0143436	0.408218	-0.0105714	0.645921	-0.0486345	0.0353118	0.143271	0.141383	-0.011528	0.534431	0.014376	0.493888	0.0180982	0.3445	0.0251527	0.149481	0.0177095	0.254466	0.0248147	0.299521	-0.045333	0.0317978	-0.0330975	0.126836	-0.0418312	0.056542	0.010298
rs13062354	0.0127312	0.383026	0.0105961	0.516548	0.00675641	0.652977	0.00235766	0.865788	0.00410919	0.739005	0.0100397	0.578052	0.00536621	0.734384	0.0183333	0.255664	0.00195054	0.904352	0.00744232	0.681457	0.0308639	0.0929642	0.00884289	0.540064	-0.0289732	0.130084	-0.0145031	0.451222	0.0769964	0.34538	0.0095276	0.536113	0.0158166	0.367408	-0.00118613	0.940799	-0.00210017	0.8853	0.00340791	0.792698	0.00205971	0.917937	-0.00389138	0.824916	0.0266125	0.140691	0.00724136	0.691615	0.00640445
rs13107325	0.0345698	0.341258	0.0571935	0.157951	-0.0629375	0.0904503	-0.044162	0.200688	-0.018502	0.544261	0.0431325	0.33264	-0.0231099	0.556064	0.0199965	0.616733	-0.00471758	0.906893	0.00710784	0.87441	0.0210773	0.643657	0.078928	0.0272474	0.00883302	0.855427	-0.093843	0.0494394	-0.434863	0.0340252	0.0186784	0.632926	0.0519927	0.239912	-0.0134259	0.738393	0.0226815	0.535931	-0.0151642	0.642124	0.0465823	0.353212	-0.0295395	0.506646	0.0120955	0.790403	-0.0275847	0.550394	-0.00449842
rs13146981	0.0110359	0.458487	-0.00998965	0.547596	-0.0214454	0.161001	-0.0207285	0.144438	-0.0191042	0.128371	-0.00371844	0.839497	0.0160106	0.319921	0.0272534	0.0967372	0.00568905	0.730818	0.0241945	0.189571	0.0241273	0.196651	0.000919776	0.950001	0.015141	0.438076	-0.00108358	0.955863	0.0837578	0.307744	0.0106219	0.494901	-0.0268185	0.129438	-0.0127244	0.430067	-0.0157118	0.285114	-0.0179157	0.171042	-0.000961706	0.961959	0.0276195	0.119849	0.0238957	0.189646	0.0112195	0.543421	0.0279861
rs1318878	0.0196344	0.276273	0.0350808	0.0815518	-0.0300042	0.105702	-0.011207	0.515139	-0.0217206	0.15374	0.00315805	0.887136	-0.011695	0.548842	-0.00470053	0.813222	-0.020383	0.309191	0.0348126	0.120132	0.0325313	0.151782	0.0473071	0.00780383	0.00135697	0.954278	-0.0210187	0.375931	0.277061	0.00621062	0.00231622	0.903996	0.0278071	0.201813	-0.0191268	0.336673	-0.00495103	0.784999	-0.00394886	0.806987	-0.0239387	0.335251	-0.012716	0.561183	-0.0211807	0.345614	-0.0212829	0.349339	0.025243
rs13262595	0.0244205	0.0969969	0.0355902	0.0303794	0.0153332	0.31034	-0.00300752	0.830281	-0.0183856	0.138687	0.0218224	0.228478	0.00675491	0.671797	0.0193084	0.234834	0.0175153	0.284565	0.0172953	0.34201	0.0163645	0.374894	0.0256294	0.0774587	0.00624405	0.74579	-0.0288644	0.136154	0.0658441	0.421146	0.018257	0.239076	0.0246751	0.161534	0.0321057	0.0454252	0.0152912	0.295958	-0.0178036	0.171831	0.00339272	0.865568	-0.00578437	0.74387	0.0123765	0.495613	0.0206665	0.261195	0.0270364
rs13278931	0.0131725	0.362274	0.0171274	0.29034	0.00753448	0.612577	-0.000198007	0.988562	-0.00606382	0.619644	0.0118899	0.505445	0.0186046	0.235841	-0.00372615	0.815971	-0.00216245	0.893344	0.0425365	0.017586	0.0197523	0.276651	0.00219373	0.878174	0.0268612	0.156187	-0.0183764	0.335588	0.111753	0.164035	0.015938	0.293494	0.0163123	0.346271	0.00483401	0.758586	-0.0103673	0.469612	-0.0155042	0.224547	0.01747	0.374316	0.0158659	0.361714	-0.00994396	0.577735	-0.0110289	0.541823	0.0409187
rs13425585	-0.00961282	0.521128	-0.00018696	0.991074	-0.0104888	0.496341	0.0121693	0.395223	0.0268715	0.0336989	0.000563399	0.975687	0.0073861	0.648912	0.0108618	0.511415	-0.0206672	0.214817	-0.0230308	0.214768	-0.0264857	0.159271	-0.00353645	0.810943	0.036217	0.0648698	0.00577683	0.769438	-0.196016	0.0177144	-0.0155293	0.321542	0.00389199	0.826866	-0.0191114	0.239061	0.0049551	0.737743	0.017489	0.184386	-0.0106153	0.600649	0.00943801	0.598093	0.0093761	0.610124	-0.0177385	0.340468	-0.018103
rs13428598	0.0216965	0.152338	0.0249756	0.139943	0.0112707	0.468534	-0.0160849	0.265112	-0.0145778	0.253696	0.0177603	0.341807	0.022385	0.172042	0.00523365	0.754571	0.00117844	0.944209	0.0346689	0.0644399	0.0221504	0.243713	0.00704662	0.636828	0.000856981	0.965501	-0.0398025	0.0453952	0.177606	0.0333231	0.00955272	0.547157	0.0150159	0.404733	0.0146341	0.371747	-0.0109788	0.462275	-0.00451378	0.734413	0.00836944	0.68316	0.0228736	0.205757	-0.00170502	0.926923	-0.0113774	0.544949	0.0402288
rs1343700	0.0198511	0.194923	0.0147819	0.388676	0.000678784	0.965679	-0.00745462	0.610721	-0.012875	0.320111	-0.00563624	0.765963	0.0193881	0.243039	-0.0127443	0.451841	0.0315019	0.0649499	0.0113723	0.550521	0.0298689	0.121715	0.00441515	0.771138	-0.00772602	0.700262	-0.000857255	0.966218	-0.0466541	0.585868	0.0137223	0.395379	0.0144239	0.433092	0.00444706	0.790904	-0.00740214	0.628284	-0.000257719	0.984897	-0.00217282	0.91737	0.0221898	0.228895	-0.0026011	0.890812	0.0193131	0.314164	0.0155179
rs1343775	0.0350499	0.0455882	0.0251699	0.197608	-0.00254079	0.887103	-0.0137613	0.407486	-0.0425603	0.00375493	0.0391108	0.068964	-0.0152433	0.420678	-0.0279808	0.14691	-0.0180471	0.353243	0.0513431	0.0175617	0.0350442	0.109986	0.0248846	0.148981	-0.00839447	0.714573	-0.0196369	0.39374	0.181758	0.0600661	0.0343858	0.0616031	0.0298664	0.151946	0.00691623	0.71495	-0.0141852	0.411209	-0.0359321	0.0193719	0.0292982	0.215779	-0.0217297	0.29861	-0.0320171	0.135635	-0.0230145	0.289254	0.0397176
rs1363119	0.00160384	0.914835	-0.0106551	0.524811	-0.00235548	0.878592	-0.0120905	0.398313	-0.0129477	0.306388	0.000898967	0.961229	0.000362942	0.982127	-0.00219257	0.894418	0.033551	0.0438515	0.0137102	0.460994	0.00277808	0.882793	0.0364349	0.013725	0.0165935	0.399701	-0.0180318	0.360764	0.102626	0.219621	-0.00665995	0.674369	-0.00957951	0.594541	-0.0024175	0.882853	-0.0108805	0.466881	0.000551039	0.967001	-0.00708773	0.729201	-0.00273694	0.879441	-0.00185729	0.920121	0.028457	0.129261	0.0208125
rs1408579	0.0125765	0.385744	-0.0139842	0.388791	-0.0170582	0.251778	-0.0233508	0.0910183	-0.0259711	0.0335727	0.0142552	0.425141	0.011508	0.464465	-0.0119668	0.455246	0.0207913	0.197963	0.00109884	0.951249	-0.000599192	0.973758	0.0112094	0.434324	-0.00346289	0.856032	0.0176921	0.355326	0.131914	0.103338	-0.00330497	0.829184	-0.033422	0.055213	-0.0118068	0.456378	-0.0147352	0.307829	-0.0120606	0.348687	-0.00169084	0.931968	0.0166884	0.340588	-0.0211833	0.238162	0.0294607	0.105344	-0.0103836
rs1428472	0.0047022	0.766059	-0.0151374	0.388182	0.00507759	0.753568	0.00444257	0.767321	-0.00433122	0.744476	-0.00067204	0.972293	0.0220893	0.194088	0.0306373	0.0773335	0.0163067	0.350685	-0.00199821	0.918322	-0.00238504	0.903899	0.0339074	0.0286099	0.0456483	0.0266385	0.0029623	0.885991	0.0549506	0.528411	0.00783226	0.637708	-0.0208956	0.265747	0.0178685	0.298095	0.00450958	0.773297	-0.000377075	0.978432	0.0104671	0.624309	0.00986299	0.600615	0.0257999	0.182275	0.0115647	0.554586	0.00157827
rs1473634	0.008016	0.611139	0.0202595	0.250897	0.00496749	0.759761	0.00872516	0.562869	-0.0163721	0.219528	0.0163516	0.401498	-0.0115092	0.500287	-0.0148635	0.393252	-0.00560281	0.749606	0.0257304	0.188373	0.0142432	0.472431	0.000203245	0.989587	0.020986	0.311978	0.0236272	0.255062	-0.0777725	0.375784	0.0196361	0.236399	0.0409886	0.0303311	-0.0150945	0.381115	0.00406142	0.796011	-0.023776	0.0891931	0.0175226	0.41602	-0.0117619	0.535269	-0.0145066	0.456332	0.00227349	0.908311	0.0358128
rs1541102	0.0290621	0.0562295	0.0147927	0.384843	0.00420526	0.788083	-0.0194088	0.181383	-0.0271545	0.0345355	0.0221676	0.238531	-0.00412219	0.802354	-0.0177179	0.291246	0.010429	0.537423	0.0480911	0.0108261	0.0414862	0.0300559	0.0126413	0.399999	0.00482175	0.808818	0.0194681	0.331393	0.00893224	0.916287	0.0293359	0.068442	0.011192	0.54101	-0.0161936	0.3315	-0.0299749	0.0485739	-0.027139	0.0449461	0.0214029	0.305083	0.000999303	0.956563	-0.00547081	0.771285	0.0152651	0.423296	0.0397206
rs1699462	0.00960564	0.515617	0.00756152	0.647805	-0.0203084	0.181108	-0.00403947	0.774481	0.00287036	0.817998	0.0076955	0.672671	-0.00397705	0.804246	0.0139981	0.392192	-0.0077422	0.63846	0.00470087	0.797252	0.0128369	0.48874	0.00253897	0.861895	0.00864609	0.656129	-0.0326854	0.0931638	-0.0402761	0.624474	0.0117173	0.452083	0.01128	0.525059	-0.0187134	0.246029	-0.00954886	0.516126	-0.000105337	0.993584	0.0149721	0.457428	-0.00243592	0.891356	0.00941373	0.607099	-0.0159911	0.388065	-0.0021806
rs1702877	0.00935047	0.560324	0.023645	0.188285	-0.039635	0.0161938	-0.0142396	0.352205	0.00177709	0.895582	-0.00111369	0.955129	0.00646179	0.709847	0.011646	0.510994	-0.00841893	0.636751	0.0240965	0.225289	0.0128912	0.522075	0.0097034	0.540276	-0.00661797	0.753169	-0.0048886	0.816959	0.10083	0.256883	-0.00484062	0.774177	-0.00622166	0.746042	-0.0265391	0.127957	-0.00327812	0.836607	0.00329303	0.816113	0.0021375	0.921945	-0.00518632	0.787496	0.0031062	0.875107	-0.0117357	0.556919	0.0241016
rs17032400	0.0011885	0.934815	0.00460613	0.776677	-0.00421141	0.778285	0.00665212	0.631891	0.00021439	0.986075	0.0127964	0.475549	-0.015672	0.31871	-0.00161582	0.919725	-0.0201418	0.212368	-0.0229901	0.202338	-0.0208435	0.253956	-0.0111663	0.436239	-0.0119061	0.532372	0.0313924	0.100884	-0.0609745	0.45272	0.00408576	0.789893	0.0127026	0.467544	0.00571063	0.71997	0.0154147	0.288391	0.000246541	0.98479	0.0193052	0.331921	-0.00869963	0.61932	0.00863491	0.631036	-0.00541088	0.766408	-0.018695
rs17251689	0.0149085	0.440684	0.0255955	0.237633	-0.0299158	0.132629	-0.011224	0.543381	-0.0190306	0.243925	0.0105469	0.659527	-0.0161805	0.441104	-0.00225032	0.916398	-0.0024389	0.909953	-0.0207837	0.386748	-0.015703	0.518703	-6.38063e-05	0.997346	-0.0210639	0.406116	-0.0513322	0.0447107	0.0275954	0.800479	-0.00609999	0.767544	0.0189449	0.420151	-0.00608765	0.776107	0.0025115	0.897585	-0.0119945	0.490001	-0.0212096	0.428299	-0.0272418	0.248269	-0.012589	0.60349	-0.00116218	0.962202	-0.0531223
rs17420654	0.00500987	0.753039	0.0139798	0.432083	-0.00169021	0.917588	-0.00685984	0.650997	0.0103345	0.440959	0.0210414	0.283338	0.0215952	0.210277	-0.00461451	0.792923	0.0111272	0.529654	-0.00195069	0.921204	0.00652884	0.743902	-0.00148846	0.92444	-0.00363339	0.862062	-0.044457	0.0338358	0.0430752	0.625538	-0.00695172	0.677174	-0.00755857	0.691408	0.0100217	0.561938	-0.00459806	0.770357	0.0255804	0.0681334	0.0218609	0.311554	0.00678456	0.722092	-0.0188001	0.33705	-0.00399359	0.840332	-0.00145385
rs17589603	-0.0100565	0.674979	-0.00305411	0.909595	-0.0169385	0.494524	0.0037941	0.869081	-0.0021178	0.917136	-0.0183587	0.53671	0.000276879	0.991488	0.0459005	0.0830788	0.00833828	0.754651	-0.017716	0.552955	0.00115558	0.969541	0.0254496	0.283861	0.0243507	0.441408	0.00103233	0.974017	0.0431582	0.744948	-0.00062663	0.979977	0.0109081	0.70237	-0.0270503	0.29876	-0.00214669	0.927925	-0.0078372	0.710802	-0.0119912	0.711927	0.0225876	0.42872	0.0501095	0.0875129	0.00873246	0.768667	-0.0184697
rs17663165	-0.000440325	0.976586	-0.0231416	0.166621	0.020594	0.180525	0.00959024	0.501769	-0.00344223	0.785118	0.0268258	0.146035	-0.00831631	0.608354	0.0102233	0.536832	0.00429771	0.796355	-0.0164433	0.375616	-0.0273962	0.145221	-0.0224739	0.128482	0.0099585	0.612937	-0.017429	0.37624	-0.0132882	0.872459	0.0299289	0.0566252	0.00826886	0.642945	-0.00375312	0.817312	-0.00461907	0.755125	-0.0289708	0.027986	0.0513941	0.0113251	-0.00194796	0.913358	0.0157631	0.390975	0.0164571	0.376076	0.00420744
rs1787003	0.018087	0.223817	0.0178678	0.282223	-0.0194038	0.204575	-0.0181189	0.20193	-0.0225784	0.072196	0.00331527	0.856835	0.0314923	0.0502926	0.0173529	0.290412	-0.00839919	0.611181	-0.00738567	0.688862	0.00231287	0.901541	-0.00680796	0.642719	-0.0285016	0.144276	0.00373954	0.848487	-0.0123597	0.881366	0.0131959	0.398534	0.0245999	0.167436	-0.00544875	0.737004	-0.0175895	0.234291	-0.0232439	0.0775161	-0.000606229	0.976198	0.0376	0.0351921	0.0165153	0.367574	-0.00100787	0.956679	-0.0161439
rs179994	0.0252692	0.0919397	0.00337556	0.839628	-0.0259607	0.0912118	-0.0458411	0.00130913	-0.0254935	0.043377	-0.0115561	0.530317	0.0396666	0.0141254	0.0403194	0.014444	0.0529906	0.00139694	0.0174937	0.345747	0.00866671	0.644794	-0.019899	0.17642	-0.00300008	0.87798	-0.0039642	0.839987	0.0718546	0.386878	0.0173622	0.270727	0.0039567	0.825065	-0.0268564	0.100038	-0.0522398	0.000445215	-0.017759	0.180375	-0.0188665	0.354093	0.0405883	0.0237269	0.0392279	0.0334234	0.0446943	0.0165051	0.0217275
rs1892423	0.0106909	0.469088	0.00286362	0.86247	0.0029572	0.84589	0.000503815	0.971545	0.000529478	0.966199	-0.00620013	0.733982	0.00618122	0.699106	0.001211	0.940797	0.0213563	0.194141	0.0190837	0.298151	0.0211065	0.256279	0.000273404	0.985087	0.00456125	0.813857	-0.0237439	0.223172	-0.081567	0.320811	0.00762229	0.623447	0.00691884	0.695423	-0.00725164	0.652556	0.000809848	0.956014	0.000124163	0.992423	-0.00459646	0.819189	-0.00381924	0.829291	-0.00748012	0.680766	0.0119978	0.515095	0.0334592
rs1895471	0.0107199	0.501439	-0.00419677	0.814372	-0.0103172	0.529697	-0.0231985	0.127914	-0.00544597	0.686248	0.0459262	0.0196713	0.00172105	0.920639	-0.0119874	0.496094	-0.00937804	0.596999	0.0220261	0.264729	0.0253534	0.205162	0.0371617	0.0185011	0.00123966	0.952642	0.073656	0.000461366	-0.0426624	0.631548	0.00395984	0.813463	-0.0189484	0.323614	0.0022302	0.898143	-0.0307086	0.0531035	-0.005464	0.699222	0.0321725	0.139722	0.0110207	0.565879	-0.00867449	0.659863	0.00493676	0.80452	0.0165182
rs1953522	0.00641765	0.675152	-0.00951081	0.57727	-0.0140562	0.371087	-0.0089017	0.541757	-0.011878	0.357512	0.00749779	0.69092	0.0163408	0.322992	0.0100218	0.552319	0.012978	0.444803	-0.0061089	0.74713	0.0148368	0.439799	0.0141869	0.346923	-0.0269826	0.178907	-0.0156243	0.43729	0.00497608	0.952757	0.00935302	0.556195	-0.00485107	0.788255	-0.0170042	0.300814	-0.00263324	0.860479	-0.00759256	0.569302	0.0156503	0.446361	0.0238203	0.18897	0.0170545	0.359851	0.0145223	0.440971	-0.00162076
rs2007481	0.0102507	0.509492	-0.00360952	0.83512	-0.0158157	0.321301	-0.0171798	0.245837	-0.0240986	0.0657832	0.0147065	0.441369	0.00518408	0.757792	0.0320879	0.0611181	0.0084594	0.623876	-0.000579625	0.97599	-0.0269959	0.166526	0.0326196	0.0332796	-0.0040349	0.843238	-0.0167127	0.413507	-0.108665	0.205375	0.00587022	0.71782	-0.00703189	0.703184	-0.0166209	0.323315	-0.0171433	0.263748	-0.0163035	0.232842	0.0104328	0.61931	0.0011199	0.951792	0.0270427	0.154951	0.0106643	0.579372	0.0121299
rs2077610	0.00376519	0.799047	0.00252021	0.878572	0.0194698	0.199254	0.00472702	0.737101	-0.00820693	0.510153	0.0158378	0.383775	3.8234e-05	0.998093	0.00887799	0.586202	0.00496963	0.762287	-0.0160781	0.379196	0.000719702	0.969011	0.00580693	0.68994	0.0122348	0.526698	-0.0315177	0.104494	0.0747054	0.361236	0.00748455	0.628718	-0.00264774	0.880564	0.0114007	0.477404	-0.00083717	0.95436	-0.0209099	0.108396	0.0210584	0.293154	-0.00349254	0.8436	0.00635103	0.726619	-0.00204748	0.911437	-0.0133363
rs2239647	0.0177335	0.22179	0.022476	0.165729	-0.034683	0.0198353	-0.0221052	0.109809	-0.0202406	0.0978411	0.00758461	0.67106	0.00289745	0.853659	-0.0291543	0.0687771	0.00861485	0.593429	0.029589	0.0996614	0.0128545	0.480328	0.0258713	0.0711378	0.0148487	0.43842	-0.0239875	0.209791	-0.0162332	0.83977	0.00805356	0.595482	0.0179489	0.298565	-0.0412748	0.00855255	-0.0328705	0.0216204	-0.0126271	0.322002	-0.00235796	0.904331	0.00755713	0.662707	-0.0249216	0.161373	0.0152282	0.397616	0.0130632
rs2284871	0.0376817	0.0159136	0.0352431	0.0424571	-0.0102704	0.520855	-0.0118556	0.424668	-0.0315209	0.016396	0.0416582	0.0296323	-0.00333487	0.843346	0.00626248	0.716197	0.00919494	0.595547	0.0604719	0.00169281	0.0385606	0.0482909	0.0039922	0.794321	-0.00997838	0.623662	0.0176541	0.38754	0.0203401	0.813701	0.0406422	0.0135238	0.0373847	0.044398	-0.0141413	0.404537	-0.0119985	0.437835	-0.0230114	0.0946733	0.0450683	0.0330541	0.00987392	0.598049	0.0193887	0.313481	0.0108989	0.57509	0.0563819
rs2333604	0.01025	0.495587	-0.0176354	0.293154	-0.0115506	0.453793	0.0021561	0.880272	-0.0124014	0.327271	0.00560435	0.761972	0.0103606	0.524505	0.00459963	0.781539	0.0152386	0.362033	-0.0144554	0.436815	0.016502	0.381089	-0.0026097	0.860157	0.0361296	0.0659597	0.0187897	0.341597	-0.0261556	0.754354	0.0132732	0.402397	-0.0136655	0.448114	0.0051783	0.751806	0.00389555	0.794093	-0.0147433	0.267259	0.00344731	0.86622	0.00945149	0.601721	-0.0109626	0.555003	0.00905576	0.630238	-0.0121591
rs2388334	-0.00775018	0.59515	0.00191304	0.906435	-0.00432023	0.773515	-0.00546029	0.695204	0.0100592	0.414564	-0.00937662	0.601612	-0.0122624	0.436105	-0.0273485	0.0887452	-0.0212444	0.189063	0.0180023	0.318378	0.014145	0.439067	-0.000291951	0.983793	0.0109581	0.567192	0.00475389	0.804116	0.081194	0.31555	0.00116516	0.939417	0.0156036	0.370643	-0.0181429	0.254628	-0.0227349	0.117317	0.00809256	0.531436	0.00060197	0.975785	-0.022734	0.192188	-0.0210621	0.239883	-0.0252262	0.164072	0.0214092
rs2420551	0.0161893	0.563558	0.0339685	0.277334	-0.0174487	0.542998	-0.0402624	0.130504	-0.021292	0.366197	0.0183453	0.595841	-0.0246173	0.416995	-0.0174521	0.572557	-0.00305757	0.921947	-0.0152845	0.659027	0.00504707	0.885658	-0.0143948	0.602694	0.0326264	0.37061	-0.0383278	0.297951	0.199509	0.198141	0.0179393	0.540271	0.0425112	0.202554	-0.0123315	0.683388	-0.0251808	0.360899	-0.028929	0.238475	-0.0071973	0.850009	0.00138093	0.967228	0.0160418	0.641724	0.0204632	0.558721	-0.0153223
rs2425161	-0.00285102	0.882441	-0.0156585	0.466269	0.0321461	0.104595	0.0138522	0.451286	-0.00565115	0.728729	0.00414698	0.861604	0.0176198	0.398045	-0.026575	0.211575	0.00398023	0.852563	-0.0197871	0.408201	-0.0106515	0.660403	-0.00619124	0.74413	0.00713594	0.775963	-0.0492684	0.0513145	-0.00387804	0.971121	0.0256867	0.205996	0.0129734	0.574009	0.0264366	0.208833	0.00613742	0.748932	-0.0135038	0.429627	0.0216635	0.410683	0.0285451	0.218121	-0.0192968	0.417626	0.0148225	0.53816	0.00410875
rs2426132	0.00641768	0.665402	0.0163332	0.324423	0.00063209	0.966901	-0.011051	0.434504	-0.00901641	0.470719	0.0157626	0.388896	-0.00233579	0.884538	-0.0105563	0.51971	-0.0239301	0.147047	-0.0180641	0.326066	0.0035073	0.850774	0.00589353	0.687238	0.0133197	0.49358	-0.0225356	0.248387	0.116119	0.160527	-0.00697892	0.655817	0.00885938	0.61944	0.00127196	0.937472	-0.0071045	0.630742	7.29263e-05	0.995579	-0.00337264	0.868056	0.00697787	0.696988	-0.00848265	0.644613	-0.0204891	0.270752	-0.0455341
rs2457192	0.0335364	0.0505343	0.0479559	0.0127894	-0.032761	0.063278	-0.0299907	0.0670368	0.000237433	0.986917	0.0394219	0.0631008	0.0151418	0.416865	0.0155143	0.414701	0.0121142	0.526973	-0.0187761	0.377365	0.0198157	0.357852	0.0303685	0.073532	-0.0186808	0.405203	-0.00107384	0.962132	0.0381039	0.689936	0.0356274	0.0486306	0.0629844	0.00228038	-0.00664978	0.722334	-0.0270109	0.113273	0.00272469	0.857646	0.0281306	0.229072	0.0298709	0.14925	0.00565311	0.790345	0.0135015	0.53026	-0.0227059
rs2478295	0.0285499	0.0826191	0.00925756	0.615499	-0.00511588	0.762295	-0.0163878	0.296596	-0.0156482	0.259958	0.0550296	0.00664301	0.041805	0.0192913	-0.00287455	0.874593	0.00211693	0.908125	-0.00165445	0.935279	-0.0169982	0.410289	0.0310677	0.0565901	-0.0353776	0.104306	-0.0153356	0.480885	-0.174676	0.0558347	0.0457454	0.00788781	0.0275361	0.161379	-0.0161439	0.366141	-0.0282767	0.0824333	-0.0304487	0.0357073	0.0675339	0.00245898	0.0449306	0.022904	-0.0115518	0.568788	0.00364242	0.859031	0.0158363
rs2726513	0.000509816	0.972716	0.00668293	0.688168	0.00731148	0.634198	0.0191253	0.179966	0.0121359	0.335968	0.00929406	0.614359	-0.0184389	0.254204	-0.00596744	0.717608	-0.0048989	0.767978	0.00771777	0.676829	0.0101343	0.58914	-0.000483973	0.973763	0.0160869	0.412247	0.0138087	0.481695	0.137043	0.0948438	-0.0172998	0.266247	-0.00774878	0.661049	-0.00103722	0.948783	0.0273901	0.0627064	0.0189865	0.147391	-0.00860449	0.669585	-0.0281971	0.11285	-0.013514	0.459218	-0.0143048	0.43868	0.00330544
rs2765042	0.0134807	0.378784	0.00691979	0.685582	-0.00636054	0.68683	-0.000372927	0.979686	-0.000660147	0.959372	0.0082116	0.663896	0.0206088	0.213065	0.00698165	0.679397	0.00546161	0.747943	0.00301145	0.874269	0.0121532	0.528558	-0.0100229	0.50654	-0.00768749	0.701656	-0.00270233	0.893209	-0.0269095	0.752093	0.00852298	0.597558	0.00831341	0.650226	-0.00301755	0.85722	0.00896308	0.557696	0.00234111	0.863467	0.00753989	0.718409	0.00712429	0.698672	0.00983321	0.603122	0.0050701	0.790967	0.0042514
rs2819336	-0.00853664	0.5757	0.00417593	0.805809	0.0184629	0.239194	0.00956488	0.511311	0.021629	0.0930981	0.012053	0.520492	-0.00195314	0.905367	-0.011905	0.477206	-0.00224476	0.894257	0.00757452	0.688509	0.00222159	0.90763	0.0182753	0.222512	0.0395429	0.0469848	-0.0150029	0.452756	0.185524	0.0276752	-0.0197396	0.217944	-0.00226503	0.900793	0.0291824	0.07916	0.017019	0.261415	0.0240084	0.0752212	-0.0031221	0.879995	-0.0116918	0.520484	-0.0245069	0.189458	-0.00108247	0.954377	-0.00852774
rs28549862	0.00747529	0.656546	0.0450158	0.0161249	0.0193998	0.25951	-0.0115757	0.468629	0.00265343	0.850998	0.0162195	0.4323	-0.0158819	0.382903	-0.01971	0.287898	-0.0284929	0.127125	-0.0384977	0.0633853	-0.0256786	0.221749	0.0107741	0.513471	0.0298126	0.171975	-0.0332923	0.129988	-0.225702	0.0154157	0.0117141	0.509842	0.047699	0.0178793	0.00885594	0.629188	-0.0191988	0.250777	-0.0015988	0.914481	0.0073721	0.747757	0.00227574	0.910686	-0.00841457	0.685981	-0.026276	0.211955	-0.0350137
rs28612284	0.0229679	0.713639	0.00579806	0.933528	0.0275155	0.66971	-0.0824171	0.1687	0.030124	0.570499	0.0775839	0.311799	0.0268548	0.689358	0.115787	0.0908277	0.14425	0.0371606	0.0308903	0.692464	-0.0447939	0.571353	-0.119762	0.0521674	0.172024	0.0353437	0.0543476	0.510183	-0.406751	0.23862	0.0653203	0.314579	0.0679487	0.359408	0.0013196	0.984475	-0.114067	0.0649444	0.0156966	0.77552	0.112462	0.181266	0.0343194	0.643351	0.131802	0.0837755	0.164944	0.0327223	0.068954
rs28657585	0.0350438	0.113498	0.0188696	0.446864	-0.0166018	0.467927	-0.0183094	0.388511	-0.0378697	0.0436801	0.0101219	0.71205	-0.00305369	0.898719	0.0045703	0.852005	-0.00045802	0.985177	0.0348516	0.205921	0.049164	0.0782256	0.0120556	0.582284	-0.0245834	0.399813	-0.00554018	0.849815	-0.0328216	0.790127	0.0375865	0.104931	0.0216281	0.414089	-0.0212272	0.378752	-0.0172485	0.432686	-0.0288074	0.141099	0.0333571	0.268484	0.00295642	0.911305	0.00499769	0.854579	0.0242837	0.37875	0.0407362
rs28892332	0.0991708	0.0085121	0.054283	0.197399	-0.0490345	0.206101	-0.0481251	0.181313	-0.0973905	0.00220446	0.0738417	0.112475	0.0232904	0.568091	0.0165414	0.690532	0.0364487	0.385263	0.0526985	0.258315	0.100429	0.0336667	0.0880388	0.0179921	0.0412521	0.400155	-0.0355257	0.474949	0.165095	0.428357	0.110564	0.00497116	0.0804158	0.0735893	-0.0630382	0.123002	-0.0754997	0.0427007	-0.109085	0.0010026	0.0855082	0.0951274	-0.00683775	0.879542	0.000710632	0.987749	0.0186138	0.691738	0.0697308
rs2906455	0.0135594	0.562769	0.0193622	0.460121	0.00657473	0.78539	-0.0276411	0.217477	-0.0120002	0.544926	0.0579088	0.0454624	-0.0398909	0.114948	-0.0199214	0.440826	-0.0209893	0.419565	0.0307558	0.28842	0.0224388	0.444788	0.0719647	0.0018866	0.0528574	0.0883837	0.0093825	0.761578	0.189019	0.144205	0.0284844	0.244081	0.0315404	0.258606	0.0065615	0.79632	-0.0254572	0.271915	-0.0300406	0.145386	0.0534291	0.0923981	-0.0573908	0.0393906	-0.0239174	0.403624	-0.0248166	0.391736	0.0468664
rs3092073	0.0138057	0.346901	0.0219898	0.181283	-0.000239172	0.987338	-0.00189641	0.892173	-0.0131758	0.286737	0.00979357	0.588957	0.00672892	0.67288	-0.000887793	0.956436	0.017975	0.272314	-0.0113554	0.532132	0.00771363	0.675372	0.0220695	0.128787	0.0147481	0.443761	0.00534106	0.782942	0.0186669	0.819173	0.0123227	0.423466	0.0116188	0.508577	0.00138822	0.930653	-0.00510542	0.725514	-0.00743753	0.565687	0.0098273	0.622965	0.000937341	0.957575	-0.0194278	0.282716	0.0098244	0.591929	-0.0021699
rs34172651	0.00820328	0.615386	0.0120607	0.508752	-0.00836087	0.61874	-0.0318781	0.0409272	-0.00732901	0.595162	0.0314806	0.118057	-0.0201584	0.254659	-0.0225202	0.212027	-0.0219444	0.227154	0.00627567	0.756468	0.0104416	0.610614	0.00780048	0.628539	0.0779272	0.000270785	0.0212056	0.3239	-0.0788117	0.381467	0.00989743	0.562299	0.0223081	0.250427	-0.00687096	0.697789	-0.0163466	0.310819	-0.00392321	0.784735	0.0238417	0.280141	-0.0249952	0.199739	-0.031939	0.110295	-0.0244561	0.227233	0.010503
rs34180096	0.00490282	0.747093	0.0121347	0.473729	-0.016722	0.282787	-0.00279581	0.846621	-0.00177287	0.889709	0.00647499	0.728918	0.00478559	0.770813	0.00654443	0.696207	0.00854093	0.612831	-0.0181183	0.335341	-0.0112641	0.554581	-0.0195878	0.190364	-0.00208668	0.916151	0.035344	0.0761862	0.216602	0.0101278	0.00246213	0.878136	0.00321444	0.859661	-0.00772464	0.641142	0.00124409	0.934368	0.00098017	0.941915	0.00624042	0.762922	0.00874881	0.631808	0.0166426	0.374573	0.0121576	0.521975	-0.0245615
rs34305371	0.0142276	0.612005	0.0463509	0.136388	-0.0533977	0.0648547	0.0141175	0.599083	-0.00684473	0.773269	-0.0038124	0.911271	0.0368393	0.218417	0.0476253	0.118827	0.0447193	0.145578	-0.00594601	0.864259	0.00753446	0.830708	0.0269148	0.325684	0.100503	0.00560962	-0.00136347	0.970202	0.281065	0.0646096	-0.00773137	0.790279	0.0279382	0.394763	-0.0578159	0.0560441	0.00900598	0.744099	-0.00526124	0.830427	-0.0173898	0.64025	0.00465174	0.887149	0.0422966	0.208913	0.0447338	0.188682	-0.0210226
rs34627	0.0225748	0.122612	0.0296065	0.0702684	-0.00796983	0.596755	-0.00279762	0.841438	-0.00567986	0.645954	0.0113838	0.528249	-0.0104734	0.508708	0.0184317	0.253995	0.0098277	0.545791	0.0157707	0.385501	0.0216333	0.240211	0.0208029	0.149579	-0.0122799	0.520216	-0.000501655	0.979236	-0.0289824	0.722398	0.0259237	0.0936554	0.0324005	0.0647446	-0.0179817	0.262393	-0.0138426	0.343913	-0.00840224	0.518829	0.0136178	0.495777	-0.00507478	0.773148	0.0210761	0.243225	0.00492229	0.787817	0.0159079
rs34811474	0.0527633	0.0295065	0.0528426	0.0508765	-0.0399476	0.110581	-0.026693	0.2508	-0.0351331	0.0873268	0.0505169	0.0910766	0.0419975	0.10889	0.0219333	0.412358	0.044813	0.0958414	0.025435	0.40029	0.0075094	0.806421	0.0383329	0.108752	-0.0364909	0.252211	-0.0345966	0.278477	0.0790633	0.554041	0.0566599	0.0250712	0.0692171	0.0160864	-0.0341982	0.193629	-0.0314707	0.189416	-0.0182743	0.392181	0.0558185	0.0882228	0.052443	0.0689753	0.0416182	0.160445	0.0493493	0.0996377	0.0450831
rs35891966	-0.00854721	0.833114	0.0351332	0.435002	-0.0104046	0.800649	0.0116219	0.76126	-0.0306863	0.364704	0.0713181	0.150351	-0.100635	0.0209655	-0.0922202	0.0379199	-0.0488263	0.274554	-0.0713664	0.153832	-0.0584657	0.249002	-0.0307119	0.438717	-0.0177394	0.734829	0.00538235	0.919024	0.00886016	0.968372	-0.0124178	0.769778	0.0402511	0.403868	0.0239092	0.582768	0.0283058	0.475551	-0.0406231	0.250222	0.0674531	0.217163	-0.133343	0.00586412	-0.108547	0.0286925	-0.0412837	0.410505	-0.0878981
rs36004779	0.0128443	0.517497	0.0226864	0.306121	-0.057202	0.00521677	-7.56567e-05	0.996826	0.00842155	0.61649	0.0190595	0.4371	-0.0355184	0.0970892	-0.00949936	0.663792	-0.0145097	0.509866	0.000327326	0.989424	0.0181174	0.469078	-0.0184829	0.34491	-0.00451347	0.860648	0.0599271	0.0216662	0.0353036	0.750613	-0.00526158	0.801515	0.00573966	0.810272	-0.0670887	0.00210404	-0.011716	0.556009	0.0114518	0.51809	-0.00214036	0.937396	-0.0479318	0.0452535	-0.0235411	0.338537	-0.0217686	0.382166	-0.00382561
rs36162392	0.00786382	0.741469	0.00390653	0.883686	-0.00997781	0.68226	-0.00199599	0.929705	0.0389907	0.0513704	0.0655279	0.025501	-0.0149752	0.562434	0.0354087	0.178506	-0.0133264	0.615595	-0.00196874	0.946658	0.0167482	0.574305	-0.0231043	0.325965	-0.0177116	0.573362	0.0141666	0.651503	-0.102127	0.441068	-0.00599163	0.810362	-0.00853219	0.765574	-0.00202544	0.937521	0.0218455	0.353659	0.0267555	0.202199	0.0469013	0.147857	0.00237617	0.933815	0.0239402	0.415074	-0.0357748	0.229638	-0.019257
rs3817334	-0.0110716	0.468699	0.00463977	0.784626	-0.0249342	0.111028	-0.0297765	0.0403491	-0.0224975	0.0800276	-0.00526244	0.77898	0.0118319	0.472219	-0.00682627	0.684161	-0.017287	0.306195	-0.0132927	0.481688	-0.0400445	0.0364321	0.00638265	0.67	-0.00404204	0.839449	-0.0100987	0.61329	0.109665	0.194218	-0.0113857	0.47839	0.00222697	0.90257	-0.0157711	0.342218	-0.0139818	0.355629	-0.010262	0.446495	0.000584976	0.977483	0.0194479	0.287192	-0.00645567	0.730714	-0.0122641	0.518261	-0.00933218
rs3850610	0.0353662	0.0326915	0.0273711	0.136471	-0.0279732	0.0990789	-0.0407311	0.0096678	-0.013437	0.334803	0.0291795	0.150698	-0.0159016	0.37325	-0.0104381	0.5666	0.00821645	0.654134	0.04073	0.0465439	0.0252275	0.223811	0.00680418	0.674928	0.00892186	0.678719	0.0134311	0.535153	0.000453841	0.996024	0.0286811	0.0986241	0.0307853	0.116777	-0.0190569	0.288693	-0.04291	0.00874699	-0.00347755	0.811496	0.0277302	0.215381	-0.0261785	0.184976	-0.028347	0.16196	-0.00218367	0.915277	0.0344688
rs3914453	0.00242555	0.869216	0.00259196	0.875163	0.0115911	0.444794	-0.0115375	0.412609	-0.0122443	0.325775	-0.0245341	0.177259	0.0139214	0.383317	0.00840938	0.60551	-0.0134031	0.41402	0.00236551	0.897056	0.0175206	0.34431	0.0142732	0.326881	0.0223956	0.248169	-0.0140449	0.469493	0.0468839	0.569608	-0.00400549	0.796986	0.00536768	0.762394	-0.00342365	0.832299	-0.0124662	0.397617	-0.0110747	0.398713	-0.0320324	0.111807	0.0107983	0.544411	0.00303951	0.867966	-0.0224632	0.225021	-0.00106777
rs39302	0.0244896	0.192833	0.0295678	0.161169	-0.0139849	0.470745	-0.0118074	0.511841	-0.00846057	0.595083	0.0216833	0.354266	0.0166721	0.414716	0.0128453	0.537912	0.0481084	0.0219917	0.0149509	0.522666	0.0130461	0.582019	0.0159631	0.392736	0.0525091	0.0342411	0.0510935	0.0401347	0.0843911	0.418535	0.0366519	0.0616815	0.0339541	0.130189	-0.00728864	0.720728	0.000746775	0.967949	-0.00953671	0.564463	0.0359632	0.160624	0.0260827	0.246571	0.0229153	0.321619	0.0497492	0.0335398	0.0185845
rs407102	0.0195693	0.249234	0.00507195	0.789631	0.0013648	0.937587	0.00810854	0.61628	0.00279661	0.84512	0.0261407	0.212607	0.0130339	0.478555	0.0120698	0.519567	0.0185555	0.326102	0.00896593	0.67091	0.0193649	0.365074	0.00617354	0.713113	-0.0316856	0.155306	-0.00263551	0.906313	0.0692024	0.463115	0.0136028	0.445716	0.00428404	0.833079	0.0110578	0.549411	0.00258459	0.878008	0.0101599	0.498042	0.0297803	0.198061	0.0156141	0.443545	0.0185694	0.374087	0.0158773	0.453404	-0.0121942
rs421211	0.0196738	0.176796	0.0312499	0.0553105	0.00216681	0.884962	-0.0131176	0.345399	0.0097204	0.429279	-0.00725755	0.686527	0.0101458	0.520287	-0.00130729	0.935276	0.000560018	0.972444	0.0321655	0.0750618	0.044049	0.0161507	0.00318686	0.824648	0.00477905	0.803284	-0.000793759	0.966991	-0.0420313	0.60189	0.0117037	0.442965	0.0215543	0.214722	-0.00175405	0.911568	-0.00670668	0.641321	0.0123977	0.333614	-0.00329863	0.867305	0.0060922	0.7266	-0.00806744	0.652092	-0.0158448	0.381476	0.0346915
rs424029	0.00613354	0.87861	-0.0265229	0.553407	0.00300434	0.94183	-0.0124702	0.744227	0.0285677	0.397812	0.013953	0.777279	0.047644	0.271847	0.0270014	0.541811	0.0422998	0.342687	0.0402583	0.42051	-0.0126893	0.802137	0.0204998	0.604502	-0.022313	0.676522	-0.0736545	0.163309	-0.305548	0.167011	-0.00441985	0.91563	-0.0212281	0.655298	-0.00118575	0.978065	-0.0179987	0.647059	0.0293768	0.401328	0.0106539	0.843592	0.0331231	0.488105	0.00417127	0.932247	0.0401208	0.419863	0.0271542
rs4294650	0.0214148	0.186092	0.00615569	0.733226	-0.0232731	0.162501	-0.0144341	0.350783	-0.0136633	0.317891	0.0197353	0.321668	0.00184474	0.915966	-0.00687383	0.699875	0.00245049	0.891407	0.0376075	0.0606088	0.0551926	0.0065672	0.00966047	0.544659	0.047785	0.0244038	-0.0140159	0.510184	0.0670388	0.4549	0.0201749	0.235836	0.00728512	0.706277	-0.0237999	0.177607	-0.0100446	0.532542	-0.0180122	0.208801	0.0134986	0.539045	0.00107484	0.955775	-0.00554477	0.780502	0.011465	0.569262	0.0375148
rs4636654	-0.0102344	0.497622	0.00469801	0.780254	0.0321448	0.0379618	0.0179245	0.21263	-0.00454686	0.720771	0.00242022	0.89653	-0.0102887	0.527998	0.00113187	0.945766	0.00745029	0.656573	-0.034864	0.0627136	-0.0367394	0.0529565	-0.026004	0.0802752	0.00359049	0.855487	0.022695	0.253157	0.0226966	0.785843	-0.00954013	0.546849	0.0161703	0.368413	0.0290029	0.0767251	0.0141388	0.343915	-0.00076727	0.954006	-0.00669588	0.743731	-0.0114835	0.524112	0.00131929	0.943222	0.00380661	0.839165	-0.0352182
rs4690029	-0.00693041	0.637513	-0.0176775	0.283428	-0.00489274	0.746153	0.01227	0.38184	0.0199222	0.108532	0.00383845	0.832434	-0.0137166	0.389797	-0.0297309	0.0675981	-0.00512727	0.754086	0.0116717	0.521849	0.020125	0.275777	-0.0156187	0.28245	0.00440848	0.818508	-0.00842092	0.663888	-0.0307215	0.706545	-0.00214615	0.889547	-0.00819306	0.641782	-0.00460578	0.77351	0.00278057	0.848842	0.0163851	0.207247	0.0164626	0.410316	-0.0076107	0.66643	-0.0293659	0.105337	-0.00506506	0.782309	0.0175992
rs4720476	0.0130588	0.400205	0.0208851	0.228586	-0.020473	0.199668	-0.0153791	0.29939	-0.015568	0.234771	0.0166002	0.386179	-0.00179407	0.914818	0.0119923	0.483595	0.0130374	0.449159	-0.0317634	0.0991116	-0.0156852	0.421657	0.019113	0.21241	-0.0327832	0.11001	0.0115456	0.572205	0.218204	0.0108166	0.012174	0.453201	0.0169629	0.358146	-0.00449209	0.78921	-0.0139509	0.362372	-0.0300335	0.0276141	0.0137448	0.512851	-0.00220276	0.905227	0.0015898	0.933374	0.0111081	0.563474	-0.0429751
rs4781499	0.0189511	0.357185	-0.00451152	0.844951	0.00563314	0.789304	0.0128253	0.512235	0.00872679	0.614255	0.0313335	0.218704	0.00744605	0.738213	0.0187214	0.409634	0.0241233	0.291211	0.027516	0.280348	0.006892	0.78963	-0.0175284	0.388531	0.0581211	0.0302041	0.0466878	0.0843406	0.0338095	0.765308	0.0367782	0.0873078	-0.00105922	0.965558	-0.00406765	0.854459	-0.000975397	0.961514	-0.00156933	0.930539	0.04166	0.135589	0.0251915	0.305573	0.0411906	0.102313	0.0454763	0.0745238	0.0508394
rs4852252	0.00199536	0.894492	0.0195586	0.245401	-0.0186549	0.227594	-0.00146497	0.918709	0.00577486	0.649261	0.00762544	0.68101	0.0116253	0.475951	0.00858955	0.605581	-0.000616448	0.970638	0.00181775	0.922293	-0.00227693	0.904025	0.00901868	0.543702	-0.0257473	0.191569	0.0078301	0.693019	-0.0266431	0.749581	-0.00539731	0.731506	0.00819405	0.648605	-0.0165096	0.31223	0.00495365	0.739427	0.0040607	0.759451	-0.00222898	0.91316	0.0111899	0.534487	0.00367683	0.842509	-0.00972213	0.60363	-0.0158704
rs4925114	0.00475618	0.755671	0.0174456	0.305684	-0.0307559	0.0501457	-0.0123938	0.395265	-0.00171691	0.894151	-0.010131	0.590574	0.0107647	0.514568	-0.0055264	0.742869	-0.000524103	0.975359	0.00871608	0.645384	0.0146057	0.446609	0.0360647	0.016522	0.000696798	0.972109	-0.0362828	0.0706279	0.119124	0.162767	-0.0182986	0.257832	-0.00279832	0.878945	-0.015029	0.369867	-0.0027602	0.856634	0.00521073	0.701714	-0.0405705	0.0526749	0.0015781	0.931842	-0.023777	0.209263	-0.00139409	0.942017	-0.00515421
rs516902	0.0129859	0.387442	0.0114704	0.494448	-0.0160538	0.298987	-0.0139304	0.331645	-0.00696615	0.583041	-0.0211985	0.252788	0.0494883	0.00229988	0.00628215	0.704515	0.0179435	0.28191	0.0206878	0.266183	0.0326424	0.0834306	0.014715	0.321108	-0.0419411	0.0338126	-0.0140614	0.477052	0.0858102	0.303586	0.00713036	0.652133	0.00155991	0.930826	-0.0117116	0.475365	-0.0192317	0.198473	-0.00696573	0.601019	-0.0302746	0.139044	0.0402189	0.0254905	-0.012415	0.501625	0.0220229	0.239203	0.0268416
rs527825	0.0146209	0.318425	0.0022173	0.892505	0.00509594	0.735309	-0.000200028	0.988595	-0.0149653	0.226582	0.0100999	0.576896	0.0144102	0.364206	-0.0160597	0.320864	0.0110684	0.497833	0.0203438	0.26387	0.0214689	0.244606	-0.0162987	0.261123	0.0105592	0.583273	0.0280401	0.147245	-0.0526652	0.51976	0.0164833	0.286768	0.0106092	0.546807	0.00481678	0.763662	-0.00634259	0.664043	-0.0127337	0.327417	0.0105665	0.59751	0.00942186	0.593958	-0.0138796	0.443799	0.0196453	0.285062	0.0183681
rs55985762	0.0204717	0.262552	-0.0047585	0.816397	-0.00228047	0.903475	-0.0116271	0.50537	-0.00528624	0.732019	0.00925351	0.681494	0.0238467	0.228211	0.0353628	0.0800035	0.0251291	0.216733	-0.0010091	0.964476	0.00676448	0.768283	0.0171105	0.344102	-0.0415537	0.0862095	0.0272474	0.258983	0.0424397	0.677974	0.016941	0.378503	-0.0161443	0.463355	0.00887713	0.65674	-0.00420503	0.817361	-0.00685195	0.672598	0.00696155	0.780478	0.0318699	0.147828	0.0392674	0.0827064	0.0375954	0.100673	-0.00221221
rs56150095	-0.000127907	0.99307	-0.00120164	0.941705	-0.00369636	0.807525	-0.00675868	0.631338	0.00498903	0.688846	-0.00535103	0.768231	-0.0176546	0.26761	-0.00907022	0.576883	0.00188709	0.908187	-0.00194051	0.915531	0.00836474	0.651866	0.0123058	0.397143	-0.0185873	0.335205	-0.0107766	0.578292	0.0656731	0.423607	-0.00611032	0.694553	0.002258	0.898396	0.00235793	0.883784	-0.0130327	0.375422	0.000312485	0.980966	-0.0130982	0.514921	-0.0191515	0.280789	-0.0183494	0.314528	0.00332225	0.857133	0.00178611
rs56151722	0.0145002	0.413455	0.00833824	0.673475	0.0374509	0.0398554	0.0356975	0.0348339	-0.00309219	0.836323	0.00738301	0.735186	0.0143033	0.455165	0.00721136	0.712274	-0.00431891	0.826183	-0.00888167	0.686253	-0.00770367	0.72953	-0.00621621	0.722519	0.0460872	0.0484953	-0.0287323	0.218413	0.0936464	0.341153	0.0201768	0.27867	0.0233954	0.268814	0.0240176	0.213051	0.0312745	0.0752448	-0.016074	0.304623	0.0128028	0.594851	0.00960033	0.650891	0.00183085	0.933086	-0.0125535	0.569098	0.0102538
rs5758605	0.0191269	0.215851	0.0167121	0.329877	-0.00213309	0.892682	0.00188017	0.898074	-0.00159616	0.902131	0.030159	0.110906	0.029919	0.0721254	0.0393699	0.020249	0.0346395	0.0426216	0.00516971	0.78669	-0.00101488	0.958185	0.0204549	0.176531	-0.0126016	0.530347	0.00851115	0.673317	-0.0301033	0.725049	0.014855	0.363416	0.00612642	0.739908	0.0122496	0.46715	0.00609827	0.691294	-0.000749606	0.956286	0.0425134	0.0427786	0.0308362	0.0964875	0.0404124	0.0337874	0.0309902	0.107962	0.00329686
rs59663815	0.00895237	0.595771	0.0146196	0.438098	-0.0193153	0.264338	-0.0151016	0.347193	-0.0271914	0.0556931	-0.00591249	0.776501	-0.0072319	0.692432	-0.00834106	0.654584	-0.0260157	0.16527	0.0125334	0.549139	3.97164e-05	0.998505	0.0163735	0.325382	-0.00545514	0.805943	0.0183831	0.408144	0.185617	0.0478035	-0.00367685	0.835788	-0.00487462	0.809347	-0.018726	0.307219	-0.0209446	0.210244	-0.0278957	0.0609291	-0.00912191	0.691446	-0.0195401	0.335578	-0.0148537	0.475958	-0.0357307	0.0895752	0.0011453
rs61104616	0.00534971	0.715132	0.0117281	0.474097	-0.00133332	0.92953	-0.0240208	0.0860692	-0.0239089	0.0533502	-0.000291341	0.987136	-0.0183397	0.247881	-0.0122724	0.448449	-0.00180061	0.911984	0.00611055	0.736369	-0.00354207	0.847293	0.00924574	0.522566	-0.00602919	0.752832	-0.000239209	0.990111	0.0848639	0.297247	-0.00423116	0.783632	0.000235442	0.989293	-0.00822723	0.606464	-0.0205948	0.157138	-0.02038	0.115974	-0.0129891	0.514508	-0.0187702	0.286333	-0.00723977	0.688752	0.011852	0.516842	-0.0114005
rs6124077	0.00385878	0.809412	0.0225401	0.206187	-0.00944076	0.565717	-0.0014896	0.922233	-0.00182727	0.892292	0.0160944	0.413542	-0.00963252	0.577789	-0.00506267	0.774174	-0.00715881	0.687091	-0.0265105	0.181573	-0.0156833	0.435594	-0.0235953	0.13475	-0.00252936	0.904238	-0.0034369	0.870292	0.0452531	0.607575	0.0064986	0.696335	0.0235403	0.213984	-0.0194332	0.260609	-0.00156903	0.920636	-0.0164968	0.239391	0.0178214	0.407991	-0.0177689	0.350861	0.00630423	0.747288	-0.00577556	0.770363	-0.0300277
rs61544985	-0.0200294	0.177568	-0.0308255	0.0622593	0.0234771	0.123691	0.0132349	0.349904	0.017844	0.154098	-0.00516592	0.777613	-0.00401512	0.802141	0.000479262	0.976606	-0.00507144	0.757887	-0.0094665	0.606276	-0.0299045	0.10822	-0.0103514	0.478448	-0.0237232	0.22032	-0.00498488	0.798006	0.121118	0.137635	-0.0214292	0.166655	-0.0253194	0.149465	0.0299911	0.0612538	0.0142719	0.328607	0.0294798	0.0234026	0.00016113	0.993577	-0.016429	0.351538	-3.8114e-05	0.998321	-0.0115367	0.528622	-0.0114233
rs62037363	0.018609	0.227751	0.0217944	0.206334	0.000985665	0.950453	-0.0210167	0.153473	-0.0253376	0.0517152	0.0491529	0.00970298	0.0200755	0.22938	0.0265946	0.118296	-0.00484016	0.778019	-0.00582273	0.76036	-0.0202059	0.296461	0.0350969	0.021023	-0.0229251	0.259143	-0.0314823	0.120665	0.104268	0.221568	0.0116425	0.471715	0.0111954	0.542973	-0.000803703	0.961769	-0.0121951	0.424904	-0.0206999	0.128206	0.0500462	0.0166023	0.0190475	0.301811	0.0299509	0.113709	-0.00970783	0.613103	-0.00873826
rs62047280	0.026198	0.159427	0.0257543	0.211689	-0.0209076	0.272788	-0.0272167	0.124074	0.00766404	0.624644	0.0166778	0.4655	0.022443	0.262415	0.0311744	0.127156	0.0319205	0.120526	0.00854959	0.710325	0.0238489	0.306536	0.00372911	0.837696	-0.0114421	0.63503	-0.0363069	0.134714	-0.0267799	0.794016	0.0399659	0.0409092	0.0220867	0.317125	-0.0223841	0.268249	-0.0435168	0.018186	0.00408469	0.803485	0.0182625	0.469214	0.0190238	0.391325	0.0240425	0.291658	0.0269235	0.242553	0.0251833
rs62236533	0.0187985	0.501366	0.018071	0.563081	0.02895	0.311102	0.0235226	0.375325	-0.00524084	0.823763	0.0579751	0.0926181	0.0382981	0.203024	0.0338402	0.270334	0.0239821	0.437747	-0.0169037	0.625022	-0.000841259	0.980848	-0.0169084	0.538063	0.0581582	0.106962	-0.00765489	0.834453	-0.161304	0.300885	-0.00389125	0.895198	-0.0142261	0.673302	0.0524687	0.0846935	0.0107219	0.699182	0.00182358	0.941165	0.0530519	0.166386	0.0412276	0.220345	0.0411319	0.233902	0.0246862	0.479903	-0.0305465
rs62253086	0.0331039	0.212521	0.0214458	0.467103	0.0194654	0.473482	-0.0298579	0.236224	0.0082795	0.710382	0.0319216	0.326536	0.00417558	0.8835	0.00197432	0.945814	0.0474082	0.105288	0.0564149	0.0862348	0.0343732	0.302293	0.0743557	0.00419182	0.0207647	0.548833	-0.00498151	0.885709	-0.327327	0.0260181	0.0484668	0.0840677	0.0371589	0.241669	0.00570674	0.844408	-0.0239699	0.3658	-0.00407481	0.862934	0.0600751	0.0979805	0.00401217	0.899671	-0.00537197	0.869339	0.0469773	0.156355	0.0830458
rs62358087	0.0081438	0.666468	0.00679111	0.747824	-0.00634006	0.743696	-0.0256275	0.154503	-0.0186678	0.24084	0.0119762	0.605901	-0.0226845	0.267465	-0.0163791	0.432586	0.0147596	0.481505	-0.0230716	0.323254	-0.0245866	0.298925	-0.0032162	0.862928	0.0025784	0.91725	-0.0158498	0.524034	0.149425	0.157567	0.000729285	0.970845	-0.00609214	0.789353	-0.00907927	0.660346	-0.0295377	0.11675	-0.0146397	0.382704	0.00667309	0.796144	-0.0354509	0.120887	-0.0101615	0.66525	0.0162318	0.494022	-0.0179156
rs62439690	0.0036577	0.8281	-0.0210332	0.262677	0.0131363	0.449105	0.0138429	0.390228	0.00538954	0.70524	0.000498943	0.980844	-0.00297089	0.870298	0.0211655	0.254323	0.0169243	0.36468	0.00304523	0.884151	0.0133289	0.529094	-0.00193344	0.907284	0.0191591	0.386918	0.00283984	0.897998	-0.17553	0.0624658	0.00759773	0.670534	-0.00881704	0.663476	0.0263149	0.156096	0.00963282	0.569015	0.00500517	0.739673	0.0127915	0.580175	-0.0024967	0.902339	0.0108844	0.602547	0.00963826	0.64823	0.0150504
rs66886492	0.0231679	0.331175	0.0151855	0.568765	-0.000823981	0.972988	-0.000384732	0.986412	0.0349923	0.0799054	0.0904897	0.00196816	-0.00651708	0.800625	0.0519472	0.0478807	-0.00548114	0.836197	-0.0130925	0.656418	0.0167763	0.573717	-0.0248966	0.289204	-0.0167397	0.592865	-0.0103863	0.740216	0.00279895	0.983144	0.0151508	0.545343	0.00566189	0.843062	0.0140956	0.585153	0.0199197	0.397392	0.0259387	0.216033	0.0802272	0.0130495	0.00952628	0.739414	0.0475694	0.105476	-0.0207368	0.486338	-0.0235186
rs6760964	-0.00570023	0.700817	0.000807431	0.961116	-0.0105945	0.487001	0.00855953	0.545227	0.00134675	0.914291	-0.0384365	0.0354764	0.00609888	0.703361	0.018793	0.249991	0.0110895	0.500377	0.00483435	0.792455	0.0011075	0.952567	-0.00729512	0.61754	0.00298902	0.878054	0.00787207	0.686321	0.00373135	0.963946	-0.00598539	0.702497	-0.00261444	0.882956	-0.00964402	0.551817	0.00489126	0.740592	-0.000586153	0.964467	-0.0347256	0.0860536	-0.000553295	0.975213	0.0129083	0.480206	0.0148892	0.421019	0.0223268
rs6778735	-0.00809206	0.589692	-0.00577396	0.73057	0.0189753	0.216937	0.0305011	0.0324963	0.0139108	0.270391	0.0105308	0.568786	-0.0110607	0.495936	-0.00385484	0.815921	-0.0197707	0.236049	0.00470821	0.79962	-0.00472267	0.801616	-0.0311049	0.0353351	0.0291726	0.138161	0.0237243	0.2287	0.012294	0.882629	-0.0229456	0.145996	-0.0160341	0.371938	0.0235179	0.14945	0.0280166	0.0595636	0.0247714	0.0613831	-0.00833674	0.683084	-0.0125514	0.486052	-0.00913072	0.621705	-0.0294941	0.115407	-0.0109963
rs6819372	-0.0101741	0.483385	0.00130165	0.935714	0.027504	0.0641451	0.00038854	0.977531	0.0152268	0.211938	-0.0175439	0.324143	0.0167999	0.28255	0.00429248	0.787871	0.00301954	0.85085	0.0179714	0.316819	0.00228912	0.899904	0.0301096	0.0345081	0.0321146	0.0901429	0.0101742	0.59268	-0.0152309	0.850343	-0.004467	0.771072	0.00772826	0.656582	0.0201443	0.203391	0.00255702	0.859428	0.00773358	0.547472	-0.0190239	0.335588	0.00433446	0.803662	-0.00140032	0.93766	-0.00376935	0.835202	0.0232144
rs7010173	-0.00708015	0.638576	-0.0093788	0.577311	-0.0198477	0.199773	0.002959	0.836871	-0.00632899	0.618664	0.00194683	0.916614	-0.0122595	0.452929	-0.00045383	0.978263	-0.0259534	0.121609	-0.00439567	0.813657	-0.00275389	0.884175	0.00207793	0.888868	-0.03674	0.0628756	0.01322	0.505345	-0.0164355	0.84406	-0.00195317	0.901644	-0.00339915	0.850099	-0.0194469	0.234447	0.0102952	0.489892	-0.00572568	0.666412	0.0103125	0.61454	-0.0112336	0.534414	0.000270273	0.988383	-0.0331756	0.0773395	0.00703701
rs7038525	0.0286518	0.127137	0.0308476	0.141673	-0.0543118	0.0050063	-0.0188377	0.294525	-0.0141442	0.373491	-0.0257036	0.267213	0.0213869	0.292505	-0.00601042	0.771986	0.0110787	0.595849	0.0137793	0.55503	0.0423735	0.0734683	0.012232	0.509672	-0.0192498	0.434673	-0.0100204	0.685514	-0.066278	0.530277	0.0255602	0.201033	0.0247226	0.276589	-0.0358494	0.0841257	-0.0177355	0.348614	-0.0127878	0.447916	-0.0364343	0.158497	0.0199056	0.38268	-0.0196817	0.400891	0.00609131	0.797304	0.0202771
rs704444	0.00317467	0.830339	0.0127714	0.440719	0.0074842	0.623071	-0.00717329	0.611837	0.00619285	0.620363	0.00651983	0.721326	0.0100534	0.530575	0.00465695	0.775835	0.017067	0.299674	-0.00369387	0.840724	-0.00643293	0.729816	0.0195779	0.180548	-0.00254699	0.895788	0.022692	0.244124	-0.0430586	0.600025	-0.00628426	0.685835	0.00620167	0.726258	0.0166992	0.299716	0.00293754	0.841394	0.0081113	0.534892	-0.0132499	0.510597	0.0142456	0.422028	0.0106326	0.55964	0.0258417	0.160956	-0.0184825
rs71413877	-0.0132149	0.768213	-0.00183868	0.970976	0.0284836	0.542025	0.00320133	0.941153	-0.0450705	0.239697	-0.0797719	0.156906	0.0229154	0.638181	-0.0529618	0.286715	-0.0311141	0.5354	-0.00573896	0.91889	0.0154056	0.787323	0.00667114	0.881735	0.0300688	0.614861	-0.000172849	0.997692	-0.0743615	0.767561	-0.000807094	0.986324	-0.00229558	0.966176	-0.0102	0.836824	-0.00838994	0.852566	-0.0335978	0.403258	-0.0653718	0.293038	0.0293003	0.587826	-0.000560249	0.991945	-0.0168988	0.764275	-0.000376378
rs7186834	0.0156637	0.289863	0.00993479	0.548682	0.00907743	0.551482	-0.00112171	0.936816	0.0187797	0.133541	0.0210338	0.250609	0.0378738	0.0180446	0.0324416	0.047193	0.0329555	0.0453253	-0.00914994	0.618753	0.002019	0.913741	-0.00446564	0.760061	-0.00936843	0.630087	-0.000987454	0.959627	0.0253271	0.757942	0.0201995	0.191859	0.0178509	0.312423	-0.0022291	0.889757	-0.0247407	0.0914073	0.00889343	0.495662	0.0247673	0.218576	0.0360923	0.0414267	0.0388255	0.0327506	0.0392406	0.0330745	-0.0140101
rs72801843	-0.00963008	0.572176	-0.00891625	0.64022	0.0208547	0.234718	0.0106025	0.515221	0.00822611	0.568081	-0.00702328	0.739071	-0.0156318	0.397908	-0.00563522	0.765208	-0.00559064	0.768246	0.0149501	0.480174	0.0093868	0.661801	0.0168523	0.317919	-0.0049393	0.826252	-0.0121137	0.590537	0.0288611	0.761922	0.00953577	0.596539	0.0102427	0.617458	0.0278104	0.136607	0.0283038	0.0965121	-0.0127927	0.399003	-0.00575522	0.805377	0.00720328	0.726359	0.0165669	0.433467	0.00737278	0.730019	0.0103018
rs73189617	0.0111309	0.499409	-0.00243907	0.894258	0.000374492	0.982304	-0.00831409	0.595798	0.010767	0.437264	0.0077426	0.70233	0.0133208	0.454202	0.00933589	0.606717	0.0275264	0.131856	0.0225875	0.267402	0.0184758	0.370859	0.00327811	0.839233	-0.0234949	0.27399	0.0227604	0.291033	0.183357	0.0447591	0.00437812	0.801246	-0.0208259	0.29145	0.00783661	0.662099	-0.00506843	0.756509	0.00931728	0.522093	-4.47498e-05	0.998407	0.00286734	0.885175	0.00181517	0.928945	0.022697	0.270791	0.0253287
rs7365380	0.0160327	0.272569	0.0169859	0.297508	-0.002671	0.858636	-0.0252524	0.0696443	-0.00057582	0.962703	0.0337539	0.060042	0.00523964	0.740277	0.00767862	0.633571	0.00450582	0.781293	-0.00346871	0.847812	0.012423	0.497532	0.00459297	0.749622	-0.004164	0.827103	0.00216798	0.910081	-0.0322097	0.689529	0.018133	0.236138	0.0175565	0.312191	-0.0156862	0.32187	-0.0280711	0.0517612	-0.00201685	0.875348	0.0461812	0.0192393	-0.000885745	0.959477	-0.0145257	0.41696	-0.00868864	0.631473	-0.0143283
rs743134	0.0280725	0.0594642	0.00789466	0.634983	0.000676027	0.964819	-0.00370439	0.79459	-0.00071572	0.954669	0.0417745	0.0230299	0.0318308	0.0481987	0.00864536	0.599078	-0.00529648	0.74899	0.030737	0.0965355	0.0338317	0.071013	0.0107668	0.463596	-0.00289835	0.881802	0.0277826	0.156185	-0.00755285	0.9274	0.0279209	0.074815	0.00245323	0.890711	-0.00448766	0.782928	-0.00551984	0.710076	-0.00293849	0.824149	0.0486067	0.0167966	0.0291676	0.103077	-0.000889333	0.961416	-0.00863526	0.642579	0.0321247
rs74370218	0.0228388	0.135808	0.0150748	0.377494	-0.00910543	0.562984	-0.00869513	0.551848	-0.0155742	0.228186	0.011227	0.551959	0.0354598	0.0320394	0.0223585	0.185497	0.0167486	0.324205	0.000297096	0.987521	0.00507525	0.792093	0.0101297	0.501746	-0.000648618	0.974275	-0.00795018	0.69288	0.0837565	0.322284	0.0181783	0.256868	0.00182048	0.920352	-0.00570001	0.731718	-0.012609	0.405402	-0.0131664	0.329221	0.00638486	0.758445	0.0321487	0.078741	0.00772155	0.681148	0.00464187	0.80706	0.00684214
rs74796574	-0.0103638	0.805276	-0.0282808	0.54477	-0.0302049	0.483076	0.0340565	0.394292	0.0219688	0.534237	0.0188903	0.71594	-0.00912302	0.839616	0.0464856	0.312083	-0.0122468	0.791106	0.0563313	0.279523	-0.00968689	0.854388	0.0519505	0.207203	-0.0348269	0.521771	-0.0245778	0.654669	-0.205571	0.37981	0.00780624	0.861452	-0.0263814	0.600262	-0.0411679	0.373745	0.0250824	0.552178	0.00119529	0.974622	0.0266293	0.646189	0.00975555	0.846563	0.0916306	0.0765215	0.0249568	0.633318	0.0550842
rs7487854	-0.0214713	0.471117	-0.0081073	0.808008	0.0575363	0.0621384	0.0554609	0.0527627	-0.00587602	0.816475	-0.0117567	0.74972	0.00297005	0.926588	0.0225979	0.492374	-0.0124	0.707736	-0.029619	0.425265	-0.038002	0.312663	0.0212626	0.469585	0.0336554	0.388044	0.0120746	0.758386	0.113783	0.487969	-0.0326897	0.292724	-0.0317352	0.370233	0.0604942	0.0626083	0.0722142	0.0147386	0.00756447	0.774285	0.0147086	0.715319	-0.00908241	0.797769	0.00813571	0.823251	-0.0316933	0.389967	-0.0309108
rs74944275	-0.0777137	0.0604101	0.00195973	0.965736	-4.81161e-05	0.999079	0.0160105	0.679082	0.058282	0.0891658	-0.068731	0.172289	-0.0168285	0.705115	-0.0300007	0.506703	-0.049479	0.279006	-0.0566668	0.264424	-0.0533441	0.299813	0.0227912	0.572834	0.0109114	0.837289	-0.0607838	0.256337	0.00918904	0.967418	-0.0847653	0.0465048	-0.0198514	0.683011	-0.00188962	0.965437	0.0181555	0.647858	0.0375915	0.288192	-0.0894402	0.104622	-0.0303181	0.537577	-0.0379249	0.450787	-0.0250784	0.623801	-0.0605093
rs750472	0.00351215	0.814505	0.00456228	0.785187	0.0101394	0.509475	-0.0117836	0.408904	-0.00757197	0.548512	0.0165291	0.370724	0.0237363	0.143577	0.00751422	0.649582	0.0151087	0.364621	-0.0256677	0.166774	-0.0309065	0.100418	-0.00789235	0.593279	0.00319169	0.871397	-0.00232997	0.905861	0.0620163	0.453669	0.00913118	0.558812	0.0153979	0.387741	0.000781266	0.961506	-0.0160911	0.275457	-0.00963663	0.463281	0.0217992	0.282391	0.0352173	0.0489435	0.0198671	0.279056	0.0239912	0.196939	-0.0285578
rs7534501	0.00895328	0.540034	0.00925605	0.570753	0.0035502	0.813052	0.0121008	0.385212	0.00763551	0.535702	0.0124231	0.490822	0.0150706	0.340772	0.00924567	0.566456	0.00740797	0.648207	0.012818	0.478297	0.00715571	0.696111	0.00934759	0.51643	-0.00873013	0.647276	0.000288891	0.988003	0.0971552	0.232562	0.00142371	0.926541	0.00281945	0.872425	0.00306162	0.848081	0.00348253	0.81107	0.00772769	0.551467	-0.00131673	0.947479	0.00879679	0.617915	-0.000584279	0.974245	0.0143192	0.434206	0.00839643
rs7583067	0.0127084	0.482985	0.00886965	0.660351	-0.00492264	0.791243	0.00628261	0.715928	-0.00769925	0.614218	-0.000373861	0.986605	0.0254781	0.192724	-0.00843149	0.672201	0.0291264	0.146814	-0.00544676	0.808012	0.00403444	0.859023	-0.0141062	0.428011	0.0276373	0.244121	-0.0125284	0.597386	-0.0899519	0.36623	0.0103408	0.58413	0.00870122	0.68535	-0.0336676	0.0855391	-0.0140347	0.431761	0.00363219	0.819288	0.00560623	0.818463	0.0273829	0.204185	0.005696	0.79674	0.0270559	0.22715	-0.0072043
rs7590388	0.0217377	0.141042	0.0230776	0.161288	0.0135639	0.369631	-0.00855719	0.54207	0.00729304	0.556815	0.0233332	0.198764	-0.0075692	0.635492	-0.0028114	0.862927	0.00217277	0.894611	-0.00429304	0.813918	0.0142302	0.441266	1.04021e-05	0.999429	0.0151749	0.429755	0.00104031	0.957173	0.0465706	0.57002	0.0241497	0.120476	0.0241787	0.171538	0.000970226	0.951849	-0.0158934	0.277816	0.00723533	0.579032	0.0257267	0.201196	0.00169051	0.924147	0.00254434	0.889007	-0.000957088	0.958643	-0.00489643
rs7599488	0.000827851	0.95479	0.00265456	0.870962	0.00498682	0.739631	0.00213341	0.878277	-0.00428722	0.727904	-0.00883309	0.624071	0.00379834	0.810297	0.0140633	0.383437	-0.00953331	0.557551	-0.00996079	0.582013	-0.00455664	0.803761	-0.0121892	0.398191	0.0156626	0.411761	-0.00636151	0.740729	-0.0107196	0.89526	0.00159695	0.917647	0.00192083	0.912794	-0.0160355	0.315612	-0.00767823	0.598119	-0.0103998	0.422768	-0.0166025	0.405685	0.00477239	0.786395	0.00428505	0.812697	-0.0136233	0.456512	-0.0157839
rs7609050	-0.00512026	0.729181	0.00574979	0.727199	0.020919	0.167255	0.0122373	0.384173	-0.00102637	0.934248	-0.0111086	0.54007	-0.00716564	0.653331	-0.019099	0.240381	0.00412654	0.801043	-0.00609082	0.738418	0.00779195	0.673396	-0.00686473	0.636222	0.0242775	0.20858	0.00275886	0.886735	0.00727838	0.928977	0.00429496	0.78208	0.0111891	0.525765	0.0080984	0.613513	-0.00161935	0.911783	-0.00542744	0.676741	0.00409265	0.83797	0.0119755	0.498384	-0.011196	0.537671	0.0201303	0.272708	-0.00152091
rs7618519	0.00191282	0.896033	-0.00068078	0.966837	-0.00538992	0.720199	-0.011069	0.428121	-0.0109643	0.374771	-0.00422917	0.815157	-0.0170802	0.28194	-0.0017173	0.91551	-0.00867044	0.595284	0.0193138	0.287806	0.0113498	0.537658	0.0122111	0.399055	-0.0231145	0.229361	-0.00398216	0.836624	0.0395434	0.627446	-0.00365867	0.812207	0.00327465	0.851804	0.0113783	0.475007	0.00832247	0.566514	-0.00703662	0.586371	-0.0125633	0.528913	-0.0179304	0.308327	-0.00490095	0.786218	0.00294781	0.872056	0.0149783
rs7633520	0.0097932	0.548952	0.0252153	0.167608	-0.0322411	0.055118	-3.44302e-05	0.99824	0.00400995	0.771429	0.0187026	0.353566	-0.00743891	0.6748	0.00647016	0.720294	-0.0178029	0.32844	-0.00433149	0.830887	-0.0112563	0.583887	0.020354	0.208111	0.0255915	0.231873	0.0318433	0.1396	0.106221	0.246698	0.00132208	0.939153	0.0279487	0.156854	-0.0181665	0.311838	0.0131768	0.420969	0.0017852	0.902562	0.00325869	0.88445	-0.0105669	0.594007	0.00357323	0.860555	-0.026577	0.197012	-0.0195886
rs7699872	-0.00182436	0.907008	-0.0147251	0.39983	-0.00606779	0.706234	-0.0158662	0.288364	-0.0133055	0.313996	0.00401911	0.83473	-0.00594242	0.725351	-0.000227935	0.989466	-0.017118	0.32456	0.0294236	0.128851	0.0194336	0.322377	0.0304357	0.0488453	-0.0211664	0.302958	-0.0152483	0.459374	-0.00639234	0.941521	-0.0169285	0.303563	-0.0327315	0.0810758	0.0071154	0.677124	0.00103256	0.947149	-0.00793707	0.567173	-0.0145751	0.494019	-0.00466972	0.803843	-0.00583659	0.762575	-0.0331924	0.0893953	0.027443
rs77482156	-0.0216566	0.498694	-0.0184096	0.607455	-0.0468818	0.152109	0.0140414	0.644082	0.0792052	0.00320931	0.0913054	0.0207034	0.000479873	0.989	-0.0201443	0.569683	-0.0325765	0.362325	-0.005092	0.897522	-0.032332	0.419591	-0.0233212	0.460014	-0.0122351	0.771263	-0.00121882	0.976899	0.044627	0.79918	-0.0426749	0.1999	-0.0360278	0.34226	-0.0170807	0.619016	0.0442298	0.157748	0.0638943	0.0220085	0.0421642	0.327968	-0.00434305	0.909146	-0.0408719	0.295443	-0.031781	0.421873	-0.023539
rs7763264	0.0263743	0.0807039	0.0143544	0.397008	-0.00675349	0.663916	-0.0242465	0.0928295	-0.028184	0.0271819	0.0128126	0.493627	0.00951349	0.561635	0.00169298	0.919343	0.0321	0.0564206	0.0241993	0.196738	0.0291793	0.124507	0.0161809	0.279292	-0.0329535	0.0961228	-0.0123117	0.537633	-0.0564681	0.499698	0.0373597	0.0179562	0.0175458	0.330354	-0.012961	0.427846	-0.0254992	0.0869888	-0.0302408	0.0226196	0.0242436	0.237024	0.00981532	0.587386	0.000289694	0.987549	0.0272063	0.147469	0.0517151
rs78066960	0.0306645	0.0538149	0.0257624	0.147733	-0.0202384	0.215669	-0.030594	0.0437576	0.00273564	0.838541	0.0428791	0.0293623	0.0245017	0.154785	0.00247865	0.887902	0.0078727	0.656255	0.0272452	0.167271	0.0102677	0.607541	0.0411935	0.0088538	-0.0017986	0.931591	0.0253532	0.227672	0.146696	0.098809	0.0228982	0.172703	0.0144133	0.450684	-0.022494	0.195629	-0.0230983	0.144882	0.00965527	0.49381	0.0437474	0.0448792	0.0272272	0.1553	0.00891226	0.650877	0.00519421	0.794133	0.00831462
rs7814022	-0.0114977	0.429891	-0.014122	0.384772	-0.0137962	0.357119	0.00741648	0.59387	-0.00165582	0.892968	-0.0122272	0.496572	-0.00316307	0.840744	-0.021754	0.175507	-0.0077173	0.633321	0.0146759	0.416806	0.0138187	0.45073	0.00311589	0.828306	-0.00241904	0.899262	-0.0102064	0.594193	0.0916103	0.255673	-0.00485036	0.750327	-0.0187252	0.280168	-0.00304043	0.847627	0.0104635	0.468177	-0.00173074	0.892844	-0.00972606	0.623087	-0.00748159	0.667068	-0.0274659	0.123985	-0.00601064	0.73972	0.0148873
rs7873907	0.0125165	0.39309	-0.0023097	0.887261	-0.0122967	0.411955	-0.025485	0.0669617	-0.00703374	0.567711	-0.00965315	0.591466	0.00990942	0.53088	0.0106753	0.507707	-0.00739194	0.648922	0.0361895	0.0456842	0.0365327	0.0465718	0.00756334	0.598728	0.0341023	0.0741687	0.021984	0.251251	0.122532	0.12914	0.00262909	0.864208	-0.0126114	0.468859	0.000554982	0.972097	-0.0113504	0.432561	-0.00441026	0.73201	-0.0243361	0.219474	0.00698275	0.689958	0.010087	0.57441	-0.00424686	0.815451	0.025001
rs79245415	0.00374708	0.897715	0.00615742	0.849995	-0.0383189	0.201773	-0.00504731	0.856284	0.0197408	0.423045	0.00218741	0.951464	-0.0206204	0.512566	-0.0360291	0.262089	-0.00161723	0.960168	0.0492036	0.173279	0.0420777	0.250445	0.000886596	0.975377	0.0566487	0.141632	0.0707558	0.0649205	0.242432	0.133266	0.0109085	0.7215	0.0288929	0.405761	-0.0304167	0.338688	-0.00278861	0.923345	0.00253182	0.921851	0.00369473	0.925624	-0.0458258	0.187865	-0.0427382	0.232035	-0.0226334	0.531879	0.0576878
rs79582714	-0.00416209	0.860158	-0.00399091	0.880033	0.0276265	0.254044	0.0215472	0.337936	-0.00846002	0.670622	0.0179173	0.538618	-0.0213035	0.407435	-0.0172343	0.510944	-0.0325989	0.216493	0.0189263	0.517451	0.0248648	0.401463	-0.00330897	0.887113	-0.0122005	0.693791	-0.017196	0.580269	-0.121149	0.355346	0.00975813	0.693958	0.00510773	0.856183	0.0194717	0.447432	0.0164289	0.481948	0.00459884	0.82506	0.0153242	0.632805	-0.0175253	0.537296	-0.0201398	0.489565	-0.0283723	0.335838	0.0440221
rs7963801	0.0243908	0.112984	0.0170289	0.321576	-0.0118665	0.452841	-0.0196475	0.180584	-0.0159702	0.218417	0.0499001	0.00842435	0.0307952	0.0647401	0.0426823	0.01197	0.0226686	0.185276	-0.00580348	0.760792	-0.0302336	0.11757	0.0043733	0.77334	0.0240371	0.233328	-0.00265967	0.895668	0.156648	0.0652267	0.0126737	0.431358	0.00532457	0.771095	-0.0159014	0.340014	-0.0172858	0.255176	-0.0106669	0.430498	0.0399938	0.0546404	0.0420107	0.0223499	0.0510176	0.00685501	0.0143086	0.4541	-0.0283224
rs7978070	0.0139654	0.343721	0.00247669	0.880468	-0.00263858	0.861606	-0.0165109	0.239929	-0.00189461	0.878861	0.0163221	0.368986	0.0135666	0.395031	0.0074066	0.648651	0.0160762	0.326452	0.0132534	0.468209	0.0224435	0.225437	0.00308173	0.832117	0.0149158	0.441712	-0.00763843	0.693576	-0.00542814	0.94706	0.0313606	0.0427316	0.0112988	0.520949	-0.0132085	0.409795	-0.0251493	0.0850832	-0.019881	0.12646	0.0290454	0.14702	0.00773484	0.661521	0.00285988	0.874562	0.0116926	0.524126	0.0132468
rs7998050	0.0107328	0.494662	0.013107	0.45788	-0.0357025	0.0273348	-0.00297949	0.842791	0.00804544	0.544748	0.024869	0.201735	-0.00369222	0.828939	0.00390281	0.822943	-0.0210391	0.231204	0.0404564	0.0378811	0.0182072	0.356548	0.0145154	0.352543	0.00521145	0.801821	0.0155749	0.454511	0.0807791	0.358191	0.0139424	0.398142	0.012519	0.508103	-0.023035	0.179133	0.000479258	0.975541	0.00510029	0.714075	0.026856	0.211572	-0.00832186	0.660315	0.00793745	0.683284	-0.0254311	0.196664	0.0476877
rs80170948	0.0806797	0.0405095	0.0989331	0.0244828	-0.0938976	0.0204234	-0.0461689	0.219543	-0.0576695	0.082768	0.103486	0.0332255	0.0518853	0.225424	0.059902	0.169353	0.00040127	0.99273	-0.0104317	0.831435	-0.00775551	0.875886	0.0368561	0.344711	-0.0510882	0.318046	0.0286278	0.582748	-0.140505	0.525325	0.0475581	0.252315	0.0901185	0.0574131	-0.0787248	0.0691998	-0.0440498	0.264744	-0.0263305	0.454097	0.0901799	0.0954746	-0.00176576	0.970411	0.0422934	0.386426	-0.00956065	0.847233	-0.039488
rs830386	0.0116168	0.49342	-0.0022624	0.904584	0.00649027	0.708672	0.013961	0.3866	0.00823988	0.563374	0.0291588	0.161545	0.00194792	0.915528	-0.00862258	0.645278	0.00678551	0.718641	0.00199688	0.924006	0.00645194	0.761018	0.017837	0.285162	0.0209862	0.343261	-0.0193444	0.384607	0.0314236	0.736983	0.0064927	0.714861	-0.000586983	0.976732	0.00145218	0.936886	0.0166394	0.319536	0.0179154	0.228764	0.0403165	0.0787856	0.00470671	0.816465	-0.0188913	0.363818	-0.0128326	0.541991	-0.00411687
rs889956	-0.00991545	0.519076	0.00888264	0.604923	0.009675	0.540586	0.00459562	0.754205	-0.00377328	0.771314	-0.0246821	0.192588	-0.0255866	0.123875	-0.0156688	0.355916	-0.0192924	0.258342	0.00780697	0.6825	-0.00369251	0.848587	0.00913966	0.546903	-0.015485	0.441849	0.020537	0.310003	0.120691	0.154893	-0.00491184	0.760153	0.00509333	0.780526	0.00762026	0.647633	0.0101177	0.505581	-0.0110157	0.4157	-0.0157385	0.449008	-0.0343202	0.0613477	-0.0246312	0.191034	-0.0248414	0.192543	0.00409233
rs909674	0.0144863	0.378202	0.0142494	0.438201	-0.00666045	0.693092	-0.00684185	0.662321	-0.0228818	0.0985847	0.0233799	0.248902	-0.0205032	0.249221	-0.0131134	0.469843	-0.0207748	0.255367	0.00321489	0.874567	-0.000266343	0.989703	0.0183836	0.25748	-0.0274723	0.202568	-0.00798774	0.712205	0.228802	0.0125604	-0.00761062	0.662517	-0.00569155	0.773603	-0.00823043	0.647512	-0.00711709	0.664482	-0.0182451	0.211773	0.00644135	0.774727	-0.0160485	0.418505	-0.0175251	0.389479	-0.0223348	0.278005	-0.0217447
rs9295486	-0.0069553	0.63571	0.00548941	0.737182	0.00351469	0.815797	0.00598105	0.669356	-0.00349102	0.77806	-0.00993337	0.582579	-0.0161306	0.308886	-0.0180571	0.264219	-0.025919	0.111188	0.00855843	0.638109	-0.0106435	0.563725	0.010867	0.452312	0.012667	0.511843	-0.0313185	0.104472	-0.0359006	0.658183	-0.000817098	0.957606	0.0174534	0.317154	-0.00256848	0.871956	-0.00775921	0.593241	-0.00954062	0.460759	-0.0125502	0.527861	-0.0235441	0.178992	-0.00697292	0.698327	-0.0298385	0.101168	0.00280565
rs935116	0.023065	0.136923	0.0269411	0.120131	0.0198125	0.213907	0.00830955	0.574465	-0.0099797	0.445714	0.0229044	0.230941	0.0114364	0.495756	0.018562	0.278533	-0.00870231	0.613618	-0.00200073	0.917047	0.0207333	0.28693	0.0239025	0.118152	-0.000540865	0.978807	-0.00256776	0.899788	-0.107012	0.211075	0.0284383	0.0796298	0.0321806	0.0808541	0.0229553	0.172094	0.00893947	0.559687	-0.00959733	0.481928	0.0235386	0.261743	0.0065298	0.723984	0.0161002	0.396642	-0.00747616	0.697084	0.0157939
rs9384679	0.0105954	0.485054	0.0207896	0.219671	-0.0130657	0.400606	-0.0267093	0.0641447	-0.000225537	0.985898	0.00452038	0.808859	0.0109277	0.50618	0.0219822	0.189207	0.016174	0.338092	0.0315397	0.0927658	0.00812225	0.669356	0.0163206	0.274983	0.0300614	0.130017	-0.0106661	0.592557	0.0547842	0.514282	-0.00112136	0.944002	0.000105463	0.995355	0.00221267	0.893138	-0.00896313	0.550522	0.00433553	0.745727	0.00884386	0.667788	0.00567779	0.755281	0.025012	0.180699	0.0148359	0.433028	0.011627
rs9451649	-0.000257331	0.986389	0.00435799	0.796123	-0.0253631	0.102014	-0.0236947	0.0998591	-0.00623954	0.624212	-0.0337748	0.069945	-0.0143054	0.381423	-0.0105907	0.524865	-0.0165058	0.325539	0.0458052	0.0142322	0.0349718	0.0648241	0.0172352	0.246995	-0.0182535	0.357284	-0.0337825	0.0890107	0.21368	0.0110541	-0.00974156	0.540768	-0.000341776	0.984978	-0.0210462	0.202556	-0.021263	0.15784	0.000518208	0.969169	-0.039843	0.0539022	-0.0179868	0.323004	-0.0110824	0.552883	-0.0321345	0.0893675	0.0377378
rs9467777	0.0415672	0.0163241	0.0402025	0.0376764	-0.0392825	0.0271785	-0.028298	0.0865413	-0.0105332	0.470818	0.00904096	0.671937	0.0611803	0.00107546	0.0476753	0.0125124	0.0323924	0.0917914	0.0215838	0.314999	0.0281489	0.195881	0.0165483	0.332975	-0.0332376	0.144005	0.0148208	0.515796	-0.0336894	0.726146	0.0374948	0.0392268	0.0424736	0.0401684	-0.0416197	0.0272379	-0.0330981	0.054078	-0.0297674	0.0517528	0.0101861	0.665149	0.0445768	0.0314842	0.0261067	0.220015	0.00264938	0.902122	0.0183722
rs9477970	0.0410171	0.0323801	0.00720712	0.73502	-0.0263924	0.178823	-0.000315797	0.986176	-0.0265906	0.0990052	0.0468	0.0459505	-0.0270917	0.18906	0.000497768	0.981133	0.00886247	0.675236	0.0267533	0.257545	0.0330946	0.166894	0.0284622	0.129592	-0.0326705	0.190533	-0.00750171	0.764721	0.0545661	0.603473	0.0340693	0.0877086	-0.0121921	0.590511	-0.0308268	0.135025	-0.00476508	0.799955	-0.0234642	0.16108	0.0413423	0.107952	-0.0242143	0.287394	0.00501899	0.830001	-0.00245718	0.917076	0.0203667
rs9489945	-0.00510032	0.73038	-0.00766441	0.642222	-0.0202335	0.183385	-0.000519931	0.970626	0.00856312	0.493049	-0.000440695	0.980697	-0.0012575	0.937309	-0.01323	0.417202	-0.0142159	0.387029	0.00404805	0.825207	0.00765367	0.680288	0.00184885	0.899137	0.0441999	0.0225903	0.0234358	0.228146	0.0984701	0.230312	0.0021008	0.892626	-0.0036997	0.834244	-0.00751328	0.641307	-0.0019155	0.896332	0.00374583	0.774851	0.00892008	0.657485	-0.0032983	0.852545	-0.00281312	0.877336	-0.0157364	0.393641	0.0164838
rs9520384	0.0212617	0.172682	0.011952	0.491275	0.0010836	0.946081	-0.0183776	0.216599	-0.00875553	0.505822	-0.0161308	0.400562	0.0430892	0.0105222	0.0198125	0.248473	0.0188739	0.27503	0.0322553	0.0938603	0.0271518	0.164022	0.0242314	0.113933	-0.0167174	0.413291	-0.0350874	0.0861394	0.154549	0.0741885	0.0254517	0.122383	0.010076	0.589299	0.000136712	0.993614	-0.00900666	0.562948	-0.00905595	0.513667	-0.0196516	0.355942	0.048857	0.00917042	0.0212091	0.27049	0.0218815	0.261154	0.0371239
rs9541479	0.0256186	0.0854001	0.0226253	0.173207	-0.0116959	0.445016	0.00183928	0.897061	-0.014089	0.262419	-0.00452659	0.805376	0.032325	0.0446706	0.0291446	0.0759851	0.0102073	0.536866	0.0111798	0.544363	0.0110064	0.556	0.00331205	0.82161	0.00375804	0.847666	0.0439877	0.0246827	0.0637636	0.440231	0.0333338	0.0328059	0.0221584	0.212436	-0.0244699	0.131066	-0.0128164	0.385679	-0.0176063	0.180773	0.0198271	0.327464	0.0394175	0.0269722	0.0426212	0.0198407	0.0212069	0.252084	0.0241103
rs9597254	0.00604109	0.734549	0.0180425	0.364485	0.00388449	0.832212	-0.0248031	0.145009	0.0146527	0.330268	0.0186054	0.397071	-0.0282345	0.142968	-0.00457057	0.815987	-0.0335591	0.0902225	0.0355095	0.107292	0.0179844	0.420883	-0.00381441	0.828127	0.00874904	0.70736	-0.0118473	0.613045	0.119718	0.224601	0.00751561	0.68796	0.00963761	0.650439	-0.00437033	0.821797	-0.0422473	0.0168742	0.0109288	0.487739	0.0289658	0.231054	-0.0211185	0.322273	-0.00964985	0.659293	-0.0275701	0.213815	0.0374962
rs9916613	0.0187408	0.215301	0.0249024	0.139648	0.0191427	0.217385	0.0182784	0.204529	-0.00873972	0.492607	0.00973787	0.600884	0.00798324	0.6248	0.00834259	0.616229	0.00639001	0.703175	-3.27199e-05	0.998607	0.0104684	0.581559	0.00806473	0.587376	0.0100131	0.611355	-0.00985982	0.618908	0.0570563	0.494954	0.010126	0.522524	0.0180764	0.315509	0.0145096	0.376812	0.0212346	0.155895	-0.00526886	0.692579	0.0132113	0.519792	0.0162273	0.368676	0.011556	0.532943	0.00134754	0.942761	-0.00942783
rs9921412	-0.00544925	0.735502	0.0116443	0.516726	-0.00712289	0.667144	-0.00321014	0.834615	-0.00237659	0.861304	-0.00911709	0.645245	-0.02456	0.157242	0.00529076	0.765197	-0.0174085	0.328977	0.00340037	0.86482	-0.0157711	0.435851	-0.0219356	0.166294	-0.0139499	0.506504	0.0280154	0.184973	0.144623	0.106644	-0.00654694	0.701414	0.0185347	0.33837	-0.00433214	0.806081	0.00456197	0.776724	0.00299605	0.834431	-0.00524937	0.811323	-0.0265753	0.170131	-0.00287167	0.885272	-0.0127204	0.527742	0.000734675
rs9934041	-0.0108018	0.492156	-0.0157234	0.372077	0.0242243	0.13481	0.0188504	0.210042	0.00702969	0.597074	0.00764541	0.694104	5.36587e-05	0.997488	0.00501444	0.77305	-7.33258e-05	0.996659	-0.0149431	0.444127	-0.00372528	0.850665	-0.00190588	0.90249	-0.0136932	0.506883	0.00681908	0.742526	-0.161151	0.0659509	-0.00607452	0.713654	0.00694257	0.713052	0.017322	0.313346	0.0110502	0.480465	0.00800823	0.565866	0.0151102	0.481777	-0.00404703	0.83064	-0.000474501	0.980513	0.0114126	0.56165	-0.018551
[truncated: 9 more columns]
