# Supplementary material for: Genetic variation underlying cognition and its relation with neurological outcomes and brain imaging
Source: Aging (Albany NY). 2019 Mar 4;11(5):1440–56. doi: 10.18632/aging.101844 (PMC6428100; doi:10.18632/aging.101844)
Supplement: Supplementary Table S4 [file aging-11-101844-s005.xlsx]

## Sheet: Sheet1
Supplementary Table S4. Association of polygenic risk scores and individual genetic variants with change in cognitive and daily functioning.
	Model 1 - linear regression (adjusted for age, sex, and time between baseline and follow-up measurement)																												Model 2 (adjusted for age, sex, baseline measurement, time between baseline and follow-up measurement, and years of education)
Determinant	Beta.G-factor	P.G-factor	Beta.Letter-digit substitution task	P.Letter-digit substitution task	Beta.Stroop 1	P.Stroop 1	Beta.Stroop 2	P.Stroop 2	Beta.Stroop 3	P.Stroop 3	Beta.Verbal fluency test	P.Verbal fluency test	Beta.Purdue pegboard test both hands	P.Purdue pegboard test both hands	Beta.Purdue pegboard test right hand	P.Purdue pegboard test right hand	Beta.Purdue pegboard test left hand	P.Purdue pegboard test left hand	Beta.15-word verbal learning test immediate recall	P.15-word verbal learning test immediate recall	Beta.15-word verbal learning test delayed recall	P.15-word verbal learning test delayed recall	Beta.Mini-Mental State Examination	P.Mini-Mental State Examination	Beta.Basic activities of daily living	P.Basic activities of daily living	Beta.Instrumental activities of daily living	P.Instrumental activities of daily living	Beta.G-factor	P.G-factor	Beta.Letter-digit Substitution task	P.Letter-digit Substitution task	Beta.Stroop 1	P.Stroop 1	Beta.Stroop 2	P.Stroop 2	Beta.Stroop 3	P.Stroop 3	Beta.Verbal fluency test	P.Verbal fluency test	Beta.Purdue pegboard test both hands	P.Purdue pegboard test both hands	Beta.Purdue pegboard test right hand	P.Purdue pegboard test right hand	Beta.Purdue pegboard test left hand	P.Purdue pegboard test left hand	Beta.15-word verbal learning test immediate recall	P.15-word verbal learning test immediate recall	Beta.15-word verbal learning test delayed recall
Polygenic score no threshold for the developmental component	0.0272421	0.00129914	0.017368	0.0282141	-0.0342192	0.000970601	-0.017975	0.056693	-0.0355891	0.000887347	0.0372002	0.00039612	-0.0116327	0.294894	0.00190075	0.865367	0.0017622	0.871961	0.0325426	0.00408505	0.0310407	0.00537568	0.0357955	0.00162829	-0.0211007	0.0438912	-0.00992424	0.416023	0.0220085	0.0161511	0.0150736	0.0816423	-0.0311558	0.00408486	-0.0188321	0.0522633	-0.0379477	0.0004479	0.0390542	0.000769449	-0.0111224	0.363422	0.00122771	0.919927	-0.00387378	0.749168	0.0301225	0.0148632	0.0259263
Polygenic score P>5e-8 for the developmental component	0.020188	0.0168425	0.014731	0.0619974	-0.033036	0.00139158	-0.0230565	0.014127	-0.0272121	0.0108297	0.0380398	0.000285356	-0.0163096	0.140998	0.000455641	0.967425	0.0020031	0.854443	0.0280071	0.0133163	0.0259764	0.0196687	0.0392154	0.000538699	-0.0183645	0.0788962	-0.0130158	0.285229	0.0190237	0.0372847	0.0146771	0.0897288	-0.0312164	0.00397063	-0.0213401	0.0276659	-0.0314886	0.0035805	0.0444673	0.0001277	-0.0146134	0.231756	0.00184363	0.87967	-4.45142e-05	0.997067	0.0249527	0.0435064	0.0235012
Polygenic score P>1e-7 for the developmental component	0.0203175	0.0164749	0.0154376	0.0506176	-0.0332339	0.00129725	-0.0230545	0.014125	-0.0266016	0.0127227	0.0372147	0.000383288	-0.016087	0.147111	0.00277395	0.803785	-0.00116353	0.915292	0.0282731	0.0125316	0.0262502	0.0185342	0.0383526	0.000713497	-0.0176592	0.090792	-0.0144804	0.234226	0.0204105	0.0261626	0.0158225	0.0680345	-0.0323976	0.00285017	-0.0216103	0.0261092	-0.0302245	0.00528313	0.0436533	0.000173692	-0.0135036	0.270883	0.00430134	0.724598	-0.00322702	0.79071	0.0259806	0.0360094	0.0255156
Polygenic score P>1e-6 for the developmental component	0.0201373	0.0176839	0.0165	0.0369296	-0.0334297	0.00123775	-0.0239475	0.010927	-0.0267385	0.0123986	0.035673	0.000678159	-0.0144305	0.19406	0.00340334	0.761055	-0.00273697	0.80268	0.0283459	0.0124366	0.02851	0.0106357	0.0378768	0.000848035	-0.0155841	0.136205	-0.0116404	0.33992	0.0202074	0.0279806	0.016821	0.0526799	-0.0322066	0.00306602	-0.0226079	0.0201457	-0.0281675	0.00944597	0.0412408	0.000396678	-0.0112067	0.361281	0.0067389	0.581497	-0.00359518	0.767671	0.0273324	0.0276749	0.0288851
Polygenic score P>1e-5 for the developmental component	0.0214418	0.0112433	0.0166209	0.0354147	-0.0286816	0.00560948	-0.0194389	0.0389726	-0.0291346	0.00636236	0.0338642	0.0012545	-0.0121611	0.272545	0.0053443	0.63241	-0.00286338	0.793323	0.0295463	0.00907355	0.0263078	0.0182696	0.0367484	0.00120602	-0.0123559	0.237807	-0.00776722	0.524765	0.0215927	0.0183148	0.0171492	0.0480185	-0.0293819	0.00687554	-0.0197004	0.042816	-0.0304929	0.00485177	0.039559	0.000675257	-0.0100805	0.410259	0.0076648	0.529995	-0.00435983	0.719527	0.0326202	0.00841307	0.0289955
Polygenic score P>1e-4 for the developmental component	0.0187782	0.0277498	0.015543	0.0503	-0.0231995	0.0259457	-0.0199904	0.0347693	-0.0231629	0.0310423	0.027307	0.0097001	-0.0163344	0.143743	-0.00106453	0.924528	-0.0073727	0.502917	0.0267924	0.0188315	0.0252811	0.0243583	0.0308291	0.00680879	-0.00760314	0.469648	-0.00197239	0.872251	0.0190865	0.0392761	0.0168689	0.0533309	-0.0240131	0.0283536	-0.0218611	0.0255965	-0.0257802	0.0180549	0.0301536	0.0100968	-0.0141232	0.253161	0.00304204	0.804498	-0.00910642	0.456888	0.0314101	0.0119407	0.0300778
Polygenic score P>1e-3 for the developmental component	0.0168019	0.0480688	0.0134468	0.0899762	-0.0240361	0.0206018	-0.0172672	0.0672533	-0.0206372	0.0538395	0.0236029	0.0248542	-0.0157537	0.156562	-0.00100923	0.928221	-0.00316819	0.772242	0.0209172	0.066695	0.016525	0.14103	0.0274942	0.0155544	-0.00233371	0.823859	0.00103922	0.932306	0.0166201	0.07145	0.0135284	0.120303	-0.0239203	0.0283262	-0.0197652	0.0426848	-0.0232652	0.0321177	0.0265031	0.0231513	-0.0182259	0.138069	0.00265898	0.828098	-0.00701065	0.564088	0.0255049	0.0411224	0.0224892
Polygenic score P>0.01 for the developmental component	0.013461	0.108176	0.00654342	0.402804	-0.0224205	0.0289331	-0.0159162	0.0878284	-0.0232195	0.0280978	0.0207084	0.0461211	-0.00672402	0.539388	0.0112717	0.307613	-0.000226293	0.983255	0.0129664	0.24994	0.0036329	0.743387	0.019819	0.0771087	-0.000125839	0.990345	0.000499324	0.967038	0.0112836	0.217134	0.0042726	0.621371	-0.0191416	0.0777411	-0.0163413	0.0917982	-0.0225166	0.0369242	0.02091	0.0714212	-0.0127814	0.294549	0.008724	0.472098	-0.00853107	0.478537	0.0184469	0.137216	0.0105236
Polygenic score p>0.05 for the developmental component	-0.00144655	0.861327	0.00413951	0.596697	-0.0134486	0.188968	-0.00959352	0.302145	-0.000938825	0.929076	0.0171531	0.0995482	-0.0192332	0.0783819	0.00684013	0.533806	-0.00407829	0.703425	0.00932515	0.404133	0.000832112	0.939758	0.0101179	0.368111	0.00227106	0.826934	-0.00321649	0.790307	-0.00319787	0.723071	-0.00132563	0.87774	-0.0124847	0.246998	-0.00644695	0.50333	0.00296026	0.782507	0.0196483	0.0904088	-0.0229145	0.0586768	0.00613384	0.610605	-0.00840245	0.480918	0.0109778	0.373292	0.00690116
Polygenic score for educational attainment	0.0281363	0.000827927	0.014203	0.0719681	-0.0252594	0.0152694	-0.0156204	0.0985159	-0.038506	0.000334481	0.0337565	0.00127174	-0.00373583	0.73528	-0.00015635	0.988861	0.003884	0.720652	0.0286073	0.0115667	0.0310574	0.00532155	0.0288651	0.0113498	-0.0210892	0.0448017	-0.00854879	0.485692	0.0200473	0.0275479	0.0109536	0.20513	-0.0239486	0.0280825	-0.0161228	0.0978411	-0.0411519	0.000150209	0.0336732	0.00374107	-0.00284017	0.815949	-0.00234506	0.847824	-0.00144803	0.904394	0.023071	0.0621061	0.0205098
rs10145335	-0.00894391	0.505112	-0.017473	0.169197	0.01302	0.435748	-0.0122806	0.417745	-0.00383396	0.823408	-0.00546793	0.745917	-0.0197884	0.265305	-0.00805633	0.653087	0.00683129	0.695614	0.000456406	0.979906	0.00729219	0.682681	0.00581218	0.750965	0.00573385	0.734819	0.00756702	0.701502	-0.0108888	0.456193	-0.0190411	0.173499	0.016024	0.361303	-0.00427075	0.785179	0.00214373	0.902082	-0.0196187	0.295905	-0.0153513	0.435543	-0.018934	0.335887	0.00787751	0.685603	-1.46497e-05	0.999412	0.0172845
rs10514301	0.0481702	0.00699162	0.00334643	0.841287	-0.0301939	0.170611	0.00650122	0.745228	0.0143493	0.527319	0.0406124	0.0670447	0.0132386	0.574029	0.0172749	0.468351	0.00843756	0.713638	0.0252174	0.294912	0.0246587	0.298007	0.00984284	0.683261	-0.0204482	0.361218	-0.00944568	0.716112	0.0476468	0.0132403	0.00312662	0.864246	-0.0109189	0.635695	0.0309973	0.132087	0.00265359	0.907894	0.0413132	0.0926724	-0.000521259	0.984013	0.00834982	0.748126	0.00019195	0.993996	0.0115267	0.659659	0.0337199
rs10761765	-0.0277473	0.069501	0.00199825	0.888385	-0.0108948	0.562097	0.00155856	0.927201	0.0138775	0.473481	-0.018404	0.331478	-0.0116178	0.560699	-0.0357163	0.0765319	-0.0342865	0.081258	-0.0231942	0.257548	-0.0343903	0.0880666	0.00331292	0.871784	0.00436835	0.817481	0.000422818	0.984738	-0.0227816	0.164346	0.00174164	0.910217	-0.0108692	0.576753	0.0163964	0.345657	0.0108052	0.576702	-0.0110433	0.595297	-0.0205199	0.345817	-0.0275079	0.205933	-0.0310896	0.148693	-0.0158409	0.474523	-0.0356089
rs10786662	0.0160658	0.181025	0.0184377	0.101951	-0.0129605	0.382151	-0.000279193	0.983452	-0.0237878	0.119558	-0.00977597	0.514001	0.0072058	0.648987	-0.018918	0.235703	0.0268714	0.0838161	-0.0307861	0.0571819	0.0133571	0.4017	0.0119182	0.464155	-0.00455583	0.761631	-0.0123869	0.480347	0.0121952	0.346719	0.0139183	0.258735	0.00339768	0.826638	0.0143012	0.301648	-0.0173666	0.260366	-0.0200645	0.226195	0.0112386	0.518702	-0.0218541	0.207832	0.0246382	0.151321	-0.0424748	0.0158767	0.00838503
rs10798879	0.0106143	0.390267	0.00101519	0.930181	-0.005294	0.728247	0.00190239	0.890596	-0.0398428	0.0110807	0.0152726	0.320912	0.00320417	0.843082	-0.0177436	0.278486	0.00273396	0.863599	0.0167417	0.314299	0.0186217	0.255594	0.0304569	0.0685925	-0.0178242	0.24895	-0.0169882	0.346393	0.00909476	0.495257	-0.0088625	0.483106	-0.00271325	0.864832	0.0139849	0.325739	-0.0514914	0.00114134	0.0163114	0.337588	0.00936459	0.598971	-0.0191	0.283102	0.0174742	0.32063	0.0145508	0.422112	0.0153276
rs10806984	-0.000778171	0.949899	-0.0138875	0.237286	0.0138528	0.368701	-0.0016762	0.904592	0.00203623	0.897825	-0.0107846	0.488088	-0.0118562	0.470654	-0.000583043	0.972011	-0.0208077	0.19746	-0.0135338	0.419679	0.0255539	0.121685	0.00509168	0.763816	0.0148273	0.343435	0.0370991	0.0424084	-0.00462854	0.729609	-0.0191155	0.138622	0.0247675	0.126522	-0.00865361	0.549693	0.0101119	0.530015	-0.0113986	0.510038	-0.00786183	0.6651	0.00801605	0.658194	-0.0201504	0.260662	-0.0170015	0.35349	0.0243265
rs10875914	0.00462866	0.70186	0.0070977	0.530066	-0.0252887	0.0897666	-0.00505536	0.708683	-0.00414436	0.787195	0.00763396	0.610628	-0.0368466	0.0200364	-0.0400429	0.0123343	-0.00293341	0.850274	-0.000320729	0.984285	0.00852099	0.595084	0.00513591	0.752694	-0.0230932	0.125296	-0.000589884	0.973202	0.0053211	0.683388	0.0119174	0.333385	-0.0228795	0.142326	-0.0109009	0.43368	-0.00889604	0.566331	0.00954241	0.564529	-0.04663	0.00742322	-0.0448876	0.00983283	0.000724437	0.966354	-0.00279071	0.874802	0.0100011
rs10996430	0.000296268	0.982459	-0.00136089	0.914382	-0.000892492	0.95716	-0.00715857	0.63502	-0.00940832	0.582449	0.00955292	0.569777	-0.0293486	0.0980741	0.00968255	0.588675	0.0186263	0.285059	0.0134628	0.45895	-0.00469643	0.792982	0.0160413	0.381093	-0.00368917	0.826677	-0.0200776	0.309393	-0.000607904	0.966668	-0.00119882	0.93119	-3.36397e-05	0.998458	-0.00227074	0.883855	-0.0151495	0.381182	0.00596331	0.749119	-0.0295517	0.131022	-0.00581569	0.765886	0.0272597	0.158458	0.0191817	0.332528	-0.000645539
rs11126396	-0.0269526	0.0388319	-0.00623468	0.611293	0.00221101	0.891299	-0.0151873	0.301376	0.00181278	0.9133	-0.0268251	0.100831	-0.0261097	0.130071	-0.0122343	0.482217	-0.00996152	0.55653	-0.00768617	0.663103	-0.0190883	0.271804	0.0112308	0.52637	0.0116616	0.474799	0.00340401	0.858578	-0.0226608	0.108916	-0.00791007	0.556879	0.00454541	0.788912	-0.0161563	0.286843	0.00673893	0.689571	-0.0142487	0.433326	-0.0227028	0.233107	0.00045418	0.980955	-0.0026218	0.888954	-0.00214698	0.911295	-0.0255514
rs111342015	-0.0147289	0.463619	-0.00572356	0.76135	-0.00459798	0.852889	0.00255888	0.909466	0.0392637	0.123965	0.0241673	0.337492	-0.0118704	0.653398	0.0168699	0.528881	-0.0131819	0.612566	0.0312591	0.248025	0.0215236	0.419441	0.0208891	0.441878	0.0277172	0.267715	0.058246	0.0462588	0.000393836	0.985517	-0.0148346	0.474296	-0.00790375	0.76176	0.0147203	0.527069	0.0531372	0.0403626	0.0477471	0.0889413	-0.00243411	0.933613	0.028855	0.324293	0.0170482	0.555009	0.0596853	0.0432594	0.0563684
rs111599092	-0.00390478	0.850935	-0.0115372	0.560392	-0.00267761	0.917813	-0.0181012	0.442231	-0.00661242	0.804433	-0.00810792	0.75769	0.0290018	0.295659	-0.0164367	0.554297	-0.0490289	0.0703978	0.0387567	0.17297	0.0126062	0.652589	0.0186205	0.514356	0.0198779	0.452885	0.0125435	0.684268	-0.0165348	0.46303	-0.0243686	0.262658	-0.0258261	0.34499	-0.0352372	0.148995	0.0114842	0.672485	-0.021878	0.455014	0.0199212	0.51625	-0.0116858	0.701626	-0.0727898	0.0158159	0.0441357	0.15697	0.00894371
rs11168951	-0.00345229	0.881148	0.00649994	0.763403	-0.0151864	0.593457	-0.00705865	0.784529	-0.0302077	0.302135	0.0400217	0.162325	-0.0296778	0.332184	-0.0502348	0.105105	-0.0124566	0.677676	-0.00824371	0.789053	-0.0162073	0.592801	0.0174186	0.578803	0.0113356	0.696393	-0.0342739	0.310859	-0.0302942	0.230039	0.0120094	0.614231	-0.0230716	0.444104	-0.0307607	0.252935	-0.00244857	0.934856	0.0179279	0.574717	-0.0692143	0.0415786	-0.0559103	0.100899	-0.0196018	0.558926	-0.0149246	0.658828	-0.0278993
rs112780312	0.00805426	0.56016	-0.00444097	0.732086	-0.000601951	0.97194	-0.0171217	0.270512	0.0244708	0.165209	-0.00012002	0.994438	-0.00621438	0.732788	0.0198717	0.279365	-0.000833375	0.962753	-0.00654967	0.725668	0.000427257	0.981445	0.0107843	0.564158	-0.0431585	0.0129639	-0.0176813	0.380361	0.0192406	0.198504	0.00751198	0.597093	-0.00578543	0.747221	-0.0169563	0.290095	0.0133187	0.455946	0.00253896	0.894217	0.0149046	0.456304	0.027088	0.175599	0.0181438	0.357562	0.00292719	0.886201	0.00744115
rs113714691	0.0281082	0.150537	-0.0117889	0.526869	0.0315063	0.195358	9.01409e-05	0.996744	0.0400522	0.110535	0.0230455	0.349404	-0.0191372	0.461385	0.0416196	0.11313	-0.00548733	0.829501	0.0309776	0.239076	0.0548769	0.03443	-0.0200919	0.454666	0.0298958	0.227287	0.036274	0.210773	0.0246134	0.248322	-0.0144927	0.481847	0.0110689	0.666671	-0.00364081	0.873943	0.0291061	0.255526	0.0157738	0.566564	-0.00646239	0.823497	0.0517548	0.0734836	0.00679896	0.811572	0.0268362	0.356505	0.0448887
rs11628208	-0.0026111	0.830117	0.00713885	0.530269	0.00329919	0.826119	-0.00342333	0.80169	0.00443099	0.774315	0.0101524	0.503637	-0.000508994	0.974566	0.0192649	0.231571	-0.00909475	0.562227	0.0194858	0.235815	0.0110534	0.494712	0.00717337	0.662564	-0.0282477	0.0631498	-0.0358631	0.0429698	-0.00722594	0.583231	-0.00692316	0.579482	-0.00562076	0.722127	-0.000586005	0.966872	0.00804637	0.608151	0.00513162	0.761028	-0.0230395	0.191916	0.000878133	0.960156	-0.023138	0.184502	0.0149081	0.407409	0.00969101
rs11662271	0.00665548	0.579098	0.0129513	0.251599	-0.00988552	0.506293	-0.0162769	0.228071	-0.0103893	0.497608	0.0172564	0.250047	-1.43116e-05	0.999279	0.00259627	0.871027	-0.00323214	0.835095	0.0120672	0.456256	0.0123036	0.440272	0.0207967	0.201241	-0.0114173	0.448405	-0.0103921	0.55374	0.00882074	0.497883	0.0172013	0.164962	-0.00229917	0.883203	-0.0167391	0.230865	0.00735173	0.636536	0.029039	0.0815114	-0.00608333	0.728268	-0.0052924	0.762035	-0.00247818	0.885724	0.0119529	0.500314	0.0040215
rs11678106	-0.00412981	0.73341	0.00309896	0.785253	-0.0214261	0.153167	-0.0130887	0.336422	0.000370804	0.980852	0.00338264	0.823297	-0.0125	0.433108	0.0160047	0.319037	-0.0197761	0.206462	-0.000935381	0.954321	-0.00170581	0.9155	-0.00124139	0.939805	0.00385098	0.799698	-0.00466574	0.792341	-0.000961806	0.941657	0.00100505	0.935893	-0.0243033	0.123461	-0.0140457	0.318674	-0.00517941	0.7414	0.0028908	0.863929	-0.0188544	0.285184	0.004001	0.819697	-0.0226708	0.192402	0.00949566	0.595528	0.0044073
rs11720236	-0.0121733	0.453442	-0.0132966	0.380934	-0.0102849	0.608913	-0.0246861	0.176658	0.0355891	0.0853479	-0.00510649	0.800131	0.000343004	0.987113	0.00866987	0.686787	-0.022514	0.278914	0.0276387	0.207039	0.0715396	0.000902447	-0.0179439	0.413289	-0.00980616	0.629665	0.0121022	0.608329	-0.00604741	0.731772	-0.0182005	0.274477	0.00379096	0.857483	-0.00971046	0.606869	0.0294382	0.16044	-0.00136701	0.951236	0.0107332	0.646766	0.0277813	0.237401	-0.0208536	0.3663	0.00657382	0.783573	0.0618152
rs117431198	0.0257266	0.452145	-0.00732565	0.824139	0.0249908	0.56386	-0.0216257	0.582248	-0.0733376	0.0994014	0.00415858	0.924871	-0.0130476	0.777248	0.0203279	0.660703	0.0594396	0.188866	0.033487	0.475085	0.0396984	0.389657	-0.0292892	0.542259	0.0826158	0.061362	0.027593	0.593817	5.99875e-05	0.998736	0.00481314	0.895674	0.0215076	0.640529	-0.0171535	0.676702	-0.0603006	0.187222	-0.0269324	0.586514	-0.0563222	0.27613	0.020879	0.682648	0.0298636	0.557382	0.0347762	0.507356	0.0501935
rs11759522	0.0281761	0.0216932	-0.000523492	0.96379	-0.0234696	0.123076	0.00392136	0.776633	-0.0319121	0.0416009	0.0269427	0.0791729	0.0344471	0.0328053	0.0187006	0.25271	0.0190083	0.232211	0.0185539	0.265208	0.0238192	0.146133	0.018125	0.27637	-0.0336869	0.0287996	-0.0417146	0.0200726	0.0247252	0.0630604	-0.000365262	0.976939	-0.0219574	0.168905	-0.0043818	0.758564	-0.0223387	0.158775	0.0225021	0.18604	0.0340212	0.0560367	0.0160526	0.368545	0.0176033	0.318213	0.0284971	0.117473	0.0280435
rs117793008	0.0117908	0.657603	0.0287769	0.242319	-0.0368568	0.258462	-0.00602775	0.838698	-0.0619769	0.065396	-0.0164655	0.614979	-0.0383165	0.265777	-0.0017191	0.960323	0.0239569	0.477544	0.0215403	0.548459	-0.00758774	0.830012	0.0249262	0.484692	0.0345659	0.287145	0.0104484	0.785354	0.00349675	0.903782	0.0461261	0.0885559	-0.0163053	0.635846	0.0194734	0.526568	-0.0802587	0.018925	-0.031205	0.391342	-0.0553625	0.14904	-0.0092909	0.806453	0.00215083	0.954618	0.0208703	0.594563	-0.0166244
rs11793831	0.00230927	0.852168	-0.000827996	0.943392	0.000606703	0.968565	0.00814336	0.55995	-0.00347968	0.826276	0.0267702	0.0847234	-0.0205534	0.208097	-0.0097926	0.55161	0.00236175	0.882734	0.0188413	0.262805	7.13032e-05	0.996565	-0.00562784	0.739263	-0.0100034	0.522349	0.0137451	0.450624	-0.00970874	0.46793	-0.01525	0.231831	0.0050632	0.753187	0.019107	0.183613	0.011113	0.487567	0.0150756	0.380585	-0.0279743	0.119563	0.000116841	0.99479	-0.0126982	0.472962	0.0170404	0.352577	-0.00246264
rs11884495	-0.000824136	0.944779	0.00446623	0.687652	0.0162119	0.270353	0.0135772	0.309018	0.00425908	0.778397	0.00135156	0.927277	0.00496834	0.750292	-0.0150585	0.336956	0.00229335	0.880611	0.0181731	0.257149	0.0166581	0.291608	-0.0194519	0.226138	-0.0147626	0.320947	0.00315182	0.855757	-0.00331176	0.797571	0.00494004	0.686171	0.0133203	0.389531	0.00515636	0.709071	-0.0096557	0.530352	-0.00225623	0.891015	0.00932522	0.589196	-0.012644	0.461011	0.0106933	0.528927	0.0108888	0.536057	0.010691
rs11896887	-0.00114743	0.925049	-0.00686422	0.547795	-0.0185514	0.216961	-0.0041347	0.761705	-0.0281813	0.0686724	0.0113525	0.45451	-0.0160745	0.31362	-0.0226445	0.159973	-0.0161889	0.301731	0.024558	0.136416	-0.0066758	0.680981	0.0209031	0.203974	-0.00839358	0.579522	-0.0161876	0.361432	-0.00372957	0.777924	-0.00570536	0.648888	-0.0248578	0.114431	-0.00926014	0.5101	-0.0398789	0.010866	0.0226963	0.178146	-0.0125177	0.477764	-0.0302624	0.0855148	-0.00490043	0.778079	0.0146327	0.417017	-0.0160324
rs11970030	0.012245	0.532271	0.0032926	0.857595	0.0342473	0.156476	0.0106757	0.626373	-0.0277451	0.263976	-0.000570429	0.981297	-0.0495939	0.0541748	-0.051317	0.0479318	-0.0313205	0.214757	0.0117844	0.655904	0.0576537	0.0268008	-0.00750127	0.77652	0.0105506	0.664501	0.0278585	0.327395	0.0195274	0.35601	-0.00732993	0.71357	0.0317224	0.207816	-0.000337257	0.988028	-0.0297678	0.233667	-0.00205859	0.938688	-0.0215798	0.443844	-0.0318926	0.257194	-0.0118163	0.67057	-0.01116	0.698487	0.0473583
rs12438326	-0.00411664	0.736263	0.00718152	0.533803	0.00699517	0.64452	0.00558823	0.68462	-0.0116264	0.456278	-0.0208907	0.173276	0.0183458	0.256688	0.0303703	0.0626166	-0.000632045	0.968281	-0.024367	0.13954	-0.0317433	0.0505461	-0.0185287	0.266204	0.011251	0.467077	0.0203614	0.257341	-0.0103624	0.43279	-0.00383885	0.761748	0.00403498	0.799735	0.00276593	0.845538	-0.0156643	0.321758	-0.0391907	0.0210533	0.0181377	0.309365	0.0300717	0.0905998	-0.00453029	0.79702	-0.0234668	0.19301	-0.0199063
rs12441495	0.00592815	0.752889	0.0123803	0.480939	-0.0432755	0.0612669	0.00638027	0.761165	0.029514	0.215028	0.0131099	0.574713	0.0102591	0.677168	0.0100537	0.686694	0.0051557	0.832016	0.0209266	0.410798	-5.01842e-05	0.998402	-0.0066795	0.792366	0.0208767	0.373592	0.0347372	0.203749	0.0207634	0.309402	0.00475267	0.804459	-0.052856	0.0288425	0.00113724	0.958005	0.0507052	0.0349085	0.0487142	0.0588191	0.0226111	0.404213	0.0295047	0.2762	0.0157317	0.558233	0.0165425	0.550833	0.0236424
rs12485060	0.00679574	0.570399	0.0181316	0.107081	-0.0139191	0.34793	-0.00540351	0.688271	-0.00684276	0.654441	0.00114543	0.939031	0.00113021	0.942921	-0.0143401	0.368489	0.0247181	0.111124	-0.0101937	0.528951	-0.00993961	0.532836	0.0179457	0.27078	-0.00547801	0.717337	0.0124338	0.478893	0.00801922	0.535541	0.0239511	0.0521146	-0.0132105	0.395682	0.00133704	0.923324	-0.000565192	0.970879	0.0108009	0.51502	0.00434364	0.802619	-0.0126042	0.467935	0.0278405	0.104864	-0.00712365	0.686893	-0.009274
rs12646225	-0.0231734	0.239515	-0.0291733	0.11193	0.0456223	0.061766	0.0159074	0.473154	0.0021619	0.931518	-0.0313458	0.202851	-0.0475732	0.063246	0.00143005	0.956266	-0.0455255	0.0704483	-0.0402749	0.131736	-0.0176143	0.50294	-0.000193784	0.994133	-0.00550913	0.822963	0.00854987	0.763393	-0.0138264	0.518626	-0.0195488	0.330286	0.0417735	0.102905	0.0204256	0.371824	-0.01482	0.560454	-0.0267954	0.326781	-0.0500798	0.0771704	-0.00726244	0.798495	-0.0444861	0.111499	-0.0521348	0.0750931	-0.0159719
rs12707116	0.00405595	0.733352	0.00295526	0.790412	-0.0196389	0.179863	-0.023988	0.0710285	0.027717	0.0661117	0.001758	0.905451	-0.0025035	0.872215	0.0112432	0.474525	0.017763	0.245312	0.00729766	0.649029	0.00805128	0.609921	-0.00181584	0.909893	-0.00621078	0.675826	-0.0327464	0.0580911	0.0057507	0.654313	0.0110843	0.362007	-0.0176791	0.247929	-0.0169683	0.214047	0.0132822	0.382762	-0.00368362	0.821804	0.00131104	0.939137	0.0113767	0.507023	0.0209745	0.215877	0.00667808	0.701873	0.015172
rs12713315	0.00744399	0.557016	-0.0192339	0.106347	-0.000340816	0.982721	-0.0149172	0.296358	-0.0277334	0.0868764	0.00715911	0.651832	0.000675502	0.967712	0.012286	0.465739	0.00864951	0.597816	0.00856724	0.617744	-0.0186359	0.269872	-0.00546574	0.750832	0.00624743	0.694122	0.0097755	0.598656	0.00765292	0.5776	-0.0138728	0.287596	-0.00425956	0.796036	-0.0195164	0.18468	-0.0331139	0.0430933	-0.00159674	0.927637	-0.0132361	0.4733	-0.00091919	0.960226	-0.000255828	0.988802	0.0209641	0.263105	-0.0143946
rs12918191	0.00601982	0.670929	0.00881801	0.509108	0.011365	0.518788	0.0101894	0.523651	0.000184026	0.991894	-0.00556841	0.753678	-0.00814297	0.664217	0.00912004	0.629166	0.000599509	0.97404	-0.0100188	0.59836	0.0233952	0.211658	-0.0127172	0.509222	-0.0416698	0.0191852	-0.0132494	0.522601	0.00547793	0.722288	0.00376943	0.796797	0.0242046	0.191317	0.0102136	0.536642	-0.0044853	0.807335	-0.00128017	0.948256	-0.0186361	0.369853	-0.000855205	0.967012	-0.00257943	0.899888	-0.0272726	0.189885	0.008857
rs13062354	-0.0107829	0.362497	0.00852926	0.442726	0.00488	0.738846	0.0174792	0.188456	0.0179174	0.234414	-0.00273108	0.853577	-0.0208574	0.180194	0.0160102	0.308933	-0.0211709	0.166081	0.0215591	0.177582	0.000755601	0.96173	0.000446616	0.977761	0.00568438	0.700746	0.00131368	0.939346	-0.0106534	0.405115	0.0120687	0.322526	0.00525372	0.732299	0.0176577	0.197946	0.0125844	0.410057	-0.00781819	0.634346	-0.0355985	0.0383458	0.0251263	0.143158	-0.0185516	0.274692	0.0270191	0.122277	0.00718988
rs13107325	0.0280786	0.344492	0.0032793	0.905166	0.0478062	0.187739	0.0203722	0.536309	-0.0226779	0.544124	0.0113004	0.757362	-0.0408386	0.295697	-0.0217862	0.577253	0.00155693	0.967533	0.0357177	0.372523	0.0484598	0.218418	0.0547018	0.168655	-0.05591	0.136126	-0.0248395	0.563172	0.032715	0.318152	0.0106731	0.728223	0.0295573	0.443916	-0.00344089	0.92051	0.00311003	0.935518	0.0134782	0.743909	-0.049076	0.260954	-0.0611006	0.156724	-0.0196542	0.647489	0.0356007	0.423393	0.0879662
rs13146981	0.00454257	0.70409	0.0237978	0.0344731	0.00108595	0.941768	0.0081227	0.547176	-0.0166512	0.276962	-0.0198914	0.185112	0.00256256	0.871141	-0.000392237	0.980376	0.0121278	0.434005	-0.00102211	0.949575	0.0082584	0.603583	-0.00459842	0.777718	-0.00894642	0.553821	0.00353281	0.840663	-0.00325468	0.800812	0.025632	0.0371023	0.00081691	0.958002	0.0112569	0.416387	-0.0150154	0.330512	-0.0325391	0.0496378	0.0102095	0.557086	-0.00151987	0.930289	0.00980556	0.567667	-0.00565442	0.74752	0.000900362
rs1318878	0.0191812	0.189007	0.000679656	0.960206	-0.0316885	0.0784062	-0.0262401	0.108247	-0.0526384	0.00455036	0.0139494	0.442978	-0.00667106	0.726741	-0.00565267	0.769358	0.00200597	0.914786	0.0124914	0.525406	0.0145499	0.452354	0.0256588	0.19411	-0.0227771	0.213396	-0.00733673	0.730877	0.0186287	0.245204	-0.00965748	0.52297	-0.0227699	0.234604	-0.019907	0.244414	-0.0349291	0.0670962	0.0175922	0.389971	-0.00473861	0.824244	-0.0112997	0.596394	-0.00392175	0.852286	-0.00571386	0.793304	0.00453143
rs13262595	-0.00312877	0.792546	-0.00439804	0.694451	-0.00833112	0.572184	0.00138189	0.91776	-0.00332145	0.826937	-0.00637328	0.66758	0.018966	0.22679	-0.00860346	0.587557	0.0212697	0.168177	0.0116575	0.467396	-0.00453121	0.774119	-0.00810504	0.615168	0.00347025	0.815922	-0.00289833	0.86746	0.00479498	0.709766	-0.000217105	0.985906	0.000833971	0.957087	-0.00408678	0.767618	-0.0216105	0.160507	0.00353	0.830662	0.0153093	0.37725	-0.00418228	0.808977	0.0222655	0.193734	0.011524	0.512405	-0.00204375
rs13278931	0.00601768	0.606099	0.00295453	0.788449	-0.0103701	0.473758	-0.00165148	0.899974	0.00661462	0.657062	0.00263143	0.857112	-0.00187823	0.903369	-0.00228339	0.883328	-0.00813844	0.590723	0.00769944	0.624592	0.0229661	0.137832	0.0164654	0.300226	-0.01626	0.267343	-0.00160615	0.92535	0.00904401	0.473047	0.0004739	0.968684	-0.00396676	0.793597	0.00658797	0.6265	0.000963335	0.949003	-0.000826583	0.959269	-0.0096033	0.57358	-0.00223355	0.895493	-0.0066689	0.691128	0.00957326	0.576249	0.0182718
rs13425585	-0.00426375	0.726787	-0.00620959	0.584657	-0.0145287	0.332763	-0.00953219	0.483886	-0.0170245	0.270372	-0.00124425	0.934524	-0.0101502	0.52528	-0.0398327	0.0139467	-0.0326535	0.038398	-0.00104252	0.949251	-0.00924689	0.566413	-0.0181181	0.269838	-0.00406805	0.788692	-0.00853992	0.628967	0.00420942	0.748994	-0.00447054	0.717973	-0.0129258	0.408341	-0.00217093	0.876353	-0.0109224	0.481973	0.00811559	0.626664	0.00800242	0.647924	-0.0292645	0.096857	-0.0291125	0.0941634	-0.000373531	0.983198	0.000520121
rs13428598	-0.00745553	0.541933	-0.0134186	0.243458	-0.0187173	0.215861	0.0155247	0.25774	0.00658603	0.672175	0.00426825	0.779788	-0.00165513	0.91811	0.000874374	0.957242	-0.00705232	0.655426	0.018803	0.252676	0.00617821	0.702525	0.00223105	0.892942	0.00153291	0.920232	0.00441528	0.804597	-0.00584581	0.658659	-0.0085336	0.496455	-0.0171308	0.278013	0.00842922	0.549533	-0.00353378	0.821697	0.00403624	0.810711	-0.00673114	0.704212	0.0138794	0.434439	-0.00570497	0.744146	0.0252418	0.158401	-0.00433522
rs1343700	0.00505829	0.682798	0.00831735	0.47519	-0.0148257	0.33298	-0.00258014	0.852705	-0.0248466	0.115161	0.0353393	0.0222536	0.0241527	0.137976	0.000108055	0.994772	0.000717319	0.964226	0.00376027	0.822372	-0.0143167	0.38537	0.0107693	0.522792	0.0125405	0.418521	0.00567474	0.754788	0.0152706	0.256853	0.00608054	0.635641	-0.0217631	0.177728	-0.0209466	0.146067	-0.0363301	0.023671	0.0502018	0.0035329	0.036795	0.0409551	-0.00695583	0.69977	-0.00970018	0.584967	0.00195558	0.915305	-0.0103957
rs1343775	-0.00810005	0.56765	0.0140072	0.291272	-0.0347565	0.0459762	-0.012617	0.424918	0.017881	0.319454	0.0282087	0.109457	-0.0120185	0.517789	-0.0157518	0.401113	-0.00955218	0.601472	-0.0438298	0.0211392	-0.0384197	0.0401808	0.00168535	0.929871	-0.0160006	0.367901	-0.0190006	0.357846	-0.00797656	0.60364	0.0112044	0.439813	-0.0491311	0.00701687	-0.0177942	0.2743	0.019837	0.274558	0.0358269	0.0659402	0.00693461	0.734918	-0.00192859	0.924693	0.006793	0.737011	-0.0530454	0.0105496	-0.0490684
rs1363119	0.00545456	0.654756	0.00741337	0.514741	0.00977472	0.514741	0.0108215	0.42686	0.00774397	0.616194	-0.000953615	0.94968	-0.0216118	0.176108	-0.0112631	0.483759	0.00511595	0.744006	0.0233413	0.155053	-0.00291801	0.856683	-0.00571302	0.728029	0.0115358	0.448537	0.0326828	0.0646601	0.00628165	0.638565	-0.00890905	0.477093	0.0205034	0.194997	0.0195708	0.165823	0.00147784	0.925174	-0.000133272	0.993684	-0.000334199	0.984975	0.00616803	0.727466	0.0169865	0.332103	0.0232287	0.197914	0.0035256
rs1408579	0.00612208	0.60349	0.0201431	0.068041	-0.00334793	0.817417	0.00888154	0.499876	0.0217028	0.146423	0.0109342	0.455998	0.0113438	0.464183	0.0178012	0.255314	-0.00231233	0.879147	0.0074972	0.637	-0.0157056	0.315297	-0.00720291	0.650882	-0.00531677	0.718889	-0.0273587	0.110605	0.00340786	0.789516	0.0206544	0.0888788	-0.00591331	0.698634	0.00367066	0.78783	0.0330185	0.0296992	0.0106817	0.512791	0.00265332	0.877102	0.0241587	0.158268	-0.0105356	0.533245	-0.000309373	0.985803	-0.0127111
rs1428472	0.00799654	0.533517	0.0122843	0.304238	-0.00858539	0.58663	0.00155796	0.913431	-0.000892089	0.956241	-0.000463671	0.976785	0.0230553	0.168537	-0.00185661	0.912662	-0.00410449	0.802871	0.0218599	0.207401	0.016001	0.348742	0.0113196	0.510761	-0.000934239	0.953286	0.00258934	0.889002	0.00977976	0.482086	0.0118219	0.365667	-0.0148975	0.367685	-0.00143861	0.922374	-0.00190625	0.907713	0.0152522	0.386915	0.0209503	0.255206	-0.012534	0.496478	-0.0110261	0.543927	0.0190568	0.313827	0.0302941
rs1473634	0.00440638	0.728884	0.00814427	0.495985	-0.0116725	0.459732	0.0218931	0.126621	0.02806	0.0844017	-0.012511	0.432339	-0.00259008	0.876752	-0.0406053	0.0160327	-0.0301213	0.0662343	0.0242626	0.159073	0.0307989	0.0693106	0.00081388	0.962456	-0.0237328	0.139141	-0.0178651	0.33752	0.00500813	0.716305	0.00855985	0.514889	-0.00852628	0.607066	0.0281461	0.0571814	0.0134474	0.414947	0.00456347	0.79674	-0.00958959	0.604445	-0.0518766	0.00491939	-0.0323336	0.0766033	0.0258046	0.171442	0.0237105
rs1541102	-0.00867243	0.479758	-0.00247229	0.830341	-0.0174777	0.250725	0.00485466	0.725369	-0.0138425	0.377291	0.00386391	0.801834	0.0117319	0.468332	-0.000766235	0.962356	0.0200779	0.204885	0.0249662	0.132561	-0.00183334	0.910701	0.0312058	0.0613167	-0.00827084	0.591358	-0.0195748	0.276559	-0.0145989	0.273162	0.00264916	0.835013	-0.015723	0.327691	-0.00726959	0.612446	-0.0151878	0.341874	-0.00879684	0.608556	0.0219381	0.220686	0.0119355	0.502685	0.0294315	0.0950462	0.0285096	0.117341	-0.0106855
rs1699462	-0.0110622	0.357202	0.00635828	0.571558	-0.00263907	0.858437	0.00971917	0.46902	0.00216309	0.887079	-0.000302988	0.983805	-0.012972	0.412015	0.00869113	0.586214	0.0248028	0.110221	-0.0127375	0.429286	-0.0145011	0.360619	0.00607429	0.707748	0.000640076	0.965961	-0.00728938	0.676396	-0.0140721	0.280581	0.0067496	0.584257	-0.0113976	0.463463	0.00158268	0.90917	0.00656886	0.670778	-0.00534767	0.747314	-0.0133019	0.446237	0.00279806	0.872541	0.0121634	0.480549	-0.0165073	0.350625	-0.0137225
rs1702877	0.00659097	0.609742	0.00299141	0.806086	0.0166126	0.299327	0.0130543	0.368643	-0.00350404	0.831587	-0.0129327	0.424231	0.00294295	0.862483	-0.0248842	0.147876	-0.0101994	0.542341	0.0165587	0.342475	-0.00169912	0.921161	0.00289735	0.869266	-0.0162324	0.317922	-0.0149729	0.429331	-0.00139508	0.920391	0.00666909	0.617314	0.0179035	0.285229	0.0209098	0.162052	-0.00737427	0.658038	-0.0280833	0.117376	0.00799108	0.670083	-0.0179974	0.337089	-0.015161	0.414025	0.0232441	0.220962	-0.00839841
rs17032400	0.0122942	0.296498	0.000318979	0.976957	0.0239457	0.100399	-0.00613115	0.643046	0.00154399	0.918012	-0.00151164	0.918141	-0.0149725	0.332941	-0.00130491	0.933244	0.00400304	0.791948	0.00572829	0.718521	0.0129408	0.408194	0.0224287	0.159115	-0.0248956	0.0911328	-0.00632123	0.712867	0.0210035	0.0992489	0.00361718	0.765936	0.0103448	0.500308	-0.0126185	0.357098	-0.0124189	0.415533	0.00853376	0.602342	-0.0118954	0.486972	0.00594095	0.727319	0.00292557	0.862322	0.0136792	0.432749	0.0179028
rs17251689	0.0140272	0.367574	0.00651393	0.658755	0.0124198	0.522152	-0.00968111	0.582272	-0.0183031	0.359453	-0.00233897	0.905025	0.00510399	0.805229	0.0211205	0.314306	0.0320742	0.11485	0.0217922	0.299489	-0.0226361	0.273925	0.0132231	0.534616	0.00705622	0.718691	0.0160818	0.484038	0.0152582	0.370359	-0.00345619	0.832467	0.0168154	0.41423	-0.0143773	0.433871	-0.0240044	0.240914	-0.0188458	0.391688	0.0124731	0.588168	0.0121285	0.598948	0.0302107	0.183921	0.0239617	0.302726	-0.0231371
rs17420654	-0.00512652	0.690705	0.00694065	0.566051	0.0220155	0.166918	0.00323174	0.823201	0.0105792	0.518826	0.000797916	0.960376	-0.00951665	0.5726	0.00492649	0.773159	-0.0337269	0.0421134	-0.00357782	0.836329	0.00445841	0.793706	-0.00125122	0.942752	-0.0143612	0.374954	0.00645667	0.731812	-0.00332771	0.811181	-0.00188294	0.886933	0.0248111	0.136845	0.0138448	0.35267	0.00790497	0.633527	0.0093745	0.598085	-0.00378536	0.838769	0.00705765	0.704898	-0.0282057	0.125427	-0.0146946	0.436683	-0.00388238
rs17589603	-0.000815559	0.966574	0.0183785	0.314719	0.0126405	0.602623	-0.00224758	0.918775	-0.0214444	0.390883	0.0175224	0.471907	-0.014004	0.582066	-0.044059	0.0875912	-0.0195769	0.432525	-0.0287992	0.275487	-0.0251563	0.333334	0.0229719	0.383736	-0.0101693	0.677865	-0.0215588	0.448609	0.0117632	0.573677	0.0191229	0.334731	-0.00972486	0.699242	-0.0258863	0.249409	-0.00724034	0.77234	0.0381679	0.152103	-0.00844865	0.761422	-0.0288826	0.29963	-0.0125713	0.646948	-0.0192512	0.500471	0.0017162
rs17663165	-0.00553812	0.644952	0.0115458	0.308737	0.0136034	0.362213	-0.00536855	0.692012	0.0111589	0.467904	-0.0141609	0.346977	-0.00644035	0.684366	0.00507266	0.750759	0.00760186	0.624955	0.00325939	0.841272	-0.00456656	0.775599	0.00359051	0.826899	-0.0115081	0.449134	0.0279377	0.113947	-0.00571809	0.660991	0.0142371	0.251138	-0.00772128	0.621597	-0.0206943	0.13843	0.00513035	0.741669	-0.0185062	0.267255	-0.00406061	0.816054	0.00627203	0.71824	0.013557	0.43097	0.00640432	0.71895	-0.000833843
rs1787003	0.0224242	0.0618302	0.015624	0.165243	-0.00995366	0.503047	-0.0173932	0.197478	-0.014421	0.346124	-0.00791473	0.597943	0.0184174	0.244174	0.00745705	0.640634	0.00246813	0.873585	0.0173941	0.282675	0.0297378	0.062042	0.0183486	0.260156	-0.00431659	0.775035	-0.0231392	0.188012	0.0242233	0.0634091	0.0144384	0.244304	0.00175521	0.91064	-0.00596014	0.669625	-0.0177199	0.254271	0.000730005	0.965125	0.0133028	0.447656	0.0169015	0.333479	-0.00487132	0.777785	0.015559	0.381285	0.0257548
rs179994	0.00118186	0.922221	0.0175499	0.122	-0.0189153	0.205521	0.000366227	0.978471	0.00159397	0.917513	-0.00439876	0.770246	-0.0172597	0.276829	0.016816	0.294143	0.00104562	0.946544	-0.0100028	0.540246	-0.00764667	0.63425	0.00739778	0.651025	0.00298327	0.843551	-0.0137032	0.436817	0.012093	0.357079	0.0271009	0.0301927	-0.02814	0.0736427	-0.00753908	0.591823	-0.0202703	0.194933	0.00611327	0.715662	-0.0218859	0.213326	0.0311298	0.0764088	0.00619701	0.721011	-0.0113265	0.527494	-0.011074
rs1892423	0.000821643	0.94496	0.0191483	0.0866932	0.0165383	0.262135	0.000563783	0.966408	-0.0116811	0.441879	-0.0180677	0.224004	-0.0112817	0.470903	0.0105525	0.504317	0.0110842	0.470841	0.00509157	0.751557	0.0135529	0.391934	0.0160098	0.324155	0.0014875	0.920842	-0.0113667	0.515457	0.00329508	0.797987	0.0267955	0.0290124	0.00149969	0.922959	-0.0064545	0.641069	-0.0121742	0.429589	-0.0170034	0.303556	-0.00564695	0.744032	0.00644728	0.708553	0.0116392	0.495082	0.00325324	0.85349	0.0165355
rs1895471	0.00211495	0.86941	-2.74397e-05	0.998196	-0.0307627	0.0537023	-0.01293	0.371864	0.0146839	0.371754	0.0172711	0.284341	0.00375829	0.825341	0.00973368	0.570664	0.0212012	0.203704	0.0405188	0.0192752	0.00807575	0.635693	0.0198059	0.258699	0.00493181	0.760046	-0.0103142	0.585517	0.00333449	0.811493	0.00500508	0.707441	-0.0465185	0.00546378	-0.00959691	0.521291	0.00602645	0.717726	0.0177665	0.32177	0.00693495	0.713431	0.0108772	0.563987	0.0160681	0.387442	0.0440459	0.0200921	0.0109706
rs1953522	0.0074014	0.550895	0.00120408	0.917097	0.0332876	0.0294104	0.0115604	0.404808	-0.0236442	0.133167	0.00979072	0.526099	0.033781	0.03788	0.0116802	0.475785	0.0184458	0.247155	-0.00472504	0.7778	-0.0134187	0.415949	0.0145838	0.383842	0.0019021	0.902626	-0.0112563	0.532498	0.0083104	0.531095	-0.00120222	0.923682	0.0370949	0.019052	0.00618661	0.661532	-0.0261787	0.0962071	0.00560705	0.74064	0.0210105	0.237295	-0.001718	0.922742	0.0129265	0.460063	-0.00875279	0.628331	-0.0116965
rs2007481	0.0151641	0.224673	0.0107894	0.360232	-0.0216141	0.163963	-0.0264171	0.0607178	-0.00507448	0.751208	0.0302995	0.052644	0.0217686	0.185543	0.0128607	0.439291	0.017338	0.283474	-0.00818404	0.627787	0.00165665	0.920634	0.0075729	0.65656	-0.00337831	0.830233	-0.0098906	0.589594	0.0248151	0.0654607	0.0233525	0.069771	-0.0200895	0.215942	-0.0192403	0.183987	-0.0051506	0.749658	0.0377748	0.028915	0.0331781	0.0665077	0.0279043	0.122499	0.0295324	0.0977951	-0.0077662	0.672586	0.0115516
rs2077610	0.000733191	0.950729	-0.00273125	0.807081	0.0285602	0.0524497	0.0134671	0.313739	0.00127628	0.932983	0.0158993	0.285064	-0.00217436	0.889963	-0.0175523	0.264996	0.0187704	0.2224	-0.00544436	0.734852	-0.0241187	0.127288	-0.0166344	0.303419	-0.00780176	0.601467	0.00359087	0.836649	0.00215582	0.865985	0.00050073	0.967391	0.0205072	0.183448	-0.00425183	0.757441	0.00122914	0.936099	0.0212538	0.197382	-0.00431923	0.803101	-0.0208118	0.225091	0.0146371	0.390093	-0.0136923	0.434267	-0.0386438
rs2239647	0.0129705	0.270873	0.0152939	0.16508	-0.030618	0.0345205	-0.0192098	0.143984	0.00768184	0.606632	0.0143981	0.3243	0.0157641	0.308662	0.016248	0.298723	-0.00697049	0.646703	0.0120303	0.447013	0.00644159	0.679182	-0.00273818	0.863474	0.0238562	0.107209	0.0222944	0.193338	0.0169047	0.181267	0.0202378	0.0920329	-0.0247104	0.102668	-0.00618202	0.647363	-0.00203427	0.892434	0.017249	0.285134	0.0265677	0.117759	0.0273057	0.107892	-0.00507141	0.762174	0.0129042	0.45319	0.00472872
rs2284871	0.0177672	0.15945	0.00833825	0.479249	0.00549123	0.724333	0.00433714	0.759129	-0.0330408	0.0392677	0.0255113	0.104149	-0.00779733	0.637071	0.00276018	0.869131	0.0193333	0.234142	0.0139703	0.410081	-0.0174639	0.295441	-0.00116604	0.945338	0.00702424	0.655049	-0.00512826	0.779905	0.023649	0.0841678	0.0186401	0.149895	0.0094686	0.562919	0.00310627	0.831756	-0.0522465	0.00131365	0.0363889	0.037086	-0.00833586	0.648646	0.00115869	0.949491	0.0110298	0.541641	0.00858402	0.643503	-0.0177872
rs2333604	-0.0147066	0.226012	-0.00591788	0.604007	0.0221139	0.14168	0.0227322	0.0959729	0.0223052	0.149404	-0.0129011	0.395135	-0.00949085	0.553164	0.0251633	0.11976	0.0239344	0.128732	0.0169667	0.299329	-0.000385023	0.980921	-0.0155762	0.343598	-0.0185317	0.222735	-0.00895639	0.613295	-0.0185617	0.159037	-0.00900931	0.472305	0.0114301	0.469188	0.022427	0.111417	0.0125322	0.424168	-0.0126758	0.451846	-0.0151895	0.390514	0.0250079	0.157774	0.0140317	0.422704	0.0079576	0.656963	-0.00569999
rs2388334	-0.0114598	0.329056	-0.00301937	0.784452	-0.0175979	0.226631	0.0179863	0.173275	0.00482457	0.747494	-0.00945609	0.519826	-0.014593	0.345313	0.0007496	0.961672	-0.0237769	0.117523	-0.0146422	0.357258	-0.0333665	0.0330089	-0.0145387	0.362279	-0.0064742	0.662045	-0.0152125	0.376228	-0.0201309	0.114492	-0.0115964	0.338611	-0.0142708	0.351212	0.0131673	0.335286	-0.00492899	0.74588	-0.0100436	0.538511	-0.0146059	0.393469	-0.00746459	0.661992	-0.0312175	0.0645136	-0.0205286	0.238641	-0.0418196
rs2420551	0.0138109	0.544038	0.0270882	0.202212	-0.0331931	0.232892	0.0165794	0.51143	-0.0212352	0.458983	-0.00999255	0.72411	0.0101753	0.733149	-0.0289806	0.334533	0.0196815	0.502535	0.00104659	0.972702	0.00771871	0.797527	0.0734288	0.0167349	-0.0118776	0.673435	-0.00845003	0.797895	-0.00187695	0.938694	0.042881	0.0639894	-0.0636369	0.0281966	-0.00284364	0.912536	0.000703479	0.980526	-0.0253612	0.418119	0.000640646	0.984475	-0.0553874	0.0895224	0.00444776	0.890768	-0.00414631	0.900714	0.00848554
rs2425161	0.0198835	0.203122	-0.0018964	0.896345	-0.00121945	0.94944	-0.0323775	0.0634995	0.0106728	0.590713	0.030164	0.120806	0.0171771	0.401714	0.0121544	0.557203	-0.0174824	0.384109	-0.013542	0.520837	-0.0194495	0.348787	-0.0184081	0.382125	0.0342145	0.078032	0.0407284	0.0723061	0.0154593	0.361606	-0.00601278	0.708356	-0.00602772	0.766114	-0.0336149	0.0630865	-0.0159285	0.430063	0.0274509	0.206116	0.0242526	0.285908	0.0266568	0.239721	-0.0128269	0.566776	-0.0121999	0.598196	-0.0278959
rs2426132	-0.00839024	0.48525	-0.0158608	0.158364	-0.00750716	0.612206	0.0028721	0.830786	0.0228375	0.13379	0.00334915	0.82319	-0.0147056	0.35189	-0.00865015	0.587987	0.00201546	0.896663	-0.00721732	0.655827	-0.00754506	0.635993	0.0125304	0.440766	-0.031768	0.0344564	-0.030526	0.0814601	-0.0127496	0.328398	-0.0233448	0.0598388	-0.0148139	0.343007	0.00527049	0.705429	0.0128775	0.406548	0.00536101	0.748581	-0.0209703	0.231109	-0.0275226	0.115711	-0.00502824	0.771214	-0.0175533	0.323912	-0.0197169
rs2457192	0.00395952	0.776031	-0.0161586	0.218741	-0.00318931	0.852956	-0.0108323	0.487828	-0.00297147	0.866698	0.0129903	0.455119	0.0244585	0.18196	0.00672138	0.71645	-0.0233886	0.192359	0.02466	0.189317	0.0275291	0.136434	0.00927277	0.622877	0.00116157	0.94668	0.00277806	0.891158	-0.00445268	0.767097	-0.0147141	0.307205	0.00165375	0.926968	-0.00585513	0.71616	0.0109446	0.541628	0.0175412	0.362634	0.0318332	0.114726	0.0163293	0.418385	-0.0197397	0.320628	0.0217008	0.290642	0.0116856
rs2478295	-0.00987516	0.455623	-0.00877354	0.482523	-0.00902805	0.581662	-0.00181186	0.903064	0.0213627	0.205197	-0.000574766	0.972356	-0.000333786	0.984818	-0.01777	0.315187	-0.000514738	0.97617	-0.00413395	0.816868	0.00706417	0.68773	-7.99299e-05	0.996477	-0.00141617	0.933025	-0.0236352	0.225705	-0.00223117	0.876262	-0.00593148	0.664855	-0.00964699	0.574508	0.00879323	0.566661	0.00185745	0.913407	0.00376034	0.838079	0.0118868	0.539465	-0.00194407	0.919935	0.00257257	0.892907	-0.00270186	0.889581	0.00922723
rs2726513	-0.0162343	0.177857	-0.00866892	0.442289	-0.00429847	0.773438	0.0147375	0.276917	0.00165703	0.914131	0.0105549	0.483585	-0.0247885	0.118578	-0.029118	0.0693203	0.0108698	0.486739	-0.00637409	0.694623	-0.00565723	0.723367	0.0210977	0.196591	-0.009055	0.550221	0.00994457	0.572386	-0.019542	0.131593	-0.0105185	0.391105	0.00717059	0.644803	0.0189378	0.172716	-0.00216563	0.88859	0.0145741	0.37939	-0.0280311	0.107227	-0.0255311	0.140722	0.00643983	0.708124	-0.00712928	0.685965	-0.0101002
rs2765042	0.0130106	0.293908	0.0146021	0.20758	0.0106893	0.485777	0.00887916	0.523673	-0.0138227	0.381459	0.0296045	0.0556491	-0.0101964	0.53151	-0.00994316	0.545621	0.00657909	0.680874	0.0213942	0.200534	0.0208348	0.205366	0.0157306	0.347763	-0.00957086	0.536912	-0.0137315	0.447068	0.0130456	0.330484	0.00524829	0.680024	0.0121557	0.451024	0.0106955	0.457618	-0.0162246	0.311617	0.028389	0.0986831	-0.00492958	0.784617	-0.0197299	0.272978	0.0152653	0.390361	0.0297414	0.103215	0.0286148
rs2819336	0.028263	0.021526	0.017378	0.132567	-0.00599471	0.694393	-0.00468155	0.735348	-0.0279737	0.0749157	0.0339064	0.0272118	0.0100693	0.533884	0.000822701	0.959881	-0.0091319	0.565719	-0.011129	0.502431	0.00822054	0.614795	-4.86427e-05	0.997668	-0.0257455	0.0944225	0.00222389	0.901181	0.0194252	0.144773	0.012057	0.340095	0.00640206	0.689002	0.00635779	0.656201	-0.013621	0.391621	0.03146	0.0642115	0.00548559	0.758247	-0.0139339	0.434832	-0.0199393	0.25742	-0.0203618	0.261194	-0.00830023
rs28549862	0.00958558	0.485357	0.00767064	0.549331	-0.00424623	0.800905	0.0143523	0.347671	-0.00562733	0.745745	-0.000662563	0.968878	-0.000546922	0.975732	0.0087245	0.62931	0.00433179	0.805927	0.0342689	0.062756	0.0259033	0.152947	0.0139824	0.444988	0.0220982	0.191233	0.00438046	0.824557	0.00915169	0.538585	0.010191	0.468994	0.00695371	0.693795	0.0216764	0.169272	-0.00145307	0.934139	-0.00641625	0.733539	-0.00503303	0.799887	0.0098104	0.619046	0.000637767	0.974009	0.0406646	0.0432722	0.0307695
rs28612284	-0.0226477	0.643469	-0.0280774	0.552424	0.0528846	0.402741	0.0473147	0.409815	-0.0238253	0.715038	-0.00551658	0.930601	-0.0409911	0.531987	0.0319317	0.634876	0.0757199	0.237067	-0.0200102	0.767459	-0.0215332	0.746463	-0.0271617	0.691727	-0.0102123	0.871881	0.0152407	0.836275	-0.0162167	0.756659	-0.0153951	0.763664	0.0408459	0.531258	0.0211198	0.717163	-0.044271	0.494857	-0.0116767	0.865497	-0.0484626	0.500307	0.0373932	0.606341	0.0560784	0.427211	-0.0388048	0.595915	-0.0364921
rs28657585	0.0327816	0.0645484	0.00067414	0.968079	-0.0364055	0.100867	-0.0482759	0.0165345	-0.0460483	0.043991	0.020914	0.351301	0.0258656	0.270671	-0.0116338	0.623492	0.0282607	0.221751	0.0157379	0.514413	0.00193109	0.935234	-0.00101654	0.966683	-0.0199931	0.375442	0.0193607	0.461011	0.0248011	0.194975	0.000164692	0.992865	-0.0347048	0.134269	-0.05352	0.0096836	-0.0530372	0.0213283	0.0149537	0.54647	0.010518	0.683468	-0.00267639	0.917181	0.0400254	0.116891	0.0149929	0.568431	-0.017009
rs28892332	0.0167701	0.574797	-0.00835164	0.769517	-0.004588	0.903204	-0.0198805	0.561142	0.0123569	0.749929	0.0872298	0.0221816	-0.048297	0.231017	0.0746943	0.065775	-0.0233197	0.556385	0.0590568	0.142067	-0.0233952	0.55522	-0.000190201	0.996329	0.00370936	0.921955	-0.0164649	0.71245	0.0135156	0.673878	-0.00699685	0.821932	-0.0333372	0.396689	-0.0238903	0.495895	-0.0265798	0.495999	0.0791646	0.0600046	-0.0585049	0.185753	0.0596474	0.175459	-0.0527236	0.227908	0.0722923	0.0985966	-0.0120638
rs2906455	0.0139703	0.462921	0.00602072	0.736224	-0.00657957	0.779368	-0.0182928	0.390812	-0.024204	0.317156	0.00873046	0.713272	-0.0336444	0.180017	-0.0205195	0.417551	-0.0367454	0.136184	0.033909	0.182516	0.0254726	0.309112	-0.000312888	0.990306	-0.00425153	0.859271	0.00218152	0.937377	0.012625	0.537606	0.00590451	0.761496	-0.015661	0.521432	-0.0318612	0.144012	-0.0420927	0.0831112	0.0265196	0.309016	-0.0121832	0.656633	-0.0257389	0.346645	-0.0169133	0.532051	0.0247638	0.36985	0.0188903
rs3092073	0.00831231	0.479337	0.0155522	0.163035	-0.0203535	0.16518	0.00271073	0.838642	-0.0355184	0.0186256	-0.0250793	0.0905769	-0.0100866	0.518334	0.0229209	0.145474	0.0184835	0.226999	0.00263335	0.86859	0.00600394	0.701575	0.00609833	0.705491	-0.0139841	0.34692	-0.0045795	0.792383	0.00687703	0.587725	0.0163302	0.181051	-0.00889596	0.563265	0.00545594	0.691335	-0.0233941	0.126225	-0.0299751	0.0683923	-0.0146543	0.394765	0.0283019	0.0988078	0.019026	0.261643	0.00456747	0.79311	-0.00582407
rs34172651	-0.0182461	0.166779	-0.0136718	0.271021	-0.00688739	0.673539	0.0131102	0.377149	0.00977517	0.561187	0.00631762	0.701603	-0.0224156	0.196791	-0.0130834	0.454772	-0.0232222	0.17341	0.0234649	0.18872	0.0104325	0.552777	-0.0191557	0.284549	-0.0112649	0.497047	0.0173287	0.369031	-0.0223184	0.115825	-0.00947352	0.483387	0.0168081	0.323765	0.0246892	0.104557	0.0149566	0.376834	0.00543784	0.764516	-0.0166109	0.383124	-0.0241125	0.204339	-0.017269	0.358078	0.0149795	0.439015	0.00785483
rs34180096	0.00478322	0.69654	0.012975	0.258344	-0.00554084	0.714279	0.0221597	0.106578	0.013995	0.369044	-0.0278892	0.0675895	-0.0042289	0.793431	0.0237405	0.144833	0.0069631	0.65997	0.0288614	0.0801954	0.0131368	0.418705	-0.0108126	0.515159	0.00353855	0.817317	-0.0120258	0.501363	0.0115321	0.389902	0.01491	0.238176	-0.0127449	0.424763	0.0175739	0.217409	-0.000783046	0.960651	-0.0177074	0.297788	0.000849019	0.962188	0.0216029	0.227105	0.00908949	0.606495	0.0332205	0.0671294	0.0101076
rs34305371	0.0140621	0.534938	0.00922139	0.6629	0.055555	0.047662	-0.00823993	0.746219	-0.0484476	0.0935575	0.0327106	0.24126	0.0302957	0.30225	0.0131015	0.65974	0.0136593	0.636732	-0.0355263	0.246922	-0.0536737	0.0753303	0.00815642	0.788491	0.000459399	0.986944	-0.00542461	0.86863	0.00301575	0.900828	0.00303251	0.894656	0.0441871	0.12904	-0.0309569	0.233608	-0.0280833	0.331767	0.0407147	0.183954	0.0171153	0.592902	0.00323312	0.919527	0.00442676	0.888873	-0.0298654	0.366303	-0.0534124
rs34627	-0.00020521	0.986151	0.017069	0.125643	-0.00758305	0.605499	-0.0144803	0.27712	-0.0144034	0.340532	0.0385257	0.00909984	-0.0155179	0.318977	-0.00890251	0.571412	0.00462478	0.762302	-0.0022708	0.887056	0.0139725	0.374653	0.0277538	0.0834527	-0.0129499	0.380157	-0.0448236	0.00948954	0.00251936	0.844836	0.0239135	0.0504926	-0.0137377	0.374427	-0.0212855	0.123208	-0.0212254	0.167209	0.0414252	0.011692	-0.0173118	0.31418	-0.0099288	0.563575	-0.00764063	0.652845	0.000174527	0.992071	0.0126358
rs34811474	0.0174828	0.3709	0.0138562	0.451923	-0.0118291	0.628047	-0.0260166	0.240252	-0.00493814	0.844167	0.0298643	0.22283	0.0399748	0.122031	0.0133713	0.607921	0.0392131	0.1225	0.0168755	0.525481	0.0286124	0.274208	0.0181378	0.494421	-0.0431538	0.0796381	-0.0443685	0.120881	0.0165437	0.429534	0.0114625	0.566166	-0.0194755	0.442523	-0.0298253	0.18766	-0.0172	0.494775	0.0302995	0.259857	0.0385373	0.171629	0.0275533	0.327652	0.0510808	0.0662493	0.018173	0.527481	0.0307079
rs35891966	0.0197866	0.550823	-0.0448648	0.143523	-0.0629803	0.11797	-0.0118778	0.745382	0.0629677	0.129029	0.0174053	0.669081	0.0191639	0.655386	0.0147036	0.732975	0.0535443	0.204751	0.0148034	0.736892	0.041204	0.342269	-0.0106377	0.809099	-0.00636873	0.875229	-0.0521583	0.273703	0.0141743	0.693817	-0.0507084	0.131175	-0.062194	0.139732	-0.0203242	0.588997	0.0366252	0.381366	0.0215743	0.63191	0.0433347	0.361963	0.0291069	0.537471	0.0784674	0.094406	-0.0121896	0.800573	0.0106754
rs36004779	-0.0324008	0.0435273	-0.00841852	0.5758	0.000951968	0.961801	-0.0074975	0.677447	0.00811461	0.691292	0.0110282	0.581558	0.00874251	0.677847	-0.00592985	0.780523	0.0104866	0.611712	-0.0551228	0.0111136	-0.050161	0.0189353	-0.0302279	0.164166	-0.0146877	0.459377	0.00680926	0.771507	-0.0418858	0.0164865	-0.0131459	0.429253	-0.00324458	0.877375	0.00265471	0.887429	0.0215738	0.301229	-0.00674017	0.763405	-0.0127513	0.586441	-0.0222507	0.342304	0.0129173	0.576497	-0.0762927	0.00143598	-0.0662343
rs36162392	0.0208302	0.283538	0.020965	0.249876	-0.00948766	0.687746	-0.00741483	0.729336	-0.0294934	0.224961	0.0227731	0.343274	0.0108954	0.669166	-0.0117898	0.646375	0.0391951	0.1172	0.0160893	0.536159	0.00607931	0.812316	0.0395972	0.129517	0.0260775	0.283955	-0.0220454	0.432541	0.0162738	0.439201	0.00186904	0.925479	-0.00317246	0.898471	-0.00365235	0.869365	-0.0064799	0.793199	0.0300959	0.259228	0.0233035	0.406582	-0.0124672	0.656383	0.0229759	0.405097	0.00863617	0.762093	0.00913844
rs3817334	0.00865904	0.482622	0.00710096	0.539282	-0.00961934	0.528807	0.0233611	0.0918017	0.00987062	0.529871	0.0297799	0.0528313	-0.0483246	0.00282292	-0.0292852	0.0739942	-0.053856	0.000716968	0.0224579	0.177241	0.0116229	0.47812	-0.00247971	0.88149	0.0182876	0.235571	0.00343967	0.847925	0.00579022	0.664095	0.00667015	0.598385	-0.00627249	0.69495	0.0163151	0.252984	0.0103151	0.51594	0.0296468	0.082007	-0.0540731	0.00242735	-0.0257443	0.149253	-0.0546087	0.00194929	0.0276965	0.127823	0.0104626
rs3850610	0.0233151	0.0820319	0.0101959	0.41466	-0.0217967	0.186167	-0.0186778	0.212226	-0.0519227	0.00222398	-0.00302839	0.855258	-0.00933331	0.595503	0.0181173	0.307358	0.0230179	0.182838	0.0172935	0.334533	0.0272779	0.121929	0.0155891	0.386787	0.0183777	0.269892	0.00864555	0.656206	0.0208849	0.148498	0.0104017	0.44662	-0.0181772	0.293055	-0.0125167	0.41778	-0.0548391	0.00140901	0.00559936	0.761134	-0.0210903	0.274958	0.0231699	0.229488	0.00324415	0.864725	0.0155041	0.428771	0.0245681
rs3914453	0.038945	0.00099161	0.0197899	0.0778162	-0.0149722	0.310465	-0.0112186	0.402497	-0.0276473	0.0689047	0.0151578	0.308038	0.0277764	0.0758489	0.0133951	0.395993	0.0110669	0.471191	0.00844455	0.59949	0.00329377	0.835215	0.00239923	0.881994	-0.00439867	0.769304	0.0129415	0.457318	0.038498	0.00286709	0.0249923	0.0435615	0.00168938	0.913763	-0.00500786	0.719237	-0.0319079	0.0395219	-4.64917e-05	0.997764	0.0252195	0.147669	0.0339858	0.0498975	0.0162434	0.343709	0.0100158	0.571619	0.00136981
rs39302	0.00125672	0.9339	-0.00829714	0.561878	-0.0109351	0.560848	-0.0416312	0.0146374	-0.00289733	0.880994	0.0151344	0.429075	0.00626952	0.754121	0.0162009	0.424889	-0.00937156	0.63412	-0.00597069	0.771259	-0.00342253	0.865695	0.0451505	0.0294351	-0.00817492	0.669729	0.0125764	0.573059	-0.00668053	0.682157	0.000678831	0.9653	2.27346e-05	0.999074	-0.0319571	0.0674069	0.0152215	0.434202	0.0199896	0.343447	-0.00291541	0.894602	0.0274544	0.212535	-0.0153859	0.478975	-0.00795796	0.72183	-0.0126466
rs407102	-0.00387396	0.777818	-0.00144062	0.911224	-0.0268708	0.113626	-0.0270324	0.0794269	-0.0192539	0.271015	0.030168	0.0794177	-0.0170686	0.343586	-0.0442381	0.0147469	-0.0403746	0.0224125	0.00507509	0.785957	0.00185413	0.919667	0.0318478	0.0875233	0.00225781	0.895704	-0.0127077	0.526597	-0.00868791	0.559567	0.00719015	0.611029	-0.0183138	0.303618	-0.0166561	0.294436	-0.0215437	0.223669	0.0264397	0.165798	-0.0188329	0.343212	-0.0477308	0.0156841	-0.0408755	0.0369154	0.00732166	0.719763	-0.00308711
rs421211	-0.0184348	0.118262	-0.0304715	0.00594828	0.000889552	0.951323	0.00323898	0.806528	0.00146245	0.922391	-0.0149034	0.310496	-0.0253542	0.101327	0.00893884	0.568561	-0.0145979	0.337077	0.0106385	0.502708	-0.0161861	0.300545	-0.000654724	0.967295	0.0246428	0.0967632	0.0154889	0.368314	-0.0154114	0.226128	-0.0323088	0.00761016	-0.00469085	0.757891	-0.00334272	0.805635	0.00455203	0.763653	-0.023336	0.151041	-0.0214606	0.206778	0.00648878	0.703003	-0.0255089	0.12883	0.0187914	0.278322	-0.00215194
rs424029	0.0628601	0.0499233	0.0015708	0.958742	-0.03561	0.369526	0.012794	0.722503	-0.0471535	0.247742	0.0447123	0.26466	0.0812009	0.057368	0.0686613	0.106963	0.0428624	0.305118	0.0273936	0.533049	0.0185587	0.667898	-0.0101043	0.818117	0.0289101	0.485416	-0.0104051	0.826929	0.0670171	0.0520088	0.00794167	0.810574	-0.0392191	0.342039	0.0149984	0.684118	-0.043791	0.285317	0.0264737	0.549364	0.102057	0.0297501	0.0747131	0.104198	0.0560317	0.222593	0.026749	0.57247	0.0345573
rs4294650	0.00528026	0.684922	0.0165212	0.178171	0.00294986	0.855568	-0.0143168	0.330339	-0.00592979	0.722217	-0.000743209	0.963691	0.0091908	0.592471	-0.0156642	0.366318	-0.00114778	0.94566	-0.00131067	0.940818	-0.0301011	0.0833639	-0.00951044	0.591166	-0.000170813	0.991708	0.0260445	0.172949	-0.00380948	0.787535	0.00969436	0.470715	0.0116209	0.494351	-0.0092037	0.544292	0.00257392	0.878984	-0.00120116	0.947121	0.00694641	0.714531	-0.0255009	0.178029	-0.010662	0.568437	-0.00640915	0.740295	-0.0366017
rs4636654	-0.00937233	0.441242	-0.00856804	0.4538	-0.00690455	0.64738	0.00200324	0.883729	0.021273	0.170583	0.0119033	0.434525	0.00530788	0.74012	0.00253777	0.874834	0.00119211	0.939441	-0.0131006	0.427755	-0.0126248	0.437563	-0.00196993	0.905039	-0.015353	0.313498	-0.00556288	0.754792	-0.00502807	0.703565	-0.00451253	0.718319	-0.013087	0.407514	-0.00102278	0.942172	0.0265593	0.0903036	0.0178993	0.288947	0.00350585	0.842832	-0.00744772	0.672277	-0.00454776	0.79402	-0.00803705	0.655842	-0.00670186
rs4690029	0.0192847	0.109021	0.0143385	0.200823	-0.000903976	0.950939	-0.00447388	0.737359	-0.0118071	0.435343	0.0149843	0.313247	-0.00492874	0.754237	-0.00211089	0.894506	-0.00584837	0.705228	0.0352439	0.0278685	0.0319538	0.0428057	-0.00605443	0.707597	-0.00652643	0.660157	-0.00222477	0.898274	0.0249495	0.0551084	0.00928249	0.449351	-0.014099	0.359954	-0.00712419	0.604511	-0.0109897	0.472985	0.0279671	0.0896003	0.00708768	0.682787	0.00400202	0.817714	0.00184591	0.914139	0.0303326	0.0833857	0.0413103
rs4720476	0.0178223	0.154816	0.0168028	0.153398	-0.0166256	0.284447	-0.00969622	0.491676	-0.0107318	0.502587	0.00678528	0.665217	0.00319033	0.846455	0.00485839	0.7697	0.0261464	0.105954	0.0138958	0.411335	-0.00331795	0.842039	0.00986994	0.562147	0.00109742	0.944812	-0.0129829	0.479112	0.0105178	0.436044	0.016235	0.205647	-0.022892	0.157125	-0.00855569	0.55378	0.00234551	0.884317	0.011928	0.490285	-0.00093519	0.958815	-0.0011991	0.946972	0.0281059	0.115323	0.00676023	0.713387	-0.0101615
rs4781499	-8.51053e-05	0.995893	-0.0013394	0.931419	-0.0133304	0.513881	0.00785104	0.671755	-0.0332821	0.113228	-0.0261937	0.207712	0.0164528	0.449683	0.0384055	0.0807284	0.0348543	0.103502	-0.00724529	0.74554	-0.0302005	0.169328	0.0261411	0.246734	0.008587	0.678681	0.0508282	0.036287	-0.00379531	0.831271	-0.00382103	0.822155	-0.00183439	0.931481	0.017253	0.364824	-0.0249828	0.238331	-0.0189062	0.410632	0.0177101	0.4599	0.0385464	0.107377	0.0433967	0.0666731	-0.00472313	0.845757	-0.023751
rs4852252	6.13198e-05	0.995976	-0.000703397	0.951002	0.00265038	0.860022	0.00148061	0.913561	-0.0100165	0.517591	-0.0154724	0.308936	0.00185793	0.907684	-0.00876353	0.587579	0.00833274	0.596168	0.0197179	0.230992	0.00894441	0.580939	-0.0122461	0.457799	-0.0106334	0.485661	-0.0158504	0.373247	0.00144706	0.912185	-0.00282801	0.821205	0.00720008	0.646955	0.0121846	0.385226	-0.0122196	0.434396	-0.0222612	0.1861	0.0172428	0.327636	-0.00262398	0.88139	0.00846377	0.626481	0.010466	0.559728	0.00556555
rs4925114	-0.00878384	0.480767	-0.00828818	0.474144	0.00267905	0.860987	0.0135978	0.327419	-0.00123016	0.937823	0.0182388	0.236634	0.00349128	0.830217	-0.0110247	0.502666	-0.0412617	0.00992791	0.000587765	0.971891	0.0047947	0.770175	0.0384902	0.0213005	-0.00909496	0.555298	-0.00920045	0.60925	-0.0115773	0.393175	-0.000312616	0.980508	0.00651304	0.686532	0.0258563	0.0726966	0.0101951	0.52537	0.0246621	0.152404	-0.00585582	0.745999	-0.0084002	0.641771	-0.0494321	0.00561517	0.00319374	0.861831	-0.00239576
rs516902	-0.00629228	0.605877	-0.00759605	0.504449	0.0161838	0.281313	-0.00297725	0.827128	0.0119059	0.441614	0.00706332	0.64199	-0.000390992	0.980404	0.0179651	0.262641	-0.0143248	0.360227	-0.00353292	0.829756	-0.0127861	0.429393	-0.00255479	0.876709	0.00318621	0.834874	0.0180856	0.308045	-0.0053808	0.683983	0.0028202	0.821454	0.00611518	0.698703	-0.000148655	0.99159	0.0150725	0.337402	0.00931853	0.581018	-0.00836922	0.634385	0.0245136	0.161461	-0.0192412	0.268397	-0.00930536	0.6047	-0.0136447
rs527825	0.00901327	0.446899	0.00566152	0.6116	0.0242346	0.0987357	-0.00397688	0.765467	-0.0132789	0.379699	-0.00272747	0.85399	-0.00318706	0.837623	-0.00373998	0.811602	0.0155509	0.308319	-0.0162773	0.311814	-0.00556303	0.725472	0.0281222	0.0808573	-0.000738085	0.960493	0.00902193	0.603311	0.00359939	0.780068	-0.00345191	0.778363	0.021316	0.166904	-0.00121172	0.929924	-0.00185062	0.903942	-0.00371163	0.821687	-0.00742575	0.667115	-0.00042868	0.980123	0.00742332	0.66271	-0.018279	0.299689	-0.00517445
rs55985762	-0.0181548	0.219759	0.00405021	0.770992	-0.0234812	0.199026	0.00889445	0.592095	0.0195285	0.299282	-0.000933303	0.959693	0.0181414	0.350596	0.00525419	0.789178	0.0173869	0.360676	-0.0180223	0.367999	-0.0452659	0.0214683	-0.00449681	0.822939	-0.00143992	0.938672	0.00586282	0.78637	-0.00984277	0.540124	0.0221799	0.147455	-0.0229827	0.231952	-0.0105873	0.537477	-0.00327526	0.863871	0.0107436	0.601766	0.0250972	0.245043	0.0173943	0.420817	0.0303309	0.153227	-0.00851209	0.697568	-0.0405067
rs56150095	-0.000418067	0.971849	-0.00944761	0.397402	-0.00194377	0.894837	-0.013031	0.328959	0.0184007	0.224278	0.0142575	0.337306	0.0106383	0.496847	0.00507572	0.748127	-0.00303449	0.843339	0.00456102	0.776769	0.00899443	0.570051	-0.0147959	0.359175	-0.0168756	0.257833	0.00172837	0.920906	0.00128818	0.920344	-0.0106735	0.385595	-0.00138405	0.928728	-0.00834494	0.54594	0.0152976	0.320029	0.0170804	0.301695	0.00742457	0.668667	0.00483538	0.780406	-0.000270716	0.98738	-0.00573762	0.745143	0.014192
rs56151722	-0.00512924	0.720644	0.00356945	0.789793	0.0169849	0.335977	-0.0272296	0.0892764	0.000117593	0.994835	-0.000223897	0.989976	-0.0405056	0.0306213	-0.017283	0.363332	-0.0255519	0.165869	0.00085489	0.964808	0.00221849	0.907405	-0.00983486	0.61285	-0.0120856	0.503856	0.0210842	0.313964	-0.0141785	0.361405	0.00706841	0.630314	0.0152249	0.411148	-0.0262627	0.112327	0.0143295	0.435868	-0.0102019	0.60588	-0.0432168	0.0370039	-0.0113749	0.58334	-0.0243091	0.235378	0.00211452	0.920581	0.00573442
rs5758605	0.0145404	0.244519	-0.00525304	0.652425	-0.0115064	0.4539	-0.00288679	0.835992	-0.0174405	0.270113	0.0313727	0.0426304	-0.00344537	0.833083	-0.0169212	0.305783	0.0117011	0.466576	-0.0101418	0.546617	0.0268388	0.104963	0.0167015	0.32036	-0.00543725	0.725956	-0.0193326	0.286158	0.00901831	0.506371	-0.000183593	0.988603	-0.0157575	0.331059	-0.00348962	0.809466	-0.0165193	0.305136	0.0266496	0.122599	-0.00477327	0.792263	-0.0227286	0.209766	0.0135328	0.449693	-0.0158779	0.3898	0.023187
rs59663815	0.00256761	0.851122	-0.00560633	0.661591	-0.00585723	0.728105	0.0044918	0.769064	-0.0391971	0.0238111	-8.00983e-05	0.996258	-0.0114842	0.522764	-0.017861	0.324101	0.0157065	0.373776	-0.0152002	0.412029	-0.0200023	0.272739	0.0128746	0.486133	0.0149638	0.382719	0.00349032	0.860956	-0.00297739	0.840575	0.00132464	0.924806	0.0132848	0.45151	0.00933877	0.55341	-0.0422722	0.0158989	-0.00705183	0.709221	-0.0193678	0.329401	-0.0308419	0.118738	0.0136784	0.485071	-0.0132197	0.512439	-0.0358194
rs61104616	0.0251865	0.034002	0.00770833	0.48937	-0.00419512	0.775029	0.0266031	0.0458111	0.00158379	0.916556	0.0131065	0.376471	0.0115571	0.460022	0.0202091	0.201569	0.00977511	0.525234	0.00639322	0.689751	0.0140732	0.372006	0.0154499	0.336085	0.0211353	0.153142	0.00730123	0.673569	0.0373946	0.00366486	0.0118888	0.330378	0.00277816	0.856637	0.0338659	0.0135969	0.000242423	0.987352	0.0196	0.232283	0.0103079	0.550144	0.0146387	0.395959	0.00774901	0.649398	0.0154768	0.376608	0.0246241
rs6124077	0.00364597	0.777253	0.00575008	0.634677	-0.00114916	0.942696	-0.00999278	0.491068	-0.0059031	0.719975	0.00397365	0.805314	-0.0127366	0.453282	0.0206711	0.227974	-0.0283006	0.0896644	0.0193501	0.266043	0.00333951	0.845398	0.0148705	0.396211	-0.000705405	0.965352	0.0103597	0.582833	-0.00286165	0.835985	0.00800191	0.543501	0.00218664	0.895501	-0.0147272	0.321631	0.00105083	0.949384	-0.00986827	0.578274	-0.0172944	0.353504	0.0105648	0.570633	-0.0206196	0.26213	0.0168483	0.371759	0.0033084
rs61544985	0.00931152	0.435696	-0.00607441	0.588614	-0.00294794	0.84217	0.0168696	0.209471	-0.0032093	0.833199	0.00191763	0.897884	-0.000847031	0.957055	0.0035545	0.822637	-0.0192368	0.213327	0.00941267	0.558452	-0.0176453	0.265376	0.00227266	0.888518	0.0114971	0.44261	0.00901174	0.606117	-0.00121128	0.925026	-0.00785271	0.520912	0.00463433	0.763942	0.0153023	0.266758	-0.00792975	0.605251	-0.00888395	0.589343	-0.0155855	0.365993	-0.00524427	0.760592	-0.024643	0.147991	0.00605176	0.729144	-0.0231344
rs62037363	-0.00131775	0.915372	0.00750954	0.520848	-0.0196375	0.201581	0.00886541	0.525514	-0.00655078	0.679184	0.00237077	0.878912	-0.000389179	0.981089	-0.00904872	0.583748	-0.00806282	0.616464	0.000277376	0.986752	0.00161033	0.922052	-0.00297316	0.860375	-0.0160775	0.306171	0.00376223	0.836281	-0.00614809	0.64756	0.00780084	0.542536	-0.0172836	0.283539	-0.00183403	0.898605	0.00289917	0.856421	-0.00331159	0.847447	-0.00987877	0.585005	-0.00625871	0.728125	-0.0101046	0.570441	-0.000321157	0.985952	0.000291037
rs62047280	0.00762797	0.610845	-0.00575096	0.682273	0.0162078	0.382292	0.0302156	0.0728293	-0.0144866	0.447962	0.0134754	0.470847	0.0236093	0.230126	0.0195102	0.326771	0.0195342	0.312297	0.0221599	0.272569	0.00235796	0.905614	-0.00558399	0.782328	-0.0164527	0.377015	-0.00267304	0.902398	0.0141778	0.381952	0.000453072	0.976509	-0.0067048	0.730659	0.0213462	0.219916	-0.024958	0.197078	0.0342366	0.0989883	0.028974	0.180847	0.0264723	0.221675	0.0166137	0.436949	0.0308174	0.16406	0.0166842
rs62236533	-0.0223618	0.324785	0.00223716	0.916284	0.00644204	0.817245	-0.028999	0.251744	-0.0074076	0.7967	0.00499114	0.859953	-0.0228899	0.438995	-0.0101462	0.734374	0.00152796	0.958069	-0.0542354	0.075799	-0.0497324	0.098084	-0.0448498	0.141428	0.0165635	0.552893	0.0428561	0.192085	-0.0367356	0.137865	-0.00787309	0.737012	-0.00173554	0.95285	-0.0304517	0.245125	0.00039029	0.989324	0.00368906	0.906952	-0.010488	0.749801	-0.0156649	0.634082	-0.00391568	0.904086	-0.0567372	0.091985	-0.0581507
rs62253086	0.0644274	0.00228596	0.047473	0.0173151	-0.0864586	0.00103081	-0.0285325	0.232867	-0.0736413	0.00657248	0.0273409	0.303232	-0.018539	0.510082	0.0213285	0.450423	-0.0205276	0.457401	0.0574965	0.0456959	0.0891557	0.00163432	-0.0127538	0.658786	0.00280491	0.91667	0.00686506	0.825031	0.0834384	0.000293964	0.0479408	0.0294461	-0.0899991	0.00126049	-0.012327	0.620942	-0.0916578	0.000938529	0.0312541	0.294949	0.00320652	0.918312	0.0447141	0.147402	0.0031738	0.917572	0.075738	0.0168131	0.108485
rs62358087	0.00129669	0.931768	-0.000600157	0.966566	0.00914747	0.627295	0.0385063	0.0243728	0.0266685	0.169035	0.0112264	0.55515	-0.0127513	0.525013	0.00742947	0.71358	0.0221812	0.260152	0.0294699	0.148942	0.0481517	0.0165702	0.000472709	0.981767	0.0221791	0.247896	0.00650417	0.770401	0.00472896	0.774271	-0.00276266	0.861733	-0.00300559	0.879877	0.0394684	0.0262733	0.0466381	0.018283	0.00953977	0.654497	-0.0226481	0.310227	-0.0161276	0.469708	0.0218396	0.321457	0.0444234	0.0481753	0.0555789
rs62439690	0.0129931	0.335438	0.0096234	0.449818	-0.0064822	0.700742	-0.0133188	0.384314	-0.0174677	0.314479	0.0186395	0.272847	-0.00784071	0.659042	0.0264263	0.140643	0.0234148	0.179043	0.0237894	0.194672	0.0146145	0.418342	-0.0146927	0.425357	0.0145617	0.395249	0.031221	0.116358	0.0130912	0.374617	0.00886142	0.5292	-0.0120175	0.501046	-0.0164117	0.303306	-0.00885932	0.617802	0.0200661	0.291066	-0.00630705	0.749867	0.0313155	0.112919	0.0316294	0.10468	0.0182468	0.36682	0.0154937
rs66886492	0.0122084	0.53373	0.0217629	0.231364	-0.0208678	0.375848	-0.013233	0.536203	-0.0051911	0.830602	0.0157441	0.511172	0.00430681	0.865585	0.0200202	0.435236	0.0353069	0.156963	0.00699005	0.789058	-0.00805484	0.754158	0.0297315	0.254414	0.00846374	0.72733	-0.0331278	0.23805	0.0026488	0.900731	0.00308772	0.877225	-0.0125388	0.613958	0.00597136	0.787951	0.00828254	0.737487	0.0138422	0.603452	0.014341	0.609474	0.0096415	0.730973	0.0180326	0.513596	0.00441315	0.87757	-0.0019767
rs6760964	0.0109082	0.364154	0.0115089	0.307602	-0.00878883	0.554132	-0.00787237	0.559172	0.0022355	0.883718	0.0148711	0.320985	0.0152908	0.333725	-0.0227653	0.153551	0.0110884	0.475135	-0.00390352	0.809681	0.0179559	0.260355	0.00316172	0.845448	0.0211933	0.15945	0.00611943	0.726065	0.0185567	0.153216	0.00962635	0.436238	-0.0241275	0.122435	-0.0241283	0.0833898	-0.00823381	0.595611	0.0243483	0.143813	0.0134663	0.439888	-0.0298553	0.0863379	0.00391276	0.820206	0.0140202	0.42977	0.0373435
rs6778735	-0.0167826	0.166975	-0.00779693	0.492836	-0.0125906	0.399865	-0.0197798	0.144997	-0.000213644	0.988927	-0.0185035	0.221393	-0.00885712	0.579525	-0.00915705	0.569491	-0.00987096	0.527764	-0.00882018	0.588567	-0.00402346	0.802024	0.00546094	0.739408	-0.00638767	0.674721	0.0222598	0.20818	-0.0252713	0.0542649	-0.0171801	0.168096	-0.00979594	0.532944	-0.00275258	0.844363	0.0170344	0.275113	-0.0269192	0.109188	-0.0114458	0.517041	-0.0186637	0.288252	-0.0110165	0.525146	-0.00747066	0.674481	-0.00508125
rs6819372	0.0117912	0.314715	0.00547536	0.618154	0.00366066	0.800205	-0.00580796	0.658076	-0.0108829	0.464851	-0.00629992	0.6655	-0.00294022	0.848142	-0.0112669	0.46881	0.00432176	0.774596	0.00480353	0.760554	0.0198038	0.20186	-0.00019881	0.989977	0.0280636	0.0552014	0.0430882	0.011573	0.0135283	0.290489	0.0100531	0.406724	0.00804818	0.598184	-0.00823513	0.545732	-0.0121151	0.424897	-0.00782966	0.630518	-0.00720473	0.672907	-0.00541672	0.751409	0.0044413	0.792262	0.00837998	0.628486	0.0233749
rs7010173	0.0227409	0.0627183	0.00480185	0.674512	-0.0341395	0.0233468	-0.01256	0.358191	0.00403288	0.794835	0.032008	0.0351695	0.0149487	0.352712	0.01826	0.259308	0.0350946	0.0262235	-0.00648461	0.693179	-0.000134321	0.993377	-0.0025821	0.875704	-0.00117851	0.938517	-0.031398	0.0777198	0.0174482	0.186655	-0.00405856	0.745895	-0.0285477	0.0697855	-0.0134505	0.338752	-0.00607538	0.698008	0.0273679	0.103965	0.0159771	0.367407	0.00107213	0.951549	0.023932	0.171163	0.00140838	0.937352	-0.00349058
rs7038525	-0.0230161	0.127501	-0.00144974	0.919274	-0.0216539	0.250249	-0.0143919	0.399767	0.00630565	0.744931	0.0156288	0.410611	-0.00168542	0.932836	0.0315043	0.118915	0.000984102	0.959927	-0.0224804	0.27303	-0.0128975	0.523454	0.0467034	0.0233379	0.0144568	0.44919	-0.00977667	0.659865	-0.0204871	0.216818	-0.00615578	0.697253	-0.0363001	0.0687104	-0.0144462	0.417099	-0.00111033	0.955325	0.0214575	0.313493	0.00840633	0.705682	0.0338371	0.128182	0.00693029	0.751585	-0.0304513	0.181314	-0.0103134
rs704444	0.00825866	0.487439	0.00692015	0.538285	-0.0213012	0.149778	-0.0107785	0.42202	-0.0276462	0.0695516	0.0167068	0.263725	0.0137127	0.383035	-0.00134735	0.932188	-0.00273246	0.859379	0.000309859	0.984697	0.017528	0.270387	0.00418152	0.796822	0.000881715	0.953227	-0.0141676	0.417426	0.0102372	0.427419	0.00389775	0.751925	-0.0124148	0.423697	-0.00570463	0.680408	-0.0177173	0.250749	0.0177479	0.283917	0.0129525	0.454977	-0.00684526	0.692004	0.00115296	0.946231	0.00581347	0.742523	0.0271555
rs71413877	0.0264151	0.4679	0.0106161	0.755785	0.0134601	0.767194	-0.0346256	0.401487	0.0261311	0.576179	-0.0375415	0.415809	-0.00713163	0.882071	0.0403661	0.398451	-0.0553431	0.236858	0.0217851	0.661695	0.0231598	0.636477	0.036689	0.461072	-0.0406537	0.380031	-0.0548587	0.306561	0.00615687	0.8739	0.0183672	0.625152	-0.0270917	0.570596	-0.0338773	0.427091	0.00108586	0.98174	-0.037856	0.460922	0.00389161	0.941702	0.0405008	0.439398	-0.00777884	0.881347	0.049242	0.359374	0.0128109
rs7186834	-0.00695222	0.559877	-0.0183311	0.10302	-0.00499733	0.736462	-0.0109698	0.415697	0.00649768	0.670881	-0.00244719	0.870231	0.0158572	0.313653	-0.00913052	0.566596	-0.000626328	0.967702	0.0242133	0.133819	0.0241163	0.129529	-0.00453532	0.779979	0.00325243	0.82865	-0.0218591	0.211502	-0.00656257	0.609092	-0.0142038	0.247372	-0.00914385	0.555311	-0.0197804	0.153098	-0.0014667	0.924186	0.0154979	0.349238	0.0110749	0.522456	-0.00305096	0.860346	0.00858755	0.615438	0.0266882	0.128412	0.0235168
rs72801843	-0.0248087	0.0712747	4.06656e-05	0.997498	-0.0137249	0.420854	-0.000555395	0.971365	9.17898e-05	0.995827	-0.00768406	0.655981	-0.022001	0.224665	-0.0286465	0.117761	-0.00574284	0.746946	-0.0288563	0.122576	-0.030995	0.0920273	0.022298	0.234211	-0.0101441	0.559785	-0.0380396	0.0598227	-0.0302028	0.0441437	-0.00274341	0.847851	-0.0184538	0.304856	-0.0255463	0.111579	0.0177514	0.320671	-0.00270055	0.888363	-0.0105586	0.598992	-0.0352466	0.0796578	9.51563e-05	0.99617	-0.0273915	0.182012	-0.0325724
rs73189617	0.0186225	0.160666	0.0274169	0.0276845	0.0142342	0.385808	-0.0159067	0.285429	-0.0203551	0.228184	0.00835466	0.614594	0.0114157	0.513361	0.0203352	0.248569	0.00132217	0.938601	-0.0368294	0.0401326	-0.00350542	0.8428	0.00211802	0.906012	-0.00597098	0.719016	-0.0183	0.343785	0.018276	0.205242	0.0305197	0.0261885	0.00555088	0.747962	-0.0212907	0.167217	-0.0321748	0.0608548	0.0146173	0.428557	0.0183545	0.343315	0.0266671	0.168174	0.00357122	0.851982	-0.0332017	0.0919735	-0.0165851
rs7365380	-0.0106282	0.367424	-0.0232146	0.0362186	-0.0231405	0.113144	0.00649184	0.624572	-0.00344813	0.818738	0.0105824	0.472141	-0.00337077	0.828176	0.00333394	0.830958	-0.0304991	0.0454642	0.0159855	0.314501	-0.00123888	0.936875	0.0145327	0.363243	-0.0143947	0.329299	-0.016422	0.339999	-0.0106788	0.401492	-0.0192982	0.110446	-0.0165219	0.279304	0.00664861	0.625901	0.0037051	0.807231	0.0198479	0.222614	-0.0124773	0.464558	0.0105133	0.53543	-0.0338137	0.0444322	0.0140583	0.416942	-0.00470369
rs743134	-0.00414559	0.73141	-0.00190386	0.866453	0.00669217	0.654328	-0.0171494	0.205878	0.0176664	0.250758	-0.00406004	0.787602	0.0128524	0.41724	0.00630274	0.693704	-0.00696124	0.654751	0.0157694	0.333986	0.00658908	0.681879	0.0405683	0.01286	-0.00254409	0.865931	-0.0157134	0.371328	-0.00549612	0.674563	0.00359979	0.772506	0.000182766	0.990719	-0.0211866	0.130666	0.011742	0.452026	-0.0170866	0.308109	0.00466564	0.790348	0.00526421	0.763966	-0.00856432	0.620991	0.0115451	0.518689	0.00298769
rs74370218	0.00942602	0.444565	0.006002	0.605018	-0.00159852	0.916915	-0.016109	0.246678	-0.0227141	0.149684	-0.00299926	0.846082	0.018038	0.266507	0.0404597	0.0134914	0.0233218	0.142694	0.0180852	0.277821	0.0155518	0.343365	0.0217022	0.194903	-0.0326713	0.0354573	-0.00122077	0.946079	0.00588284	0.658887	0.00843832	0.506036	0.00103521	0.94852	-0.0121223	0.396972	-0.00567265	0.721792	-0.0102796	0.547984	0.00486842	0.785486	0.0367426	0.0395341	0.00765929	0.663709	0.0266515	0.142597	0.0136351
rs74796574	0.0229372	0.502092	0.0179192	0.575688	0.0135003	0.74688	0.00736915	0.846118	0.0330937	0.442147	-0.0201017	0.637142	0.027206	0.540045	0.0142393	0.750557	0.0242521	0.577241	-0.0759887	0.104987	-0.0236455	0.608222	-0.014809	0.746073	0.0154782	0.712484	0.0680797	0.167642	0.00135233	0.970947	0.000130666	0.997032	-0.0185633	0.674803	-0.00955984	0.808819	0.0202982	0.644601	-0.0248581	0.601271	0.0292582	0.550072	0.0211314	0.667611	0.0302654	0.531199	-0.0717453	0.161075	-0.0185384
rs7487854	0.00204603	0.93348	0.0106545	0.637387	0.0117672	0.694854	-0.0169621	0.53352	0.0446877	0.147787	0.0477008	0.113822	-0.00137987	0.96542	-0.0188301	0.557349	-0.0196264	0.528202	-0.0139158	0.671467	-0.0237346	0.462006	0.00130635	0.968096	0.0144162	0.63209	0.00751386	0.831036	-0.0032538	0.901008	0.0181138	0.462894	0.0197345	0.530309	-0.00101319	0.971228	0.0497134	0.111704	0.0621583	0.0616859	0.00982692	0.777657	-0.00740184	0.831432	-0.0133307	0.695782	-0.01199	0.73531	-0.0308907
rs74944275	-0.00642629	0.847213	-0.00886215	0.776369	-0.000605572	0.988139	0.0451165	0.222409	-0.00301314	0.942867	-0.0485256	0.238977	0.0132302	0.763847	-0.0591539	0.185104	0.00692483	0.872965	-0.0375759	0.396843	0.00837335	0.847891	-0.017477	0.6969	0.0432609	0.291933	0.0676407	0.158864	-0.00782398	0.825138	-0.0280433	0.409374	-0.00375578	0.929127	0.0515393	0.171668	0.0111027	0.791476	-0.0500356	0.271907	0.0181248	0.706853	-0.0516965	0.280957	0.0230693	0.626516	-0.0722841	0.131871	-0.00408361
rs750472	0.0118765	0.32442	0.00432358	0.703298	0.00790424	0.59583	-0.00886359	0.512461	-0.00688647	0.653563	0.00496797	0.742532	-0.00937908	0.556071	0.00959764	0.550573	0.00817892	0.600573	0.0206515	0.204864	0.0185369	0.247767	0.00452153	0.782906	0.0090313	0.553689	0.0282546	0.11004	0.00996874	0.443931	0.00107354	0.931001	0.010953	0.481332	-0.0118511	0.393571	-0.011384	0.461708	0.00395428	0.812901	-0.0123082	0.482168	0.00308175	0.860105	0.00300464	0.86173	0.0170927	0.335572	0.0173316
rs7534501	-0.0113531	0.336797	0.00911862	0.410686	0.0129816	0.373403	-0.00240231	0.856009	0.00754657	0.615302	-0.0154997	0.293304	0.000521118	0.973244	-0.0235085	0.133986	-0.00743132	0.626772	-0.00938517	0.555271	-0.00197134	0.899846	0.0156623	0.327575	0.00242674	0.8692	0.00922309	0.592424	-0.0127462	0.324087	0.00921049	0.451668	0.0243526	0.113921	-0.00571899	0.677622	0.00756961	0.621169	-0.0146921	0.372314	-0.00723501	0.675649	-0.0215878	0.211042	-0.00741674	0.664591	-0.0200663	0.251836	-0.0112568
rs7583067	0.00323193	0.824586	-0.0118442	0.387138	-0.00421068	0.815891	-0.0341221	0.0375952	-0.0130843	0.48246	0.0117955	0.518444	0.0042304	0.826809	0.000326946	0.986531	-0.0239213	0.205698	0.00227797	0.907931	0.0232939	0.229512	0.00641866	0.745343	-0.0146493	0.425523	-0.0308262	0.147894	0.010054	0.52159	-0.0103418	0.488272	0.00585964	0.75568	-0.0149879	0.372493	-0.00862323	0.644977	0.0152914	0.447693	0.00829296	0.695907	-0.00598413	0.775493	-0.0139898	0.501784	0.0118479	0.579299	0.0316982
rs7590388	0.000751706	0.949671	0.00545633	0.625866	-0.0215295	0.142658	-0.00859359	0.519088	-0.00442257	0.769958	-0.0246776	0.0971588	0.00572254	0.715216	0.0116752	0.460572	0.0148881	0.332716	0.0346069	0.0314094	0.0249638	0.114864	0.00644854	0.689439	0.0135961	0.359922	0.020174	0.245758	-0.00447351	0.728487	-0.0016726	0.891791	-0.0147223	0.341211	-0.00229379	0.868082	-0.00241084	0.875455	-0.0416927	0.0118729	-0.00182938	0.915856	0.0166083	0.336083	0.0124999	0.463627	0.0430335	0.0145376	0.0315017
rs7599488	0.00899247	0.448591	0.00120445	0.913561	0.0118879	0.41557	0.00350247	0.791597	0.00957999	0.524417	0.0140168	0.342759	0.0204628	0.188745	0.0247367	0.115073	0.00457754	0.764209	0.0102645	0.519455	0.0273063	0.0817201	-0.00830761	0.604083	0.0476731	0.00120936	0.0338308	0.0499786	0.0112164	0.384007	0.00961659	0.42965	0.00995631	0.517565	-0.00240099	0.86126	0.00544471	0.722102	0.0157684	0.338031	0.0251003	0.144916	0.0220177	0.19952	0.00473425	0.779921	0.0304517	0.0822567	0.0315976
rs7609050	-0.00552278	0.64434	-0.00123168	0.912594	-0.00523629	0.722788	0.0142252	0.288461	0.0143456	0.34524	-0.022142	0.135791	0.0154469	0.32538	0.0182776	0.248283	-0.00331885	0.829611	-0.0397572	0.013415	-0.0321416	0.0423871	-0.0339006	0.0353891	0.011144	0.455319	0.0410041	0.0182892	-0.0101928	0.432208	0.000580797	0.962375	-0.0206086	0.182726	0.00113804	0.934349	0.0198388	0.196955	-0.0266919	0.104884	0.0165209	0.340776	0.0162787	0.347459	-0.0114295	0.504296	-0.0334072	0.0572619	-0.0191217
rs7618519	0.0152026	0.198898	-0.00636933	0.567096	0.00362194	0.80489	-0.00419832	0.752361	-0.011578	0.443072	-0.00294892	0.842309	0.0275208	0.0780956	-0.0135705	0.387373	0.00648654	0.671645	0.0155026	0.334175	0.0143412	0.364089	-0.00018996	0.990573	-0.0199628	0.179257	0.0111739	0.518694	0.0129794	0.310645	-0.00643615	0.597804	-0.0181667	0.236293	-0.028643	0.0364143	-0.0179207	0.239891	-0.00225046	0.891027	0.020542	0.233424	-0.00786889	0.646016	-0.00380981	0.822595	0.0178986	0.305498	0.0233845
rs7633520	0.00412719	0.754293	0.00308976	0.803889	0.0127958	0.43413	-0.00273452	0.853835	-0.0158752	0.345628	-0.0122806	0.457433	0.00477659	0.783773	-0.0273015	0.121364	0.000903272	0.957992	-0.0058906	0.741398	0.0177762	0.311675	0.00335188	0.851984	-0.0175679	0.287843	-0.0149988	0.438189	0.00595441	0.678685	0.00539774	0.694615	0.0128624	0.456559	0.0046819	0.761429	-0.011819	0.490964	-0.00424312	0.818016	0.00285219	0.882693	-0.0298568	0.122821	0.00554137	0.77199	-0.00586908	0.765116	0.014472
rs7699872	0.0210888	0.0926335	-0.0165192	0.163656	0.0010476	0.946618	-0.039948	0.00489971	-0.0315068	0.0505591	0.0211068	0.180182	-0.0374983	0.0237918	0.00272849	0.870756	0.0120342	0.460749	0.00215558	0.898904	0.00456674	0.784592	-0.00207719	0.903682	0.0240326	0.130253	0.0088777	0.631199	0.0134459	0.321964	-0.023739	0.0686964	0.0261999	0.111103	-0.027747	0.0587621	-0.0123435	0.450232	0.0153428	0.381264	-0.0404893	0.0273728	-0.00134343	0.941604	0.00364755	0.840436	0.000801707	0.965548	0.00838169
rs77482156	0.0480877	0.0664335	0.0400775	0.102098	0.0473032	0.138381	0.0323199	0.264325	-0.0149712	0.648701	0.0295252	0.362344	-0.0127936	0.710513	0.0405211	0.243032	0.0516602	0.12485	-0.000745265	0.983002	0.0333735	0.332378	0.047839	0.172164	0.0124144	0.702276	-0.0313925	0.404339	0.0430534	0.124213	0.0185922	0.482865	0.0641161	0.052074	0.0378053	0.199418	0.0128851	0.694707	0.0197313	0.577182	0.00317416	0.932376	0.0359125	0.336275	0.0498889	0.174118	-0.011997	0.749869	0.0296898
rs7763264	0.0105048	0.390654	0.0204255	0.0761295	-0.0243355	0.107329	-0.0169534	0.216668	-0.0159941	0.304304	0.020685	0.175953	0.00112388	0.944413	0.000844218	0.958477	-0.00466598	0.76749	-0.00750441	0.650779	0.0155116	0.341847	0.036745	0.0268675	-0.0197321	0.197291	-0.0208294	0.244524	0.0238907	0.0714595	0.0226425	0.0712245	-0.0358502	0.022797	-0.0361158	0.0102286	-0.0214778	0.170455	0.0395166	0.0189081	0.00531238	0.764177	0.0104301	0.554508	-0.00460697	0.791754	-0.00482076	0.789432	0.0226365
rs78066960	-0.0187944	0.145254	0.000505715	0.966685	-0.00880311	0.580974	0.00652932	0.652047	0.0178967	0.275846	-0.017015	0.291452	0.0168068	0.321096	0.0209144	0.222476	0.00995482	0.550431	-0.00336899	0.846604	-0.00221132	0.897289	-0.00431857	0.804962	0.00191937	0.905662	-0.0103785	0.582087	-0.0203579	0.147004	-0.000930649	0.944313	0.00507854	0.762093	0.011866	0.428239	0.030652	0.0661105	-0.0162177	0.366637	0.0139977	0.454547	0.00734556	0.695278	0.0102728	0.579185	-0.00276514	0.88522	-0.0018792
rs7814022	-0.00686315	0.558757	-0.0109181	0.32178	0.00375739	0.796079	0.00222058	0.866435	0.0105728	0.480065	-0.0105059	0.474197	-0.0220852	0.152208	0.00354403	0.819768	-0.014929	0.324197	0.0279076	0.0783052	0.0223957	0.151462	0.0153463	0.336161	0.00059729	0.967758	-0.00582173	0.734641	0.00205034	0.871938	-0.00298534	0.804566	-0.00196874	0.897195	-0.0107726	0.428598	0.00310675	0.837461	-0.00766455	0.637643	-0.0234157	0.167863	0.0158483	0.349469	-0.011684	0.485511	0.0341938	0.0490247	0.0212889
rs7873907	-0.0144034	0.22491	-0.00735305	0.507758	-0.0106085	0.467678	0.00206941	0.876029	0.0248406	0.098746	0.0132074	0.371496	0.0290604	0.0621518	0.0146278	0.353189	-0.0126755	0.407258	-0.0324599	0.0424832	-0.0132392	0.400849	-0.0297889	0.06197	0.0242397	0.100638	0.0129964	0.449595	-0.0125298	0.328391	-0.0053523	0.659062	-0.00719223	0.638038	0.0112882	0.408449	0.0284421	0.0612815	0.00555741	0.733879	0.0356383	0.0377547	0.019027	0.266355	-0.0178689	0.29059	-0.0356153	0.0410698	-0.0181065
rs79245415	0.00839145	0.719698	-0.0259789	0.240693	0.0188121	0.521808	0.0459206	0.0847533	-0.024032	0.427198	-0.00127466	0.965481	-0.0120214	0.697432	0.0278029	0.373377	-0.0207332	0.495101	-0.00729194	0.817834	-0.00615113	0.84359	-0.0156358	0.623908	0.0343482	0.250082	-0.0123432	0.719457	-0.0115939	0.647728	-0.0344656	0.154651	0.0145864	0.635283	0.0486339	0.0763542	-0.0240059	0.433175	-0.00172178	0.957862	-0.0234623	0.491025	-0.00409648	0.904357	-0.0417008	0.215473	-0.0173402	0.615033	-0.0246639
rs79582714	0.0100571	0.601084	-0.00772588	0.666217	-0.0040222	0.864103	-0.0195655	0.35887	0.00031489	0.989627	0.0242241	0.308197	0.0106447	0.672373	0.0210743	0.407779	-0.032314	0.193299	0.0294332	0.251668	0.0156701	0.535572	0.0573328	0.0266804	-0.035958	0.133503	-0.0131416	0.637794	0.0152303	0.460934	0.00681901	0.727727	-0.015952	0.517588	-0.0107388	0.625569	-0.00987102	0.68751	0.0387251	0.141099	0.0167578	0.546571	0.0100483	0.717159	-0.0255496	0.353157	0.0286118	0.302863	0.0158907
rs7963801	0.0328948	0.00784265	0.0167809	0.148864	-0.0166841	0.275786	-0.00970007	0.485108	-0.0495223	0.0016773	0.0334028	0.0311336	0.0113374	0.486631	0.0241247	0.143324	0.0268942	0.0932892	0.00605817	0.717168	0.0234526	0.154441	0.00936289	0.578775	-0.0318444	0.0411196	-0.011947	0.511751	0.0388885	0.00363086	0.0155057	0.222628	-0.00602288	0.707092	-0.00518235	0.717232	-0.0493207	0.00196562	0.0361373	0.0350398	0.0168762	0.347484	0.0167563	0.35074	0.0179867	0.311059	0.0148505	0.415668	0.0167185
rs7978070	0.00860025	0.470086	0.00504291	0.653122	-0.00370772	0.801567	-0.00976888	0.465916	-0.0459163	0.0025326	-0.0155178	0.297186	-0.0111531	0.476451	0.0173094	0.273359	0.00999408	0.516062	-0.00930919	0.562232	0.00631375	0.689805	0.0117234	0.467611	-0.00188361	0.899939	0.00356168	0.837684	0.00551927	0.66795	-0.000370559	0.975917	0.00368323	0.811488	-0.0116168	0.399661	-0.0364615	0.017762	-0.018241	0.268714	-0.00379118	0.825914	0.0192607	0.262345	0.0192808	0.257061	-0.0180124	0.304414	-0.00727655
rs7998050	-0.00536871	0.669297	-0.00329607	0.783138	-0.00984871	0.530623	-0.000419381	0.976527	-0.0297436	0.0656895	-0.000267001	0.986625	-0.00897845	0.591012	-0.00579351	0.731316	-0.00283705	0.862571	-0.00406514	0.811937	-0.0114804	0.494889	0.00339788	0.844661	0.0174799	0.275884	-0.0128136	0.493108	-0.00780821	0.567625	-0.009342	0.477773	-0.00969602	0.556677	-0.0112499	0.444957	-0.0297021	0.069988	-0.000753776	0.966009	-0.00879595	0.633909	-0.0138194	0.454487	-0.0145421	0.424536	-0.00263487	0.88813	-0.0133148
rs80170948	0.03569	0.256027	0.0482794	0.105775	-0.0313174	0.427407	-0.0205281	0.565775	-0.0451672	0.265679	-0.0172798	0.664542	0.0198404	0.6362	-0.0168798	0.689498	-0.0301307	0.46496	-0.0125081	0.77091	0.00358949	0.932341	0.0822259	0.0575458	-0.0111833	0.778182	-0.0598287	0.200092	0.0449948	0.184551	0.0575904	0.0808938	-0.0365177	0.380101	-0.0321519	0.385734	-0.0485226	0.239676	0.00533367	0.904607	0.0361729	0.435667	-0.00479534	0.917315	-0.0248706	0.587489	-0.0107303	0.82048	0.0014126
rs830386	-0.00851397	0.536878	0.0052072	0.68504	-0.00252776	0.881138	-0.0216034	0.158912	-0.0243366	0.16153	-0.00721599	0.672256	-0.00962262	0.594049	-0.0262112	0.152128	-0.0450514	0.0112835	0.0195014	0.290412	0.0283923	0.117874	-0.0074444	0.688052	0.00405338	0.81272	-0.00275624	0.890148	-1.02351e-05	0.999451	0.00770365	0.583016	0.00530065	0.764557	-0.0111306	0.48088	-0.0219948	0.210687	-0.00286401	0.879517	-0.0102354	0.605084	-0.0151925	0.444286	-0.0344983	0.0782112	0.0276133	0.169976	0.0476907
rs889956	0.00472724	0.70385	-0.00598681	0.607267	-0.0099279	0.51824	0.00404622	0.771672	-0.0158705	0.315874	0.0113195	0.464772	-0.0220703	0.177249	-0.017321	0.295366	-0.0141591	0.377906	-0.00129639	0.938331	0.0186001	0.259583	0.00545011	0.746278	-0.00693663	0.655683	-0.00992507	0.584265	0.00130773	0.92229	-0.0102459	0.420293	-0.00333513	0.835544	0.00142499	0.920838	-0.00211244	0.894751	0.0078861	0.644866	-0.00753452	0.675093	-0.0150594	0.402744	-0.0146722	0.408098	-0.0051087	0.779365	0.013081
rs909674	-0.0218365	0.102938	-0.0260681	0.0369426	-0.00248575	0.879843	-0.00920953	0.537259	0.0026803	0.874381	0.00544563	0.743259	-0.0173597	0.321036	-0.0500325	0.00465909	-0.03503	0.042047	0.0169009	0.348076	0.0168091	0.343103	-0.000354516	0.984311	0.000913855	0.956322	0.0176623	0.362908	-0.0342904	0.0184524	-0.0327913	0.016983	0.00956706	0.580533	-0.00202145	0.89596	0.0246263	0.152941	-3.42684e-05	0.998523	-0.0367189	0.0576806	-0.0613818	0.00153227	-0.0452642	0.0180456	0.0168862	0.392604	0.00796721
rs9295486	-0.00753085	0.524202	-0.0298351	0.00721453	-0.00693069	0.636877	-0.00177667	0.893986	-0.033244	0.0277296	0.00274858	0.852658	-0.00974685	0.53044	-0.0206164	0.190544	-0.0309019	0.0429468	0.00464974	0.771735	0.00122815	0.937946	0.00140605	0.93021	-0.0120982	0.41748	-0.0120218	0.4875	-0.00542246	0.669876	-0.0359118	0.00306071	-0.00941711	0.539254	-0.00317932	0.816479	-0.0330704	0.0299786	-0.000431908	0.978937	0.00543422	0.750386	-0.0229201	0.180586	-0.02402	0.154374	0.00916038	0.599704	0.0125776
rs935116	-0.00555196	0.656257	-0.00266362	0.820246	-0.00174967	0.909807	-0.0174449	0.213283	0.0194786	0.22087	0.00453361	0.771664	-0.0238447	0.146358	-0.0132094	0.424806	-0.0204298	0.204796	-0.000766725	0.963981	0.0173379	0.299757	-0.0232911	0.170378	-0.015559	0.323026	-0.00997407	0.585258	0.00406423	0.762765	-0.00390325	0.760211	-0.00569389	0.724247	-0.0218719	0.12896	0.0177309	0.269542	0.0103969	0.54645	-0.0176063	0.328085	-0.0028668	0.87321	-0.022032	0.214968	0.00541541	0.768882	0.0299591
rs9384679	0.0327382	0.00733218	0.0233919	0.0417207	-0.00748417	0.620593	0.00549968	0.688802	-0.0184123	0.236585	0.0143484	0.347586	0.0145356	0.367307	0.0481912	0.00299916	0.0335095	0.0339225	0.0269557	0.101816	0.0218488	0.178141	-0.000891822	0.957164	-0.0306819	0.0458051	-0.0108218	0.544912	0.0265889	0.0444902	0.0299968	0.0172874	-0.0108863	0.49229	-0.00217677	0.877837	0.000196862	0.990031	0.00651613	0.70094	0.0171708	0.334625	0.032382	0.0681632	0.027777	0.113608	0.0268349	0.136051	0.0171725
rs9451649	0.0154095	0.206084	0.0257128	0.0242755	0.00148087	0.9218	-0.0173001	0.206356	-0.0226428	0.144743	0.0401447	0.00851286	-0.0238246	0.137442	-0.0199166	0.218323	-0.00844021	0.591721	0.00408072	0.804154	0.00630554	0.697113	0.0118254	0.474663	-0.0105889	0.489352	-0.00196816	0.912253	0.0115861	0.382412	0.0224696	0.0741893	0.0201958	0.204867	-0.0124655	0.380719	-0.0248946	0.11576	0.0291727	0.0865965	-0.0222451	0.211084	-0.0241884	0.172821	-0.00415601	0.812637	0.00351426	0.845912	0.00783454
rs9467777	0.00675058	0.62971	-0.000672128	0.959214	-0.0338535	0.0503287	-0.0146954	0.349338	-0.000124846	0.994404	0.0212479	0.223825	0.0211606	0.250028	0.00934483	0.615011	0.0268356	0.138785	-0.0200055	0.289811	-0.00427539	0.818291	0.00158443	0.933475	-0.00810035	0.645235	-0.025366	0.215579	0.00616732	0.684234	-3.63474e-05	0.997987	-0.033837	0.0626272	-0.0146958	0.365057	0.0236631	0.190277	0.0339342	0.0799782	0.0248304	0.221503	0.0088835	0.660977	0.0238094	0.235785	-0.0178448	0.38796	-0.00411033
rs9477970	-0.0130585	0.396685	-0.00719918	0.617216	-0.00375428	0.843841	0.00479526	0.781396	-0.0155032	0.428946	0.00996972	0.603423	-0.0103952	0.607103	0.01605	0.433218	0.0320062	0.106859	0.0181037	0.383546	0.0117336	0.566564	0.0315815	0.129877	-0.00218578	0.909874	-0.0279618	0.214364	-0.0170902	0.301927	-0.00380161	0.809091	0.00845553	0.669988	0.0151916	0.39041	-0.0184092	0.349877	0.00443726	0.834039	-0.0264779	0.233844	0.00573986	0.796663	0.0225482	0.305547	0.0106763	0.636674	-0.00442779
rs9489945	0.0135495	0.259948	0.00503623	0.65427	0.0152127	0.305747	-0.00631873	0.639336	0.000246367	0.98715	-0.000933213	0.950143	0.0144399	0.359221	0.00927288	0.558563	0.021251	0.169002	0.00619282	0.701214	0.0103592	0.514395	-0.00457254	0.777752	0.0050943	0.734219	-0.0021402	0.902497	0.00362188	0.78035	0.00230282	0.851888	0.0121118	0.43709	-0.00707653	0.611098	-0.00484292	0.754681	1.42396e-05	0.999315	0.0120531	0.488277	5.66075e-05	0.997389	0.0214893	0.209881	-0.00335675	0.848958	-0.00129073
rs9520384	0.00296848	0.814456	0.00405707	0.731588	-0.0126292	0.41825	0.0224619	0.112794	0.0166471	0.299787	0.0256514	0.102838	0.0221272	0.18217	-0.0003583	0.982943	-0.0124176	0.445878	0.00947744	0.576404	-0.0185305	0.267143	0.0216973	0.202455	0.0105324	0.505174	-0.0230603	0.209163	0.000181202	0.989515	0.00889749	0.494319	-0.0200333	0.223758	0.00445353	0.762066	0.0181215	0.268093	0.0165766	0.344327	0.028532	0.120812	0.00598685	0.744353	-0.0117275	0.518548	0.00894449	0.631898	-0.0238304
rs9541479	0.0213005	0.0762135	0.00218655	0.846282	-0.0129311	0.385152	-0.0072255	0.592975	-0.0343534	0.0250656	-0.0147374	0.326218	0.00393969	0.80307	0.0166394	0.298022	0.0191121	0.218824	0.012925	0.424696	0.0338422	0.0337318	0.00408757	0.802097	0.0150543	0.319375	0.0039664	0.821615	0.0288109	0.0268322	0.00753786	0.542053	-0.0163539	0.295254	0.00295598	0.832216	-0.0511524	0.000985364	-0.0193313	0.245603	-0.00448902	0.796773	0.0266598	0.126934	0.0241977	0.160657	0.0159681	0.366458	0.0419835
rs9597254	0.00410465	0.773809	-0.00471104	0.72724	0.00480618	0.787339	0.00400352	0.804511	0.00243376	0.894386	-0.003217	0.857787	0.0015951	0.932684	-0.0313583	0.0990331	-0.00198771	0.914507	0.00750524	0.698719	0.00534238	0.7795	-0.0177253	0.363495	-8.65608e-05	0.996165	0.0426916	0.0424401	-0.00693314	0.653065	-0.0078043	0.597806	0.0254631	0.172699	0.00850217	0.610381	0.0123418	0.505908	-0.00741427	0.709224	0.00555802	0.788942	-0.0183922	0.374836	-0.00705471	0.730412	-0.000147264	0.994452	-0.000642176
rs9916613	-0.0127896	0.292337	-0.00302354	0.792058	0.0103755	0.492187	-0.00701992	0.608733	0.0360892	0.0201596	-0.0105554	0.488594	-0.00416205	0.794543	0.0152615	0.34481	-0.00759691	0.628036	0.00300696	0.855285	0.00430125	0.790996	-0.0278854	0.0910884	-0.0268687	0.0779757	0.00210971	0.905512	-0.0159925	0.22321	-0.00671254	0.592237	0.023991	0.12865	-0.00777023	0.581692	0.0235875	0.132577	-0.0254684	0.131284	0.00404319	0.81828	0.0247828	0.159954	-0.00408877	0.813775	-0.00754743	0.673901	-0.0114582
rs9921412	0.00926934	0.480779	-0.0161764	0.184649	0.0116001	0.472611	0.0036654	0.80248	0.0112862	0.49728	0.013275	0.413204	-0.00672686	0.693601	0.0184088	0.287285	-0.00889608	0.596839	-0.0294554	0.0961063	0.0163897	0.347002	-0.00264224	0.880703	0.0198726	0.220502	0.0257683	0.174383	0.0122495	0.392512	-0.0209911	0.118771	0.00732634	0.667293	-0.000668662	0.964929	-0.00558201	0.74181	0.0119255	0.509625	0.0169194	0.371629	0.0253431	0.180742	-0.00510255	0.785502	-0.0281993	0.147317	0.0122525
rs9934041	-0.0148712	0.238568	0.00215773	0.856514	0.00300173	0.848623	0.00557069	0.696493	0.0176348	0.276036	-0.0284727	0.073045	-0.0334279	0.0452649	-0.02692	0.109864	-0.0161373	0.324884	0.00176051	0.917995	0.00724448	0.666863	-0.018543	0.282942	0.00158377	0.920891	0.018433	0.322239	-0.013103	0.338488	-0.00320478	0.807097	-0.000433703	0.979085	0.00724199	0.624122	0.00572325	0.727787	-0.0193245	0.273707	-0.0412915	0.0253723	-0.0150496	0.414285	-0.00503156	0.782376	0.0121131	0.517717	0.0110992
[truncated: 9 more columns]
