# Supplementary material for: Genetic variation underlying cognition and its relation with neurological outcomes and brain imaging
Source: Aging (Albany NY). 2019 Mar 4;11(5):1440–56. doi: 10.18632/aging.101844 (PMC6428100; doi:10.18632/aging.101844)
Supplement: Supplementary Table S5 [file aging-11-101844-s006.xlsx]

## Sheet: Sheet1
Supplementary Table S5. Association of polygenic risk scores and individual genetic variants with clinical outcomes, adjusted for age and sex.
Determinant	Beta.Dementia	P.Dementia	Beta.Parkinsonism	P.Parkinsonism	Beta.Parkinson disease	P.Parkinson disease	Beta.All stroke	P.All stroke
Polygenic score no threshold for the developmental component	0.00246534	0.925612	-0.00642745	0.920702	0.0555261	0.535469	0.0147964	0.61264
Polygenic score P>5e-8 for the developmental component	-0.000227849	0.993149	-0.0595278	0.356128	-0.00677558	0.939689	0.0152652	0.601935
Polygenic score P>1e-7 for the developmental component	0.00416291	0.875036	-0.0622483	0.333387	-0.00232558	0.979241	0.0139838	0.632506
Polygenic score P>1e-6 for the developmental component	0.00462258	0.86112	-0.0634242	0.323331	-0.0107775	0.903807	0.0130304	0.655515
Polygenic score P>1e-5 for the developmental component	-0.000256833	0.992225	-0.0278829	0.663328	0.0376948	0.67149	0.00752888	0.796079
Polygenic score P>1e-4 for the developmental component	0.00498948	0.84904	-0.00564778	0.929467	0.0615476	0.486943	0.0115453	0.691068
Polygenic score P>1e-3 for the developmental component	0.00373362	0.886781	0.00530518	0.933752	0.0473299	0.593181	0.00664059	0.818562
Polygenic score P>0.01 for the developmental component	0.0160235	0.542331	-0.00442286	0.945035	0.0732854	0.409651	-0.0340107	0.243581
Polygenic score P>0.05 for the developmental component	0.0546359	0.040237	-0.033366	0.606878	0.0396666	0.657906	-0.0426118	0.149496
Polygenic score for educational attainment	-0.0150831	0.564449	0.00654998	0.918956	0.0550244	0.538487	0.0182025	0.530283
rs10145335_G	-0.00723638	0.866789	-0.112112	0.273761	-0.234599	0.0903683	-0.0072547	0.878629
rs10514301_T	-0.00691119	0.903631	-0.189476	0.198235	-0.297517	0.162732	0.0285114	0.643923
rs10761765_G	0.0248927	0.605516	0.0974837	0.415921	-0.0381831	0.81125	-0.0504212	0.331427
rs10786662_G	-0.0562392	0.142388	-0.115639	0.220073	-0.190683	0.147686	-0.0173585	0.68194
rs10798879_C	0.00311775	0.935418	-0.070239	0.450511	-0.203101	0.11273	0.0161626	0.703528
rs10806984_A	-0.0115819	0.773024	0.0146	0.88103	0.0648625	0.634301	-0.0517542	0.239308
rs10875914_G	0.0208461	0.583947	-0.0399448	0.669327	-0.108163	0.408999	-0.0243063	0.563846
rs10996430_G	0.0260914	0.535639	0.0389737	0.70319	-0.0266762	0.853876	-0.0383734	0.416393
rs11126396_C	-0.0404638	0.312797	0.103375	0.303891	0.0838171	0.547113	0.0396665	0.375379
rs111342015_A	-0.0550902	0.390829	-0.0811617	0.608546	0.00123444	0.995367	-0.00017746	0.997952
rs111599092_A	0.0177852	0.797621	0.149124	0.355888	0.41817	0.0411114	-0.00154807	0.983823
rs11168951_T	0.0430654	0.553467	-0.397773	0.0536673	-0.967422	0.0067153	0.0727479	0.354805
rs112780312_G	-0.0116427	0.784939	-0.0763419	0.460577	-0.0732358	0.611661	0.00224102	0.962606
rs113714691_C	-0.0376085	0.549602	-0.0447363	0.769086	-0.0917162	0.659222	0.0827753	0.247577
rs11628208_C	-0.00135427	0.97182	0.0166198	0.858902	0.0964557	0.461119	0.000251404	0.995257
rs11662271_T	-0.0358351	0.347248	-0.0824081	0.376188	-0.0988871	0.444632	0.0836584	0.0451337
rs11678106_T	0.0537822	0.156635	0.0510893	0.580954	0.0832178	0.517817	0.0637209	0.127858
rs11720236_G	0.12954	0.00834114	-0.252358	0.0622317	-0.0936905	0.598509	0.0340022	0.540346
rs117431198_C	-0.0380839	0.737888	0.8723	0.0358916	0.594731	0.240678	0.0156702	0.902417
rs11759522_G	0.0597398	0.114872	-0.157303	0.0958861	-0.0876643	0.500926	-2.9919e-05	0.999433
rs117793008_A	-0.0467694	0.561638	-0.246204	0.175853	-0.364117	0.129629	0.0674486	0.465988
rs11793831_T	-0.0838565	0.0349364	-0.0638092	0.511351	0.00344564	0.979496	0.071143	0.100013
rs11884495_A	0.0501356	0.175984	0.0888813	0.326503	0.0779096	0.535735	0.080114	0.0510424
rs11896887_A	-0.000793255	0.983381	-0.0467417	0.61576	0.062785	0.625306	0.0198696	0.636079
rs11970030_G	-0.0715532	0.225526	-0.102219	0.465164	0.0398309	0.846201	-0.0427355	0.513446
rs12438326_A	0.0160393	0.680502	0.00525194	0.956105	0.103571	0.441614	-0.0187289	0.661507
rs12441495_G	0.0525166	0.377789	-0.0269734	0.849727	-0.155293	0.412902	0.0453944	0.493429
rs12485060_C	-0.0379273	0.314437	0.00810757	0.929878	0.153202	0.227228	-0.0299744	0.473044
rs12646225_T	-0.0401826	0.513126	0.16273	0.233444	0.216306	0.245366	-0.0162717	0.806653
rs12707116_C	-0.013692	0.716142	-0.128944	0.160774	-0.0982103	0.441137	-0.00381609	0.926586
rs12713315_C	-0.0024782	0.951383	0.196725	0.0395851	0.131809	0.32565	0.0176853	0.691331
rs12918191_A	-0.0441987	0.317714	-0.0931016	0.37875	-0.085961	0.559056	-0.00402293	0.934342
rs13062354_G	-0.0496232	0.177895	-0.0280188	0.756832	-0.0536837	0.668993	0.0167415	0.680756
rs13107325_C	0.0792927	0.384431	-0.0615199	0.767007	-0.0600347	0.835637	0.109963	0.280599
rs13146981_C	-0.0112096	0.766509	0.133387	0.150139	0.0332397	0.795493	0.039898	0.33964
rs1318878_C	-0.0237575	0.603909	-0.00446956	0.968151	-0.103771	0.49336	-0.0336148	0.504569
rs13262595_G	0.0295438	0.427622	0.159153	0.0827321	0.124011	0.328665	0.0451867	0.27208
rs13278931_G	-0.0059611	0.871444	0.0332751	0.713985	0.0790169	0.532219	0.0722338	0.078133
rs13425585_G	0.00700321	0.854895	0.0851874	0.361118	0.20799	0.108616	-0.024941	0.556207
rs13428598_T	-0.0282397	0.460755	0.096144	0.300876	-0.000699338	0.995724	0.0200604	0.635003
rs1343700_A	-0.0422044	0.279968	0.0904577	0.349432	0.0618409	0.643316	-0.0591188	0.166808
rs1343775_A	0.00747519	0.868583	-0.0934414	0.380883	-0.11188	0.446863	0.0230295	0.643907
rs1363119_G	0.0160691	0.673482	-0.154591	0.0947874	-0.145936	0.256177	-0.0113835	0.786315
rs1408579_T	-0.0061106	0.868032	0.015721	0.860961	0.0351034	0.778146	0.0563142	0.164043
rs1428472_A	-0.0671032	0.0954339	-0.0225442	0.818781	-0.0720976	0.593979	0.0941305	0.0383339
rs1473634_G	-0.00451382	0.910541	0.124662	0.196667	0.325298	0.0127573	0.0279128	0.530357
rs1541102_T	-0.0754291	0.05669	-0.0233318	0.805867	0.0415791	0.749974	0.0479197	0.261929
rs1699462_T	0.0201444	0.596433	-0.199135	0.0349107	-0.310003	0.0199553	-0.0557518	0.184535
rs1702877_T	-0.0289329	0.480016	0.0659577	0.501906	0.17893	0.182038	-0.0417599	0.355034
rs17032400_C	0.0213142	0.565441	-0.014034	0.876865	0.110114	0.379004	0.00738016	0.856954
rs17251689_C	0.0120282	0.807641	0.208356	0.0688773	0.310301	0.0459055	-0.039376	0.473347
rs17420654_C	-0.0330373	0.417304	-0.0509577	0.606044	0.0329535	0.812631	0.0692118	0.129387
rs17589603_A	0.00582273	0.924911	-0.274335	0.0463609	-0.373798	0.0441471	0.0210966	0.758367
rs17663165_A	-0.00736138	0.845771	0.0960585	0.293421	0.164506	0.193029	0.00592649	0.886706
rs1787003_A	0.0283724	0.451221	-0.212505	0.0244106	-0.234697	0.0746624	0.0581535	0.162329
rs179994_A	0.0954557	0.0136996	-0.0436372	0.638158	-0.050269	0.696255	0.00742742	0.860571
rs1892423_C	-0.0493524	0.183961	0.0894707	0.330194	0.140714	0.271997	0.0112829	0.784481
rs1895471_A	-0.0192555	0.632395	-0.0818957	0.396021	-0.167457	0.20589	-0.14321	0.001002
rs1953522_C	-0.0475125	0.221818	-0.0186588	0.844391	0.00498435	0.970008	0.000383285	0.992906
rs2007481_A	0.0502062	0.205312	-0.0871113	0.362258	-0.00417444	0.975284	-0.0271087	0.533521
rs2077610_A	0.0150785	0.688551	-0.0213369	0.815708	0.000868636	0.99455	0.0268056	0.518733
rs2239647_C	-0.0158281	0.675033	0.0919392	0.317847	-0.00557911	0.96498	0.109433	0.00876844
rs2284871_T	0.0281089	0.477259	0.019041	0.842263	0.0454376	0.731382	0.0427202	0.324955
rs2333604_C	-0.0401623	0.297198	0.0748951	0.430955	0.0327566	0.803102	0.01896	0.656449
rs2388334_G	0.0601258	0.107086	0.118454	0.191811	0.0946785	0.45295	0.0485256	0.237159
rs2420551_T	0.118866	0.0856386	-0.202351	0.28444	-0.0186372	0.939207	0.0033975	0.966083
rs2425161_G	-0.0177041	0.72068	-0.0564397	0.644199	-0.0145601	0.930799	0.0530528	0.320818
rs2426132_C	-0.0274477	0.474665	-0.00695564	0.940213	0.0594201	0.643481	-0.0217317	0.604603
rs2457192_C	0.00874403	0.840013	-0.0266766	0.801972	0.07105	0.625605	0.00300448	0.950064
rs2478295_C	-0.00565811	0.89256	0.0374725	0.711141	0.0317924	0.82129	0.0110407	0.810681
rs2726513_G	-0.0386088	0.313348	0.0552539	0.553291	0.0467631	0.717765	0.0410137	0.332021
rs2765042_G	-0.0309182	0.429583	-0.101281	0.285706	0.0329873	0.806132	0.0120737	0.780445
rs2819336_T	0.0118735	0.758895	0.159066	0.0882915	0.197419	0.126944	-0.0297494	0.489075
rs28549862_A	-0.0289931	0.488275	-0.108436	0.301966	-0.132347	0.367765	-0.0191631	0.680058
rs28612284_T	0.23066	0.180567	-0.329133	0.328384	-0.328699	0.483613	-0.0896304	0.595248
rs28657585_T	-0.0238066	0.671945	0.160074	0.212658	0.248325	0.152426	-0.0727373	0.246921
rs28892332_T	-0.0111572	0.911405	-0.324704	0.237178	-0.317023	0.40472	-0.130798	0.252008
rs2906455_C	0.0558946	0.36675	0.0540834	0.718729	0.185526	0.397527	0.102644	0.13679
rs3092073_G	-0.0249242	0.513679	-0.0475936	0.604488	0.160235	0.213844	-0.0439065	0.292666
rs34172651_C	-0.0343241	0.422664	-0.216655	0.0452388	-0.15837	0.284957	-0.056308	0.233843
rs34180096_C	-0.036092	0.352189	0.0338044	0.719454	0.0243723	0.852199	-0.0439665	0.304309
rs34305371_A	-0.0150853	0.832975	-0.0229171	0.896171	0.0125195	0.958543	-0.100254	0.217637
rs34627_A	-0.0505523	0.182421	-0.137217	0.135332	-0.220899	0.0844028	0.0364865	0.377533
rs34811474_A	0.0107624	0.86348	0.0144297	0.924103	0.0382787	0.854792	0.0400369	0.55896
rs35891966_G	0.0904337	0.413829	-0.396086	0.0873358	-0.690622	0.0180308	-0.219752	0.0462753
rs36004779_A	-0.0304035	0.544702	0.0547034	0.660558	0.0471329	0.784777	-0.0142737	0.794605
rs36162392_C	0.0734773	0.222591	0.0672625	0.648448	0.184413	0.347029	0.080036	0.225204
rs3817334_C	0.0913613	0.0180576	0.00620504	0.947094	0.152354	0.249318	-0.0453587	0.27989
rs3850610_A	-0.0306073	0.461162	-0.124049	0.231342	-0.0271664	0.846473	-0.000236723	0.995855
rs3914453_A	-0.0224781	0.557509	0.0725716	0.436356	0.0358134	0.78263	-0.0158761	0.707563
rs39302_C	-0.034171	0.473039	0.033683	0.776398	0.147825	0.38569	-0.0453536	0.387944
rs407102_C	-0.0316002	0.47222	0.11357	0.279967	0.0701015	0.63383	0.027014	0.575882
rs421211_A	-0.088686	0.0163249	-0.0259085	0.77559	-0.0236705	0.851374	-0.00141873	0.972533
rs424029_G	-0.0953356	0.330274	0.0858116	0.737714	-0.00382834	0.991055	-0.105246	0.323823
rs4294650_T	-0.0337477	0.41013	0.0627088	0.523088	0.0945355	0.485513	-0.0755644	0.0981522
rs4636654_A	-0.0519049	0.173769	-0.031784	0.732237	-0.0463282	0.72022	-0.00829962	0.843629
rs4690029_T	-0.0461199	0.223178	-0.0746767	0.418022	-0.016185	0.899565	-0.0309748	0.457361
rs4720476_C	0.0324164	0.438659	0.202344	0.0442978	0.000576494	0.996722	-0.0532848	0.247781
rs4781499_A	-0.0195181	0.714567	-0.255289	0.0324946	-0.392641	0.0133215	0.0156545	0.791164
rs4852252_C	-0.0132902	0.731013	0.272472	0.0047966	0.325951	0.0157685	-0.0784287	0.0644103
rs4925114_G	0.00608772	0.876793	0.026348	0.782403	0.153027	0.257305	-0.0101043	0.813285
rs516902_C	-0.0426303	0.264879	0.00530561	0.954431	-0.00369451	0.97718	-0.0344159	0.416252
rs527825_G	0.00159531	0.966398	-0.0381992	0.678041	-0.00504133	0.968615	0.0226511	0.588363
rs55985762_A	0.0638596	0.161493	0.00233626	0.983428	0.0983508	0.517247	0.0668561	0.184247
rs56150095_C	0.0935091	0.0135852	0.0560536	0.542368	0.0638638	0.616433	-0.0329367	0.430127
rs56151722_G	0.116702	0.0118854	0.182743	0.111656	0.16666	0.294413	-0.035127	0.480252
rs5758605_G	-0.0131595	0.733855	-0.0305517	0.746345	-0.0907044	0.488436	0.031162	0.465773
rs59663815_G	-0.0562024	0.193051	0.00684328	0.947681	0.0290527	0.840488	0.00777251	0.869318
rs61104616_G	0.0384524	0.302423	2.0338e-05	0.999822	-0.0168057	0.894231	-0.00222801	0.956837
rs6124077_G	0.0133918	0.741298	0.0293804	0.767714	0.0169683	0.902249	-0.00115069	0.97951
rs61544985_G	0.0217682	0.565525	-0.0816451	0.373927	-0.0739278	0.562192	0.0577401	0.16853
rs62037363_T	0.039861	0.317176	0.0843095	0.385178	0.171737	0.207135	-0.026808	0.53765
rs62047280_A	0.0307467	0.518793	-0.116884	0.333542	-0.184732	0.281052	-0.0494709	0.356352
rs62236533_A	0.0640464	0.357873	0.0626884	0.710007	-0.00804127	0.973203	0.115257	0.123837
rs62253086_T	0.046982	0.50228	-0.0415257	0.798784	-0.245908	0.241038	-0.0351601	0.638834
rs62358087_A	0.0125179	0.793775	0.146743	0.229218	-0.0177585	0.91233	0.0427384	0.423968
rs62439690_G	-0.00346826	0.935662	0.0286035	0.787598	0.12194	0.419073	-0.0164957	0.72827
rs66886492_T	0.0731121	0.222678	0.0437312	0.767075	0.185682	0.338672	0.0496844	0.455296
rs6760964_C	-0.013663	0.717463	0.123169	0.192685	0.0647055	0.619988	0.0134541	0.748632
rs6778735_C	0.0456122	0.227721	0.0182485	0.8427	0.0863253	0.500993	-0.00975863	0.814335
rs6819372_G	-0.0492237	0.187886	0.0404945	0.654951	0.0478255	0.703606	0.046536	0.257357
rs7010173_T	-0.0246877	0.518344	-0.0203317	0.828635	0.0946306	0.473098	-0.0350139	0.40829
rs7038525_C	-0.0961618	0.0401735	-0.141966	0.204182	0.00199831	0.990145	-0.135997	0.00733532
rs704444_G	0.0137407	0.719413	-0.0355505	0.702639	0.112916	0.379939	-0.0467119	0.266881
rs71413877_A	-0.135085	0.245834	-0.0971285	0.734837	0.130392	0.72153	-0.166352	0.207252
rs7186834_T	0.0420975	0.273153	0.106984	0.256432	0.112551	0.389906	0.0385857	0.359317
rs72801843_A	0.00610302	0.889065	0.120445	0.24862	0.123541	0.393895	-0.0412878	0.392543
rs73189617_G	0.0166583	0.69253	0.0472751	0.643095	0.188662	0.17221	0.00833658	0.857428
rs7365380_T	-0.0187897	0.620342	-0.0705199	0.441305	-0.167555	0.188029	0.0517567	0.214725
rs743134_G	0.0356891	0.34731	-0.0760234	0.405896	-0.103558	0.414181	0.0269206	0.518992
rs74370218_C	-0.025255	0.522329	0.0994603	0.305021	0.125535	0.351881	-0.0640571	0.136812
rs74796574_C	0.15916	0.108429	0.11608	0.629751	0.301114	0.331414	0.172439	0.108854
rs7487854_T	0.0836567	0.268403	-0.379917	0.0893184	-0.705377	0.0500834	0.0169781	0.843434
rs74944275_T	-0.00235635	0.982216	0.297448	0.196645	0.134918	0.692079	0.259667	0.0131236
rs750472_C	0.0247481	0.524975	0.062832	0.505025	-0.0334415	0.798414	0.042815	0.315028
rs7534501_G	-0.0276404	0.466299	-0.0667039	0.468435	-0.0986143	0.4403	0.013453	0.746295
rs7583067_T	-0.0962398	0.0437751	-0.0998688	0.390664	0.0021965	0.988854	-0.0501014	0.332615
rs7590388_G	-0.0158487	0.674074	0.0093579	0.918768	-0.0680365	0.592735	0.0556295	0.180846
rs7599488_C	-0.0488816	0.192833	-0.055279	0.544719	-0.157917	0.210747	-0.0460495	0.26558
rs7609050_C	0.0574452	0.124027	-0.195222	0.0325333	-0.145148	0.25209	0.0455174	0.270104
rs7618519_T	0.00686983	0.854666	0.0714366	0.43283	0.0963351	0.446464	-0.085576	0.0383956
rs7633520_G	-0.0267034	0.520305	0.064351	0.535092	0.0840622	0.561025	-0.0629439	0.168318
rs7699872_T	-0.00242326	0.952007	0.0188735	0.848309	0.143507	0.301574	-0.0634375	0.151095
rs77482156_C	0.116762	0.139405	0.102123	0.59685	0.0158709	0.954538	0.0838879	0.338303
rs7763264_C	-0.0139207	0.719445	0.154278	0.106796	0.245306	0.0682517	-0.040689	0.335454
rs78066960_A	-0.0377542	0.372694	0.00371685	0.970753	0.219317	0.102789	0.0258384	0.570951
rs7814022_A	-0.0626304	0.0955581	-0.00344946	0.969928	-0.0838474	0.50698	-0.0255511	0.535625
rs7873907_T	-0.0366978	0.325685	0.0688472	0.447338	0.213845	0.0905453	0.00389455	0.924816
rs79245415_G	-0.0193569	0.796255	0.142757	0.414311	0.219399	0.356507	0.0236166	0.771425
rs79582714_T	0.0565427	0.346647	0.0587726	0.685092	0.017184	0.932957	-0.00776608	0.908042
rs7963801_T	0.0593389	0.130627	-0.0948083	0.325704	-0.268014	0.0500645	0.00950338	0.826102
rs7978070_T	0.0489007	0.197742	0.14916	0.108686	0.161774	0.210227	-0.0122119	0.769581
rs7998050_G	0.012621	0.759239	-0.0745665	0.449561	0.0161257	0.907674	0.0108687	0.810101
rs80170948_T	0.130553	0.209216	0.343475	0.218805	0.261312	0.487105	-0.0755096	0.47477
rs830386_A	0.0358951	0.409809	0.0430915	0.683078	-0.0183936	0.901606	0.0500528	0.294135
rs889956_G	0.0215233	0.586887	-0.108123	0.253041	-0.185279	0.156172	0.0736404	0.0919421
rs909674_A	0.00751849	0.860879	-0.0948139	0.351887	-0.247247	0.0715019	-0.023607	0.614285
rs9295486_C	-0.00372665	0.921057	-0.113241	0.218406	-0.0522843	0.681302	-0.0493581	0.232819
rs935116_G	0.0603066	0.118261	0.0327836	0.729102	0.0185932	0.887847	0.0483531	0.256424
rs9384679_C	0.0245096	0.526872	0.0836785	0.383704	0.15199	0.259913	0.00996279	0.816889
rs9451649_T	0.0065288	0.865347	-0.00727295	0.93808	-0.0917595	0.476738	-0.0489301	0.246919
rs9467777_C	0.0316714	0.478875	-0.0395066	0.714334	-0.0121468	0.935489	0.0195476	0.690739
rs9477970_A	-0.069171	0.157418	-0.0763119	0.528209	-0.208544	0.235361	0.0321965	0.541601
rs9489945_G	-0.00495685	0.89559	-0.113092	0.212967	-0.23756	0.0579831	-0.00193818	0.962867
rs9520384_G	-0.0326079	0.41578	-0.15948	0.0941132	-0.0829996	0.535558	0.00278355	0.949972
rs9541479_C	0.0550421	0.150936	0.0321837	0.731075	0.101493	0.43637	-0.13205	0.00171
rs9597254_T	0.126642	0.00466821	-0.0347866	0.755625	-0.269506	0.096073	-0.0384384	0.447948
rs9916613_A	-0.0431815	0.266279	0.0298203	0.75192	0.0318637	0.807805	0.0257622	0.544771
rs9921412_T	0.0507364	0.220069	-0.0353927	0.722972	-0.190582	0.158105	0.045956	0.31677
rs9934041_C	0.0420691	0.295037	0.0838293	0.398876	0.11325	0.414287	-0.0139182	0.75321
