# Supplementary material for: Genetic variation underlying cognition and its relation with neurological outcomes and brain imaging
Source: Aging (Albany NY). 2019 Mar 4;11(5):1440–56. doi: 10.18632/aging.101844 (PMC6428100; doi:10.18632/aging.101844)
Supplement: Supplementary Table S6 [file aging-11-101844-s007.xlsx]

## Sheet: Sheet1
Supplementary Table S6. Association of polygenic risk scores and individual genetic variants with volumetric brain imaging markers and global white matter microstructural integrity.
	Model 1 (adjusted for age and sex, and additionally for white matter and white matter lesion volume in the global white matter microstructural integrity analyses)												Model 2: adjusted for age, sex and intracranial volume if the outcome is not intracranial volume, and additionally for white matter and white matter lesion volume in the global white matter microstructural integrity analyses.
Determinant	Beta.Intracranial volume	p.Intracranial volume	Beta.Brain volume	p.Brain volume	Beta.Grey matter volume	p.Grey matter volume	Beta.White matter volume	p.White matter volume	Beta.Global fractional anisotropy	p.Global fractional anisotropy	Beta.Global mean diffusivity	p.Global mean diffusivity	Beta.Intracranial volume	p.Intracranial volume	Beta.Brain volume	p.Brain volume	Beta.Grey matter volume	p.Grey matter volume	Beta.White matter volume	p.White matter volume	Beta.Global fractional anisotropy	p.Global fractional anisotropy	Beta.Global mean diffusivity	p.Global mean diffusivity
Polygenic score no threshold for the developmental component	0.0450027	0.000752294	0.048152	0.000179351	0.055345	4.50501e-05	0.0300869	0.0308317	0.0257057	0.0768581	-0.00818951	0.460795	0.0450027	0.000752294	0.00853565	0.100308	0.0211122	0.0189038	-0.00478898	0.608427	0.0176248	0.217016	-0.0147397	0.175777
Polygenic score p>5e-8 for the developmental component	0.0353993	0.0081977	0.0406544	0.00160512	0.0506132	0.000197772	0.0219217	0.116554	0.0192977	0.184856	-0.00243432	0.826746	0.0353993	0.0081977	0.00948933	0.0681624	0.0236794	0.0085733	-0.00551068	0.556181	0.0127757	0.371455	-0.00769393	0.480307
Polygenic score p>1e-7 for the developmental component	0.038165	0.00450355	0.0429076	0.000905494	0.0507329	0.000201193	0.0255419	0.0684165	0.0240341	0.0996847	-0.00567736	0.610825	0.038165	0.00450355	0.00930862	0.0746471	0.0216939	0.016431	-0.00403126	0.667964	0.0175485	0.220983	-0.0109177	0.318043
Polygenic score p>1e-6 for the developmental component	0.0373898	0.00550977	0.0412283	0.00147239	0.0528667	0.000111464	0.0208527	0.137873	0.0288057	0.0490712	-0.00504754	0.65185	0.0373898	0.00550977	0.00830921	0.11248	0.024422	0.00705239	-0.00812809	0.388296	0.021552	0.133924	-0.0109191	0.319402
Polygenic score p>1e-5 for the developmental component	0.034521	0.010272	0.0388815	0.00266793	0.0507678	0.000202084	0.0188503	0.179148	0.0324478	0.0263375	-0.00579037	0.604048	0.034521	0.010272	0.00848738	0.104372	0.0245023	0.00677006	-0.00790528	0.400615	0.0257029	0.0732562	-0.0112528	0.303853
Polygenic score p>1e-4 for the developmental component	0.0311577	0.0214087	0.0348678	0.00747076	0.0470835	0.00061931	0.0155105	0.272253	0.0292866	0.04655	-0.00536271	0.633462	0.0311577	0.0214087	0.00743194	0.15775	0.023371	0.0102921	-0.00863802	0.361548	0.0226286	0.117418	-0.0107488	0.329473
Polygenic score p>1e-3 for the developmental component	0.0316659	0.0189532	0.0348318	0.00732483	0.035518	0.00958749	0.0258097	0.0667176	0.0271102	0.0649056	-0.00026562	0.981121	0.0316659	0.0189532	0.00694797	0.185087	0.0114018	0.209223	0.00128177	0.891936	0.0225607	0.117671	-0.00393156	0.720722
Polygenic score p>0.01 for the developmental component	0.0237816	0.0759963	0.0289627	0.0247496	0.0211849	0.119823	0.0289381	0.0384065	0.0179591	0.217867	-0.00114774	0.917922	0.0237816	0.0759963	0.00802056	0.123264	0.00306317	0.733996	0.0105248	0.261074	0.0163064	0.254292	-0.00247522	0.820502
Polygenic score p>0.05 for the developmental component	0.019377	0.14828	0.0237579	0.0655408	0.020274	0.136598	0.0211438	0.130387	0.00930988	0.523337	0.00142408	0.898339	0.019377	0.14828	0.00669269	0.198391	0.00550957	0.541006	0.00613692	0.512239	0.00735867	0.607262	-0.000142228	0.989606
Polygenic score for educational attainment	0.0404976	0.00242527	0.0392731	0.0022492	0.0490833	0.000296794	0.0210069	0.131654	0.0179135	0.217109	-0.00997904	0.36823	0.0404976	0.00242527	0.00360808	0.487132	0.0182647	0.0421981	-0.0103902	0.266087	0.00956171	0.502581	-0.01674	0.12371
rs10145335	0.026126	0.224051	0.0225091	0.276501	0.000812534	0.970318	0.0365087	0.10326	-0.0273683	0.240912	0.0249765	0.161304	0.026126	0.224051	-0.000505252	0.951704	-0.0191061	0.185971	0.0162768	0.278175	-0.0278663	0.223711	0.0245771	0.159353
rs10514301	-0.0192079	0.502532	-0.00666906	0.808897	-0.0166582	0.567134	0.00388756	0.896471	-0.00492106	0.874233	-0.0175748	0.459398	-0.0192079	0.502532	0.0102522	0.35647	-0.00201974	0.916467	0.0187692	0.348155	0.00189072	0.950597	-0.0121144	0.602658
rs10761765	-0.005023	0.834633	-0.0105388	0.64908	-0.0354012	0.147565	0.0142733	0.569473	-0.0170632	0.513186	-0.00725843	0.715841	-0.005023	0.834633	-0.00611415	0.512616	-0.0315734	0.0508466	0.0181646	0.279646	-0.0117268	0.647067	-0.00297497	0.878943
rs10786662	-0.0100802	0.597	-0.0132833	0.469173	-0.012731	0.51107	-0.0105717	0.594941	0.0117875	0.568926	0.00681457	0.66648	-0.0100802	0.597	-0.00440406	0.551724	-0.00504908	0.693593	-0.00276331	0.835594	0.0119801	0.555238	0.00696907	0.652701
rs10798879	-0.00274607	0.887818	-0.00679787	0.716764	0.00329591	0.867664	-0.0141977	0.484329	0.0423125	0.045201	0.000300532	0.985151	-0.00274607	0.887818	-0.00437891	0.562175	0.00538876	0.680452	-0.0120705	0.374573	0.0392157	0.0585948	-0.00218945	0.889902
rs10806984	-0.0124709	0.533841	0.00309938	0.872384	0.0127531	0.531224	-0.0062952	0.763314	0.0145299	0.504965	-0.0154326	0.354045	-0.0124709	0.533841	0.0140864	0.070144	0.0222597	0.0984676	0.00336571	0.810005	0.0165648	0.438648	-0.0138017	0.39744
rs10875914	-0.00617333	0.746129	-0.00015143	0.993417	0.0212202	0.273393	-0.0192567	0.332849	0.0356652	0.0860164	-0.0273804	0.0845425	-0.00617333	0.746129	0.00528674	0.474986	0.0259257	0.0430415	-0.0144749	0.277008	0.0336739	0.0986108	-0.0289819	0.0623003
rs10996430	-0.0110931	0.606754	-0.0136547	0.510403	-0.0211668	0.333747	-0.00363048	0.871683	0.0181036	0.439048	0.00755612	0.672534	-0.0110931	0.606754	-0.00388319	0.642479	-0.0127135	0.380148	0.00496307	0.741598	0.0199727	0.384364	0.00905542	0.605038
rs11126396	-0.0238874	0.251815	-0.0264438	0.187521	0.00168185	0.936717	-0.0452521	0.0373422	0.00641682	0.776771	0.0148426	0.390702	-0.0238874	0.251815	-0.00540352	0.504282	0.0198939	0.155698	-0.0267572	0.0660608	0.00335454	0.879957	0.012387	0.464583
rs111342015	-0.0231659	0.479063	-0.0388407	0.217589	-0.0681187	0.0404818	-0.00324239	0.924323	0.0535245	0.131354	-0.0179948	0.506836	-0.0231659	0.479063	-0.0184366	0.146638	-0.0504703	0.0217441	0.014705	0.520017	0.0597279	0.0862555	-0.0130313	0.623625
rs111599092	0.0463106	0.175384	0.0536695	0.102767	0.0338203	0.330122	0.0584932	0.100741	0.0367001	0.322666	-0.0119882	0.67246	0.0463106	0.175384	0.0128813	0.331602	-0.00147459	0.948835	0.0226301	0.343173	0.0352285	0.333371	-0.0131694	0.635369
rs11168951	-0.00413367	0.912069	0.00702872	0.845338	-0.0124832	0.742764	0.0228082	0.559045	0.0777275	0.0557696	-0.0235812	0.447657	-0.00413367	0.912069	0.0106701	0.462653	-0.00933285	0.710687	0.0260105	0.319707	0.0828582	0.0377307	-0.0194748	0.522027
rs112780312	0.0227202	0.298584	0.0253623	0.228012	0.0120214	0.588342	0.0311894	0.171211	-0.00147471	0.950436	0.00252637	0.889163	0.0227202	0.298584	0.00534979	0.528346	-0.00529562	0.718564	0.0135932	0.373261	-0.000527146	0.981937	0.00328667	0.853142
rs113714691	-0.0570654	0.0760474	-0.0695693	0.0246269	-0.0342258	0.295091	-0.0844329	0.0118196	-0.0427773	0.220711	-0.00360819	0.892474	-0.0570654	0.0760474	-0.0193173	0.121942	0.00927263	0.668203	-0.0402616	0.0731987	-0.0418979	0.221622	-0.00290249	0.911601
rs11628208	-0.0347702	0.0721895	-0.0336759	0.0704438	-0.0113182	0.564713	-0.0455724	0.0238311	0.00915896	0.66355	0.00495133	0.758254	-0.0347702	0.0721895	-0.00304987	0.684679	0.015194	0.242719	-0.0186541	0.167434	0.00878877	0.670577	0.0046543	0.767698
rs11662271	0.00946552	0.624174	0.0232687	0.210809	0.0229749	0.241829	0.0179153	0.373895	0.0378468	0.0711347	-0.0292767	0.0677027	0.00946552	0.624174	0.0149316	0.0463882	0.0157621	0.224801	0.0105836	0.432784	0.0384231	0.0619169	-0.0288147	0.0663706
rs11678106	-0.0187741	0.33489	-0.0054822	0.76989	-0.0160367	0.417578	0.00529438	0.794294	-0.0305242	0.149303	0.000353631	0.982559	-0.0187741	0.33489	0.0110585	0.143334	-0.0017291	0.894899	0.0198427	0.144465	-0.0238185	0.251762	0.00575235	0.716656
rs11720236	0.0202321	0.426332	0.0160533	0.51201	0.0236156	0.360822	0.00540511	0.838535	0.0282037	0.306608	-0.0163034	0.439269	0.0202321	0.426332	-0.00176932	0.857762	0.00819773	0.6316	-0.0102694	0.563187	0.0240848	0.373712	-0.0196145	0.342119
rs117431198	-0.00578215	0.918453	0.0151759	0.780119	0.0477706	0.405137	-0.017681	0.764028	-0.0592204	0.331503	0.0804506	0.0842112	-0.00578215	0.918453	0.0202694	0.355061	0.0521774	0.169226	-0.0132019	0.737824	-0.0638493	0.286036	0.0767422	0.0926264
rs11759522	0.0260914	0.183963	0.0276347	0.143744	0.0154862	0.437727	0.0318453	0.119942	-0.00135726	0.949322	0.00333039	0.838269	0.0260914	0.183963	0.00465322	0.541632	-0.00440058	0.738926	0.0116392	0.396184	-0.0015347	0.941621	0.00318803	0.841882
rs117793008	0.0172215	0.676508	0.0131198	0.741236	0.0126487	0.762969	0.010375	0.80954	-0.00256475	0.954306	0.00412924	0.9039	0.0172215	0.676508	-0.00205052	0.898149	-0.000476146	0.986307	-0.00296568	0.918056	-0.00418509	0.924096	0.00282926	0.932688
rs11793831	0.0280418	0.159029	0.0359167	0.0609066	0.0266697	0.187447	0.0355295	0.0870613	0.00106934	0.960581	-0.0175308	0.28891	0.0280418	0.159029	0.0112209	0.146588	0.00530139	0.692132	0.0138144	0.320635	0.00140096	0.947393	-0.0172648	0.286262
rs11884495	0.0110128	0.562348	0.0108802	0.552087	-0.00207103	0.914613	0.0198539	0.316562	-0.0480559	0.0198809	0.030513	0.0530159	0.0110128	0.562348	0.0011792	0.873014	-0.010465	0.412756	0.0113239	0.393645	-0.0471852	0.019818	0.0312126	0.0433058
rs11896887	0.0292597	0.131189	0.0302014	0.105529	0.0403267	0.0405977	0.0138427	0.493565	0.0152547	0.469032	0.00281295	0.861291	0.0292597	0.131189	0.00442954	0.556181	0.0180385	0.166365	-0.00882866	0.514471	0.00853495	0.679878	-0.00258554	0.869797
rs11970030	-0.050947	0.102209	-0.0442023	0.140761	-0.0337328	0.286975	-0.0429102	0.186923	-0.0180394	0.593901	0.00971216	0.70715	-0.050947	0.102209	0.000676894	0.955409	0.00509851	0.807861	-0.00344677	0.874272	-0.0116558	0.725589	0.0148403	0.557849
rs12438326	0.0190909	0.330074	0.000596006	0.974802	-0.023294	0.242169	0.0218495	0.285131	-0.00644425	0.762174	0.0153478	0.345518	0.0190909	0.330074	-0.0162251	0.0329172	-0.0378531	0.00405106	0.00706265	0.605949	-0.0067336	0.747288	0.0151156	0.342843
rs12441495	-0.0473467	0.113598	-0.0534852	0.063315	-0.0403789	0.184208	-0.052314	0.0936704	0.0552409	0.0901327	-0.00970382	0.696881	-0.0473467	0.113598	-0.0117859	0.310397	-0.00429804	0.830874	-0.0156476	0.454202	0.0577643	0.0709571	-0.00768167	0.752891
rs12485060	0.00252051	0.89651	0.0026795	0.885775	0.00275884	0.888571	0.00196168	0.922672	-0.0317915	0.130226	0.023752	0.138984	0.00252051	0.89651	0.000459205	0.951312	0.000837914	0.948706	9.16843e-06	0.999459	-0.0319357	0.121396	0.0236362	0.132761
rs12646225	0.0218742	0.489317	0.00841965	0.78219	-0.00386802	0.904232	0.017393	0.598101	0.00310165	0.92807	0.0042655	0.870931	0.0218742	0.489317	-0.0108505	0.376886	-0.0205414	0.334083	0.000448288	0.983814	0.000652489	0.984561	0.00230054	0.92871
rs12707116	-0.00236019	0.900272	0.00867297	0.632353	0.00579191	0.762152	0.00915999	0.640954	0.0305626	0.134914	-0.0194706	0.212612	-0.00236019	0.900272	0.0107521	0.141233	0.00759069	0.548747	0.0109883	0.403438	0.0314261	0.117248	-0.0187784	0.219696
rs12713315	0.025376	0.215268	0.0363618	0.0650427	0.036311	0.080939	0.0276306	0.195728	0.0399617	0.0720343	-0.0277028	0.102677	0.025376	0.215268	0.0140142	0.0778675	0.0169785	0.217469	0.0079765	0.577107	0.0393577	0.0710219	-0.0281877	0.0899856
rs12918191	0.0542638	0.0173183	0.0576209	0.00864995	0.0296113	0.201342	0.0687999	0.00380604	-0.0198546	0.422611	0.0277299	0.142676	0.0542638	0.0173183	0.00983548	0.266878	-0.011762	0.443309	0.0268056	0.0926029	-0.022603	0.352267	0.0255287	0.168266
rs13062354	-0.0128654	0.499435	-0.0156912	0.392127	-0.0251708	0.193423	-0.00341321	0.863592	-0.0511719	0.0132578	0.0300096	0.0573541	-0.0128654	0.499435	-0.00435877	0.555499	-0.0153678	0.230042	0.00655372	0.622286	-0.0488555	0.0159805	0.0318748	0.0392914
rs13107325	-0.0936638	0.0476078	-0.122144	0.0072705	-0.0186211	0.698412	-0.185383	0.000168625	0.0572312	0.26804	0.0040598	0.918108	-0.0936638	0.0476078	-0.0396784	0.0306856	0.0528177	0.0967457	-0.112946	0.000625297	0.0417094	0.410957	-0.00842173	0.827668
rs13146981	-0.007516	0.694058	-0.0130817	0.476915	0.00897738	0.643804	-0.0296816	0.1363	0.0351707	0.0895905	-0.0125873	0.426618	-0.007516	0.694058	-0.00646117	0.383587	0.0147061	0.252159	-0.0238603	0.0737012	0.0303225	0.135971	-0.0164937	0.287595
rs1318878	0.00463605	0.844339	0.00819545	0.718404	0.00410953	0.863998	0.00987688	0.688344	-0.0152911	0.551113	0.0175033	0.371845	0.00463605	0.844339	0.00411164	0.653655	0.000576322	0.971032	0.00628565	0.703055	-0.0157119	0.532546	0.0171657	0.371219
rs13262595	0.0283092	0.13803	0.0191604	0.297042	0.0166593	0.390407	0.0167758	0.399412	-0.0123853	0.549482	0.0305699	0.0531266	0.0283092	0.13803	-0.00578033	0.435392	-0.0049186	0.701558	-0.00515693	0.698968	-0.0183347	0.366728	0.0258212	0.0954798
rs13278931	0.00430959	0.817627	0.00654474	0.715997	0.0214006	0.259729	-0.00834082	0.668691	0.00407266	0.841006	-0.0102556	0.508519	0.00430959	0.817627	0.0027485	0.704734	0.0181164	0.149196	-0.0116794	0.37083	0.00154462	0.938207	-0.0122855	0.418744
rs13425585	0.0140499	0.46464	0.0149934	0.417549	0.014678	0.452168	0.0116569	0.560755	-0.0162159	0.437109	-0.000411549	0.979409	0.0140499	0.46464	0.00261738	0.725618	0.00397091	0.758509	0.0007733	0.954048	-0.0175979	0.390171	-0.0015199	0.922474
rs13428598	0.00967599	0.619756	0.00378452	0.840216	-0.00277191	0.888747	0.00874338	0.66725	0.019654	0.353856	-0.0225821	0.163242	0.00967599	0.619756	-0.00473928	0.531183	-0.0101468	0.438852	0.001248	0.926986	0.0196656	0.344511	-0.0225728	0.154748
rs1343700	0.0471036	0.017354	0.0478434	0.0120542	0.0205393	0.307427	0.0607505	0.00325276	-0.0471409	0.0283601	0.0244472	0.136844	0.0471036	0.017354	0.00636006	0.40835	-0.0153826	0.248216	0.024299	0.0791257	-0.0477101	0.023766	0.0239908	0.136084
rs1343775	0.0349874	0.12184	0.0312112	0.151646	0.0165642	0.471071	0.0367965	0.118721	-0.0266666	0.277296	0.0107347	0.567099	0.0349874	0.12184	0.000391404	0.964447	-0.0101069	0.506309	0.00969986	0.539282	-0.029182	0.225729	0.00871904	0.635069
rs1363119	0.0433173	0.0260794	0.048547	0.00957219	0.0228521	0.248124	0.0598429	0.00319657	-0.00973788	0.645953	0.00784834	0.627986	0.0433173	0.0260794	0.010403	0.168931	-0.0101744	0.437292	0.0263224	0.0530347	-0.00859121	0.679619	0.00876868	0.580433
rs1408579	0.0251128	0.185919	0.0201353	0.270563	0.00109638	0.954684	0.0323276	0.102506	-0.0121945	0.554349	0.0106727	0.498253	0.0251128	0.185919	-0.00198727	0.787457	-0.018051	0.157293	0.0128801	0.331456	-0.0117275	0.562314	0.0110474	0.474151
rs1428472	-0.0138479	0.49363	-0.0211987	0.27628	-0.0194293	0.344534	-0.0176666	0.402364	-0.0110011	0.616708	0.0139495	0.406176	-0.0138479	0.49363	-0.00900131	0.251587	-0.00887667	0.513894	-0.00694027	0.623263	-0.0116218	0.590025	0.0134516	0.413464
rs1473634	0.0182079	0.375295	0.0190749	0.334576	-0.00269334	0.89731	0.0339677	0.112707	-0.0141905	0.525948	-0.00142125	0.93375	0.0182079	0.375295	0.00303639	0.703275	-0.0165734	0.229921	0.0198672	0.165985	-0.0111786	0.610726	0.000996601	0.952546
rs1541102	0.00364085	0.854219	-0.00114895	0.951967	0.00966779	0.631114	-0.0105598	0.609356	-0.0146142	0.496639	0.009267	0.57266	0.00364085	0.854219	-0.00435619	0.571088	0.0068931	0.604777	-0.0133803	0.333561	-0.0185288	0.379866	0.00613139	0.703172
rs1699462	0.0202077	0.294171	0.0122491	0.508893	0.011182	0.567838	0.0102482	0.609989	-0.000750173	0.97145	0.00771292	0.630103	0.0202077	0.294171	-0.00555336	0.457684	-0.00421994	0.744542	-0.00540721	0.687789	-0.0046163	0.822457	0.00461313	0.768723
rs1702877	0.02765	0.183216	0.025538	0.201587	0.0193226	0.360047	0.0249407	0.249694	-0.0119444	0.596936	-0.00556643	0.747056	0.02765	0.183216	0.00118199	0.883492	-0.00175078	0.90026	0.00352346	0.808182	-0.0163781	0.460043	-0.00912256	0.589472
rs17032400	0.000722583	0.969647	-0.00290533	0.873715	0.0289011	0.134134	-0.0306919	0.121146	0.0310091	0.133212	0.00051126	0.974157	0.000722583	0.969647	-0.00354185	0.630815	0.0283504	0.0262949	-0.0312517	0.0184025	0.0236134	0.244219	-0.00544574	0.724732
rs17251689	0.0305238	0.224802	0.0152822	0.527833	0.00112851	0.964775	0.0242704	0.354741	-0.0155019	0.569535	0.010311	0.620543	0.0305238	0.224802	-0.0116106	0.234259	-0.022143	0.190249	0.000625433	0.971598	-0.020127	0.45183	0.00660502	0.746118
rs17420654	0.0137658	0.50406	0.0118755	0.549323	0.0318562	0.128062	-0.0088869	0.679189	0.00704008	0.75269	0.00683672	0.688813	0.0137658	0.50406	-0.000250733	0.974988	0.0213675	0.12283	-0.0195529	0.174164	0.000848228	0.969151	0.00186952	0.911001
rs17589603	-0.029052	0.345435	-0.0384227	0.194844	-0.0324426	0.299785	-0.0345045	0.282608	-0.0193671	0.562978	-0.024157	0.345034	-0.029052	0.345435	-0.0128341	0.282903	-0.010304	0.61865	-0.0120024	0.576803	-0.0169673	0.605606	-0.022232	0.374947
rs17663165	-0.00373779	0.845916	-0.0149076	0.420687	-0.0125799	0.519779	-0.0133942	0.504295	0.00824094	0.692997	0.00696834	0.662189	-0.00373779	0.845916	-0.0116152	0.119653	-0.00973138	0.451603	-0.0104988	0.434425	0.00642713	0.753724	0.0055131	0.724162
rs1787003	-0.00938111	0.628292	-0.00877417	0.638059	0.0167381	0.395251	-0.0295067	0.144206	0.00431256	0.837601	-0.0105283	0.512542	-0.00938111	0.628292	-0.00051047	0.945885	0.0238891	0.0665784	-0.0222411	0.100217	0.00148269	0.942761	-0.0128007	0.416269
rs179994	0.0167044	0.390988	0.0137861	0.462049	-0.0022025	0.911373	0.0247788	0.222391	0.0074374	0.724931	0.00731607	0.650545	0.0167044	0.390988	-0.000928859	0.902196	-0.0149362	0.253839	0.0118412	0.383941	0.00812032	0.695444	0.00786401	0.619077
rs1892423	-0.0030157	0.876196	-0.00194009	0.917072	0.0184451	0.348333	-0.0197301	0.32837	-0.00127026	0.951825	-0.00780462	0.627101	-0.0030157	0.876196	0.000716423	0.924026	0.0207436	0.110805	-0.0173941	0.19814	-0.00474793	0.818028	-0.0105962	0.50071
rs1895471	-0.0139549	0.501188	-0.00635133	0.750465	-0.0139102	0.509362	0.00195192	0.928121	0.0261297	0.246741	-0.00538319	0.754829	-0.0139549	0.501188	0.00594216	0.460554	-0.0032753	0.814326	0.0127636	0.378372	0.0299416	0.176256	-0.00233034	0.890235
rs1953522	-0.0101787	0.600668	-0.0028741	0.877969	-0.00872477	0.658811	0.00305987	0.880071	0.016721	0.427777	-0.0191215	0.235272	-0.0101787	0.600668	0.00609264	0.419498	-0.000967501	0.940996	0.0109455	0.420243	0.021045	0.309208	-0.0156623	0.320999
rs2007481	-0.0245958	0.219407	-0.0348992	0.0702133	-0.0229676	0.259068	-0.0371621	0.0751698	0.00888622	0.682747	-0.00206476	0.901088	-0.0245958	0.219407	-0.0132383	0.0885695	-0.00422436	0.753737	-0.0181164	0.195301	0.00788413	0.711751	-0.00286891	0.860044
rs2077610	-0.0186843	0.330274	-0.000829024	0.964208	0.0329393	0.0911563	-0.030874	0.122906	0.0307035	0.140438	-0.0117311	0.461089	-0.0186843	0.330274	0.0156338	0.0358005	0.0471911	0.000251331	-0.0164045	0.221001	0.0294597	0.149511	-0.0127299	0.414154
rs2239647	0.0349538	0.0605644	0.0283384	0.113986	0.0182398	0.335252	0.0305431	0.115884	0.0171239	0.398561	0.0048312	0.755272	0.0349538	0.0605644	-0.00245443	0.73438	-0.00840712	0.502169	0.00346961	0.789809	0.0118431	0.551996	0.000589814	0.969016
rs2284871	0.0305459	0.129574	0.0353613	0.0682893	0.0121647	0.552511	0.0476023	0.0234854	-0.0389771	0.0753573	0.00429707	0.797547	0.0305459	0.129574	0.00845901	0.279625	-0.0111217	0.411795	0.0239549	0.0888073	-0.0379015	0.0780681	0.00516068	0.753107
rs2333604	0.0149686	0.44088	0.0168358	0.36782	0.022371	0.25695	0.00781444	0.699652	0.0319611	0.129716	-0.0136779	0.396129	0.0149686	0.44088	0.0036507	0.62819	0.0109649	0.400979	-0.00378154	0.780417	0.0297932	0.150102	-0.0154203	0.328706
rs2388334	-0.000590624	0.975025	0.0109035	0.548214	0.0150842	0.431337	0.00452721	0.818014	0.015927	0.437126	-0.0208706	0.18262	-0.000590624	0.975025	0.0114238	0.118644	0.0155343	0.220514	0.00498473	0.705168	0.0159279	0.428447	-0.0208699	0.173616
rs2420551	0.0318351	0.367549	0.0293137	0.388707	0.0320975	0.371271	0.0197448	0.592057	0.0100888	0.792419	0.0124737	0.670223	0.0318351	0.367549	0.00127079	0.926171	0.00783718	0.74142	-0.00491722	0.842056	0.00730825	0.845978	0.0102429	0.721075
rs2425161	0.00980622	0.691522	0.0203607	0.392039	0.0104403	0.677595	0.0243316	0.345128	0.0267011	0.320408	-0.0265627	0.195765	0.00980622	0.691522	0.011723	0.221588	0.0029669	0.858251	0.0167359	0.332182	0.0286873	0.276689	-0.024971	0.214348
rs2426132	-0.0081811	0.670871	-0.000984736	0.957622	-0.0239821	0.220176	0.0198508	0.322783	-0.0184046	0.379036	-0.0114413	0.474191	-0.0081811	0.670871	0.00622222	0.404966	-0.017748	0.170166	0.0261896	0.0513667	-0.0117456	0.567444	-0.00609615	0.697144
rs2457192	0.00151165	0.945828	-0.00393207	0.854316	-0.00197118	0.930515	-0.00473926	0.838149	-0.0415393	0.0856006	0.0177181	0.337307	0.00151165	0.945828	-0.00526367	0.542102	-0.00312324	0.834557	-0.00591026	0.703639	-0.0430492	0.0694637	0.0165081	0.361384
rs2478295	0.00576051	0.786501	0.00438474	0.830403	0.0352702	0.1026	-0.0243366	0.272504	0.0380325	0.0995573	-0.00895969	0.61166	0.00576051	0.786501	-0.000689648	0.933413	0.0308807	0.0307053	-0.0287996	0.0524374	0.0295091	0.193122	-0.0158383	0.359716
rs2726513	-0.0163002	0.394112	-0.0192705	0.295251	0.0052683	0.786353	-0.0365977	0.0665107	-0.0063346	0.760677	0.0168266	0.28962	-0.0163002	0.394112	-0.0049128	0.508153	0.0176945	0.168741	-0.0239755	0.0726544	-0.0104015	0.610352	0.0135698	0.383326
rs2765042	-0.00975637	0.623943	-0.0131605	0.49205	-0.00519848	0.797114	-0.0171151	0.409541	0.00720048	0.739068	0.0146625	0.374687	-0.00975637	0.623943	-0.00456646	0.554355	0.00223716	0.867176	-0.009558	0.491609	0.00672221	0.751346	0.0142789	0.377424
rs2819336	0.0260816	0.180374	0.0249206	0.183604	0.0239107	0.226818	0.01981	0.329275	0.0184195	0.384672	-0.0183403	0.257272	0.0260816	0.180374	0.00194655	0.79678	0.00403537	0.757891	-0.000394187	0.97688	0.0124912	0.548154	-0.0231159	0.144979
rs28549862	-0.0379839	0.079876	-0.0242685	0.245084	-0.0413188	0.0607901	-0.0031393	0.889633	0.0294628	0.210519	-0.0360884	0.0446872	-0.0379839	0.079876	0.00919877	0.274707	-0.0123809	0.395973	0.0263065	0.0825311	0.038282	0.0974972	-0.0290741	0.0988712
rs28612284	-0.0412528	0.589187	-0.0517359	0.481693	0.00915068	0.90616	-0.093782	0.239104	-0.0952986	0.250212	0.0243456	0.70068	-0.0412528	0.589187	-0.0153979	0.603526	0.0405934	0.429204	-0.0618305	0.246444	-0.104397	0.199322	0.017055	0.783369
rs28657585	-0.0264104	0.361289	-0.0109174	0.695037	-0.0166421	0.571317	-0.00315483	0.916726	-0.0285552	0.363504	0.0184247	0.442881	-0.0264104	0.361289	0.0123501	0.271393	0.00348653	0.857726	0.0173078	0.391676	-0.0223235	0.469213	0.0234366	0.319031
rs28892332	-0.051475	0.284416	-0.0702833	0.128882	-0.0428467	0.380558	-0.0778927	0.120346	-0.107043	0.039286	0.0244793	0.537415	-0.051475	0.284416	-0.0249472	0.181357	-0.00361779	0.910899	-0.0380295	0.257516	-0.109329	0.031938	0.0226468	0.560205
rs2906455	0.00141373	0.963257	0.00356702	0.903888	0.0128286	0.680782	-0.00558918	0.861368	0.00316685	0.924453	-0.00514637	0.840169	0.00141373	0.963257	0.00232168	0.845448	0.0117511	0.568885	-0.00668432	0.755121	0.00145277	0.964644	-0.00652176	0.794137
rs3092073	0.0199126	0.291898	0.0115233	0.526337	0.0134372	0.483978	0.00702763	0.721358	-0.0339537	0.0975784	0.033449	0.0326603	0.0199126	0.291898	-0.00601933	0.411776	-0.00173904	0.8911	-0.00840012	0.524426	-0.0388812	0.0532529	0.0295213	0.0542962
rs34172651	-0.0453125	0.0304004	-0.0342187	0.0894753	-0.0242527	0.254266	-0.0348853	0.11007	-0.0161407	0.477933	-0.0203134	0.242448	-0.0453125	0.0304004	0.00570394	0.482981	0.0102938	0.464777	0.000216143	0.988213	-0.00984391	0.659306	-0.0152656	0.369941
rs34180096	0.0215322	0.272624	0.0156979	0.406053	0.0108109	0.587794	0.016286	0.426271	-0.0266761	0.211487	0.0256689	0.115578	0.0215322	0.272624	-0.00327063	0.667735	-0.00560094	0.671237	-0.000394008	0.977073	-0.0308994	0.140315	0.022294	0.162966
rs34305371	-0.0143399	0.687622	-0.0269275	0.432796	-0.0429118	0.236317	-0.00611141	0.869487	-0.0401155	0.299237	0.00383871	0.896572	-0.0143399	0.687622	-0.0142963	0.301643	-0.0319845	0.182078	0.00499715	0.840984	-0.0368576	0.331133	0.00645444	0.823413
rs34627	0.0146622	0.438091	0.00484827	0.789959	0.026204	0.172582	-0.0154495	0.433363	0.000982149	0.961829	-0.00372979	0.811991	0.0146622	0.438091	-0.00806883	0.271561	0.0150321	0.236923	-0.0268119	0.0422786	-0.00518095	0.797051	-0.0086776	0.572184
rs34811474	-0.0149809	0.629981	-0.0212003	0.478775	-0.00286252	0.927818	-0.0325076	0.31614	0.0650951	0.0533521	-0.0194116	0.450932	-0.0149809	0.629981	-0.00800423	0.507195	0.00855526	0.682323	-0.0209039	0.335747	0.0613377	0.0636004	-0.0224328	0.373755
rs35891966	0.107217	0.0445751	0.0987236	0.0546836	0.0788147	0.146243	0.092726	0.095802	-0.0576126	0.320284	0.0422386	0.340278	0.107217	0.0445751	0.0042815	0.836395	-0.00290073	0.935614	0.00968092	0.795254	-0.0682576	0.230237	0.0337198	0.437061
rs36004779	0.00983672	0.70501	0.0163777	0.512589	0.0283397	0.283078	0.0017105	0.949671	-0.00545555	0.846777	-0.00235752	0.912979	0.00983672	0.70501	0.00771288	0.444372	0.0208438	0.232666	-0.00590971	0.744676	-0.00750406	0.786523	-0.00400101	0.849813
rs36162392	0.0196829	0.524386	0.042024	0.157901	0.0402959	0.199592	0.0334284	0.299858	0.0294799	0.378697	-0.0339232	0.184899	0.0196829	0.524386	0.0246882	0.0396066	0.0252979	0.223486	0.0181831	0.399741	0.0289479	0.378415	-0.0343501	0.170465
rs3817334	0.00641353	0.741603	0.00756555	0.686152	-0.00235302	0.905233	0.0146231	0.470975	0.0149952	0.477743	-0.0135243	0.402034	0.00641353	0.741603	0.00191598	0.799646	-0.0072411	0.579676	0.00965518	0.477202	0.0161698	0.435349	-0.0125825	0.426032
rs3850610	0.0021524	0.919783	0.0135797	0.509195	-0.0146107	0.501084	0.035551	0.110664	0.0326194	0.159833	-0.0239932	0.176021	0.0021524	0.919783	0.0116837	0.158915	-0.0162511	0.257918	0.0338837	0.0231511	0.0408313	0.0730973	-0.0174506	0.31524
rs3914453	0.0230082	0.229211	0.0213181	0.247119	0.0238044	0.220848	0.0139455	0.484701	0.00867644	0.67604	0.0127116	0.422986	0.0230082	0.229211	0.00105076	0.887516	0.00627184	0.625906	-0.0038792	0.771658	0.00539622	0.791165	0.0100808	0.51653
rs39302	-0.00219281	0.927907	-0.00021617	0.992607	0.0117942	0.631987	-0.0109212	0.665674	0.0354383	0.178472	-0.0114474	0.569529	-0.00219281	0.927907	0.00171546	0.855285	0.0134654	0.408445	-0.00922258	0.585811	0.0330693	0.200788	-0.0133505	0.49827
rs407102	0.0376546	0.0882565	0.0136369	0.521358	0.0280441	0.21154	-0.00255868	0.911578	0.00484434	0.839629	0.00254628	0.889285	0.0376546	0.0882565	-0.019548	0.0226266	-0.000653632	0.964906	-0.0317526	0.0396129	-0.00685448	0.770655	-0.00684234	0.702755
rs421211	0.0455849	0.0150427	0.0398735	0.0271568	0.0321058	0.0920058	0.0372063	0.0571008	-0.0311204	0.126726	0.0274054	0.0783854	0.0455849	0.0150427	-0.000282245	0.969096	-0.00263947	0.834294	0.00189716	0.884929	-0.0373358	0.0619818	0.0224544	0.141064
rs424029	-0.0299484	0.559322	0.00468336	0.924433	0.059426	0.254194	-0.045478	0.395239	0.0835872	0.13583	-0.0562362	0.189109	-0.0299484	0.559322	0.0310675	0.118587	0.0822577	0.0170065	-0.0222807	0.533967	0.0852709	0.121037	-0.0548862	0.190667
rs4294650	0.016309	0.429745	0.0156385	0.431516	0.021711	0.300888	0.00642486	0.765502	-0.00831641	0.710678	0.00581253	0.734379	0.016309	0.429745	0.00127223	0.87391	0.00928312	0.503738	-0.00620992	0.666844	-0.0115154	0.600732	0.00324777	0.846525
rs4636654	0.0351686	0.0710623	0.0370779	0.0480241	0.0345307	0.0811234	0.0304097	0.13452	0.0339333	0.109187	-0.0249016	0.123947	0.0351686	0.0710623	0.00610358	0.419839	0.0077349	0.555008	0.00316921	0.815937	0.0304915	0.142506	-0.0276732	0.0809042
rs4690029	-0.0115605	0.539346	-0.00297621	0.869604	0.0219316	0.25177	-0.0245669	0.211	0.0197958	0.333586	-0.0104305	0.504936	-0.0115605	0.539346	0.00720805	0.324086	0.0307452	0.0151231	-0.0156132	0.235198	0.0182981	0.362453	-0.0116331	0.447714
rs4720476	0.0577874	0.00363782	0.0690501	0.000305085	0.0724166	0.000333975	0.0493678	0.0172355	0.0321561	0.137493	-0.00584229	0.724016	0.0577874	0.00363782	0.0181872	0.0185216	0.0284406	0.033481	0.00461357	0.73998	0.0265474	0.211648	-0.0103581	0.522809
rs4781499	-0.000554664	0.983155	-0.00713057	0.777958	-0.01099	0.680556	-0.00195271	0.943181	-0.0448958	0.115938	0.0428582	0.0495047	-0.000554664	0.983155	-0.00664197	0.514747	-0.0105672	0.549536	-0.00152304	0.933838	-0.0450185	0.108213	0.0427598	0.0454044
rs4852252	0.0201263	0.297884	0.0153072	0.410799	0.000824236	0.966537	0.0245844	0.222733	0.0236221	0.260722	-0.0136059	0.396565	0.0201263	0.297884	-0.0024225	0.746862	-0.0145186	0.263967	0.00899626	0.505303	0.0229413	0.26571	-0.0141524	0.367938
rs4925114	-0.00284581	0.886367	-0.00579425	0.762444	-0.00539143	0.789901	-0.00475645	0.818852	0.0168323	0.435953	-0.0303425	0.0660243	-0.00284581	0.886367	-0.00328742	0.670581	-0.00322261	0.809745	-0.00255197	0.854406	0.0169586	0.423833	-0.0302412	0.0613988
rs516902	0.0158525	0.410624	0.0160146	0.387846	0.000920569	0.962497	0.0256683	0.20141	-0.0357561	0.087324	0.0205691	0.198076	0.0158525	0.410624	0.00205066	0.783922	-0.0111629	0.388731	0.0133906	0.319661	-0.0362133	0.0776591	0.0202024	0.196823
rs527825	0.00271616	0.886954	0.0244102	0.18437	0.00929564	0.632075	0.0320558	0.107614	0.0118252	0.568707	-0.0214672	0.175648	0.00271616	0.886954	0.0220177	0.00296833	0.00722565	0.573675	0.0299519	0.024735	0.0185621	0.362123	-0.016086	0.300361
rs55985762	-0.0355872	0.140013	-0.042176	0.0692004	-0.00291661	0.905266	-0.0671591	0.00755559	-0.0474492	0.0700208	0.0129624	0.517223	-0.0355872	0.140013	-0.010834	0.247192	0.0242192	0.135236	-0.0396148	0.0186634	-0.051183	0.0464387	0.00997425	0.61092
rs56150095	-0.000284701	0.98816	0.00219789	0.90526	0.0186478	0.338739	-0.0130662	0.513705	-0.0172917	0.407549	0.0112005	0.482629	-0.000284701	0.98816	0.00244868	0.742248	0.0188648	0.143423	-0.0128457	0.337629	-0.0193825	0.344174	0.00952488	0.542152
rs56151722	-0.00500058	0.826804	-0.0117683	0.59268	-0.0113701	0.624401	-0.00928432	0.696882	0.0383114	0.122611	-0.0287465	0.129493	-0.00500058	0.826804	-0.00736342	0.406426	-0.00755922	0.622655	-0.00541071	0.734602	0.0389091	0.110095	-0.0282672	0.127976
rs5758605	-0.00776217	0.695032	0.00600347	0.752763	0.00479679	0.811553	0.00563516	0.78493	0.00937192	0.663254	-0.00792867	0.629734	-0.00776217	0.695032	0.0128416	0.0946398	0.0107129	0.420828	0.0116486	0.399531	0.0116254	0.582075	-0.00612187	0.703916
rs59663815	-0.0065378	0.764747	0.0020169	0.923594	-0.00340792	0.877992	0.00638889	0.779165	-0.00495206	0.834765	-0.0102765	0.571033	-0.0065378	0.764747	0.00777618	0.359061	0.00157469	0.914605	0.0114537	0.452814	-0.00227768	0.922124	-0.00813137	0.647195
rs61104616	-0.0143555	0.449832	-0.00435601	0.811715	-0.0139272	0.470589	0.00526798	0.790317	0.00192516	0.925592	-0.0258585	0.100587	-0.0143555	0.449832	0.00829085	0.26079	-0.00298711	0.815048	0.0163909	0.216633	0.00639944	0.751788	-0.0222782	0.14872
rs6124077	0.00295578	0.886005	-0.000675308	0.972856	0.013848	0.5086	-0.0135203	0.52948	0.000482991	0.982815	0.0346335	0.0431852	0.00295578	0.886005	-0.00327905	0.681958	0.0115954	0.402735	-0.01581	0.27215	-0.00387144	0.860371	0.0311493	0.0634018
rs61544985	0.0349561	0.0665191	0.0311593	0.0892923	0.0406786	0.0355903	0.0151121	0.446964	0.0431442	0.0368298	-0.0125397	0.427258	0.0349561	0.0665191	0.00036707	0.96043	0.0140507	0.272803	-0.0119775	0.368267	0.0351435	0.0833356	-0.0190116	0.219333
rs62037363	0.014529	0.461309	0.00581117	0.759527	0.00204745	0.918625	0.00777953	0.705264	0.0155448	0.468139	8.60596e-05	0.995806	0.014529	0.461309	-0.00698834	0.361261	-0.00902671	0.495941	-0.00347584	0.800777	0.0132206	0.529536	-0.00177977	0.911628
rs62047280	0.0251574	0.299481	0.0306352	0.189304	0.0193156	0.433063	0.0333791	0.186816	0.0413429	0.118012	-0.027495	0.173675	0.0251574	0.299481	0.0084767	0.36778	0.000142768	0.993012	0.013895	0.411959	0.0381648	0.141483	-0.0300513	0.12897
rs62236533	0.0122696	0.73715	0.0207974	0.554499	0.0457011	0.218539	-0.00652787	0.86405	0.0537087	0.176646	0.00345595	0.90942	0.0122696	0.73715	0.00998954	0.481372	0.0363513	0.138988	-0.016033	0.529993	0.0500405	0.199594	0.000510364	0.986314
rs62253086	-0.0436181	0.208279	-0.0307539	0.356712	-0.0189933	0.589757	-0.0338643	0.348915	0.045263	0.231345	-0.0395174	0.171427	-0.0436181	0.208279	0.00767217	0.568599	0.014255	0.540781	-7.56534e-05	0.997507	0.0506492	0.172351	-0.0352073	0.213523
rs62358087	-0.0231426	0.3427	0.00261858	0.911197	0.0324425	0.190495	-0.0247257	0.331024	0.013522	0.609365	-0.0115445	0.568035	-0.0231426	0.3427	0.0230103	0.0150415	0.050092	0.00223653	-0.00679999	0.689778	0.0151422	0.559852	-0.0102452	0.604933
rs62439690	-0.0377386	0.0830718	-0.0405008	0.0533102	0.00543963	0.805835	-0.0718721	0.00154322	0.00175337	0.9411	-0.00280931	0.876872	-0.0377386	0.0830718	-0.00726312	0.390353	0.0342286	0.0193817	-0.0426726	0.00501595	-0.00129186	0.955765	-0.00525309	0.767398
rs66886492	0.0262115	0.39627	0.0457552	0.123914	0.0345996	0.27044	0.0447027	0.165337	0.00525794	0.875521	-0.0297085	0.246671	0.0262115	0.39627	0.0226701	0.0586733	0.0146262	0.48133	0.0244028	0.258127	0.00691955	0.833617	-0.0283759	0.258587
rs6760964	-0.0402776	0.03461	-0.0276156	0.132383	-0.010904	0.573587	-0.0359179	0.0708342	-0.00823842	0.691159	0.00840004	0.596012	-0.0402776	0.03461	0.00787398	0.287594	0.0198161	0.122249	-0.00472272	0.723009	-0.00437303	0.829881	0.0115052	0.45852
rs6778735	-0.0124937	0.517086	-0.0350927	0.0586472	-0.0519843	0.00795436	-0.011493	0.567706	-0.0152358	0.466799	0.0279911	0.0801202	-0.0124937	0.517086	-0.0240898	0.00127939	-0.0424674	0.00104448	-0.00181497	0.892807	-0.0132734	0.518295	0.0295682	0.0591045
rs6819372	0.0100783	0.589855	0.00609412	0.734897	0.00351988	0.853014	0.00692882	0.722331	0.00157349	0.938213	0.0130553	0.399918	0.0100783	0.589855	-0.00278396	0.701238	-0.00416129	0.740559	-0.00087836	0.946368	-0.000105118	0.99579	0.0117091	0.440825
rs7010173	0.0127161	0.514438	0.0143691	0.444066	0.0152878	0.440488	0.010078	0.620295	-0.00985867	0.641986	0.00894408	0.580934	0.0127161	0.514438	0.00316804	0.6756	0.00559726	0.669447	0.000227596	0.98667	-0.0124582	0.549416	0.00686032	0.665539
rs7038525	0.01728	0.477838	0.0147773	0.528314	0.0145948	0.555208	0.011374	0.654178	0.0233012	0.379429	-0.00896906	0.657939	0.01728	0.477838	-0.000444499	0.962482	0.00142558	0.930585	-0.00201217	0.905799	0.0211829	0.415539	-0.0106699	0.59073
rs704444	0.00573917	0.763174	0.0141212	0.441159	-0.00308718	0.873267	0.0261257	0.188389	0.016652	0.421745	-0.00360593	0.819898	0.00573917	0.763174	0.00906587	0.220007	-0.00746129	0.560028	0.0216804	0.103064	0.0216661	0.286897	0.00040967	0.978935
rs71413877	0.0105169	0.860773	-0.0197606	0.73208	-0.0217645	0.720935	-0.0131961	0.832874	0.0508855	0.433197	-0.00414096	0.933481	0.0105169	0.860773	-0.0290251	0.212272	-0.0297798	0.45997	-0.0213432	0.610269	0.0444722	0.485225	-0.00928979	0.84839
rs7186834	0.0189281	0.325265	0.0176263	0.341271	0.0267977	0.170474	0.00515732	0.79719	0.0121341	0.561612	1.60213e-05	0.9992	0.0189281	0.325265	0.000953027	0.898471	0.0123755	0.3387	-0.00950774	0.479295	0.00729948	0.722041	-0.00386672	0.804825
rs72801843	0.0146449	0.509626	0.00972264	0.649254	0.0374938	0.0965666	-0.0174977	0.449964	-0.0144988	0.547749	0.000797501	0.965484	0.0146449	0.509626	-0.00317826	0.712343	0.0263357	0.0776576	-0.0288457	0.0628647	-0.0222418	0.347552	-0.00540546	0.764673
rs73189617	-0.0233162	0.276192	-0.0160913	0.434987	-0.0128703	0.554184	-0.0150923	0.499159	0.0214875	0.354584	-0.023861	0.178478	-0.0233162	0.276192	0.0044491	0.592468	0.00490098	0.733519	0.00297047	0.842574	0.026634	0.242379	-0.0197467	0.255704
rs7365380	-0.0145973	0.437852	-0.0109037	0.547147	-0.00701219	0.713794	-0.0117574	0.549057	0.00656921	0.748074	-0.00795065	0.610934	-0.0145973	0.437852	0.00195517	0.788915	0.00411332	0.745021	-0.000449724	0.9727	0.00964255	0.630976	-0.00548704	0.720013
rs743134	0.0291708	0.132702	0.0295203	0.11394	0.0349099	0.076576	0.0175676	0.385318	0.0090076	0.668909	0.00201892	0.900174	0.0291708	0.132702	0.00382639	0.611492	0.0126861	0.330842	-0.00503252	0.710442	0.00366969	0.859127	-0.00226629	0.88571
rs74370218	0.00675664	0.732192	0.00675307	0.722344	-0.00139376	0.944614	0.0124199	0.546391	-0.029186	0.174114	0.0313158	0.0562947	0.00675664	0.732192	0.000801234	0.916725	-0.00654332	0.621977	0.00718609	0.602248	-0.0282941	0.179414	0.0320321	0.0462127
rs74796574	-0.023696	0.661823	-0.00282661	0.956773	-0.0432761	0.431766	0.0340848	0.546318	-0.0250537	0.670424	-0.0450888	0.316149	-0.023696	0.661823	0.0180479	0.390675	-0.0252183	0.488598	0.0524435	0.165654	-0.0108715	0.850776	-0.0337209	0.444133
rs7487854	0.0414989	0.278344	0.00452795	0.90221	0.0150187	0.699442	-0.00596117	0.881315	0.0361899	0.384082	0.0021688	0.945577	0.0414989	0.278344	-0.0320382	0.0310379	-0.0166136	0.518583	-0.0381203	0.153935	0.0196834	0.629743	-0.0111062	0.721316
rs74944275	-0.0207822	0.693789	-0.0204907	0.686736	0.0254182	0.635562	-0.0566637	0.303293	0.150972	0.00813897	-0.120533	0.00569017	-0.0207822	0.693789	-0.00218393	0.915103	0.0412584	0.244846	-0.0405665	0.271093	0.146513	0.00887714	-0.124122	0.00364519
rs750472	0.0414755	0.0302722	0.0278451	0.130834	0.0242858	0.211956	0.024312	0.223432	0.0466952	0.0246506	-0.00129665	0.934945	0.0414755	0.0302722	-0.00870131	0.241948	-0.00733274	0.569132	-0.00782682	0.558619	0.0411085	0.0439172	-0.00579987	0.709388
rs7534501	-0.0389035	0.0411498	-0.040436	0.0274483	-0.0307672	0.112024	-0.0393358	0.0477322	-0.0294404	0.154088	-0.00539115	0.732709	-0.0389035	0.0411498	-0.00617325	0.404144	-0.0011194	0.9304	-0.00920973	0.489152	-0.0256026	0.206672	-0.00230731	0.881384
rs7583067	0.0282691	0.226344	0.0217093	0.334454	0.0185294	0.435167	0.0193174	0.427969	0.0198025	0.434551	0.000709752	0.970762	0.0282691	0.226344	-0.00319395	0.724762	-0.00301616	0.847752	-0.00258224	0.874299	0.0140541	0.572077	-0.00390812	0.836773
rs7590388	0.0141663	0.461538	0.00748745	0.685998	0.006101	0.754987	0.00692197	0.730116	-0.0580885	0.00534269	0.0279762	0.0792212	0.0141663	0.461538	-0.00499227	0.503792	-0.0046961	0.716526	-0.00405252	0.762966	-0.0605776	0.00307479	0.0259869	0.0960055
rs7599488	-0.0241067	0.204995	-0.0242429	0.185444	-0.0232629	0.228716	-0.019269	0.331358	0.0381728	0.0642392	-0.0183499	0.244411	-0.0241067	0.204995	-0.00300882	0.683656	-0.00489287	0.702012	-0.000595096	0.964276	0.0401705	0.0472203	-0.0167505	0.277993
rs7609050	-0.0119296	0.529679	-0.0152236	0.404714	-0.00666769	0.729568	-0.0192122	0.331765	0.000837948	0.967538	-0.00826543	0.599322	-0.0119296	0.529679	-0.00471535	0.522133	0.00242436	0.849303	-0.00997197	0.451898	0.000387681	0.984693	-0.00862672	0.575576
rs7618519	-0.0023379	0.901986	-0.00483319	0.791398	0.00255537	0.89461	-0.0102842	0.603438	-0.00465243	0.821566	0.0048178	0.759868	-0.0023379	0.901986	-0.00277376	0.706559	0.00433715	0.733929	-0.00847323	0.522725	-0.00700821	0.72922	0.00292852	0.849555
rs7633520	0.0174616	0.411854	0.0191561	0.34964	0.019372	0.37026	0.014339	0.518181	0.0156795	0.497613	0.000310145	0.985992	0.0174616	0.411854	0.00377505	0.647616	0.00606529	0.671544	0.000812557	0.956398	0.0132933	0.557932	-0.00160533	0.926075
rs7699872	0.0136302	0.5017	0.0296468	0.128947	0.0292957	0.155257	0.0228053	0.281093	0.0224298	0.308775	-0.0102637	0.542195	0.0136302	0.5017	0.0176423	0.0250178	0.0189102	0.165521	0.0122483	0.387348	0.022102	0.306802	-0.0105267	0.523312
rs77482156	0.0717583	0.0820471	0.0667782	0.0927353	0.0912448	0.0295304	0.0287458	0.504241	0.111352	0.0127178	-0.0340398	0.319026	0.0717583	0.0820471	0.00356993	0.823714	0.0365864	0.18737	-0.0268634	0.351513	0.0939405	0.0323208	-0.0481496	0.150322
rs7763264	-0.00857284	0.659751	-0.0145902	0.436317	-0.0238967	0.227105	-0.00273295	0.892948	0.0261376	0.21657	-0.0144752	0.370479	-0.00857284	0.659751	-0.00703879	0.351641	-0.0173641	0.184581	0.00390818	0.773816	0.0290302	0.16198	-0.0121593	0.44247
rs78066960	0.018432	0.376787	0.0200805	0.317152	0.00634726	0.764546	0.0275339	0.205501	-0.00935461	0.679607	0.00725793	0.674951	0.018432	0.376787	0.00384468	0.634822	-0.00770172	0.582758	0.0132584	0.362682	-0.00829386	0.709064	0.00810923	0.632373
rs7814022	0.0198462	0.287342	0.0253572	0.157845	0.0140512	0.458498	0.0293629	0.131163	-0.00332519	0.869796	0.00790086	0.610238	0.0198462	0.287342	0.00787726	0.276608	-0.0010742	0.931738	0.0139934	0.282787	-0.00412331	0.835917	0.00726063	0.632463
rs7873907	0.038714	0.0394593	0.0405131	0.0251576	0.0517289	0.00675653	0.0206886	0.291413	0.0146428	0.473215	-0.00797714	0.609084	0.038714	0.0394593	0.00641765	0.379449	0.0222498	0.0784567	-0.00931166	0.478512	0.00650825	0.745446	-0.0145269	0.34196
rs79245415	-0.0463923	0.22421	-0.0171237	0.641204	0.0078948	0.838719	-0.0353986	0.373896	-0.0381301	0.357587	-0.00198097	0.950126	-0.0463923	0.22421	0.0237524	0.108895	0.0432685	0.091739	0.000539291	0.983864	-0.0300043	0.460794	0.0045467	0.883484
rs79582714	0.0198733	0.514779	0.0179254	0.541592	0.01695	0.584532	0.0144723	0.649211	-0.00785165	0.812915	0.0347764	0.17005	0.0198733	0.514779	0.000419249	0.971756	0.00180441	0.929887	-0.000922588	0.965463	-0.0109642	0.736306	0.0322818	0.193493
rs7963801	0.00700843	0.723229	0.0141576	0.457336	-0.00317155	0.874677	0.0262614	0.203172	-0.00186536	0.930851	-0.00640243	0.696694	0.00700843	0.723229	0.00798419	0.298524	-0.00851309	0.52217	0.020833	0.131648	0.00173537	0.934448	-0.00351449	0.827089
rs7978070	0.0301285	0.111641	0.0193007	0.289762	0.0295046	0.125229	0.00550266	0.780586	-0.0105294	0.608796	0.00477358	0.761389	0.0301285	0.111641	-0.00724422	0.324547	0.0065476	0.607177	-0.0178485	0.177337	-0.0191031	0.344358	-0.00208844	0.892175
rs7998050	-0.0127682	0.530299	-0.0170456	0.384094	-0.0048951	0.812835	-0.023814	0.261707	0.0156119	0.479253	0.0018178	0.914147	-0.0127682	0.530299	-0.00579885	0.462742	0.00483625	0.723628	-0.0139246	0.327089	0.0142858	0.509457	0.000753538	0.963606
rs80170948	0.0301512	0.564075	0.00122804	0.980529	-0.0136197	0.797633	0.0142302	0.794074	-0.00696621	0.902252	0.0568303	0.189712	0.0301512	0.564075	-0.0253341	0.211734	-0.0366017	0.297535	-0.00912715	0.802581	-0.0168124	0.76265	0.0489444	0.248904
rs830386	0.0294848	0.182485	0.0246634	0.246674	0.0329392	0.142716	0.0112979	0.6243	0.0436153	0.0693366	-0.00887655	0.62863	0.0294848	0.182485	-0.00131016	0.878729	0.0104733	0.481249	-0.011548	0.454804	0.0374629	0.112024	-0.0138341	0.441633
rs889956	0.0390073	0.0465225	0.0225619	0.231721	0.0172686	0.385893	0.021857	0.284927	0.000418204	0.984342	0.00294469	0.856479	0.0390073	0.0465225	-0.011812	0.120621	-0.0124729	0.344007	-0.00836889	0.541146	-0.00608991	0.770959	-0.00227513	0.88659
rs909674	0.027844	0.187251	0.0208774	0.304325	0.0450986	0.0355112	-0.00585585	0.79031	0.00685087	0.765992	0.0136582	0.437413	0.027844	0.187251	-0.00365175	0.655964	0.0238895	0.0923618	-0.027438	0.0627966	-0.00420715	0.852382	0.00480002	0.780705
rs9295486	-0.0375837	0.0469374	-0.0272379	0.13472	-0.0177685	0.355361	-0.0291448	0.139625	0.00223932	0.913263	-0.0165335	0.292532	-0.0375837	0.0469374	0.00587544	0.423876	0.0108863	0.392235	-3.0786e-05	0.998142	0.00652907	0.74627	-0.0130976	0.39466
rs935116	-0.015068	0.449418	-0.0205827	0.28308	-0.0216596	0.28459	-0.0146501	0.480715	-0.051	0.0184716	0.0255108	0.123066	-0.015068	0.449418	-0.00731058	0.344396	-0.0101775	0.44724	-0.00297819	0.830508	-0.0508561	0.0166658	0.0256263	0.113751
rs9384679	0.052049	0.00822042	0.0550709	0.00366864	0.0511103	0.01065	0.0453256	0.0273489	0.0437635	0.0407071	-0.0248181	0.128844	0.052049	0.00822042	0.00923889	0.227368	0.0114644	0.387102	0.0050155	0.715736	0.0367559	0.0800168	-0.0304885	0.056877
rs9451649	0.0127293	0.51575	0.0111584	0.553948	0.00940522	0.636519	0.0100354	0.623225	0.0225074	0.29098	-0.0180778	0.266992	0.0127293	0.51575	-5.47158e-05	0.994257	-0.000296065	0.98206	0.000174659	0.989813	0.0203392	0.330896	-0.0198201	0.214036
rs9467777	0.00995968	0.654006	0.020424	0.33963	0.0149705	0.507315	0.0203786	0.379192	0.0398379	0.0989849	-0.0201926	0.273826	0.00995968	0.654006	0.0116512	0.17666	0.00738041	0.621221	0.0126641	0.414455	0.0421363	0.0753885	-0.018352	0.309921
rs9477970	0.030187	0.215321	0.029438	0.209369	0.0258394	0.296597	0.0255556	0.314524	-0.0117293	0.657175	0.0146511	0.468117	0.030187	0.215321	0.00284772	0.763348	0.00283452	0.862619	0.00217218	0.89844	-0.0169204	0.514203	0.010493	0.595794
rs9489945	0.00452717	0.813637	0.0120745	0.513627	0.0163899	0.400937	0.0052949	0.791493	-0.0443537	0.0336085	0.017485	0.273094	0.00452717	0.813637	0.0080867	0.277894	0.0129399	0.316099	0.00178797	0.893944	-0.0440559	0.0315123	0.017724	0.256676
rs9520384	-0.0100037	0.620832	-0.00999693	0.607562	-0.0257362	0.210368	0.0065132	0.75746	0.00430012	0.844793	-0.0240245	0.152256	-0.0100037	0.620832	-0.00118482	0.880013	-0.0181134	0.182644	0.0142635	0.312501	0.00916894	0.670638	-0.0201281	0.220821
rs9541479	0.0117939	0.539396	0.0213343	0.248739	-0.00218924	0.910734	0.0372539	0.0629937	0.0185998	0.372076	-0.0235049	0.139843	0.0117939	0.539396	0.0109462	0.142162	-0.0111787	0.386805	0.0281206	0.0360949	0.023647	0.247628	-0.0194721	0.211873
rs9597254	0.00128017	0.954969	-0.00179694	0.934373	0.0127288	0.580559	-0.0143733	0.543228	-0.04179	0.0899012	0.022295	0.236417	0.00128017	0.954969	-0.00292463	0.739586	0.0117531	0.440515	-0.015365	0.331769	-0.0441978	0.0675995	0.0203671	0.269475
rs9916613	0.00098621	0.959814	0.00142501	0.939708	0.0188155	0.344081	-0.014495	0.477619	0.0373185	0.0790188	-0.0243521	0.133638	0.00098621	0.959814	0.00055627	0.941623	0.0180639	0.169673	-0.015259	0.264229	0.0348194	0.0949646	-0.0263627	0.0973531
rs9921412	-0.027738	0.184933	-0.0151838	0.450936	-0.0432009	0.0421197	0.013575	0.533901	-0.046897	0.0390266	0.0283002	0.10314	-0.027738	0.184933	0.00925472	0.254535	-0.0220717	0.116615	0.0350788	0.0163579	-0.0362935	0.103936	0.036915	0.0300722
rs9934041	0.0132519	0.51194	0.00900482	0.643395	0.0107136	0.601818	0.00530081	0.801402	-0.0310954	0.155724	-0.00470563	0.778622	0.0132519	0.51194	-0.00266896	0.733627	0.000614148	0.963937	-0.0049653	0.724959	-0.0338614	0.115215	-0.00692251	0.672868
