# Supplementary material for: Genetic variation underlying cognition and its relation with neurological outcomes and brain imaging
Source: Aging (Albany NY). 2019 Mar 4;11(5):1440–56. doi: 10.18632/aging.101844 (PMC6428100; doi:10.18632/aging.101844)
Supplement: Supplementary Table S7 [file aging-11-101844-s008.xlsx]

## Sheet: Sheet1
Supplementary Table S7. Association of polygenic risk scores and individual genetic variants with tract-specific white matter microstructural integrity.
Abbreviations: anterior thalamic radiation (atr); cingulate gyrus part of cingulum (cgc); parahippocampal part of cingulum (cgh); corticospinal tract (cst); fractional anisotropy (FA); forceps major (fma_u); inferior fronto-occipital fasciculus (ifo); forceps minor (fmi_u); fornix (fx); inferior longitudinal fasciculus (ilf); medial cerebellar peduncle (mcp_u); mean diffusivity (MD); medial lemni…
	Model 1 (adjusted for age, sex, white matter and white matter lesion volume)
Determinant	Beta.FA_atr	p.FA_atr	Beta.FA_cgc	p.FA_cgc	Beta.FA_cgh	p.FA_cgh	Beta.FA_cst	p.FA_cst	Beta.FA_ifo	p.FA_ifo	Beta.FA_ilf	p.FA_ilf	Beta.FA_ml	p.FA_ml	Beta.FA_ptr	p.FA_ptr	Beta.FA_slf	p.FA_slf	Beta.FA_str	p.FA_str	Beta.FA_unc	p.FA_unc	Beta.FA_fma_u	p.FA_fma_u	Beta.FA_fmi_u	p.FA_fmi_u	Beta.FA_mcp_u	p.FA_mcp_u	Beta.FA_fx	p.FA_fx	Beta.MD_atr	p.MD_atr	Beta.MD_cgc	p.MD_cgc	Beta.MD_cgh	p.MD_cgh	Beta.MD_cst	p.MD_cst	Beta.MD_ifo	p.MD_ifo	Beta.MD_ilf	p.MD_ilf	Beta.MD_ml	p.MD_ml	Beta.MD_ptr	p.MD_ptr	Beta.MD_slf	p.MD_slf	Beta.MD_str
Polygenic score no threshold for the developmental component	0.0196761	0.105653	0.00463223	0.753159	0.0344053	0.0228236	0.0190351	0.214121	0.0157858	0.198531	0.0237298	0.0787936	0.0314391	0.0194413	0.0168147	0.171391	0.0175077	0.14413	0.0164269	0.248234	-0.00229011	0.856827	0.000943604	0.933973	0.0166862	0.170039	0.033861	0.0275041	-0.00541079	0.690719	-0.00723286	0.336561	-0.0100242	0.495426	-0.0256845	0.0869008	-0.0109769	0.22483	-0.0155188	0.118763	-0.00535026	0.627405	-0.0212815	0.200119	-0.0216608	0.0581651	-0.00302631	0.775777	-0.00646241
Polygenic score p>5e-8 for the developmental component	0.0136179	0.263282	0.0155549	0.291516	0.0304832	0.0440511	0.0138656	0.366218	0.0123722	0.314395	0.0136782	0.311827	0.0197453	0.14258	0.0113689	0.355632	0.0127421	0.288489	0.0122824	0.388715	-0.00947934	0.455744	-0.00249057	0.827144	0.0133063	0.274417	0.034085	0.0268119	-0.00741489	0.585962	-0.000523731	0.944581	0.00453409	0.75811	-0.0249848	0.096362	-0.00962036	0.288131	-0.0071321	0.474186	0.00307966	0.780295	-0.0199881	0.229209	-0.0167195	0.144133	0.00278194	0.793738	-0.00405831
Polygenic score p>1e-7 for the developmental component	0.0197007	0.1065	0.0174845	0.237104	0.0287493	0.0582877	0.0162194	0.291974	0.017178	0.163622	0.0180934	0.182181	0.0185736	0.168924	0.0141553	0.251487	0.0148291	0.218074	0.0160226	0.262208	-0.00596102	0.639994	-0.00312279	0.784797	0.0164421	0.178063	0.035403	0.021868	-0.00545779	0.689382	-0.000901742	0.904989	0.00103892	0.943905	-0.0239412	0.112134	-0.0119959	0.18664	-0.00863026	0.387806	0.00198259	0.857898	-0.0181657	0.275738	-0.0171772	0.13462	0.000544418	0.959314	-0.00569966
Polygenic score p>1e-6 for the developmental component	0.0226635	0.0640701	0.0165586	0.264202	0.0299175	0.0494107	0.0151354	0.326905	0.0189575	0.125272	0.0177971	0.190723	0.0210351	0.12005	0.0164151	0.184741	0.0155407	0.198029	0.0177162	0.216408	-0.00509767	0.690056	-0.00393449	0.731483	0.0196621	0.108267	0.0328836	0.0337461	-0.00192536	0.888182	0.000286764	0.969807	0.00347979	0.814197	-0.0231412	0.125695	-0.0106828	0.241028	-0.00830655	0.407179	0.00168212	0.879599	-0.013588	0.415972	-0.0176684	0.12483	0.00167084	0.875929	-0.00571989
Polygenic score p>1e-5 for the developmental component	0.0285094	0.0196657	0.0091528	0.536549	0.0326745	0.0315852	0.0143649	0.351604	0.0246281	0.0460389	0.0216851	0.110277	0.0270947	0.0448398	0.0189683	0.124725	0.0199662	0.0976594	0.018393	0.198731	0.00380715	0.76554	-0.00493455	0.666401	0.0222869	0.0682244	0.0272257	0.0783222	-0.00293743	0.82995	-0.000436458	0.954001	0.00967766	0.51273	-0.0173944	0.249007	-0.00821545	0.366741	-0.00880785	0.378683	0.00115126	0.917297	-0.012038	0.470352	-0.0161825	0.159111	0.000537166	0.959908	-0.00594551
Polygenic score p>1e-4 for the developmental component	0.0243151	0.0484101	0.0102975	0.490344	0.0333468	0.029552	0.0130257	0.402016	0.0240488	0.0533102	0.0187623	0.170544	0.0265834	0.0508328	0.0195604	0.116295	0.0187856	0.122157	0.0161148	0.263968	0.00310448	0.809414	-0.0067539	0.558268	0.0269155	0.0289219	0.011755	0.45093	-0.00557693	0.685965	0.00101907	0.893694	0.00827126	0.578912	-0.0147505	0.332259	-0.00118525	0.897206	-0.00650545	0.518954	0.00325717	0.770738	-0.00548398	0.744205	-0.0151128	0.19208	0.00309156	0.77412	-0.00390074
Polygenic score p>1e-3 for the developmental component	0.0250294	0.0418771	0.0129108	0.386258	0.0242146	0.113517	0.0150555	0.331985	0.0266065	0.0321997	0.0200616	0.142132	0.030077	0.0267894	0.0161413	0.194272	0.0166648	0.169561	0.0154862	0.282251	0.00892877	0.487049	-0.00930649	0.418865	0.0330806	0.00714686	0.0126925	0.414721	0.000509424	0.970451	-0.00389849	0.608674	0.0022003	0.88242	-0.00788982	0.603428	0.000904732	0.921323	-0.0068553	0.49595	0.00488429	0.66158	-0.00134098	0.936268	-0.016098	0.163986	0.00330679	0.758459	-0.00179619
Polygenic score p>0.01 for the developmental component	0.0120865	0.321771	0.0128046	0.386118	0.0216748	0.153034	0.00449508	0.770144	0.0230862	0.0608619	0.0153474	0.2573	0.0273429	0.0422067	0.0118389	0.336823	0.0116841	0.331451	0.0115344	0.419184	0.0150782	0.236452	-0.0131757	0.248135	0.0321351	0.00841917	0.0123918	0.42156	-0.00340663	0.80303	-0.00287391	0.703449	-0.00702794	0.633734	-0.00354543	0.813846	0.00356275	0.694782	-0.00596482	0.550131	-0.00192294	0.861981	-0.000534411	0.974347	-0.0109039	0.341596	-0.00391566	0.713456	0.00129998
Polygenic score p>0.05 for the developmental component	0.00864575	0.478838	0.00248813	0.866324	0.0191167	0.207905	-0.00813153	0.596975	0.0268972	0.0290057	0.0123332	0.362911	0.00662933	0.622397	0.0205669	0.0953661	0.00505992	0.674208	0.00374938	0.792922	0.00473112	0.710413	-0.0204807	0.0727491	0.0232307	0.0571903	0.0222125	0.149792	-0.000904571	0.947234	-0.00279157	0.711778	0.0101981	0.489483	-0.0161077	0.285012	0.00302034	0.73932	-0.00881722	0.377204	-0.000459885	0.966852	-0.0161775	0.330253	-0.0241303	0.0353917	0.00243865	0.819179	0.00450643
Polygenic score for educational attainment	0.0123542	0.308357	-0.00483062	0.74269	0.0178919	0.235532	0.024861	0.103732	0.00140097	0.908961	0.0198877	0.139828	0.0301981	0.0244341	0.00602861	0.623225	0.012365	0.301186	0.0129419	0.361859	-0.0118866	0.347953	0.0070626	0.534215	0.00182286	0.880706	0.0328535	0.0320285	-0.00356032	0.793082	-0.00740601	0.323761	-0.013367	0.362811	-0.0207228	0.166244	-0.0146397	0.104528	-0.01398	0.159016	-0.0084313	0.443274	-0.0176613	0.28648	-0.0149365	0.190626	-0.00136663	0.897417	-0.0068466
rs10145335	-0.00607789	0.755243	0.0529681	0.0247507	0.00949491	0.695292	0.00147346	0.952166	0.0279624	0.155671	0.00888062	0.681661	0.0196336	0.361001	0.0121542	0.537083	-0.00860435	0.654288	0.00625137	0.783942	0.0115756	0.569501	-0.0212376	0.244201	0.0338363	0.0829	-0.0240585	0.328502	-0.00273214	0.900194	0.0194338	0.107201	-0.0095614	0.684852	0.0092882	0.699454	-3.34829e-05	0.998157	-0.00208255	0.896189	0.0146282	0.407818	0.00477693	0.857122	0.0126954	0.488232	0.00489516	0.773761	-0.00568622
rs10514301	0.0120473	0.64332	-0.0354925	0.26064	-0.0191271	0.554758	-0.00148036	0.964033	-0.0214497	0.414866	-0.0048372	0.867108	0.0878995	0.00217655	0.00195511	0.940745	-0.0110816	0.665908	-0.0054068	0.859118	0.040876	0.132297	0.000620524	0.979658	0.0121213	0.64138	-0.0356307	0.2787	0.0166094	0.569551	0.00324239	0.840402	0.00051533	0.986948	0.00415232	0.897206	-0.0163443	0.398905	-0.0123149	0.56347	-0.0130711	0.579635	-0.0656399	0.0638134	-0.0207165	0.397098	0.000981562	0.965581	-0.0012395
rs10761765	0.0139409	0.523574	0.0152277	0.565255	-0.0274474	0.312527	-0.00863235	0.75388	0.0208055	0.345865	0.00899161	0.711035	-0.0329866	0.171468	-0.0185669	0.400523	-0.0106371	0.621512	0.0145551	0.56927	-0.000721676	0.974771	-0.00199033	0.922436	0.0230616	0.291672	0.0247956	0.369744	-0.0138052	0.573514	-0.0153191	0.257368	0.00158016	0.952337	0.0145584	0.589397	-0.000594985	0.970793	-0.0024207	0.892342	-0.00860171	0.664184	-0.00913294	0.759078	0.00788051	0.701278	-0.01587	0.405898	-0.00824862
rs10786662	0.0123346	0.475395	-0.0327489	0.117664	-0.0347182	0.106191	0.0228163	0.29505	-0.00721396	0.679491	0.00406031	0.832487	-0.0181292	0.341376	0.000745449	0.965963	-0.0148742	0.382616	0.0485427	0.0163582	-0.00996823	0.580727	-0.00670189	0.678386	-0.0170653	0.323956	0.0007144	0.973913	-0.00714679	0.712181	-0.0219468	0.0401146	0.0141219	0.499194	0.0338908	0.112064	-0.00795381	0.536292	-0.020038	0.156644	-0.0163231	0.297545	0.0289048	0.219074	-0.011387	0.483434	0.00744781	0.621834	-0.011917
rs10798879	0.0356968	0.0428913	-0.0275728	0.197576	0.0144706	0.509797	0.00939861	0.672535	0.0254435	0.153476	0.00209427	0.914946	0.0110843	0.569147	0.0133108	0.455505	0.00461227	0.790929	0.0251896	0.222604	0.0211261	0.251455	0.00921675	0.577001	0.00483401	0.784339	0.0130728	0.557811	0.0047456	0.81047	0.00295168	0.786808	-0.0134975	0.527542	-0.00248356	0.909252	-0.0142493	0.277563	-0.0103987	0.471619	-0.0105619	0.509356	-0.0158216	0.510325	-0.00163216	0.921636	-0.0165134	0.284154	-0.00895005
rs10806984	-0.0179724	0.323401	0.000234927	0.991506	0.0520629	0.0215669	-0.0179474	0.434611	-0.00422305	0.818493	0.00325283	0.872284	0.0157927	0.432066	0.0155876	0.397342	0.00849317	0.636377	0.00245806	0.908243	-0.00235566	0.901431	-0.0113936	0.503696	0.020103	0.270138	-0.0270096	0.241358	-0.0281987	0.167055	0.00385822	0.731955	-0.016634	0.450205	-0.0157486	0.483846	-0.00473535	0.726888	-0.0156606	0.293576	-0.00736511	0.655672	-0.0214198	0.387984	-0.0251906	0.141387	-0.0119791	0.451811	-0.00547628
rs10875914	0.0102638	0.55414	0.0137488	0.513743	0.0492858	0.0225134	0.0261366	0.232283	0.0410753	0.019213	0.0347298	0.0719671	0.0255002	0.183278	0.0194557	0.267705	0.020774	0.225137	0.0207846	0.306528	0.0259895	0.151792	0.0342477	0.0350576	0.0183351	0.29175	0.0014328	0.947972	-0.00788249	0.685216	0.00366664	0.732744	0.014334	0.495254	-0.0351173	0.101481	-0.0138077	0.285001	-0.0252108	0.0761971	-0.0100939	0.521847	0.0111966	0.635996	-0.0355787	0.0292884	-0.00391097	0.796686	-0.0042594
rs10996430	0.00739472	0.704818	0.0214491	0.364825	0.0301185	0.215234	0.011128	0.651554	0.0195647	0.321603	0.0198344	0.360735	-0.00433028	0.840763	0.0369161	0.061505	0.013138	0.495255	0.0248507	0.27721	0.0130519	0.522204	0.0248372	0.174188	-0.0126014	0.519421	-0.0349168	0.157975	-0.00221473	0.919278	0.00116503	0.923171	0.0203615	0.388844	0.000964813	0.968096	0.00914272	0.529575	-0.00518493	0.745828	0.0125495	0.478714	0.0330435	0.214168	-0.0280831	0.126235	-0.0131632	0.440726	-0.000421913
rs11126396	0.0310535	0.100489	-0.00282004	0.902109	-0.0213725	0.363594	0.0156844	0.510324	0.014796	0.439091	0.0155662	0.458724	-0.00324359	0.876452	0.0228952	0.230899	0.00649153	0.727793	0.0217564	0.325834	-0.0102484	0.60433	0.0259966	0.141589	-0.0128143	0.498311	-0.00792098	0.740328	0.0312933	0.14031	-0.0131485	0.261163	0.0145883	0.523878	0.0353492	0.12997	0.00205603	0.883754	-0.0134105	0.386789	-0.00809334	0.636989	-0.0433445	0.0922963	-0.0228457	0.198711	0.0161793	0.327638	-0.000245828
rs111342015	0.00513174	0.862602	0.0146437	0.683612	-0.000587051	0.987308	-0.00484783	0.896855	0.0427236	0.153692	0.0214987	0.513996	-0.00138429	0.966258	-0.0025511	0.932162	0.00280115	0.923697	-0.0139701	0.687397	0.0569938	0.0655715	0.00699996	0.800728	0.0423127	0.153716	-0.00323601	0.931278	-0.0386476	0.244337	-0.00935702	0.610119	-0.0104497	0.770812	-0.0484279	0.186046	0.0214917	0.330163	-0.0190299	0.432971	-0.017629	0.512103	-0.0284586	0.481095	-0.000107215	0.996931	-0.00762323	0.768678	-0.00288837
rs111599092	-0.00478955	0.877472	0.0132061	0.72536	0.0123752	0.748427	0.0294159	0.451657	0.0106469	0.734022	-0.0160018	0.642436	0.0367354	0.283352	0.00542618	0.862599	-0.00761181	0.803519	0.00463935	0.898379	-0.00357513	0.912091	0.0310097	0.285747	0.0644208	0.0378768	-0.0436979	0.265284	-0.025368	0.464523	-0.025098	0.191684	-0.00953214	0.799494	-0.00611572	0.873122	-0.000788735	0.972724	-0.0382544	0.131848	-0.00116367	0.967009	0.0247722	0.55784	-0.0230217	0.429857	0.0175261	0.518037	-0.00172273
rs11168951	0.0849028	0.0123948	0.101336	0.0138887	0.123681	0.00341322	0.114277	0.00769891	0.05822	0.0901457	0.0657267	0.0816226	0.0392094	0.296117	-0.000667444	0.984493	0.0771972	0.0212636	0.0840682	0.0344738	0.0340692	0.336885	0.0143348	0.652096	0.0224645	0.509177	-0.0372312	0.386583	0.100083	0.00841758	-0.00389054	0.853164	-0.0194862	0.635727	-0.0218708	0.602118	-0.0354442	0.161522	-0.0264615	0.341908	-0.0368755	0.231439	0.0512158	0.268896	0.0263867	0.408746	-0.047374	0.110816	-0.0190009
rs112780312	-0.00256801	0.896709	0.03624	0.130848	0.0542205	0.0276346	-0.00986688	0.692865	0.0101716	0.611018	0.0238774	0.277754	-0.00675204	0.757117	-0.0021036	0.916272	-0.00188555	0.923063	-0.0069831	0.763145	0.0139379	0.499999	0.00480655	0.795204	0.00410263	0.835955	0.0448983	0.0733019	0.00232205	0.916574	0.0269437	0.0276894	0.0133465	0.57735	-0.0336287	0.168803	-0.00434836	0.768058	0.0155071	0.338574	0.0108947	0.544097	-0.00832783	0.757306	0.0160519	0.388414	0.0191125	0.269316	0.00136647
rs113714691	-0.0466262	0.109577	-0.0152084	0.666721	0.0117705	0.745536	-0.0194402	0.598337	-0.0420261	0.15364	-0.0284989	0.378914	0.0504197	0.11763	-0.0471773	0.10926	-0.0462651	0.107572	-0.0300619	0.378774	-0.00864326	0.776442	-0.0220087	0.419895	-0.0504125	0.0841762	-0.0457272	0.215571	-0.0110408	0.735537	0.0103383	0.566512	0.0409902	0.244922	0.0257402	0.474552	-0.00152072	0.944338	0.0639705	0.00733628	0.0418423	0.113481	0.00577942	0.884485	0.0560993	0.0405975	0.0121369	0.633903	0.0155507
rs11628208	0.00224017	0.898583	0.00745866	0.726602	-0.0146166	0.503706	0.0234522	0.289973	0.00416706	0.814656	-0.00228613	0.906778	-0.0102811	0.595793	-0.017528	0.323978	0.0166078	0.338091	-0.00789195	0.701217	0.00103936	0.954851	-0.00572552	0.727819	0.00253878	0.885354	0.00456397	0.837458	-0.0209597	0.287079	0.00368512	0.734773	-0.00875077	0.681131	0.00873458	0.68724	-0.00730465	0.576575	0.00847133	0.556438	0.00890685	0.576226	0.00358453	0.880901	0.0161077	0.329834	0.00234197	0.878863	0.00843128
rs11662271	0.00374805	0.830817	0.017609	0.407435	0.0186538	0.392603	-0.00344628	0.876257	0.0126631	0.47492	0.0151109	0.438142	0.0191361	0.322843	-0.00125002	0.943812	0.0104287	0.546819	-0.0094226	0.64658	0.0309641	0.0911226	-0.0127655	0.436576	0.0161094	0.359101	0.0546169	0.0138171	0.00933888	0.634829	-0.0116565	0.282926	-0.0240301	0.257439	-0.0171656	0.42798	-0.0309457	0.0177896	0.00446606	0.755822	-0.00590259	0.710644	-0.0182292	0.445501	-0.00342069	0.835737	-0.0119207	0.437079	-0.0100035
rs11678106	-0.0159403	0.368136	-0.0307932	0.151617	0.0075263	0.732777	-0.0282297	0.20621	-0.0124026	0.488427	-0.0217634	0.268928	-0.0305408	0.118115	-0.0101779	0.569739	-0.0274531	0.116011	-0.036388	0.0792614	-0.0248134	0.179698	0.00910092	0.582749	-0.0116517	0.51146	0.00487244	0.827764	-0.0305175	0.123893	-0.0184825	0.0917199	0.00285072	0.894235	-0.019843	0.364381	-0.0106719	0.418177	-0.0100253	0.489492	0.00982889	0.540808	-0.0128769	0.593543	0.01476	0.375473	0.0104345	0.500336	0.002712
rs11720236	0.0305928	0.185653	0.0279223	0.318404	0.00818978	0.7756	0.0727985	0.0125623	0.00255138	0.913027	0.0326256	0.203588	-0.0322801	0.204996	-0.0105785	0.650414	0.0105577	0.643158	0.0392332	0.146712	-0.00624163	0.795925	0.0162353	0.452917	0.0156524	0.499894	0.0562019	0.0548279	-0.00100315	0.969052	-0.00374499	0.793496	-0.0371816	0.18321	-0.0301488	0.290331	-0.021215	0.217957	0.0143885	0.447149	-0.0202782	0.333053	0.00966076	0.758642	0.0411506	0.0579989	-0.0361047	0.073774	-0.0124475
rs117431198	-0.0663841	0.191271	0.0170953	0.781365	-0.0735259	0.245175	0.0288957	0.651686	0.0349665	0.495892	0.00952423	0.866106	-0.0340961	0.543181	0.0462338	0.368367	-0.0439452	0.380893	-0.00949627	0.873254	0.00107149	0.983893	-0.0518815	0.275424	0.0254595	0.617208	0.0676128	0.292414	0.0650051	0.252709	0.0269606	0.391142	0.0116633	0.849564	0.0388586	0.536043	0.0148369	0.694529	0.0177414	0.669826	0.0372169	0.419593	0.0364557	0.598438	-0.0164597	0.730641	0.0708784	0.110747	-0.0313521
rs11759522	-0.000766977	0.96569	0.0163953	0.448107	-0.0123758	0.577326	0.00668795	0.766035	0.0092824	0.606603	0.00943395	0.634042	-0.0261458	0.183844	-0.0228939	0.204039	-0.00315054	0.857919	0.000807039	0.969172	0.0225888	0.225067	0.00980011	0.556931	-0.0057441	0.74757	0.0380742	0.0913505	0.0072139	0.717757	0.00833873	0.449818	-0.00428279	0.842666	-0.0104438	0.635603	0.00405525	0.759832	-0.00318023	0.827651	0.00614109	0.704237	-0.00631093	0.79498	0.0191228	0.254062	-0.00130345	0.933398	0.00429813
rs117793008	-0.00768164	0.837509	0.0100967	0.823944	0.0119549	0.797617	-0.00453133	0.923583	-0.00312902	0.934157	-0.0465736	0.263205	-0.00155901	0.96992	-0.00272684	0.942603	-0.017085	0.643754	-0.00928153	0.832342	-0.0189438	0.628363	-0.0163406	0.641247	-0.0396744	0.289786	0.11455	0.015581	0.0528761	0.206295	-0.00416277	0.857483	0.0524091	0.247325	-0.0234023	0.613008	0.0036256	0.896539	-0.00870523	0.776676	0.0259008	0.445949	-0.0234099	0.64643	-0.0185874	0.597755	0.0385205	0.239367	-0.00535586
rs11793831	-0.0151476	0.401322	-0.0270305	0.21685	-0.0258661	0.249586	0.00219481	0.923312	-0.015248	0.403404	-0.0271776	0.175516	0.0151262	0.447645	-0.0219163	0.230167	0.00734196	0.680199	-0.0113853	0.590197	-0.0127323	0.499825	-0.00970871	0.565513	0.0121082	0.503074	-0.00316445	0.889873	0.00467181	0.8174	-0.00185577	0.86805	-0.00404011	0.853327	0.0366821	0.099903	0.00441591	0.742799	0.00488608	0.741088	-0.00614722	0.707428	0.00760174	0.757211	-0.00771774	0.649658	-0.00343091	0.827949	0.00395467
rs11884495	-0.0239481	0.164731	-0.0266739	0.202317	-0.00165331	0.938615	-0.0341031	0.116594	-0.00081455	0.962731	-0.0138709	0.46934	-0.0332508	0.0804788	-0.0261918	0.133199	-0.0239818	0.158804	-0.0452353	0.0250987	-0.00810161	0.652917	-0.0082025	0.611265	0.00281447	0.870606	-0.0351165	0.107493	-0.0173658	0.369175	0.0106605	0.317658	0.00019608	0.99251	0.011818	0.579124	0.0130632	0.308518	0.0138021	0.328486	0.0255996	0.101825	0.0094587	0.687145	0.0128119	0.429775	0.0174483	0.247387	0.0163508
rs11896887	0.00859957	0.625013	0.022357	0.294894	0.0154798	0.479801	0.0109237	0.622845	0.024131	0.175056	0.0265359	0.174938	0.0350961	0.0707891	0.0195477	0.272224	0.00366832	0.832757	0.0207898	0.313206	0.00587177	0.749578	0.00771273	0.639815	-0.00320544	0.855914	0.0140154	0.529227	0.03643	0.0645336	3.32411e-08	0.999998	-0.0161017	0.449868	-0.0129036	0.55286	-0.0197278	0.132295	-0.00472003	0.743427	-0.0135364	0.396657	-0.0245235	0.306473	-0.018871	0.254479	-0.00684684	0.656521	-0.00598422
rs11970030	0.0287421	0.308813	0.00212991	0.950439	-0.0789901	0.0246745	0.0175628	0.622419	-0.0218392	0.444555	0.00438615	0.888953	0.00520763	0.867339	-0.0258521	0.365607	0.0200488	0.472268	0.0118365	0.720602	-0.0301186	0.307498	0.00706963	0.789169	0.00486976	0.863431	-0.00622214	0.861775	0.0138611	0.661351	-0.00504036	0.773066	0.0360808	0.29152	0.0852786	0.0145323	0.00361694	0.86358	0.026249	0.256766	-0.018299	0.475456	0.0107271	0.780437	0.00544759	0.837612	0.00478091	0.846649	0.000151299
rs12438326	0.0216624	0.222169	0.00900363	0.675864	0.0237535	0.282684	0.0244206	0.2757	0.0183312	0.30705	0.0175676	0.373197	-0.0209579	0.284969	0.0029913	0.867701	0.0312805	0.074173	0.0232844	0.262726	0.00742734	0.688847	-0.0279368	0.0926856	0.00114946	0.948456	0.017984	0.423794	-0.0132366	0.505982	0.00638816	0.560789	0.00454271	0.832643	0.00546287	0.80342	0.0168286	0.203116	0.00928383	0.523229	5.63193e-05	0.99721	0.0283768	0.240854	0.0225532	0.176885	-0.000975254	0.949926	0.00243539
rs12441495	0.0776861	0.00431586	-0.0367402	0.265965	-0.00351007	0.917536	0.0390313	0.255913	0.00727343	0.791655	0.0360249	0.234363	0.0457165	0.128575	0.0331147	0.229579	0.0182178	0.4979	0.0235198	0.46094	-0.0338499	0.234152	0.0493356	0.0532758	0.0230132	0.399625	0.0297907	0.387856	-0.00983278	0.747595	-0.0274764	0.102991	0.00165823	0.959893	-0.00303534	0.928118	-0.00197862	0.922273	-0.0060769	0.785336	-0.026333	0.286955	-0.0394581	0.287983	-0.00158442	0.950726	-0.00533917	0.822656	-0.00729325
rs12485060	0.00720003	0.682003	-0.00163391	0.938846	-0.0234925	0.282419	-0.0146608	0.508391	-0.016279	0.359149	0.00854544	0.661555	0.0247298	0.202062	-0.0116428	0.512273	0.00313964	0.856214	-0.0113074	0.582492	-0.0135913	0.45858	0.000702716	0.965903	-0.00381268	0.828459	-0.0143103	0.519711	0.0165454	0.400413	0.00839185	0.4403	0.0267679	0.207973	0.0634263	0.00343848	0.0191551	0.143144	0.0165928	0.248703	0.0186603	0.241551	-0.0295639	0.216647	0.0179188	0.278225	0.0123925	0.41966	0.0137312
rs12646225	-0.0114798	0.688499	0.0087474	0.801055	-0.0191105	0.59197	-0.0250377	0.488642	-0.043881	0.129708	-0.0175801	0.580847	-0.0232291	0.462646	-0.0315274	0.276536	-0.00879569	0.755726	-0.0164172	0.624656	-0.0259574	0.385659	-0.0265221	0.322648	-0.0434337	0.130073	-0.0286415	0.429499	-0.0182784	0.568492	0.00383378	0.828728	0.0145021	0.675606	0.0254132	0.472656	0.00705915	0.740811	0.0432862	0.0650714	0.0294557	0.25706	0.0102231	0.793424	0.021713	0.420452	0.00832193	0.739804	0.00720664
rs12707116	-0.00299273	0.860928	0.0355616	0.0855056	-0.00952155	0.653892	0.00565469	0.792929	0.005808	0.736481	-0.00525817	0.781599	-0.0132509	0.48173	0.0212586	0.217796	0.0150555	0.371321	-0.000443425	0.982325	-0.0236742	0.184271	0.00723051	0.650957	0.0311376	0.0685317	0.00497514	0.817682	-0.0220511	0.249226	-0.0128114	0.225523	-0.0302209	0.143263	0.00413351	0.84452	-0.0267636	0.0352284	-0.022933	0.100985	9.92839e-06	0.999488	-0.0151043	0.515913	-0.0362148	0.0239682	-0.0168558	0.258738	-0.0140988
rs12713315	0.000113003	0.995143	0.00919845	0.682572	0.0298583	0.195994	0.0316678	0.176793	-0.00702478	0.708353	-0.00215072	0.916929	0.0196988	0.336239	0.0125061	0.504981	0.0134039	0.463903	-0.0112474	0.604846	0.0159845	0.410088	0.0557903	0.00132166	0.00266047	0.88616	-0.000269884	0.990837	0.00981777	0.636433	-0.00897867	0.434441	-0.00605693	0.787358	-0.0177516	0.438625	-0.00595035	0.667228	-0.0184969	0.224119	-0.0221998	0.187165	0.0764013	0.0025012	-0.0402122	0.021147	-0.0117334	0.469419	0.00698537
rs12918191	0.0182851	0.376154	0.0333585	0.182718	-0.00824198	0.748507	-0.0193461	0.45756	0.0119031	0.568593	-0.00329478	0.885891	0.0141832	0.533846	-0.0164944	0.429671	0.0123831	0.543489	-0.000411218	0.986438	-0.00226354	0.916452	-0.0196494	0.3097	0.0021025	0.919126	-0.0145428	0.577979	0.035567	0.124007	0.00835206	0.513637	0.0101466	0.684795	0.0170391	0.50423	0.000629113	0.967353	0.0147889	0.382012	0.0175137	0.350043	0.00412624	0.883426	0.00340841	0.860733	-0.00533593	0.767701	-0.00524433
rs13062354	0.00435079	0.801152	-0.0248058	0.2362	0.035167	0.101697	-0.0112861	0.604214	0.00543483	0.755557	0.00923597	0.630437	-0.0337999	0.0759203	-0.0104694	0.548738	-0.00831241	0.625675	0.00193776	0.923671	0.000331859	0.98532	-0.0352296	0.0292428	-0.0111007	0.521136	0.00053348	0.980533	-0.0165484	0.394226	0.00966472	0.365958	0.0167379	0.423369	-0.0201793	0.344074	0.0203299	0.113595	0.021855	0.122292	0.0228696	0.144417	-0.00919789	0.695648	0.0182917	0.259987	0.00647071	0.668309	0.00397649
rs13107325	-0.0418269	0.330005	-0.0645761	0.214806	0.0463782	0.385995	0.0418767	0.44011	0.00333217	0.938817	-0.0140855	0.768118	0.0157707	0.739387	-0.0305106	0.482532	0.0021334	0.959889	0.00845426	0.866557	-0.0691681	0.122979	-0.046836	0.243944	-0.0895958	0.0376198	0.0338305	0.534661	-0.0243611	0.612579	0.0101969	0.701195	0.0293946	0.571692	-0.0389656	0.463039	0.0326972	0.307102	-0.00985343	0.779395	0.0611072	0.117081	-0.0193329	0.741117	0.0299929	0.457994	0.0045678	0.903294	0.00445917
rs13146981	0.00547734	0.751732	-0.00732089	0.727127	0.0505875	0.0189693	0.0349064	0.109745	-0.00211589	0.903707	0.0140844	0.463983	-0.0153679	0.42092	-0.000161107	0.992655	0.0291086	0.0880756	0.0170438	0.40039	-0.000564186	0.975119	0.00426272	0.792489	0.00457966	0.791668	-0.0319879	0.143471	-0.00176574	0.927346	-0.00512244	0.632599	-0.0251849	0.229137	-0.0359397	0.0931302	-0.013705	0.287419	-0.0184533	0.19283	-0.0182905	0.244002	-0.00936468	0.691145	-0.0123869	0.446653	-0.0208642	0.167791	-0.00640734
rs1318878	-0.01119	0.601871	0.0191335	0.462056	0.00110175	0.967073	-0.00812193	0.764033	-0.0373342	0.0850059	-0.0487154	0.0409321	0.0187842	0.427291	-0.0241747	0.264894	-0.0355398	0.0928956	-0.0316626	0.207529	-0.0178149	0.426527	0.0129245	0.51996	-0.00514715	0.810729	0.00554422	0.838259	0.00764648	0.750718	0.00264301	0.842175	-0.0140879	0.587521	-0.0205599	0.437632	0.0138569	0.385513	-0.0102488	0.559632	0.00164481	0.932639	0.00333893	0.908993	-0.0101121	0.616135	0.0222246	0.23582	0.0137093
rs13262595	-0.00205672	0.905331	-0.0312136	0.136344	-0.00469363	0.827311	0.00640992	0.768676	0.00540867	0.756915	-0.0064017	0.738991	0.0101378	0.595196	0.00771694	0.658885	-0.0167576	0.325846	0.0184085	0.363146	-0.00426137	0.813405	0.00672157	0.67788	-0.00273249	0.874624	0.0204813	0.348744	-0.0173828	0.370135	0.0124944	0.242986	0.012007	0.566045	0.0254772	0.232785	0.0276756	0.0313841	0.00488375	0.730152	0.0141626	0.366514	0.0143486	0.542375	0.0146067	0.368993	0.0183829	0.223926	0.0132466
rs13278931	-0.00764165	0.652826	-0.0106732	0.60423	-0.0157518	0.455891	0.0297222	0.165062	-0.00809805	0.637058	-0.00580144	0.7586	-0.0106226	0.570742	0.00808712	0.637572	0.00839873	0.616369	0.0200055	0.31441	-0.0143202	0.419281	0.00133644	0.932998	0.0109428	0.519728	-0.0194305	0.365918	-0.0274878	0.148704	0.000621364	0.952869	0.0237398	0.248118	0.0162786	0.437512	0.00603746	0.632845	0.00227161	0.870258	0.000802169	0.958486	0.00690258	0.765356	-0.00821205	0.607048	-0.00325131	0.82678	0.00622277
rs13425585	0.00497687	0.775273	-0.0228241	0.28085	0.00713197	0.742364	-0.0295633	0.178662	0.00361687	0.837355	-0.00717805	0.711065	-0.0256978	0.181281	0.00730612	0.678553	-0.00996475	0.56237	0.00545512	0.789338	-0.0303631	0.0952693	0.0153577	0.346583	-0.0264597	0.129593	-0.000417544	0.984891	-0.0255895	0.189621	-0.00135658	0.899937	0.0193078	0.360822	-0.020261	0.346714	0.0132433	0.307401	-0.000476711	0.973364	0.0015144	0.923731	-0.00675305	0.775979	-0.0155539	0.342833	0.00707842	0.642414	0.00536654
rs13428598	0.0167942	0.342753	0.015206	0.478913	0.0140621	0.523359	0.013156	0.555706	0.0266544	0.136355	0.0404466	0.0397995	0.0267598	0.17108	0.0311711	0.0817543	0.0073289	0.674938	0.00538847	0.795033	0.00524354	0.776755	0.00852704	0.606871	0.0116856	0.50989	-0.00229638	0.918381	0.0255417	0.197898	-0.0135197	0.217136	-0.0222988	0.298278	-0.0228199	0.296708	-0.0178863	0.174645	-0.01746	0.228572	-0.0213944	0.182898	-0.0274604	0.255186	-0.011025	0.508137	-0.0226851	0.142953	-0.0111901
rs1343700	0.00193551	0.914142	-0.0305741	0.160085	0.0187534	0.401386	-0.0352743	0.119772	-0.000540851	0.976227	0.00692613	0.728691	-0.00331364	0.867151	0.0022601	0.900918	-0.009133	0.606145	-0.0264256	0.209229	-0.00653695	0.727296	-0.0163492	0.330346	-0.0513392	0.00425213	0.0124082	0.58532	0.0201001	0.316918	0.00546318	0.622895	0.0398954	0.0663045	0.00431006	0.845931	-0.00607488	0.649918	0.00862906	0.557363	0.0315234	0.0530611	-0.0240209	0.325885	0.0098373	0.560158	0.0236026	0.132677	0.00707415
rs1343775	-0.00139729	0.945608	0.0247015	0.320058	0.00869873	0.732961	0.0343911	0.182993	-0.0127114	0.539498	-0.000187946	0.993416	0.00401094	0.859174	-0.0158198	0.445386	0.00479391	0.812624	0.0344657	0.150745	-0.00729704	0.73311	0.0065241	0.733848	-0.028968	0.157731	0.0115622	0.655392	0.000852666	0.970345	0.00222725	0.860514	-0.0144067	0.561316	-0.0223493	0.377084	-0.00622808	0.682886	0.0307379	0.0670383	0.0189959	0.306865	-0.0318974	0.25296	0.0110858	0.565354	0.0125965	0.482179	0.00428171
rs1363119	0.00975335	0.581585	0.0332526	0.120847	0.0131204	0.551308	-0.0153818	0.490425	0.0152109	0.394881	-0.00759352	0.699454	-0.0228197	0.243097	0.00637186	0.721756	-0.0177824	0.308343	-0.0199205	0.336191	-0.00708602	0.701386	0.0197342	0.233427	0.00299424	0.865741	0.0445727	0.0461895	-0.00792062	0.689817	-0.0113574	0.299757	0.00512211	0.810863	-0.031584	0.148382	0.00475418	0.718001	-0.0134075	0.354707	0.0116022	0.469928	-0.00339112	0.888254	-0.022863	0.169478	0.0125998	0.415409	-0.00232561
rs1408579	0.03006	0.0807847	0.0185872	0.373355	0.0544003	0.0110734	0.0205106	0.345365	0.00411199	0.813228	-0.000937205	0.960933	0.000114407	0.995195	0.0131692	0.449412	0.00814006	0.631741	0.0129111	0.521903	0.00712628	0.692047	-0.00071526	0.964614	-0.0199298	0.247666	0.0160573	0.460996	-0.0164916	0.393287	-0.00328256	0.758044	0.0173914	0.404086	0.000368795	0.986162	0.00892661	0.486555	-0.002975	0.832925	0.00803046	0.60714	0.0084701	0.717961	-0.017839	0.27064	0.0103774	0.490553	0.0117721
rs1428472	0.0147373	0.422715	-0.00500638	0.822118	0.00367288	0.872376	0.0223615	0.334983	0.00977032	0.599252	0.0281982	0.167416	0.0184333	0.363158	0.0251209	0.176645	0.0115353	0.524539	0.032038	0.136838	-0.00395962	0.836621	-0.00185854	0.914042	-0.0096967	0.598329	0.0372076	0.109447	0.00595229	0.772341	0.000638595	0.955236	-0.000433147	0.984455	0.00997774	0.66015	-0.00776444	0.570597	-0.00304373	0.839901	-0.0116026	0.486557	0.0226363	0.365637	-0.0167337	0.333264	-0.00341815	0.831514	0.00181457
rs1473634	-0.012057	0.519575	0.0100785	0.657544	-0.0243093	0.2968	-0.0290365	0.218612	0.00498425	0.792183	-0.0101805	0.624553	0.0132345	0.521826	-0.014081	0.457042	-0.0268822	0.145537	-0.0110275	0.614846	-0.018868	0.334829	-0.0226549	0.195803	0.0270298	0.150144	0.0278668	0.239224	0.0140104	0.503818	-5.47109e-05	0.996233	0.0213754	0.346272	0.00231854	0.920142	0.0221052	0.11253	0.00406692	0.790769	0.000198439	0.990676	-0.0122351	0.631425	-0.00373799	0.831914	0.0139318	0.394759	0.00917855
rs1541102	0.00336497	0.851195	-0.0280793	0.196752	-0.0240895	0.280648	-0.0353599	0.117935	0.00105982	0.953398	-0.0148961	0.455371	0.00489251	0.804834	-0.00535258	0.768097	-0.0221336	0.211313	-0.0333421	0.112769	-0.0305977	0.102473	0.00198265	0.905985	0.000201079	0.991073	-0.049107	0.0303279	0.0207114	0.303251	-0.00804019	0.468876	0.00840024	0.698911	0.0103513	0.640448	3.24112e-05	0.998063	-0.010346	0.481388	0.00607144	0.709366	0.0184012	0.451497	-0.0124758	0.459969	0.0140914	0.369258	-0.00274109
rs1699462	-0.0428977	0.0143052	-0.0437798	0.039389	-0.0198141	0.36342	-0.00742229	0.737169	-0.0185175	0.295694	-0.021169	0.276964	0.0347547	0.0723341	-0.0189594	0.284666	-0.00870859	0.614432	-0.00561808	0.784225	0.000238132	0.989624	-0.0188996	0.248747	0.0210642	0.229833	0.0370347	0.0949658	0.00863984	0.660316	0.0203319	0.0607031	0.0120861	0.568992	0.0351042	0.104671	0.00862655	0.508685	0.00983802	0.492968	0.0150284	0.344432	0.0286555	0.230072	0.0174309	0.290285	0.00449236	0.769362	0.00553245
rs1702877	0.0105082	0.577182	-0.00169293	0.940925	0.0406066	0.0832343	0.015819	0.505609	0.0217444	0.253488	0.0218446	0.296863	-0.0289425	0.164245	0.0150459	0.429939	0.0311957	0.093311	0.0320328	0.146474	0.00838858	0.669879	-0.00259317	0.88311	0.0191048	0.311561	-8.22973e-06	0.999724	-0.00478648	0.820924	-0.00754795	0.517579	-0.0521733	0.0221046	-0.0512821	0.0274913	-0.0274414	0.0503461	-0.0194574	0.207294	0.0029513	0.862937	0.00523128	0.838631	-0.000711806	0.967979	-0.0175893	0.285736	-0.0141772
rs17032400	0.00619618	0.719532	-0.0196113	0.348205	0.013112	0.541486	-0.0195702	0.3686	0.0182991	0.294035	0.0225621	0.23913	-0.00255662	0.89318	0.0105758	0.544282	7.77445e-05	0.996358	-0.00434116	0.829816	-0.000884934	0.960864	-0.0124956	0.439095	0.0293141	0.0897541	0.0124386	0.568823	0.00155574	0.93583	-0.00196449	0.854044	0.011307	0.58799	-0.0172622	0.417981	-0.00397605	0.756956	6.84211e-05	0.996137	-0.00869447	0.578447	0.00776054	0.741238	0.00209025	0.897487	0.00346916	0.818237	-0.00397739
rs17251689	0.0355421	0.118599	-0.0296625	0.283383	-0.0329844	0.243993	0.0155369	0.588504	-0.0370249	0.107558	-0.0395869	0.11751	-0.00762798	0.761198	-0.0258449	0.261405	-0.00726262	0.746295	0.0268952	0.312723	-0.0100567	0.672176	0.0200192	0.347122	-0.0197007	0.387094	0.021122	0.462789	-0.02498	0.328577	-0.00411194	0.770508	-0.0183695	0.505774	0.0274272	0.329021	-0.00209918	0.90144	0.0257445	0.167323	0.0158568	0.442502	0.0328724	0.288654	0.0236224	0.269781	0.00809837	0.683967	0.00690769
rs17420654	0.00848769	0.649021	-0.00350424	0.876856	0.0178907	0.441191	-0.0300672	0.201069	-0.015514	0.410622	-0.0314377	0.129419	0.0191426	0.352336	-0.00869922	0.644699	0.000260278	0.988718	-0.03399	0.119776	-0.00740791	0.703819	0.0181738	0.297792	0.0106602	0.568462	0.0231119	0.327469	0.0154953	0.45835	0.00318314	0.782701	0.0214718	0.341529	0.0153951	0.504285	0.0222152	0.109468	0.0025026	0.869895	0.00991935	0.557853	-0.0256636	0.31242	0.00225745	0.897636	0.0218136	0.181103	0.0118855
rs17589603	0.0101624	0.716156	-0.0480479	0.156252	-0.0110887	0.749989	-0.016639	0.637574	-0.0274474	0.331533	-0.0167152	0.590752	-0.0198805	0.519555	-0.0253558	0.370069	-0.00520465	0.85054	-0.00853263	0.794543	-0.00798501	0.784572	-0.0635358	0.0152103	-0.017234	0.538178	0.0275469	0.436478	-0.0259562	0.407426	0.00305876	0.859635	-0.0237208	0.483262	-0.0233081	0.499745	-0.0128415	0.537885	-0.000486949	0.983039	0.000792458	0.975086	0.0758129	0.0465754	0.00905247	0.73083	-0.00463573	0.849803	-0.0144681
rs17663165	0.00597514	0.731911	0.014193	0.502182	-0.00081646	0.970002	0.0387733	0.0781475	0.00642175	0.71564	0.0243672	0.208725	0.0173654	0.366984	-0.00394763	0.822878	0.00622846	0.717381	0.0382728	0.0609254	-0.0182768	0.315907	0.0272053	0.0955575	-0.0177228	0.310338	-0.00568906	0.796493	-0.0301447	0.12265	0.00897024	0.405925	-0.0242472	0.250781	0.0264649	0.219329	0.00622166	0.63207	0.0140309	0.325939	0.00388307	0.806169	0.0518773	0.0289682	0.0321757	0.0497642	0.00369605	0.808505	0.00350147
rs1787003	-0.0250902	0.153616	-0.0184494	0.386846	0.0102866	0.638245	-0.0219959	0.321578	-0.0155738	0.380905	-0.0195983	0.316046	-0.0255592	0.187984	-0.00399554	0.822212	0.00393389	0.820599	-0.010156	0.62192	0.00312075	0.865047	-0.01209	0.462657	-0.0294005	0.0947242	-0.0107704	0.62857	-0.0502471	0.0107875	0.0183641	0.0914801	0.00665412	0.754568	-0.0201386	0.353689	3.20268e-05	0.998049	0.00850638	0.554777	0.00383992	0.809843	-0.00731201	0.760294	0.00704078	0.670333	-0.00317368	0.836456	0.000598746
rs179994	-0.0202173	0.252406	0.0040165	0.851163	0.0348721	0.112448	-0.0213778	0.336966	0.026105	0.143439	-0.00452608	0.817592	-0.0378223	0.0522158	0.000818396	0.963443	0.000917516	0.958002	-0.0199206	0.335414	0.00403363	0.826944	0.0106178	0.520473	0.0270264	0.126554	-0.0260602	0.243812	-0.0277428	0.161749	-0.000139771	0.9898	-0.0160555	0.452443	-0.0242215	0.266675	0.0158217	0.228569	-0.0198094	0.170644	0.00523011	0.744055	-0.0443206	0.0653425	-0.0428801	0.00979677	0.0120098	0.436692	0.0125543
rs1892423	0.0148802	0.396864	0.0348336	0.101726	0.0279121	0.201485	0.0192958	0.384041	0.0199904	0.260289	0.0290845	0.136208	-0.0334754	0.0840589	0.0328914	0.0639976	0.000482809	0.977768	0.00899587	0.661982	0.0157796	0.389833	-0.0115653	0.481815	-0.0128849	0.464388	0.0114647	0.606206	0.0713387	0.000288041	0.0144085	0.184934	0.00368804	0.862232	-0.013989	0.518946	-0.0133346	0.308093	0.0120169	0.40367	-0.00713745	0.65424	-0.0279494	0.242641	0.0121367	0.462575	-0.00110704	0.942524	-0.00815389
rs1895471	0.00577513	0.75925	-0.0015584	0.945619	-0.0254858	0.277372	0.0358468	0.131757	0.011017	0.56325	-0.000669988	0.974499	-0.0053526	0.79707	-0.00736554	0.699284	0.0286067	0.124094	0.0394233	0.0741732	0.0341337	0.0828712	-0.0122139	0.488833	0.0173724	0.357332	0.0431217	0.0709292	0.0507179	0.0164588	-0.00395365	0.734595	-0.00680904	0.765296	-0.0161652	0.487576	-0.0197204	0.160075	-0.0126648	0.412191	-0.00869317	0.611391	-0.0246326	0.337696	-0.00151619	0.931875	-0.0195373	0.236031	-0.00906576
rs1953522	-0.0110569	0.530763	0.0327164	0.126201	0.0140037	0.523643	0.0235458	0.290892	0.011822	0.50731	0.00464216	0.812797	0.0354316	0.0687301	0.00463373	0.795006	0.0150641	0.386696	0.000118681	0.995416	0.0124208	0.500096	0.00356291	0.829074	0.0210907	0.232518	-0.0313935	0.159966	0.0028541	0.885178	-0.0148514	0.173628	-0.0370856	0.0824731	-0.0194513	0.37209	-0.0254757	0.0528077	-0.025561	0.0768086	-0.0198601	0.214512	-0.0208305	0.386071	-0.00973318	0.557384	-0.0235825	0.126222	-0.00456725
rs2007481	0.000910005	0.960028	0.0358214	0.10362	0.0332605	0.141128	-0.0032613	0.886831	0.0198657	0.279322	0.0348282	0.0843443	0.0146233	0.465565	0.0231355	0.207667	0.00422875	0.813406	-3.47473e-05	0.998697	-0.00830411	0.661474	0.0116917	0.491648	0.0171016	0.346609	-0.0218129	0.342685	-0.0156899	0.440526	-0.0107013	0.340889	-0.0142797	0.51582	-0.0209932	0.349381	-0.0285299	0.0348565	-0.000544753	0.970798	-0.0189977	0.248831	0.0170165	0.491514	0.00565684	0.740508	-0.0188482	0.235165	-0.0103832
rs2077610	0.0203731	0.24145	0.0176986	0.401224	-0.0333718	0.122997	0.00951417	0.664392	-0.00501462	0.775446	0.0056489	0.77003	0.0187732	0.327895	0.0176232	0.316399	0.0134181	0.434092	0.0257124	0.206535	-0.00717841	0.692669	0.0240431	0.13956	0.0177684	0.30757	0.00502531	0.819298	0.0217391	0.264942	-0.0107959	0.315873	0.0124464	0.554308	-0.0279255	0.193491	0.000699665	0.95689	-0.00288477	0.839513	-0.00425683	0.787267	0.00594514	0.801825	-0.0137109	0.402044	-0.0122916	0.418808	-0.00749887
rs2239647	0.0104293	0.538302	0.0372235	0.069878	0.00953913	0.650943	0.0104437	0.6251	0.0279335	0.102815	0.0192518	0.307042	-0.00693634	0.710708	0.00502781	0.769215	0.0310767	0.0629526	0.0321642	0.104967	0.00970813	0.583536	-0.00472183	0.765739	0.024222	0.153449	-0.0514829	0.016259	0.0153364	0.419768	0.00256502	0.806802	-0.0188642	0.357546	0.00305716	0.883841	-0.00123532	0.921992	-0.00112082	0.935628	0.00228091	0.882155	-0.0076576	0.740097	0.0179069	0.261216	-0.0194085	0.190124	-0.0115122
rs2284871	-0.0179568	0.326203	0.027109	0.221305	0.00439834	0.846759	-0.0190235	0.409786	-0.0115581	0.531815	-0.00869408	0.668852	0.00462744	0.81892	-0.00234749	0.898996	-0.0133718	0.458606	-0.038336	0.0734792	-0.00782315	0.682117	0.00508866	0.766232	-0.0234609	0.200284	0.00651084	0.77867	-0.0178202	0.384328	-0.0100155	0.376247	-0.00823894	0.709663	-0.00126555	0.95532	0.0106552	0.434082	-0.00846874	0.571828	-0.00727196	0.6612	-0.0315451	0.206069	-0.0202351	0.239443	0.00560345	0.726023	0.00591139
rs2333604	0.0255513	0.148114	0.01372	0.521817	0.0383921	0.0803758	0.0586674	0.00842113	2.56242e-05	0.998854	0.00993781	0.612429	0.021076	0.279381	0.00298437	0.867216	0.020943	0.228963	0.0324385	0.116424	0.0148064	0.422163	0.0218338	0.185972	0.00535229	0.762005	0.0365511	0.101762	0.0284445	0.149561	-0.00660234	0.545995	-0.0069097	0.746592	-0.00880974	0.686077	-0.0207514	0.114456	-0.0295275	0.041017	-0.0234314	0.143348	-0.0438687	0.0681075	-0.0322136	0.0522908	-0.00828102	0.591483	-0.0124298
rs2388334	-0.009377	0.583715	-0.00270381	0.896387	0.0352243	0.0981685	-0.0192518	0.372656	-0.00163847	0.924526	0.0125512	0.509397	0.0255361	0.176271	0.0146889	0.396096	0.00187798	0.911463	-0.0180811	0.36707	0.0155286	0.384921	0.00637813	0.690359	0.00876739	0.608754	0.0444155	0.0402814	0.0152329	0.427192	-0.0265621	0.0120998	-0.0236746	0.253324	-0.0512081	0.0153937	0.000520486	0.967428	-0.0159482	0.255092	-0.0165548	0.286383	-0.0528202	0.0234133	-0.0378802	0.0185961	-0.00512143	0.732238	-0.00453537
rs2420551	0.0358475	0.262871	0.0213685	0.581943	-0.0553042	0.165388	0.0435045	0.280924	-0.00273243	0.932745	-0.021686	0.542567	0.0629831	0.0747897	0.0200335	0.536425	0.00104909	0.97354	0.025287	0.500265	-0.00329733	0.921525	0.00947798	0.75188	-0.00843223	0.79277	0.041611	0.303837	-0.0331337	0.355225	0.0082878	0.67577	0.0216298	0.576688	0.0340677	0.389287	0.0104596	0.660519	0.0111881	0.669786	0.0284965	0.326961	-0.0269509	0.536878	0.0321231	0.286517	0.0329955	0.239117	0.012875
rs2425161	0.000741757	0.973598	0.0142157	0.600715	0.0342982	0.21875	-0.0293083	0.30039	0.0261835	0.247677	0.0420247	0.0915143	0.00519109	0.833856	0.0271256	0.231568	0.00936223	0.67203	-0.0600922	0.0220374	0.0163625	0.484486	-0.00056238	0.97861	0.00223816	0.92051	0.022726	0.423745	-0.03519	0.16149	-0.0182479	0.188252	-0.0133909	0.621416	-0.00720088	0.794758	-0.00345533	0.836129	-0.00163506	0.929019	-0.0168762	0.406539	0.0249332	0.414371	-0.0208212	0.323543	-0.00178359	0.92749	0.00573604
rs2426132	-0.0152454	0.382803	-0.00755923	0.721361	-0.0110444	0.611421	0.0300149	0.172966	-0.00757322	0.668038	0.0135154	0.486341	-0.0277213	0.150858	-0.0207087	0.241096	0.00529271	0.758817	0.0140725	0.491472	-0.0046595	0.798524	0.00448099	0.784087	-0.0145208	0.406381	0.0298039	0.177935	-0.0265695	0.174579	-0.00558839	0.60521	-0.0206111	0.329991	-0.0124181	0.564911	-0.0252294	0.052256	0.0013721	0.923613	0.00939366	0.55338	-0.0294805	0.21588	0.0180734	0.271386	-0.0168187	0.270916	-0.00546633
rs2457192	-0.0349297	0.0833733	-0.0377639	0.122867	-0.0389105	0.121484	-0.0390238	0.125325	-0.0190097	0.35151	-0.0305163	0.173832	0.00644284	0.772534	-0.0270927	0.184342	-0.0170982	0.390741	-0.011223	0.635104	-0.0319018	0.130213	-0.00175625	0.925929	-0.0174242	0.388879	-0.0195908	0.443093	-0.0447686	0.0475871	0.00414812	0.739748	0.0344768	0.158271	0.0302927	0.224498	0.00720085	0.631836	-0.00499988	0.762354	-0.00186303	0.918998	0.0259277	0.345966	-0.0171126	0.367382	-0.00605309	0.731733	-0.00139351
rs2478295	0.0153274	0.42625	0.00706904	0.762269	0.00442772	0.853539	0.0311647	0.199719	0.0100267	0.606929	0.0424092	0.0476202	0.0505919	0.0173535	0.00991878	0.610711	0.0366127	0.0540972	0.0239216	0.288981	-0.000400969	0.984105	-0.0177026	0.326443	0.018874	0.327703	0.00412475	0.865739	0.0057613	0.789717	-0.00424525	0.721789	-0.00308278	0.894871	-0.0167501	0.481635	-0.0184253	0.19895	-0.0190376	0.227984	-0.0159849	0.360523	-0.069497	0.00809997	-0.00210282	0.907634	-0.01567	0.352402	-0.0133381
rs2726513	-0.0342069	0.0487985	1.44554e-05	0.999452	0.0140586	0.515205	-0.0126613	0.563671	-0.014587	0.406104	-0.0181388	0.347205	0.0311529	0.103918	-0.00375745	0.830528	0.00654054	0.70266	-0.00681624	0.73751	-0.0213008	0.240426	0.026579	0.1019	-0.00316215	0.855897	-0.00834008	0.70413	-0.00449311	0.81711	0.00739562	0.491336	0.0221653	0.29184	-0.0141957	0.50792	0.0121421	0.348138	0.00922111	0.516924	0.00150157	0.92406	0.00177591	0.940146	0.00633321	0.698143	0.00534735	0.724732	0.00452593
rs2765042	0.0150037	0.406708	-0.00711874	0.74544	0.0216074	0.336758	0.0101493	0.656162	-0.0125009	0.493694	-0.0127834	0.524535	0.00892708	0.654445	-0.00682687	0.708936	-0.00855173	0.631498	0.0217845	0.303246	-0.00270803	0.88592	-0.00998205	0.555004	-0.0179661	0.320877	0.032293	0.158101	-0.000388378	0.984717	-0.00914146	0.414015	0.0260924	0.233219	-0.0122052	0.584595	0.0224326	0.0953983	0.0112709	0.446318	0.0103772	0.52685	0.0143971	0.558679	0.0229436	0.177375	0.0216421	0.170781	0.00259203
rs2819336	0.0379214	0.0319994	0.0123126	0.566045	0.0131637	0.549991	0.0373486	0.0944007	0.0143165	0.423621	0.0235072	0.231989	0.0400101	0.0405296	0.022303	0.212553	0.0343424	0.0491524	0.0240854	0.245098	0.0177921	0.335719	0.0290394	0.0796092	0.0254149	0.151438	0.000455704	0.983772	0.0170731	0.389802	-0.000301295	0.978043	-0.0218548	0.307527	0.0127241	0.560442	-0.0132869	0.313428	-0.0184591	0.202916	-0.0115608	0.471502	0.0245115	0.309452	-0.0121069	0.466953	-0.0195418	0.206632	-0.0162868
rs28549862	-0.00674262	0.732132	0.0286929	0.229003	-0.00218986	0.928774	-0.00378572	0.878962	0.0154001	0.439079	0.0227344	0.298634	0.0193369	0.373459	0.0122757	0.537278	0.0488332	0.011855	0.00649414	0.778071	0.0166146	0.419315	0.0384623	0.0368518	0.0269777	0.171993	0.000549837	0.982423	0.00678993	0.758144	-0.0245917	0.0436117	-0.0400694	0.0923944	0.0221969	0.361264	-0.0173074	0.238117	-0.028354	0.0786807	-0.0247681	0.165379	-0.02035	0.447981	-0.010731	0.562051	-0.0486041	0.00470808	-0.0142268
rs28612284	-0.158449	0.022436	0.0295544	0.72467	-0.0226641	0.792516	-0.139928	0.109621	-0.00708605	0.919623	-0.0486878	0.526861	-0.0426424	0.576536	-0.0160331	0.818794	-0.0947781	0.165389	-0.127876	0.114704	-0.0932474	0.198435	0.0083758	0.897459	-0.125888	0.0700093	-0.0599011	0.496472	-0.00100637	0.98965	0.0258999	0.546657	-0.0550951	0.510703	0.114353	0.181088	-0.00517889	0.920099	0.0140755	0.804627	0.079485	0.205645	-0.0260753	0.782054	0.0308701	0.635338	0.0505379	0.403988	-0.000321462
rs28657585	-0.0064531	0.805426	-0.00309785	0.922323	0.0380041	0.243971	0.0465068	0.159757	-0.0549952	0.0378434	-0.0460967	0.113479	-0.00790993	0.784534	-0.0481612	0.0691065	-0.0288865	0.263937	0.0154812	0.61401	0.00692246	0.800397	-0.00870301	0.722617	0.0289284	0.270266	0.0383641	0.247362	-0.0215079	0.463191	0.00957575	0.554748	0.0324741	0.30585	-8.96611e-06	0.999779	-0.00234628	0.904359	0.00562234	0.793389	0.0261218	0.271938	-0.0237346	0.50627	0.0161815	0.511531	0.0276056	0.228353	0.00820143
rs28892332	-0.0466611	0.284636	-0.0594859	0.260805	-0.0467335	0.39027	-0.0361745	0.511756	-0.0831674	0.0592071	-0.0752521	0.120831	-0.0024319	0.959657	-0.060977	0.166986	-0.040948	0.341258	-0.0478724	0.348908	-0.0986545	0.0302819	-0.121726	0.00285256	-0.0647406	0.137393	-0.00302597	0.956304	-0.0635253	0.193425	0.0151866	0.57366	0.0243867	0.644266	0.0289003	0.592443	0.0303946	0.350277	0.0418546	0.241372	0.0486586	0.219185	0.0651549	0.272197	0.0482827	0.239447	0.0379058	0.320206	-0.000235608
rs2906455	0.0149303	0.591785	-0.0184768	0.584119	-0.0182001	0.59962	0.0327076	0.35184	-0.00666277	0.812976	-0.00032275	0.991683	0.0544121	0.0767029	0.0080555	0.77489	0.00671242	0.807101	0.0326886	0.316411	-0.00917102	0.752608	0.00426649	0.869972	-0.0196313	0.481601	0.0415684	0.238274	-0.0248712	0.426485	0.00962864	0.576285	-0.00736948	0.826892	0.015575	0.650813	-0.0309277	0.135768	-0.0148001	0.516611	0.0160296	0.525945	0.0271164	0.4749	-0.00804047	0.758932	-0.0140523	0.564099	-0.0024706
rs3092073	-0.0157577	0.357424	0.000827393	0.968233	0.00279495	0.895679	-0.0347643	0.107555	-0.0317124	0.066836	-0.0191437	0.314613	-0.0192648	0.308047	-0.0193583	0.263893	-0.0241313	0.153314	-0.0201342	0.315476	-0.00976334	0.585396	-0.0210722	0.18845	-0.0141777	0.408487	0.0275315	0.204219	0.000773474	0.967841	0.008078	0.445876	0.0360298	0.082291	0.0109776	0.603824	0.0251732	0.0483205	0.0197895	0.158151	0.0059283	0.702871	0.0277959	0.233456	0.0107265	0.505725	0.0289459	0.0532558	0.017001
rs34172651	0.00151979	0.936158	-0.0143514	0.533158	0.0191815	0.41678	-0.0120456	0.614742	-0.0163769	0.393198	-0.0134402	0.524159	0.000438885	0.983279	0.00926128	0.629678	0.0061167	0.743861	-0.00164739	0.940901	0.00730936	0.712231	0.00555116	0.754721	0.000415032	0.982581	-0.0083378	0.728363	-0.016791	0.4306	-0.0177292	0.13101	-0.0140204	0.541959	-0.0260556	0.266386	-0.0235392	0.0955644	-0.015934	0.305251	-0.0280111	0.103861	-0.00637806	0.805111	-0.000928986	0.958531	-0.0171064	0.302479	-0.0150377
rs34180096	-0.00386761	0.828279	-0.0400914	0.0637471	0.00736298	0.740115	0.00658592	0.769736	0.00513043	0.775991	-0.0151077	0.445805	0.00687265	0.726787	-0.0203404	0.259247	-0.00719929	0.682361	0.00903468	0.665212	0.0145141	0.436114	-0.0168841	0.311787	-0.0101053	0.571713	-0.0316626	0.160566	-0.0150305	0.452234	0.012824	0.245129	0.0128376	0.552157	0.0287552	0.191767	0.0123418	0.352653	-0.005955	0.683567	-0.00400904	0.804263	0.0138523	0.568313	0.0117548	0.483374	0.00802937	0.606551	0.00833837
rs34305371	0.0131684	0.68325	-0.0544178	0.164094	-0.00765442	0.848879	-0.0190261	0.640185	-0.0248588	0.446251	0.00135525	0.969866	0.0147125	0.679664	-0.0241293	0.459509	-0.0465901	0.143407	-0.0377159	0.318133	-0.0577476	0.0867302	0.0181702	0.547484	-0.0313302	0.332077	0.0120295	0.768709	-0.0317746	0.37896	0.0033532	0.866671	-0.0123265	0.752247	0.00933628	0.814848	0.0154458	0.520252	-0.00965318	0.715107	-0.0172259	0.556396	-0.0493128	0.262156	-0.00645226	0.831616	0.031559	0.263452	0.0154293
rs34627	-0.0234017	0.171912	-0.0502302	0.0156215	-0.0791698	0.000204185	0.0162161	0.452968	-0.0308509	0.0752557	-0.0436917	0.0218116	-0.0179583	0.34237	-0.00655399	0.705381	-0.0129156	0.445001	0.0205642	0.305544	-0.034574	0.0534337	-0.00130223	0.935372	-0.0453804	0.00815418	-0.00272703	0.89989	-0.0189031	0.325278	0.00448085	0.672577	0.0261143	0.208147	0.0561888	0.0079429	0.000372001	0.976731	0.0134421	0.338876	0.0248327	0.110348	0.0059508	0.798819	-0.00582149	0.718081	0.00573739	0.701859	0.00209196
rs34811474	0.00972995	0.72954	0.0359035	0.293062	0.0381757	0.275786	0.0688894	0.0523551	0.0353551	0.213935	0.0929334	0.00295662	-0.00115806	0.970271	0.0584732	0.0399049	0.029756	0.28391	0.0483018	0.142744	0.0426407	0.147035	0.0388732	0.139866	0.0398567	0.157088	-0.0726144	0.0415564	0.0212033	0.501378	-0.0191093	0.272517	-0.0297865	0.382252	-0.0970458	0.00522681	-0.01404	0.50298	0.0158775	0.490986	-0.0323141	0.205737	-0.0199722	0.602566	0.0165231	0.532598	-0.0408702	0.0967374	-0.0198946
rs35891966	0.0640621	0.186062	-0.0688104	0.242292	-0.026482	0.660625	0.0621393	0.312067	-0.0238238	0.626801	-0.034201	0.525505	-0.000412011	0.993877	-0.00858202	0.860989	0.0177789	0.709896	0.0346006	0.542092	-0.0471728	0.351409	-0.0155764	0.731034	-0.0215223	0.656873	-0.0329593	0.592741	-0.0167718	0.757188	-0.00427942	0.886514	0.065086	0.267923	0.0159495	0.789908	0.00601396	0.868352	0.00295233	0.940724	0.0186642	0.671261	-0.0937792	0.156964	-0.0508544	0.264557	0.018728	0.658389	0.0123017
rs36004779	-0.000430607	0.985431	-0.0227339	0.42562	-0.0396323	0.17634	-0.00821024	0.782221	-0.024661	0.300201	-0.0278604	0.287196	0.0182381	0.48272	0.0168875	0.478182	0.0118951	0.608889	-0.00645284	0.815043	-0.0104724	0.670177	0.00815643	0.711329	-0.00391309	0.868261	0.001424	0.961869	-0.0187785	0.47614	0.00305123	0.834389	0.0128427	0.652116	0.0223244	0.442885	0.00998706	0.568871	0.0200786	0.297895	0.0189525	0.375141	-0.0220781	0.491209	-0.0365768	0.0985917	0.00535226	0.795046	0.000437055
rs36162392	0.0284501	0.309408	0.0767457	0.023683	-0.000840964	0.980744	0.0397027	0.260434	0.0116753	0.679826	0.0141057	0.650373	0.00606126	0.844445	-0.0141217	0.617855	0.0599743	0.0298017	0.0111581	0.733593	0.0283079	0.332966	-0.0265393	0.310782	0.0438541	0.118315	-0.0187806	0.595729	0.0227293	0.468123	-0.0238474	0.168564	-0.038548	0.255159	0.00445658	0.897455	-0.0264947	0.203221	-0.0273845	0.232203	-0.022503	0.37573	0.00730196	0.84814	-0.00458695	0.861698	-0.0444899	0.0690025	-0.0147638
rs3817334	0.0601844	0.000634092	-0.0131111	0.539302	-0.00103419	0.96239	0.00740191	0.739291	0.038598	0.0302333	0.0370156	0.0587157	0.027991	0.150199	0.0199466	0.263139	0.0194112	0.264312	0.0108192	0.600115	0.0363395	0.0483083	0.0294731	0.0738962	0.0128889	0.465304	-0.0109528	0.623538	0.0086575	0.661769	-0.00855484	0.432958	-0.00649856	0.760536	0.0397589	0.0677018	-0.0160642	0.221016	-0.0232521	0.107219	-0.0239172	0.13463	-0.00532837	0.824424	-0.0304889	0.0658985	-0.0142429	0.355418	-0.00683591
rs3850610	0.0188214	0.331208	-0.0169554	0.47047	0.0338843	0.159961	-0.0031629	0.89705	-0.00170507	0.930658	0.00612202	0.776207	0.0195389	0.360967	0.00876389	0.654825	0.0230372	0.228196	-0.00852002	0.707305	0.0458063	0.0235714	-0.00630637	0.728084	0.0111605	0.565113	0.0346054	0.158366	0.0208569	0.336919	-0.00956562	0.424892	0.00115399	0.960758	0.0118228	0.62134	-0.00706767	0.624224	-0.00462383	0.770887	-0.000658934	0.970102	0.0219472	0.405815	-0.0193819	0.287772	-0.0027575	0.87073	-0.00536774
rs3914453	0.0123636	0.475557	-0.00121321	0.953929	0.0129134	0.549498	-0.0216127	0.32307	-0.00289978	0.86846	-0.003194	0.868307	-0.00535523	0.779374	-0.00403334	0.817895	-0.0183439	0.283392	-0.0278191	0.170312	-0.000630501	0.972227	-0.0107009	0.509291	0.00526145	0.761765	0.0188058	0.391231	-0.0315345	0.103984	4.38312e-06	0.999674	0.0101244	0.62913	2.25352e-05	0.99916	0.0151279	0.241223	0.0101576	0.474015	0.000888275	0.954953	0.0110295	0.640202	-0.00880113	0.589081	0.0280334	0.0643104	0.00757197
rs39302	0.015556	0.479615	0.0399863	0.133685	0.0187914	0.492404	-0.0147042	0.595979	0.0435559	0.0500004	0.0282694	0.247556	-0.00386164	0.873595	0.0340543	0.125753	0.0374499	0.0843444	0.0228733	0.374576	0.0171526	0.455202	0.00943661	0.646677	0.000395333	0.985679	-0.0287974	0.300591	0.00576324	0.815231	-0.00726892	0.593511	-0.0233619	0.380153	0.00510831	0.850857	-0.017713	0.279169	0.00281949	0.875613	-0.0187526	0.347426	0.0248299	0.407239	0.00108739	0.95809	-0.0238308	0.215291	-0.00247675
rs407102	-0.0061731	0.757745	-0.0305162	0.208611	0.00331205	0.894256	-0.0127571	0.613046	-0.0113576	0.574447	-0.0317871	0.152931	-0.00794486	0.718954	-0.00896226	0.657827	-0.0156108	0.42917	-0.00364399	0.876431	-0.0311361	0.136699	-0.0252927	0.176806	0.00490612	0.806684	-0.0304601	0.229168	-0.0265208	0.237261	0.00739433	0.550499	0.0358521	0.138918	0.0184863	0.454734	-0.00357874	0.810043	0.0199431	0.223646	0.0191488	0.291583	0.00580389	0.831352	0.0149867	0.425872	0.0192904	0.270294	0.00429946
rs421211	-0.0132802	0.435393	0.00485611	0.813884	0.0117379	0.579502	0.0195668	0.362263	-0.0202712	0.23901	-0.0198694	0.29357	0.0078933	0.674414	-0.0202058	0.240273	-0.0232874	0.165437	0.00277163	0.889397	-0.00556504	0.754387	-0.00780527	0.624352	0.00185997	0.913155	0.0301541	0.161962	0.0143806	0.451057	0.00603205	0.567006	0.0482162	0.0191647	0.0257143	0.221258	0.0136762	0.280621	0.0224043	0.108242	0.0278991	0.0707813	-0.0110727	0.633063	0.0329958	0.0392057	0.0302685	0.0419037	0.00957924
rs424029	-0.0509083	0.276299	-0.0161991	0.774735	0.0202479	0.727587	-0.0493543	0.402272	0.00710005	0.880616	0.0530884	0.306428	-0.0145923	0.777338	0.0488242	0.301203	-0.00865549	0.851035	-0.0190328	0.727879	0.00988617	0.839652	0.0776496	0.0760249	0.0831374	0.0761913	-0.0946178	0.109857	-0.0579221	0.267623	-0.0289977	0.316339	-0.0483708	0.391971	-0.0283805	0.622755	0.00607084	0.861435	-0.0267086	0.485646	-0.0295562	0.485497	-0.0336594	0.597185	-0.0488434	0.266168	-0.00084265	0.983542	-0.0101053
rs4294650	-0.020849	0.265153	-0.00731375	0.747361	0.0110035	0.636659	0.00303264	0.897884	-0.0461326	0.0147034	-0.0328791	0.113915	-0.00163882	0.936744	-0.022189	0.24091	-0.0116632	0.5277	-0.00897872	0.682077	-0.0152826	0.434192	-0.00253095	0.885109	-0.0469491	0.0121759	-0.0158812	0.502838	-0.0195581	0.350902	0.0107827	0.351757	0.00663447	0.769751	-0.0203717	0.378207	0.00589613	0.672477	0.0194435	0.204604	0.0153931	0.364659	-0.00705674	0.781896	0.00304209	0.862782	0.0143621	0.380229	0.00546987
rs4636654	0.0111183	0.530213	0.0150819	0.482346	0.00164039	0.940685	-0.0267706	0.230833	0.0177461	0.321262	-0.000707425	0.971328	-0.00225441	0.908261	-0.0111288	0.534308	-0.00101145	0.953862	-0.0178666	0.38892	0.0163043	0.378222	-0.000315951	0.984796	0.025861	0.144641	0.02919	0.192967	0.0347881	0.0801395	-0.00716619	0.513289	0.00220104	0.918202	0.00864481	0.692763	0.00610435	0.643449	-0.0157734	0.276592	-0.0112211	0.484908	-0.0541977	0.0247653	-0.0125923	0.449669	0.00336348	0.828138	-0.00101301
rs4690029	-0.00590865	0.729713	-0.0091237	0.659904	0.0139893	0.511183	-0.00162547	0.939973	0.0112767	0.514268	-0.0110818	0.55988	-0.00593705	0.753185	0.0135119	0.434849	-0.0132458	0.432453	0.00338138	0.86596	-0.00320208	0.857705	0.00218333	0.891538	-0.00614638	0.719706	-0.0400876	0.0642159	0.000263879	0.989031	0.00900721	0.394711	-0.00846181	0.682676	-0.0205229	0.331462	0.000613592	0.961587	-0.0100571	0.472856	0.00224118	0.885156	0.0204102	0.381155	-0.00283216	0.860319	0.00959143	0.521287	-0.00552325
rs4720476	0.03085	0.0877711	0.0362078	0.0984002	0.0465056	0.0385542	0.0193848	0.395285	-0.0111805	0.540683	-0.012814	0.52333	0.046273	0.0202365	-0.0187317	0.305276	0.0201576	0.257989	0.023261	0.27168	0.0186556	0.323554	-0.00832677	0.622324	0.0439916	0.0150726	-0.0117365	0.608052	0.0329542	0.103248	0.010916	0.329057	0.00702122	0.74824	0.015098	0.498675	0.00167784	0.900796	0.0209517	0.157074	0.00700404	0.669138	-0.00246609	0.920176	0.034325	0.0433749	0.00331816	0.833607	-0.00280773
rs4781499	0.0427579	0.0731775	-0.0141856	0.62392	-0.0372491	0.209842	0.0110319	0.714606	-0.00419585	0.862223	-0.0250311	0.345551	0.0342442	0.193501	0.00453431	0.85109	-0.0239748	0.308662	0.0182755	0.513285	-0.000502168	0.983955	-0.0262488	0.24079	-0.0262925	0.271761	0.0685609	0.023258	-0.00212894	0.936645	0.020425	0.166703	0.0213491	0.459806	0.0255311	0.386506	-0.00141208	0.936791	0.0224222	0.252368	0.0365762	0.0912843	0.0338377	0.297944	0.0032172	0.886134	0.0201946	0.33327	0.00635281
rs4852252	0.0221309	0.20758	0.0192583	0.365636	0.0340355	0.119293	0.0313037	0.157958	0.00411476	0.816699	-0.00489458	0.802015	-0.0109522	0.571959	0.0101319	0.56829	-0.0142168	0.41192	0.0417051	0.0426017	0.00848829	0.643544	0.000850498	0.958714	0.0241764	0.168836	0.0264425	0.234111	0.000801196	0.967556	-0.0128222	0.238069	-0.00134252	0.949631	-0.051807	0.0168658	0.0120179	0.358429	-0.00818752	0.569219	0.00224716	0.887854	0.0132402	0.579917	-0.00763693	0.643826	0.00596783	0.69756	0.00472084
rs4925114	0.0215931	0.232718	0.00618383	0.777828	-0.0116632	0.604288	0.00109397	0.961756	0.0262263	0.151376	0.0442083	0.0277758	0.0309933	0.120427	0.0193883	0.288984	0.0294742	0.0985785	-0.00287068	0.892178	0.00279156	0.882568	0.0170226	0.31482	0.0271546	0.133895	0.00493881	0.829184	-0.0219636	0.279038	-0.0136915	0.221438	-0.00419325	0.848016	-0.0191066	0.392309	-0.00074577	0.955833	-0.0188336	0.203578	-0.00632683	0.69976	-0.023871	0.332596	-0.0197872	0.244653	-0.0198667	0.209068	-0.00880428
rs516902	-0.0153826	0.378857	0.00958029	0.651104	-0.00358943	0.868963	-0.0308351	0.162127	0.00478043	0.786818	-0.0307708	0.113185	-0.0145643	0.450035	-3.76321e-05	0.998302	-0.0416261	0.015751	-0.0240286	0.2404	-0.0107604	0.555867	-0.0198712	0.224445	-0.0147492	0.399681	-0.0125188	0.571408	-0.00552425	0.778256	0.00454743	0.674233	-0.00408109	0.846983	-0.00353639	0.869912	0.0196521	0.131152	0.0155367	0.278005	0.0147864	0.351158	0.0419334	0.0780372	-0.00210165	0.898312	0.0269237	0.0780928	0.0104662
rs527825	-0.000146906	0.99322	0.0299427	0.153247	0.0211177	0.326393	-0.0365474	0.0936768	0.00227186	0.89659	0.0113846	0.553529	0.0435385	0.022493	0.0263987	0.131088	-0.0147004	0.388823	-0.0203368	0.315087	-0.00645489	0.720798	0.00607996	0.707142	0.0249092	0.150152	-0.0115398	0.597817	0.0349361	0.0714759	-0.000847321	0.936872	-0.0211265	0.312831	-0.00812246	0.703712	-0.0147218	0.252646	-0.0156335	0.269661	-0.0103534	0.509221	-0.0335994	0.153774	-0.0194928	0.230727	-0.00121337	0.936036	-0.00443733
rs55985762	-0.0734804	0.000786596	-0.0451839	0.088766	-0.0100183	0.713418	-0.0459825	0.0961753	-0.0529588	0.0167302	-0.0401565	0.0990783	-0.0282067	0.243482	-0.0443021	0.0455429	-0.0488436	0.0237671	-0.0512882	0.0454473	-0.0366236	0.10938	-0.0250998	0.220731	-0.0300274	0.170776	-0.0332953	0.229845	-0.0520174	0.0338446	0.012622	0.351732	-0.0043774	0.868841	-0.00451727	0.867484	0.0302513	0.0636637	0.0165252	0.35703	0.0206151	0.299682	-0.0149075	0.617543	0.0290581	0.158588	0.0308496	0.107195	0.0203354
rs56150095	-0.0528475	0.0024348	-0.0126092	0.551141	-0.0225694	0.298638	-0.0382959	0.0818592	-0.0125036	0.478517	-0.00984201	0.611877	-0.0228363	0.235954	-0.0117327	0.506101	-0.0335859	0.050955	-0.0373046	0.0678411	-0.0215762	0.236526	-0.00143128	0.930183	-0.0105038	0.547884	0.0342161	0.121278	0.0217775	0.265073	0.0196711	0.068381	0.0361912	0.0865267	0.0348227	0.106102	0.0102773	0.428927	0.00904961	0.52674	0.0128269	0.417889	3.77806e-05	0.998733	-0.00692226	0.673208	0.0303127	0.0468434	0.0117446
rs56151722	0.0114152	0.581927	0.0204027	0.416991	0.0333145	0.196751	0.055768	0.0332628	0.0330253	0.115507	0.0371322	0.107272	-0.0264203	0.248851	0.0203382	0.332292	0.0370692	0.0699822	0.0622874	0.0102971	0.0270445	0.212072	0.0434512	0.0252892	0.00207036	0.920621	-0.00641709	0.807108	-0.049652	0.0330612	-0.0013889	0.913803	-0.0346998	0.166701	-0.0246505	0.335881	-0.0237291	0.1249	-0.0121795	0.473849	-0.0218625	0.245427	-0.00597948	0.832568	0.000139724	0.994287	-0.0321832	0.0758894	-0.0122457
rs5758605	0.00203195	0.909936	0.00441529	0.839485	-0.0160795	0.472102	-0.0157441	0.486587	-0.0119878	0.509175	-0.000718893	0.971296	0.0105679	0.594177	0.0219613	0.226916	-0.00374556	0.832685	0.01173	0.577171	-0.00228089	0.903191	0.000974089	0.953821	0.00463695	0.796649	0.00145978	0.948779	-0.0123065	0.541181	0.0109947	0.322613	-0.0316015	0.146392	0.00135176	0.951435	-0.00703251	0.598516	-0.00414328	0.778281	0.0077095	0.636414	-0.0276207	0.259235	-0.00676785	0.688936	-0.0143271	0.361859	-0.0105906
rs59663815	-0.00826253	0.677031	-0.0349601	0.146119	0.0072499	0.768945	0.00368069	0.883076	-0.00503292	0.801955	0.0229233	0.298286	-0.00773469	0.723662	0.0144845	0.470046	-0.0155731	0.42585	-0.0481689	0.0379947	-0.0235459	0.255993	-0.0130972	0.480813	-0.0177603	0.371281	0.0212289	0.39729	0.0295767	0.183838	0.00398496	0.745484	0.0197301	0.411338	-0.0374729	0.125996	-0.00528752	0.720367	0.00385434	0.812619	-0.0015921	0.92949	0.0536874	0.0467331	-0.0240457	0.197257	0.00171064	0.921383	0.00581939
rs61104616	-0.00662411	0.700151	-0.00891811	0.669012	-0.000506426	0.98113	0.00636253	0.769439	-0.00950104	0.58508	0.00812706	0.670907	0.00239155	0.899803	0.00187483	0.914203	0.00930035	0.583729	-0.00843265	0.675659	0.00682048	0.704379	0.00313832	0.845547	0.0113468	0.510119	-0.00634755	0.770705	-0.00835745	0.664876	-0.0137659	0.195885	-0.0408275	0.0498836	0.00300631	0.887498	-0.00425911	0.739559	-0.00978311	0.487805	-0.0115012	0.46135	-0.0403545	0.0851547	-0.023938	0.139107	-0.0216881	0.149319	-0.00124992
rs6124077	-0.0339927	0.069405	-0.0278623	0.220092	0.00161012	0.944919	-0.00465065	0.843937	0.0209592	0.267936	-0.0125924	0.545089	-0.0237786	0.250088	-0.0128429	0.497736	0.0032372	0.860971	0.00889129	0.685121	0.0252371	0.196767	-0.00774962	0.658243	0.0149859	0.424138	-0.0117736	0.619125	-0.0283455	0.177402	0.0407271	0.00043557	0.0540356	0.0171739	0.0383412	0.097327	0.0180729	0.194866	0.0131882	0.389659	0.020277	0.232574	0.0205811	0.419998	0.00921992	0.600753	0.0220747	0.177756	0.0152462
rs61544985	0.0396137	0.0217748	-0.00658161	0.753397	0.0275317	0.200315	0.0296379	0.173684	0.0361562	0.038322	0.0338656	0.0777834	0.0239504	0.209179	0.0169335	0.332455	0.0243286	0.153502	0.0341779	0.0911078	0.0159097	0.377817	0.0166573	0.302903	0.0248506	0.151313	-0.00337596	0.877289	0.00925008	0.632946	-0.00577368	0.589099	-0.041195	0.0488105	-0.00654409	0.759091	0.00622923	0.628093	-0.0153015	0.279425	-0.00716942	0.647458	0.000616217	0.979119	-0.00970478	0.550422	-0.00799008	0.596919	-0.00367473
rs62037363	0.00498137	0.780644	-0.0418407	0.053517	0.00812316	0.715155	0.0366184	0.104682	0.011963	0.50821	0.0214614	0.2802	0.0341637	0.0835241	0.00720668	0.690275	0.000571953	0.974163	0.0231439	0.269086	0.0268133	0.151044	0.00118582	0.943524	-0.0167528	0.350015	-0.0120443	0.595047	0.00569251	0.77632	0.00172106	0.876452	-0.00167101	0.938449	-0.0112215	0.611482	0.00187753	0.887925	0.0011906	0.935235	-0.00890851	0.582956	-0.00318864	0.895912	-0.00163386	0.922628	-0.00446679	0.775336	-0.00271266
rs62047280	0.047745	0.0302468	0.0159545	0.550572	0.0383893	0.161942	0.0229543	0.409645	0.0484478	0.0300846	0.0411525	0.0931661	0.0105053	0.665862	0.0468939	0.0354788	0.0538548	0.0132621	0.0443769	0.0856746	0.0122268	0.595544	0.0535084	0.00955952	0.0650477	0.00322688	-0.0221599	0.42735	0.00372118	0.880249	-0.0155097	0.255489	-0.0256776	0.335877	-0.0740791	0.00652307	-0.0211098	0.198858	-0.0364732	0.0438996	-0.0465969	0.019848	-0.0517377	0.0848403	-0.041117	0.0474604	-0.0230346	0.232146	-0.0123895
rs62236533	0.0476837	0.151167	0.00342634	0.932158	-0.0341909	0.408194	-0.0178716	0.669497	0.0531977	0.11287	0.0768882	0.037181	0.0659681	0.0718437	0.0865717	0.00989351	-0.00368279	0.910515	-0.00155266	0.96815	0.0321555	0.354259	-0.0448975	0.14847	-0.00446388	0.89322	0.0151544	0.719061	0.0380112	0.306411	-0.0179989	0.38134	0.0110673	0.782975	0.0038076	0.926063	0.00103808	0.966494	-0.0241811	0.373865	-0.00703496	0.815385	-0.103874	0.0216421	-0.0130082	0.677035	0.0113453	0.696048	-0.0154405
rs62253086	-0.10597	0.000771483	0.018549	0.62739	0.0236686	0.546461	-0.0666836	0.0935198	-0.0234138	0.462683	0.0560461	0.109796	-0.0161869	0.642444	0.00219406	0.945151	-0.0153642	0.621473	-0.0236385	0.522121	-0.0228283	0.488209	0.0389864	0.186732	0.0127414	0.68662	-0.0710667	0.0749011	-0.0439954	0.212256	-0.0102166	0.60064	-0.0506128	0.184554	-0.0533351	0.170872	-0.0212482	0.365302	-0.0174812	0.498591	-0.0267656	0.349582	-0.0156637	0.715881	-0.0200037	0.500086	-0.0123303	0.654795	-0.0119792
rs62358087	0.00295371	0.893658	-0.0132963	0.619736	-0.00816515	0.766548	0.0287849	0.30153	0.0114015	0.609736	0.0311799	0.204265	0.043856	0.0720069	-0.00119305	0.957453	0.0368039	0.0913686	0.00903527	0.726985	0.0166406	0.470879	0.00450278	0.827654	0.0293458	0.185308	0.0202507	0.468811	0.0131225	0.595864	3.50001e-05	0.997958	-0.0117152	0.661415	-0.0182521	0.503681	-0.0328402	0.0457715	-0.0219017	0.226203	-0.0134093	0.503655	-0.0370636	0.218099	-0.0126021	0.544609	-0.0273787	0.156496	-0.0151058
rs62439690	0.00123188	0.950298	-0.00991247	0.679155	-0.00299625	0.903066	0.0467186	0.0610013	-0.0193911	0.331769	-0.00882578	0.687937	-0.00648062	0.766543	0.010028	0.6162	0.0063052	0.74649	0.0334719	0.148224	-0.0472239	0.0221961	0.0233741	0.206733	-0.0250584	0.205978	0.00978858	0.695591	-0.0330411	0.136315	0.00303766	0.803851	0.0209638	0.380878	-0.00406279	0.867848	-0.00880221	0.549889	0.00714465	0.659001	0.00830491	0.643369	-0.0191462	0.477317	0.0106655	0.566553	-0.0129927	0.452261	-0.000923041
rs66886492	0.0175837	0.530831	0.0719462	0.0343838	0.00623941	0.858229	0.029842	0.398761	-0.00056252	0.984173	0.00484802	0.876528	0.00669159	0.829004	-0.0144991	0.609316	0.0381873	0.16791	-0.00313746	0.923938	0.0462794	0.114209	-0.0259785	0.322424	0.0292898	0.298326	0.0167365	0.637166	0.0127176	0.685759	-0.025097	0.148285	-0.0391346	0.249141	-0.0244252	0.481067	-0.0200828	0.335964	-0.0299183	0.192828	-0.0232675	0.360967	0.0284073	0.457594	-0.0128393	0.626596	-0.0408437	0.0960651	-0.00988375
rs6760964	-0.0196877	0.255669	-0.0642425	0.00221871	-0.0106667	0.620558	-0.0277654	0.203129	0.00480238	0.783761	0.0115114	0.549704	-0.00398992	0.834837	0.0128573	0.462657	-0.013788	0.419751	-0.0174122	0.390497	-0.0331194	0.0671055	-0.017316	0.285173	-0.00862623	0.618969	0.010981	0.616153	0.0175494	0.366319	0.00211979	0.843244	0.00815854	0.697329	-0.00257971	0.903982	0.00362464	0.778353	0.00281223	0.842797	-0.00217971	0.889645	-0.0176832	0.454071	-0.00874678	0.591151	0.00556867	0.713116	0.000412907
rs6778735	-0.0226114	0.195914	0.0150344	0.478155	-0.0273848	0.20809	0.0226933	0.30377	-0.0217746	0.217955	-0.0299723	0.122983	-0.0224286	0.245231	-0.0161381	0.361247	-0.0224395	0.193279	0.0270732	0.186061	0.00269585	0.882715	-0.0268458	0.100895	-0.0323858	0.0646894	-0.0177299	0.423153	-0.0237834	0.225892	0.0250239	0.0207047	0.00281543	0.894158	0.0395888	0.066678	0.00128596	0.921354	0.0183734	0.199522	0.009514	0.54873	0.000340848	0.988587	0.0387121	0.0185078	0.00567628	0.710433	-0.000409092
rs6819372	0.00862296	0.611026	0.000689798	0.973233	-0.0127595	0.545744	0.0305863	0.152885	-0.00135473	0.937054	0.0177442	0.346459	-0.00298426	0.873401	0.0109235	0.524199	-0.00588329	0.725059	0.0136232	0.492802	-0.0121866	0.491613	-0.00711043	0.65421	0.00538649	0.75119	0.0381643	0.0753587	0.0221783	0.243334	0.012004	0.252553	0.0356721	0.0821259	0.00326759	0.876124	-0.0102014	0.419276	-0.00276074	0.842567	0.0191713	0.212717	0.061717	0.00756447	0.00792173	0.61951	0.0138378	0.350598	0.00459544
rs7010173	-0.00843235	0.634007	-0.0202403	0.346232	-0.00508415	0.817671	-0.0335222	0.133316	-0.0109978	0.539235	-0.00929147	0.63712	-0.0178757	0.360697	-0.00989606	0.580907	-0.00284722	0.87063	-0.0193569	0.350885	-0.0197987	0.2848	-8.02466e-05	0.996138	-0.0239326	0.177758	0.0558265	0.0126744	0.0146746	0.460258	0.0137169	0.210737	0.0240128	0.262963	0.0245833	0.261325	0.0293424	0.0259679	0.0156465	0.281019	-6.37415e-06	0.999684	0.00679527	0.778347	-0.00462377	0.781547	0.0176226	0.25535	0.0123214
rs7038525	0.00723208	0.74366	-0.0112648	0.674472	-0.0328279	0.232942	-0.0143741	0.606611	0.00316923	0.887277	-0.00621876	0.800294	-0.013492	0.58032	0.00899794	0.687474	0.0258903	0.235436	0.00209401	0.935566	-0.00309241	0.893515	-0.00697804	0.736017	0.0119628	0.589102	0.0713418	0.0108647	0.0100397	0.68514	-0.00350924	0.797643	-0.00505426	0.850272	-0.0130521	0.63279	-0.0151703	0.357162	-0.0143454	0.42844	0.000161174	0.993592	0.0642858	0.032768	0.0049922	0.810369	-0.0164757	0.394283	-0.0107296
rs704444	-0.0107311	0.535577	-0.00762299	0.7164	0.0204474	0.342417	0.0151169	0.488761	0.0244846	0.162172	0.0173856	0.366086	0.00208415	0.913069	0.0442733	0.0113801	0.00158622	0.925989	0.00473185	0.815426	0.0307164	0.0894444	0.0104503	0.519189	0.0265103	0.126031	5.96581e-05	0.997827	0.0121905	0.529752	0.00557106	0.603279	0.00418991	0.841474	-0.0374532	0.0796985	-0.00728024	0.57216	-0.0149769	0.291375	-0.0211878	0.177199	0.00875302	0.710314	-0.0165469	0.309385	0.000879484	0.953658	0.00436533
rs71413877	0.043456	0.421055	-0.119516	0.0689554	-0.0104492	0.876527	0.0635117	0.350883	-0.00129285	0.981107	0.0456573	0.447082	0.123511	0.038247	-0.0117984	0.829021	0.0403818	0.448798	0.104101	0.0999184	-7.6671e-05	0.998915	0.0190664	0.70609	0.0164571	0.761674	-0.0789103	0.247776	0.0753392	0.213722	0.0355354	0.2877	-0.0158864	0.808699	-0.0443125	0.506748	-0.0341199	0.395819	0.00291809	0.947408	-0.0276055	0.573359	0.00541796	0.941314	0.00712957	0.888425	-0.0395835	0.402183	-0.026917
rs7186834	0.0485078	0.00538321	0.0289454	0.170676	-0.00106959	0.960708	0.0266166	0.226142	0.00284716	0.871783	0.00431726	0.823836	0.0286749	0.136283	-0.0091156	0.605378	0.000814374	0.962252	0.0216818	0.288556	0.00668507	0.713642	-0.021253	0.193128	0.0101189	0.562543	0.040508	0.0665764	0.00354605	0.856094	-0.0127007	0.239206	-0.0137361	0.514921	-0.0216979	0.313921	-0.00138783	0.914855	0.00314806	0.825695	0.0165895	0.294655	-0.0228181	0.336898	0.00336651	0.837462	0.00856713	0.574261	-0.0027682
rs72801843	0.0129631	0.519514	0.00175789	0.942584	0.0230666	0.357616	-0.00796814	0.753831	-0.026605	0.191477	-0.0276063	0.217542	0.0255685	0.249728	-0.00130441	0.948933	0.00409132	0.836826	-0.0149919	0.525001	-0.0180865	0.389834	0.000158389	0.993298	-0.0341574	0.090031	0.0265346	0.297937	-0.00704064	0.755144	0.00684847	0.582429	0.0375074	0.123663	0.0173435	0.485868	0.00793148	0.596889	0.00598949	0.716705	0.0129331	0.479187	0.00136407	0.960328	-0.00782089	0.679719	0.0150807	0.391659	0.0104057
rs73189617	-0.0143228	0.460322	0.0251327	0.284877	-0.0231996	0.336298	-0.0104922	0.667884	-0.0259684	0.185077	-0.000462794	0.982867	-0.0113061	0.597288	-0.0288866	0.140603	-0.0211294	0.269335	-0.02558	0.259822	-0.0121256	0.54924	0.025929	0.152902	0.00771574	0.69099	0.00361198	0.882938	0.0172249	0.428233	-0.00856084	0.475801	-0.0154545	0.510092	0.00527124	0.825788	0.000918077	0.949283	0.00106539	0.946509	-0.00638036	0.716845	0.0380046	0.150193	0.000517028	0.977383	0.0038462	0.820537	-0.00163089
rs7365380	0.00817349	0.632089	0.0291237	0.159474	0.00775891	0.715031	0.0034377	0.873282	0.00404161	0.814926	0.0217954	0.250796	0.0211461	0.261995	-0.000779072	0.96401	0.0249939	0.137932	-0.0121243	0.544302	0.0485739	0.00644099	0.00109998	0.945126	0.0109855	0.520634	-0.0206394	0.339628	-0.00228024	0.905044	-0.0113612	0.282168	0.007255	0.725582	0.0143225	0.497082	-0.000537238	0.966315	0.0027132	0.846234	-0.0166126	0.283598	-0.00412511	0.859309	0.00769178	0.631979	-0.0126492	0.396961	-0.00306299
rs743134	0.0134487	0.443867	-0.00662511	0.755645	-0.00686108	0.753521	-0.0319894	0.148682	0.0042394	0.811169	-0.00363863	0.852074	0.00900907	0.64195	0.00572155	0.747276	-0.00600716	0.728799	-0.0318324	0.121497	-0.000930671	0.959527	-0.00544498	0.740292	0.0312583	0.0753342	0.00223002	0.92003	0.0374168	0.0572422	0.00387593	0.721421	0.00191264	0.928291	0.00147776	0.945673	0.00201698	0.877405	-0.00180806	0.89993	0.0120454	0.449512	-0.0134747	0.573157	0.000560489	0.972928	0.0126106	0.411476	-0.00447854
rs74370218	-0.020488	0.253121	-0.0112922	0.603449	-0.00578004	0.795756	-0.00584253	0.796106	0.00233133	0.897684	-0.015974	0.422881	-0.0268406	0.174896	-0.0102203	0.573063	-0.00935018	0.597326	-0.021102	0.314978	0.0157553	0.40029	-0.00950048	0.571344	0.00365874	0.838592	-0.0414065	0.0680226	0.0105232	0.600634	0.00449379	0.685477	0.00481184	0.824532	-0.00819424	0.711578	0.00415556	0.75551	0.0218085	0.137625	0.0174166	0.284413	0.0614958	0.0117733	0.0119466	0.478818	0.00737886	0.63809	0.00485572
rs74796574	-0.0114699	0.816467	0.116584	0.0509154	-0.0209314	0.732999	0.027461	0.658825	0.0712294	0.153187	-0.0135421	0.804869	-0.0642906	0.237163	0.00321186	0.948637	0.0204968	0.67356	0.00087089	0.987966	0.0234754	0.648524	0.000582384	0.989927	0.0138867	0.778235	-0.0668974	0.283376	0.0214627	0.698625	-0.0227985	0.455992	0.00335011	0.9552	-0.0268493	0.659282	-0.0460306	0.20981	-0.0447805	0.267801	-0.0341558	0.44526	-0.00336849	0.959986	-0.0497671	0.283193	-0.0176181	0.682856	-0.0154884
rs7487854	0.0631652	0.069263	0.0167403	0.692165	0.0333852	0.440763	0.095397	0.0296023	0.042467	0.227034	0.0950253	0.0139708	0.0744883	0.052245	0.0185136	0.598721	0.0459717	0.180845	0.0745586	0.0672389	-0.010956	0.762988	0.0186374	0.566988	-0.02618	0.452277	0.104469	0.0175149	0.0632666	0.104605	0.00545595	0.799879	-0.00373314	0.929527	-0.0658564	0.125422	-0.0413808	0.109925	0.00410398	0.885454	-0.031747	0.314599	-0.0681705	0.150151	0.015071	0.645122	-0.0176002	0.563267	-0.0208178
rs74944275	0.0166665	0.72715	-0.0648751	0.262205	-0.0703314	0.236536	0.125264	0.0373952	0.0121656	0.800923	0.0719644	0.175001	-0.0270273	0.60794	0.00770486	0.873189	0.044691	0.342879	0.0520994	0.351483	0.076236	0.126062	-0.0333067	0.455919	0.00725271	0.87928	0.0648106	0.284279	0.108543	0.0424368	0.00139332	0.962406	-0.0725289	0.209251	0.0233738	0.691861	-0.0931776	0.00869826	-0.0376753	0.335176	-0.0805272	0.0629734	-0.0397807	0.540719	0.0188763	0.674197	-0.0674837	0.106049	-0.043109
rs750472	0.0159242	0.359932	0.0463095	0.0279267	0.0359771	0.0962328	0.0269956	0.218339	0.00473166	0.787678	0.0198449	0.304392	0.00769667	0.688504	0.00542452	0.757565	0.017991	0.294395	0.0245094	0.228533	0.0337592	0.062773	-0.0142621	0.380676	0.0124214	0.475287	0.0331889	0.13099	0.0156252	0.422633	-0.0114949	0.285579	0.00894703	0.670617	-0.0285776	0.183125	0.0211917	0.101559	0.00655086	0.645394	-0.00260791	0.868687	-0.0146341	0.536899	0.00071072	0.965319	0.0116373	0.444134	0.00696984
rs7534501	-0.0383234	0.0262576	0.0136293	0.514963	-0.0156119	0.467175	-0.0130282	0.549685	-0.0148868	0.393591	-0.013199	0.49145	-0.0463381	0.0149768	-0.00468808	0.788245	-0.0268615	0.114748	-0.0189392	0.348653	-0.0306598	0.0890576	-0.00826366	0.608873	-0.0390569	0.0237905	-0.0114016	0.601912	-0.0102364	0.596497	0.000873342	0.934799	-0.0346824	0.0969115	-0.00830569	0.696733	-0.0062663	0.625896	-0.0207847	0.141535	-0.0213339	0.173079	0.023665	0.314297	-0.0193312	0.233736	-0.00586067	0.697859	0.00422211
rs7583067	0.0108787	0.60704	-0.0171623	0.503704	-0.0307139	0.243647	-0.0332502	0.21286	-8.30983e-05	0.996899	0.0101798	0.665021	0.0256723	0.271743	-0.00842425	0.693712	-0.00247067	0.905811	-0.00572271	0.817314	0.0230892	0.295894	0.0266091	0.178793	0.00465195	0.826257	-0.0121577	0.649888	0.0132712	0.575404	0.0136009	0.29878	-0.0087961	0.731383	0.0193038	0.460337	0.00902074	0.566936	-0.0101102	0.559471	-0.0187393	0.328839	0.071178	0.0135317	0.00648469	0.744492	-0.00791489	0.66887	0.00286198
rs7590388	-0.0279081	0.109343	-0.0290123	0.169801	0.0129335	0.551174	-0.0290625	0.186315	-0.0144898	0.410914	-0.0152614	0.43083	0.00629334	0.743601	4.63903e-05	0.9979	-0.0305186	0.0759067	-0.032258	0.114058	-0.0445736	0.014314	0.00161938	0.921031	-0.00434781	0.803216	0.00646513	0.769498	-0.0457106	0.0190014	0.0191544	0.0757658	0.0135456	0.520877	-0.00457061	0.831941	0.00470848	0.716812	0.014874	0.297543	0.0178623	0.258673	0.0314572	0.185282	0.0124727	0.446793	0.0182163	0.231986	0.00626939
rs7599488	0.0326567	0.057976	0.00970123	0.642155	0.00548817	0.797948	0.00144861	0.946878	0.0673632	0.000108434	0.0601463	0.00166641	0.024767	0.192459	0.0557792	0.00135426	0.0380637	0.0250312	0.0118975	0.555345	0.0455985	0.011268	0.0537161	0.000857834	0.0217056	0.208606	0.00686514	0.752851	0.00416505	0.829178	-0.0107452	0.313545	-0.0160633	0.440849	0.00848071	0.690193	-0.00594938	0.642909	-0.0336039	0.0172427	-0.0405396	0.00944893	0.00420094	0.85788	-0.0153976	0.341957	-0.0345899	0.021575	-0.0101958
rs7609050	0.0127375	0.458728	-0.0127475	0.541064	0.0247833	0.246828	0.0151291	0.485447	0.0182468	0.293953	-0.0154167	0.420001	-0.0014866	0.937575	-0.0129361	0.457111	-0.0122093	0.471751	0.0060967	0.762095	0.00498046	0.78157	-0.0161264	0.316402	0.00160379	0.925823	0.0188209	0.386551	0.00201389	0.916719	0.00855846	0.421132	-0.00177182	0.932185	-0.0379172	0.0741858	-0.0103038	0.420851	-0.00968533	0.491805	-0.0210196	0.177982	-0.010752	0.646307	0.00655551	0.685392	-0.00882293	0.557364	-0.004026
rs7618519	0.00736909	0.668903	-0.0448612	0.0317936	-0.0162345	0.449021	0.0108997	0.616237	-0.0206409	0.236022	-0.0174652	0.362094	0.0160981	0.396807	-0.00818032	0.638653	-0.0042164	0.804074	0.00765487	0.704411	-0.0125745	0.484714	-0.0237471	0.141396	-0.02082	0.227572	-0.00721742	0.74069	-0.0341843	0.0766703	-0.00201661	0.850011	0.00870375	0.676584	0.00180315	0.932486	-0.00386841	0.763128	-0.00291629	0.836324	0.000675225	0.965573	-0.0131465	0.575089	0.00183258	0.909956	0.00234873	0.876093	0.00190195
rs7633520	-0.0118217	0.541149	0.0261734	0.264329	-0.00130459	0.956772	0.00840078	0.730555	0.0188348	0.335097	-0.0160764	0.454439	-0.00747493	0.726064	-0.014149	0.469501	0.0158538	0.405969	0.0288963	0.201939	-0.00224845	0.911343	-0.0060848	0.736661	0.0280941	0.146557	-0.0155932	0.524407	-0.00427885	0.843499	0.0118758	0.321208	0.00631435	0.787372	0.0195227	0.413736	-0.00364464	0.800156	0.00156237	0.921402	0.0091956	0.600186	0.032829	0.2125	-0.00446956	0.80597	-0.00565382	0.738099	-0.00588564
rs7699872	0.0249436	0.175185	0.0361413	0.10523	0.0422614	0.0648157	0.0190236	0.412205	0.0304699	0.101235	0.00895819	0.661276	0.0381586	0.0600135	0.0139817	0.452209	0.0280106	0.122735	0.0236647	0.27192	0.0229876	0.231419	-0.00457771	0.790314	0.0312027	0.0902766	-0.00595452	0.798135	0.0198306	0.336507	-0.0103858	0.36173	-0.0257901	0.24691	-0.0135292	0.551521	0.00581208	0.671228	-0.0172904	0.251131	-0.00844631	0.612808	0.00418257	0.8674	-0.0131814	0.446108	-0.0137398	0.393039	-0.00917249
rs77482156	0.0756976	0.042548	0.112533	0.0129842	0.0976116	0.0356953	0.061207	0.193686	0.0835159	0.0268956	0.0966639	0.0198819	0.095396	0.0205733	0.0248552	0.510449	0.102051	0.00562647	0.0377844	0.387674	0.0708171	0.0692727	-0.0045746	0.895843	0.0607485	0.105309	0.0307983	0.514224	-0.0123263	0.767905	-0.0200979	0.38436	-0.0399879	0.376739	-0.0879768	0.0564824	-0.0221875	0.42474	-0.0378677	0.215701	-0.0346324	0.306935	0.0498386	0.327179	-0.0227731	0.516802	-0.0418811	0.199992	-0.0168811
rs7763264	0.0263862	0.135067	0.030319	0.157315	-0.0223251	0.309557	0.046908	0.03539	0.00681301	0.702648	0.0182198	0.353255	-0.00318528	0.870163	0.0196308	0.271641	0.0196544	0.259506	0.0134384	0.516153	0.00412713	0.822875	0.0128602	0.436733	0.0011193	0.949516	0.00493481	0.825247	0.0346347	0.0797023	-0.0121885	0.264692	-0.00992058	0.643041	-0.00216414	0.920946	-0.0108419	0.410126	0.00235177	0.870816	-0.00593782	0.71095	-0.00263081	0.912912	-0.000694833	0.966636	-0.0145069	0.347718	-0.000208874
rs78066960	-0.00636486	0.736384	0.0281098	0.220114	0.0187071	0.426399	-0.0072382	0.761897	0.0208502	0.275191	-0.0105662	0.614847	-0.0116152	0.577421	0.011603	0.543637	0.00130443	0.944219	-0.0209036	0.345014	0.00331401	0.866787	-0.0404783	0.0220935	-0.016581	0.381748	0.0069437	0.771766	-0.00343431	0.871322	-0.00237449	0.839186	0.0155396	0.497149	-0.0141402	0.544687	0.0157597	0.263646	0.0132687	0.391474	0.00908277	0.59622	0.00663439	0.796554	-0.0245127	0.167733	0.0138982	0.400238	0.00700128
rs7814022	-0.000768431	0.963834	-0.0188587	0.358823	-0.0248076	0.239744	-0.0229753	0.28239	0.00903027	0.598123	0.0149014	0.428991	-0.0199854	0.285493	-0.000829856	0.96141	0.000131665	0.99372	-0.0386204	0.051686	0.00994141	0.574313	-0.0136387	0.3899	0.000173597	0.991838	-0.0203305	0.343007	-0.0121505	0.522508	-0.00971444	0.354292	-0.0220684	0.282091	0.0135872	0.516514	0.0102089	0.418368	0.00570079	0.681326	0.00700165	0.648944	-0.000363015	0.987461	-0.000826802	0.958668	0.000763532	0.958926	-0.00594887
rs7873907	0.0123629	0.468458	0.0124208	0.54785	0.0438091	0.038864	-0.00487864	0.820474	-0.0107199	0.534101	-0.00299085	0.874652	-0.00027853	0.98819	-0.00840139	0.626113	-0.0055316	0.742221	-0.0157598	0.429783	0.00162175	0.927458	-0.0148164	0.35312	0.0252078	0.139739	0.0439734	0.0416047	0.023488	0.21869	0.0115644	0.273134	-0.0202331	0.326746	-0.0202404	0.336376	-0.00374933	0.767617	0.00756463	0.588193	0.00882769	0.568412	-0.0155049	0.504424	0.00745291	0.642182	0.000606468	0.967544	-0.00450918
rs79245415	-0.015891	0.646255	-0.0629001	0.134965	-0.0090416	0.833674	-0.034536	0.428564	0.00173083	0.960555	0.0161235	0.675066	-0.0378338	0.32158	6.22529e-05	0.99858	0.00997168	0.770433	-0.0281267	0.488018	-0.0256269	0.478007	-0.00378905	0.906824	-0.0630633	0.068907	0.00580139	0.894489	-0.0210049	0.588178	-0.040367	0.0595147	0.0314628	0.453923	-0.0343998	0.420806	-0.0137942	0.592151	-0.000887392	0.975036	0.00111367	0.971705	-0.0268574	0.568667	-0.0362154	0.265761	0.000509869	0.986568	-0.00430707
rs79582714	-0.0433021	0.117943	0.00714137	0.831456	0.0248162	0.47142	-0.0415049	0.23437	0.00829285	0.767002	-0.00297404	0.923011	0.00932407	0.760334	-0.0258933	0.354974	-0.0150411	0.58206	-0.0301672	0.352257	-0.0327746	0.256949	-0.00720324	0.781022	-0.038785	0.162358	-0.00521178	0.881807	-0.0252898	0.415403	0.0166823	0.330461	0.0259641	0.438249	-0.00958519	0.779276	0.00930668	0.65145	-0.0117196	0.605322	0.00527283	0.833751	0.0110559	0.769505	-0.0266277	0.306473	0.0135588	0.575612	0.00976181
rs7963801	0.000954808	0.957542	0.0281596	0.195547	-0.0104723	0.638901	-0.0419285	0.0634409	-0.0210076	0.24621	-0.0153765	0.440386	-0.00151456	0.939014	-0.00349288	0.847236	0.00313803	0.859223	-0.0319695	0.127877	-0.0181292	0.332877	0.00501616	0.764992	-0.0150248	0.403382	0.0189484	0.403544	-0.0116545	0.561897	-0.00621667	0.575394	-0.00752782	0.728919	0.0117857	0.594665	-0.00376321	0.777801	-0.0100075	0.49544	-0.00335105	0.836815	-0.035776	0.143106	-0.010473	0.534591	-0.00566507	0.717888	-0.00904735
rs7978070	0.00491677	0.774475	-0.0352485	0.0901442	-0.0160228	0.452968	-0.0253586	0.242084	-0.00661535	0.703009	0.00616634	0.746416	0.00568303	0.764233	-0.00829694	0.632695	0.0182657	0.281008	-0.0187756	0.35036	-0.0060607	0.735234	0.0123108	0.443273	0.000555875	0.974186	0.0112128	0.60585	-0.013175	0.493596	-0.00825935	0.436704	-0.0240421	0.246982	0.0188808	0.372901	-0.00251669	0.844077	-0.0199057	0.156785	-0.0207854	0.181741	0.00501737	0.830143	-0.0105989	0.511574	-0.018263	0.223891	-0.00783531
rs7998050	-0.00422258	0.818595	0.0375949	0.0920092	0.00241773	0.915986	0.0170117	0.464222	-0.00737836	0.691989	0.00601537	0.768979	-0.0095092	0.639847	-0.00725736	0.696912	-0.00142065	0.937697	0.01495	0.488421	-0.00398566	0.836036	-0.00576836	0.73797	-0.0136501	0.459878	-0.0183687	0.431121	0.0304729	0.140127	0.00737499	0.51744	0.00788071	0.723546	0.0107433	0.636704	-0.00608152	0.657544	0.0238195	0.114438	0.0173464	0.299454	0.0123153	0.623476	0.0241267	0.163852	0.0178254	0.268417	0.00617324
rs80170948	-0.00112649	0.981021	-0.00744913	0.896902	0.0596943	0.311256	0.00924542	0.877029	0.0330239	0.490152	0.0248964	0.636272	0.0783822	0.132903	0.0386444	0.419715	-0.00832086	0.858627	0.0768927	0.165643	0.0221021	0.655203	0.0070337	0.873877	-0.0187884	0.691533	0.014829	0.80489	-0.0425514	0.420196	0.0614582	0.0359216	-0.0838398	0.143998	-0.0250002	0.669187	-0.0214138	0.543694	0.0373	0.336095	0.0113943	0.790904	0.101041	0.116562	0.0330992	0.457472	-0.0165375	0.689566	-0.0214379
rs830386	0.0243625	0.224037	0.0183191	0.451205	0.0441829	0.0764441	0.0166324	0.510398	0.0244268	0.228182	0.0352224	0.113849	0.0136207	0.538103	0.0391454	0.0533897	0.0253466	0.200195	0.0066718	0.776226	0.00686018	0.743118	-0.00766678	0.682799	0.0229086	0.253624	0.0305342	0.228377	-0.0188887	0.400429	-0.00351836	0.776637	0.00838661	0.729726	-0.024069	0.330897	-0.0018108	0.903364	-0.00550027	0.737748	-0.00715813	0.693904	-0.0594373	0.0294645	-0.0201845	0.284322	-0.0112551	0.521029	0.00496057
rs889956	0.0243885	0.170335	0.0201539	0.34986	-0.0123583	0.576671	0.00653338	0.771148	-0.0140665	0.434281	-0.00152376	0.938566	0.00218437	0.911457	-0.0140479	0.434734	-0.00834626	0.634424	0.0216465	0.298577	-0.00364929	0.844256	-0.0240433	0.148561	0.0231089	0.194431	0.00798602	0.723007	0.0162629	0.414006	0.00557774	0.6124	-0.00679878	0.752088	-0.0247463	0.260003	-0.00131206	0.921161	0.00968318	0.506541	0.00489842	0.761498	-0.0222914	0.357895	0.0152749	0.361175	0.000103159	0.994709	-0.00287768
rs909674	0.0158955	0.40818	-0.016941	0.467153	-0.0319026	0.182416	0.0203489	0.401076	0.00685842	0.724058	0.00793269	0.710422	0.00861176	0.684764	-0.000642737	0.973628	0.00501909	0.791293	0.0389088	0.0838856	-0.0225366	0.261722	0.0139696	0.437859	-0.00296764	0.877499	-0.0225997	0.352561	-0.00858299	0.690596	-0.000637383	0.957263	0.0230718	0.321212	-0.00425163	0.857923	0.018597	0.193496	0.00614932	0.696062	0.00181512	0.917113	-0.0307333	0.240468	0.0201815	0.2644	0.00405059	0.809576	0.012216
rs9295486	0.0121081	0.480386	0.00334487	0.872366	-0.0145361	0.496361	0.000832429	0.969313	-0.0232506	0.180411	0.00503512	0.791813	0.0209024	0.269589	-0.0104671	0.54635	-0.00560918	0.740411	0.00333976	0.868048	-0.0184254	0.304133	0.0168526	0.294063	0.000497336	0.976904	-0.0196102	0.36689	0.00645024	0.73759	-0.0171473	0.106292	-0.021905	0.291899	-0.00179382	0.932599	-0.00271488	0.831655	0.00969837	0.490529	-0.00451892	0.771664	0.00091803	0.968669	0.014428	0.371336	-0.00311262	0.835667	-0.0117014
rs935116	-0.00987891	0.584234	-0.052199	0.0170802	-0.0208811	0.353186	-0.0124875	0.58383	-0.0259575	0.155202	-0.00525069	0.793666	-0.0260221	0.191391	-0.0114279	0.53138	-0.0245935	0.167245	-0.0149457	0.479683	-0.0279027	0.139092	-0.0279587	0.0980347	-0.0103853	0.566067	0.0036844	0.871954	-0.00787273	0.697221	0.0107256	0.337033	0.0469652	0.031608	0.0293465	0.188583	-0.00349624	0.794976	0.0115064	0.436864	0.00704441	0.667296	-0.00697299	0.776729	0.00769752	0.650376	0.0236422	0.134107	0.00381299
rs9384679	0.0438668	0.0139561	0.0558385	0.00980527	0.0608711	0.00609276	0.0221567	0.325299	0.0343636	0.056684	0.0333989	0.0921008	0.0099778	0.61259	0.0293862	0.103321	0.0241052	0.171101	0.01551	0.457929	0.0250433	0.179127	-0.0159251	0.340411	0.0277347	0.120541	0.015095	0.504142	0.041266	0.0394412	-0.0160984	0.145002	-0.0545151	0.0115484	-0.00801206	0.716188	0.00408266	0.758793	-0.015177	0.299018	-0.00739512	0.647819	-0.0405597	0.0953396	0.00971805	0.562554	-0.0144633	0.35417	-0.00536797
rs9451649	0.0193021	0.278484	0.00771967	0.720732	0.0144232	0.515406	0.00418429	0.852215	0.0106333	0.554656	0.0199278	0.314142	0.00571988	0.771133	0.00250054	0.889614	0.0393186	0.0252474	0.0305688	0.142847	0.0282864	0.128295	0.0253175	0.128799	-0.0014944	0.933238	0.0249426	0.268307	-0.0336671	0.0917091	-0.0232284	0.0350442	-0.0377035	0.0802411	-0.0146635	0.505228	-0.0057669	0.663546	-0.0106979	0.46323	-0.00733922	0.649761	-0.0155591	0.521488	-0.0186953	0.264556	-0.0280619	0.0715939	-0.0115186
rs9467777	0.0225317	0.264398	0.0573204	0.0190736	-0.0347697	0.166208	0.0113283	0.656334	0.0142575	0.484512	0.0281804	0.208897	0.00515239	0.817067	0.0456625	0.0252134	0.0231773	0.244547	0.0127392	0.589815	-0.031094	0.140052	0.0168346	0.372828	0.0391034	0.0530584	-0.0191818	0.452747	-0.0185514	0.412176	-0.0163123	0.191671	-0.026323	0.281045	0.000797239	0.974487	-0.0261216	0.0820677	-0.0166475	0.313759	-0.0170649	0.351278	0.0217026	0.429893	-0.0215617	0.256004	-0.0157142	0.373362	-0.0146696
rs9477970	-0.0177253	0.421688	0.0053169	0.842466	0.0269782	0.325919	-0.0206131	0.458804	-0.00780224	0.726486	0.00954511	0.697016	0.00727444	0.765179	0.0215635	0.333842	0.0139051	0.52288	0.0039751	0.877697	-0.044005	0.0560508	0.0227467	0.270448	-0.00508458	0.817886	-0.00319005	0.908989	-0.00156253	0.949509	0.000390492	0.977182	-0.0227979	0.393298	-0.0768436	0.00479204	-0.0100526	0.540463	0.00649415	0.719358	0.00144	0.942638	0.0175933	0.558393	-0.000944642	0.9637	-0.000899988	0.962786	-0.00338413
rs9489945	-0.0371094	0.0332195	-0.0224078	0.289366	0.00215461	0.920859	-0.0317762	0.148218	-0.025835	0.142433	-0.0181167	0.349722	-0.0154742	0.421213	-0.0133519	0.448996	-0.0243018	0.157727	-0.0488189	0.016745	-0.0297618	0.102052	-0.0244691	0.133721	-0.0499183	0.00421787	-0.0114961	0.602061	-0.0173312	0.375183	-0.00853425	0.428887	0.0107018	0.612264	-0.00492489	0.819014	0.0165933	0.200834	0.00511734	0.719967	0.00501548	0.751156	-0.0269874	0.255765	-0.0142739	0.384219	0.0162025	0.287908	0.0137467
rs9520384	-0.0010847	0.952791	0.0227321	0.306269	-0.0034041	0.881438	-0.0236122	0.306663	0.00277436	0.880951	0.00581909	0.775177	-0.0159402	0.43053	0.00339075	0.854823	0.0017065	0.924825	-0.0225687	0.293251	-0.0169055	0.377014	-0.00713427	0.677462	0.00438266	0.811263	0.012309	0.595448	-0.0233159	0.2563	-0.0175078	0.122515	-0.0237102	0.285106	-0.0213571	0.345742	-0.00493488	0.717383	-0.0393774	0.00867739	-0.0235842	0.156137	0.00820073	0.742508	-0.0311986	0.0702481	-0.0129838	0.417899	-0.00359325
rs9541479	0.0231165	0.184165	0.042958	0.0417463	0.0274276	0.205443	0.0112449	0.608741	0.0291502	0.0973557	0.0251802	0.193025	0.0233308	0.224726	0.0257412	0.143529	0.0395052	0.0213312	0.0339687	0.0955715	0.0486573	0.00741784	0.00818495	0.615273	0.0264269	0.129158	-0.0171443	0.436285	0.0202078	0.299769	-0.017828	0.0979032	-0.0436819	0.038089	-0.0148719	0.489121	-0.0262958	0.0424987	-0.0152057	0.28593	-0.0148187	0.34806	-0.00619822	0.793885	-0.0100794	0.538091	-0.0243865	0.108908	-0.0194691
rs9597254	-0.0450688	0.0288688	-0.0915496	0.000251474	-0.0133577	0.60298	-0.0586162	0.0243058	-0.00599704	0.773874	-0.025572	0.26484	-0.0200429	0.378726	0.00184874	0.929414	-0.0426752	0.0360392	-0.0287693	0.233854	-0.0425701	0.0482119	-0.0284633	0.140492	0.00108383	0.958204	0.0183645	0.481655	-0.0158934	0.492328	0.00833771	0.513719	0.0659557	0.00827476	0.00486918	0.848504	0.0172565	0.261384	-0.00693922	0.681601	0.0263454	0.159342	-0.00758463	0.787282	-0.0395247	0.0416912	0.0316358	0.0795273	0.00557541
rs9916613	0.0158988	0.370375	0.00754025	0.726225	-0.00993122	0.653095	0.0298586	0.182314	-0.00556405	0.756439	0.00969293	0.623231	0.0222744	0.255376	-0.00776951	0.665157	0.0131228	0.453645	0.0252544	0.224351	0.00874386	0.63711	-0.0102809	0.536089	0.02223	0.210898	0.0139472	0.534729	0.0128069	0.519072	-0.00444492	0.685733	0.0207249	0.334993	-0.0443372	0.0431402	-0.00601954	0.648754	0.0111101	0.444675	0.0110288	0.49349	-0.0373405	0.122398	0.0257946	0.122341	0.00158852	0.918482	0.0013465
rs9921412	-0.00686336	0.717943	-0.0138585	0.547297	-0.0157635	0.505	-0.0197735	0.408947	-0.0132062	0.491599	-0.0142858	0.498615	0.0179185	0.392711	0.00224836	0.906818	-0.0242875	0.195523	-0.0461491	0.0380205	-0.0104985	0.596714	0.0179063	0.313768	0.00926086	0.626681	-0.0159117	0.50787	-0.0105593	0.619677	0.00732209	0.533489	0.0274091	0.233116	0.00465847	0.842658	0.0151187	0.284732	0.00681046	0.661599	0.0143912	0.403687	0.0139497	0.589858	-0.0167236	0.349231	0.0354941	0.032774	0.0119332
rs9934041	-0.0155093	0.397026	-0.0352466	0.112619	-0.0426353	0.0614006	0.00452875	0.844619	-0.0101102	0.585144	-0.029484	0.147505	0.0235113	0.244734	-0.0128305	0.488505	-0.0176356	0.328995	-0.00105678	0.960715	-0.0280053	0.143465	-0.0171531	0.31694	-0.00971646	0.596242	0.043754	0.0590042	-0.0113085	0.58161	0.0013617	0.904364	0.0058713	0.791252	0.0234695	0.29958	-0.00213249	0.875748	0.000321363	0.982916	0.00868296	0.601351	-0.0303592	0.22366	-0.00361987	0.833594	0.0136894	0.392585	0.00551496
[truncated: 71 more columns]
